# Supplementary material for: Deep mining of oxysterols and cholestenoic acids in human plasma and cerebrospinal fluid: Quantification using isotope dilution mass spectrometry
Source: PubMed Central journal article supplement (PMC7988461; doi:10.1016/j.aca.2021.338259), 2021-04-15

## SUPPLEMENTAL MATERIAL

### **Deep Mining of Oxysterols and Cholestenic Acids in Human Plasma and Cerebrospinal Fluid: Quantification using Isotope Dilution Mass Spectrometry**

Eylan Yutuc<sup>1</sup>, Alison L. Dickson<sup>1</sup>, Manuela Pacciarini<sup>1</sup>, Lauren Griffiths<sup>1</sup>, Paul R.S. Baker<sup>2</sup>, Lisa Connell<sup>2</sup>, Anders Öhman<sup>3</sup>, Lars Forsgren<sup>4</sup>, Miles Trupp<sup>4</sup>, Sílvia Vilarinho<sup>5</sup>, Youssef Khalil<sup>6</sup>, Peter T. Clayton<sup>6</sup>, Sinan Sari<sup>7</sup>, Buket Dalgic<sup>7</sup>, Philip Höflinger<sup>8</sup>, Ludger Schöls<sup>8,9</sup>, William J. Griffiths<sup>1</sup> and Yuqin Wang<sup>1</sup>

<sup>1</sup>Swansea University Medical School, ILS1 Building, Singleton Park, Swansea SA2 8PP, Wales, UK

<sup>2</sup>Avanti Polar Lipids Inc, Alabaster, AL, USA

<sup>3</sup>Department of Integrative Medical Biology, Umeå University, SE-901 87 Umeå, Sweden

<sup>4</sup>Department of Clinical Science, Neurosciences, Umeå University, SE-901 85 Umeå, Sweden

<sup>5</sup>Departments of Internal Medicine, Section of Digestive Diseases, and of Pathology, Yale University School of Medicine, New Haven, CT, USA

<sup>6</sup>Inborn Errors of Metabolism, Genetics and Genomic Medicine, UCL Great Ormond Street Institute of Child Health, 30 Guilford Street, London WC1N 1EH, UK

<sup>7</sup>Department of Pediatrics, Division of Gastroenterology, Gazi University Faculty of Medicine, Ankara, Turkey

<sup>8</sup>Department of Neurology and Hertie Institute for Clinical Brain Research, University of Tübingen, Tübingen, Germany

<sup>9</sup>German Center for Neurodegenerative Diseases (DZNE), Tübingen

## Supplemental Information

### Supplemental Methods

**Flowchart 1.** Schematic illustration of sample preparation. Single-phase liquid extraction is performed into ethanol containing internal standards in the presence or absence of 0.35 M KOH.

**Flowchart 2.** Different protocols for single-phase liquid extraction.

**Flowchart 3.** Flowchart showing sterol identification and quantification routine.

### Supplemental Figures and Tables

**Figure S1.** *Syn* (*Z*) and *anti* (*E*) conformers of the GP-derivative exemplified for 24S-HC. Also shown are 3D minimised energy structures (Chem 3D Pro). MS<sup>2</sup> fragmentation results in loss of the pyridine (Py) group with the formation of the [M-Py]<sup>+</sup> fragment ion.

**Figure S2.** LC-MS separation of GP-derivatised monohydroxycholesterols (HC). (A) Mass spectrometric peaks at *m/z* 546.48 corresponding to the [M]<sup>+</sup> ion of [<sup>2</sup>H<sub>7</sub>]24S-HC (upper panel); the [M+1]<sup>+</sup> ion of [<sup>2</sup>H<sub>6</sub>]26-HC (lower panel); and unresolved [M]<sup>+</sup> ion of [<sup>2</sup>H<sub>7</sub>]24R-HC and the [M+1]<sup>+</sup> ion of [<sup>2</sup>H<sub>6</sub>]26-HC (central panel). The structure of the [M+1]<sup>+</sup> ion of [<sup>2</sup>H<sub>6</sub>]26-HC is arbitrarily drawn with a <sup>13</sup>C at C-21. (B) Upper panel, TIC 534.4→455.4 for monohydroxycholestenones in plasma. Lower panel TICs 541.5→462.4 for [<sup>2</sup>H<sub>7</sub>]-labelled monohydroxycholesterols.

**Figure S3.** MS<sup>3</sup> fragmentation of GP-derivatised monohydroxycholesterols in plasma. MS<sup>3</sup> ([M]<sup>+</sup>→[M-Py]<sup>+</sup>) spectra of (A) 24S-HC; (B) 24R-HC; (C) [<sup>2</sup>H<sub>7</sub>]24S-HC; (D) [<sup>2</sup>H<sub>7</sub>]24R-HC; (E) 25-HC; (F) [<sup>2</sup>H<sub>6</sub>]25-HC; (G) (25R)26-HC; (H) [<sup>2</sup>H<sub>6</sub>](25R)26-HC; (I) [<sup>2</sup>H<sub>7</sub>]22R-HC; (J) 22S-HC; (K) [<sup>2</sup>H<sub>7</sub>]22S-HC. The formation of key fragment ions is illustrated in Figure S4A-D.

**Figure S4.** Key fragmentation routes in the MS<sup>n</sup> spectra of GP-derivatised oxysterols. Mechanisms of side-chain cleavage are indicated by purple arrows. (A) 24R/S-HC and [<sup>2</sup>H<sub>6</sub>]24R/S-HC; (B) 25-HC and [<sup>2</sup>H<sub>6</sub>]25-HC; (C) (25R)26-HC and [<sup>2</sup>H<sub>6</sub>](25R)26-HC; (D) 22R/S-HC and [<sup>2</sup>H<sub>7</sub>]22R/S-HC; (E) 7-HC and [<sup>2</sup>H<sub>7</sub>]7-HC; (F) 6β-HC and [<sup>2</sup>H<sub>7</sub>]6β-HC; (G) 7-OC and [<sup>2</sup>H<sub>7</sub>]7-OC; (H) 12α-HC; (I) 7α,25-diHC and [<sup>2</sup>H<sub>6</sub>]7α,25-diHC; (J) 7α,(25R/S)26-diHC and [<sup>2</sup>H<sub>6</sub>]7α,(25R/S)26-diHC; (K) 7α,12α-diHC; (L) 3β,7-diHCA(25R/S) and [<sup>2</sup>H<sub>3</sub>]3β,7-diHCA(25R/S); (M) 25-D<sub>3</sub> and [<sup>2</sup>H<sub>6</sub>]25-D<sub>3</sub>; (N) 3βH-Δ<sup>5</sup>-BA and 3β,7-diH-Δ<sup>5</sup>-BA; (O) 3β-HCA; (P) 3β,7α,24-triHCA; (Q) 3β,7α,25-triHCA; (R) 3β,7α,12α-triHCA; (S) 3β,25-diHCA; (T) 3β,27-diHCA; (U) 3β,22,25-triHCA-24O; (V) 3β,22-diHCA-24O.

**Figure S5.** MS<sup>3</sup> fragmentation of GP-derivatised monohydroxycholesterols and monohydroxycholestenones in plasma. MS<sup>3</sup> ([M]<sup>+</sup>→[M-Py]<sup>+</sup>) spectra of (A) 7β-HC; (B) [<sup>2</sup>H<sub>7</sub>]7β-HC; (C) 7α-HC; (D) [<sup>2</sup>H<sub>7</sub>]7α-HC; (E) 6β-HC (5α,6β-diHC-18), generated from the acid catalysed dehydration of 5α,6β-diHC; (F) [<sup>2</sup>H<sub>7</sub>]6β-HC ([<sup>2</sup>H<sub>7</sub>]5α,6β-18) generated from the acid catalysed dehydration of [<sup>2</sup>H<sub>7</sub>]5α,6β-diHC; (G) 7-OC; (H) [<sup>2</sup>H<sub>7</sub>]7-OC; (I) 7α-HCO; (J) [<sup>2</sup>H<sub>7</sub>]7α-HCO; (K) 12α-HC (no authentic standard). The formation of key fragment ions is illustrated in Figure S4E-H.

**Figure S6.** LC-MS separation of GP-derivatised dihydroxycholesterols, dihydroxycholestenones (diHCO), dihydroxycholestenonic (diHCA) and hydroxyoxocholestenonic (H,O-CA) acids. (A) RIC for the [M]<sup>+</sup> ions of (upper panel) 7α,25-diHC + 7α,25-diHCO and 7α,(25R/S)26-diHC + 7α,(25R/S)26-diHCO (555.4317 ± 5 ppm) found in plasma and (lower panel) [<sup>2</sup>H<sub>6</sub>]7α,25-diHC and [<sup>2</sup>H<sub>6</sub>]7α,(25R/S)26-diHC (561.4694 ± 5 ppm) over a 37 min gradient. (B) RIC of the [M]<sup>+</sup> ions of dihydroxycholestenones (550.4003 ± 5 ppm) found in plasma. Upper panel 37 min gradient, lower panel 17 min gradient. (C) RIC for the [M]<sup>+</sup> ions of (upper panel) 7αH,3O-CA(25R/S) (564.3796 ± 5 ppm) found in plasma and (lower panel) [<sup>2</sup>H<sub>3</sub>]7αH,3O-CA(25R/S) (567.3984 ± 5 ppm) over a 37 min gradient. (D) RIC for the [M]<sup>+</sup>

ions of (upper panel)  $7\alpha\text{H},3\text{O-CA}(25\text{R}/\text{S}) + 3\beta,7\alpha\text{-diHCA}(25\text{R}/\text{S})$  ( $569.4110 \pm 5$  ppm) found in plasma and (lower panel)  $[^2\text{H}_3]7\alpha\text{H},3\text{O-CA}(25\text{R}/\text{S})$  ( $572.4298 \pm 5$  ppm) over a 37 min gradient. Coloured dashed lines indicate the coincidence of oxysterols between chromatograms.

**Figure S7.**  $\text{MS}^3$  fragmentation of GP-derivatised dihydroxycholesterols (diHC) and dihydroxycholestenones (diHCO) in plasma.  $\text{MS}^3$  ( $[\text{M}]^+ \rightarrow [\text{M-Py}]^+ \rightarrow$ ) spectra of (A)  $7\alpha,25\text{-diHC} + 7\alpha,25\text{-diHCO}$ ; (B)  $[^2\text{H}_6]7\alpha,25\text{-diHC}$ ; (C)  $7\alpha,(25\text{S})26\text{-diHC} + 7\alpha,(25\text{S})26\text{-diHCO}$ ; (D)  $[^2\text{H}_6]7\alpha,(25\text{S})26\text{-diHC}$ ; (E)  $7\alpha,(25\text{R})26\text{-diHC} + 7\alpha\text{H},(25\text{R})26\text{-diHCO}$ ; (F)  $[^2\text{H}_6]7\alpha,(25\text{R})26\text{-diHC}$ ; (G)  $7\alpha,25\text{-diHCO}$ ; (H)  $7\alpha,(25\text{R})26\text{-diHCO}$ ; (I)  $7\alpha,12\alpha\text{-diHC}$ . The formation of key fragment ions is illustrated in Figure S4I – S4K.

**Figure S8.**  $\text{MS}^3$  fragmentation of GP-derivatised dihydroxycholestenic (diHCA) and hydroxyoxocholestenic (H,O-CA) acids in plasma.  $\text{MS}^3$  ( $[\text{M}]^+ \rightarrow [\text{M-Py}]^+ \rightarrow$ ) spectra of (A)  $3\beta,7\beta\text{-diHCA}(25\text{R})$ ; (B)  $3\beta,7\alpha\text{-diHCA}(25\text{S}) + 7\alpha\text{H},3\text{O-CA}(25\text{S})$ ; (C)  $[^2\text{H}_3]3\beta,7\alpha\text{-diHCA}(25\text{S})$ ; (D)  $3\beta,7\alpha\text{-diHCA}(25\text{R}) + 7\alpha\text{H},3\text{O-CA}(25\text{R})$ ; (E)  $[^2\text{H}_3]3\beta,7\alpha\text{-diHCA}(25\text{R})$ ; (F)  $7\alpha\text{H},3\text{O-CA}(25\text{S})$ ; (G)  $7\alpha\text{H},3\text{O-CA}(25\text{R})$ ; (H)  $[^2\text{H}_3]7\alpha\text{H},3\text{O-CA}(25\text{R})$ . The formation of key fragment ions is illustrated in Figure S4L.

**Figure S9.** LC-MS( $\text{MS}^3$ ) of cholesterol and other lipophilic sterols in plasma. (A) RIC for the  $[\text{M}]^+$  ions of cholesterol (upper panel,  $523.4419 \pm 5$  ppm),  $[^2\text{H}_7]\text{cholesterol}$  (central panel,  $530.4858 \pm 5$  ppm) and isomers of cholestadien- $3\beta\text{-ol}$  (lower panel  $521.4262 \pm 5$  ppm).  $\text{MS}^3$  ( $[\text{M}]^+ \rightarrow [\text{M-Py}]^+ \rightarrow$ ) spectra of (B) cholesterol, (C)  $[^2\text{H}_7]\text{cholesterol}$ , (D) desmosterol (24-DHC) and (E) 8(9)-dehydrocholesterol (8-DHC). The formation of key fragment ions is illustrated in (F – H).

**Figure S10.** LC-MS separation of GP-derivatised 25-hydroxyvitamin  $\text{D}_3$  and sterol-acids in plasma. (A) RIC for the  $[\text{M}]^+$  ions of 25- $\text{D}_3$  ( $537.4211 \pm 5$  ppm, upper panel) and  $[^2\text{H}_6]25\text{-D}_3$  ( $543.4588 \pm 5$  ppm, lower panel); (B)  $3\beta\text{H-}\Delta^5\text{-BA}$  ( $511.3691 \pm 5$  ppm); (C)  $3\beta,7\beta\text{-diH-}\Delta^5\text{-BA}$  and  $3\alpha,7\alpha\text{-diH-}\Delta^5\text{-BA} + 7\alpha\text{H},3\text{O-}\Delta^4\text{-BA}$  ( $527.3640 \pm 5$  ppm, upper panel);  $7\alpha\text{H},3\text{O-}\Delta^4\text{-BA}$  ( $522.3326 \pm 5$  ppm, lower panel,); (D)  $3\beta\text{-HCA} + 3\text{O-CA}$  ( $553.4161 \pm 5$  ppm, upper panel,);  $3\text{O-CA}$  ( $548.3847 \pm 5$  ppm, lower panel,); (E - H)  $3\beta,7\alpha,24\text{-triHCA} + 7\alpha,24\text{-diH},3\text{O-CA}$ ,  $3\beta,7\alpha,25\text{-triHCA} + 7\alpha,25\text{-diH},3\text{O-CA}$  and  $3\beta,7\alpha,12\alpha\text{-triHCA} + 7\alpha,12\alpha\text{-diH},3\text{O-CA}$  ( $585.4059 \pm 5$  ppm, upper panels); (E) Lower panel,  $7\alpha,24\text{-diH},3\text{O-CA}$ ,  $7\alpha,25\text{-diH},3\text{O-CA}$  and  $7\alpha,12\alpha\text{-diH},3\text{O-CA}$  ( $580.3739 \pm 5$  ppm); (F – H) Lower panels show MRM chromatograms targeting (F)  $3\beta,7\alpha,24\text{-triHCA} + 7\alpha,24\text{-diH},3\text{O-CA}$ ; (G)  $3\beta,7\alpha,25\text{-triHCA} + 7\alpha,25\text{-diH},3\text{O-CA}$ ; (H)  $3\beta,7\alpha,12\alpha\text{-triHCA}$  and  $7\alpha,12\alpha\text{-diH},3\text{O-CA}$ . Authentic standards are not available for  $3\beta,7\alpha,12\alpha\text{-triHCA}$  and  $7\alpha,12\alpha\text{-diH},3\text{O-CA}$ . Coloured dashed lines indicate the coincidence of oxysterols between chromatograms.  $\text{MS}^3$  spectra are presented in Figures S11 & S12.

**Figure S11.**  $\text{MS}^3$  fragmentation of GP-derivatised 25-hydroxyvitamin  $\text{D}_3$  and sterol acids in plasma.  $\text{MS}^3$  ( $[\text{M}]^+ \rightarrow [\text{M-Py-H}_2\text{O}]^+ \rightarrow$ ) spectra of (A) 25- $\text{D}_3$  and (B)  $[^2\text{H}_6]25\text{-D}_3$ .  $\text{MS}^3$  ( $[\text{M}]^+ \rightarrow [\text{M-Py}]^+ \rightarrow$ ) spectra of (C)  $3\beta\text{H-}\Delta^5\text{-BA}$ ; (D)  $3\beta,7\beta\text{-diH-}\Delta^5\text{-BA}$ ; (E)  $3\beta,7\alpha\text{-diH-}\Delta^5\text{-BA} + 7\alpha\text{H},3\text{O-}\Delta^4\text{-BA}$ ; (F)  $7\alpha\text{H},3\text{O-}\Delta^4\text{-BA}$ ; (G)  $3\beta\text{-HCA} + 3\text{O-CA}$ ; (H)  $3\text{O-CA}$ . The formation of key fragment ions is illustrated in Figure S4M-O.

**Figure S12.**  $\text{MS}^3$  fragmentation of GP-derivatised of trihydroxycholestenic (triHCA) and dihydroxy-3-oxocholestenic acids (diH,3O-CA) in plasma.  $\text{MS}^3$  ( $[\text{M}]^+ \rightarrow [\text{M-Py}]^+ \rightarrow$ ) spectra of (A)  $3\beta,7\alpha,24\text{-triHCA} + 7\alpha,24\text{-diH},3\text{O-CA}$ ; (B)  $3\beta,7\alpha,25\text{-triHCA} + 7\alpha,25\text{-diH},3\text{O-CA}$ ; (C)  $3\beta,7\alpha,12\alpha\text{-triHCA} + 7\alpha,12\alpha\text{-diH},3\text{O-CA}$  (no authentic standard). The formation of key fragment ions is illustrated in Figure S4P-R.

**Figure S13.**  $\text{MS}^3$  fragmentation of GP-derivatised oxysterols in plasma.  $\text{MS}^3$  spectra of the postulated structures (A)  $3\beta,25\text{-diHCA}$  or  $3\beta,25,x\text{-trihydroxycholest-5-en-y-one}$  (no authentic standards available); (B)  $3\beta,27\text{-diHCA}$  or  $3\beta,27,x\text{-trihydroxycholest-5-en-y-one}$  (no authentic standards available); (C)  $3\beta,x\text{-diHCA}$  or  $3\beta,x,y\text{-trihydroxycholest-5-en-z-one}$  (no authentic standards available); (D)  $3\beta,22,25\text{-trihydroxycholest-5-en-24-one}$  or  $3\beta,x\text{-diHCA}$  (no authentic standard); (E)  $3\beta,22\text{-dihydroxycholest-5-en-24-one}$  or  $3\beta,20\text{-dihydroxycholest-5-en-22-one}$  (no authentic standard); (F)  $7\alpha,x\text{-diH},3\text{O-CA}$  (no

authentic standard). The more likely structures are given in *italics*. The formation of key fragment ions is illustrated in Figure S4S-V.

**Figure S14.** MS<sup>3</sup> fragmentation of GP-derivatised of trihydroxycholestenoic (triHCA) and dihydroxy-3-oxocholestenoic acids (diH,3O-CA) in CSF. MS<sup>3</sup> ([M]<sup>+</sup>→[M-Py]<sup>+</sup>→) spectra of (A) 3β,7α,24-triHCA + 7α,24-diH,3O-CA; (B) 3β,7α,25-triHCA + 7α,25-diH,3O-CA; (C) 3β,7α,12α-triHCA + 7α,12α-diH,3O-CA (no authentic standard) and (D) 3β,7α,x-triHCA + 7α,x-diH,3O-CA. The formation of key fragment ions is illustrated in Figure S4P-R.

**Table S1.** Systematic and common names of sterols including oxysterols and sterol-acids identified or partially identified in the current study. Supplier of reference standards are indicated when available.

**Table S2.** Figures of merits when varying amount of OxysterolSPLASH at a plasma volume of 100 μL.

**Table S3.** Figures of merit revealed by standards additions to (A) 100 μL of plasma using 50 μL of OxysterolSPLASH and (B) 100 μL CSF using 20 μL of OxysterolSPLASH.

**Table S4.** Diagnostic fragment ions and simple rules for structure determination of GP-derivatised sterols.

# Flowchart 1

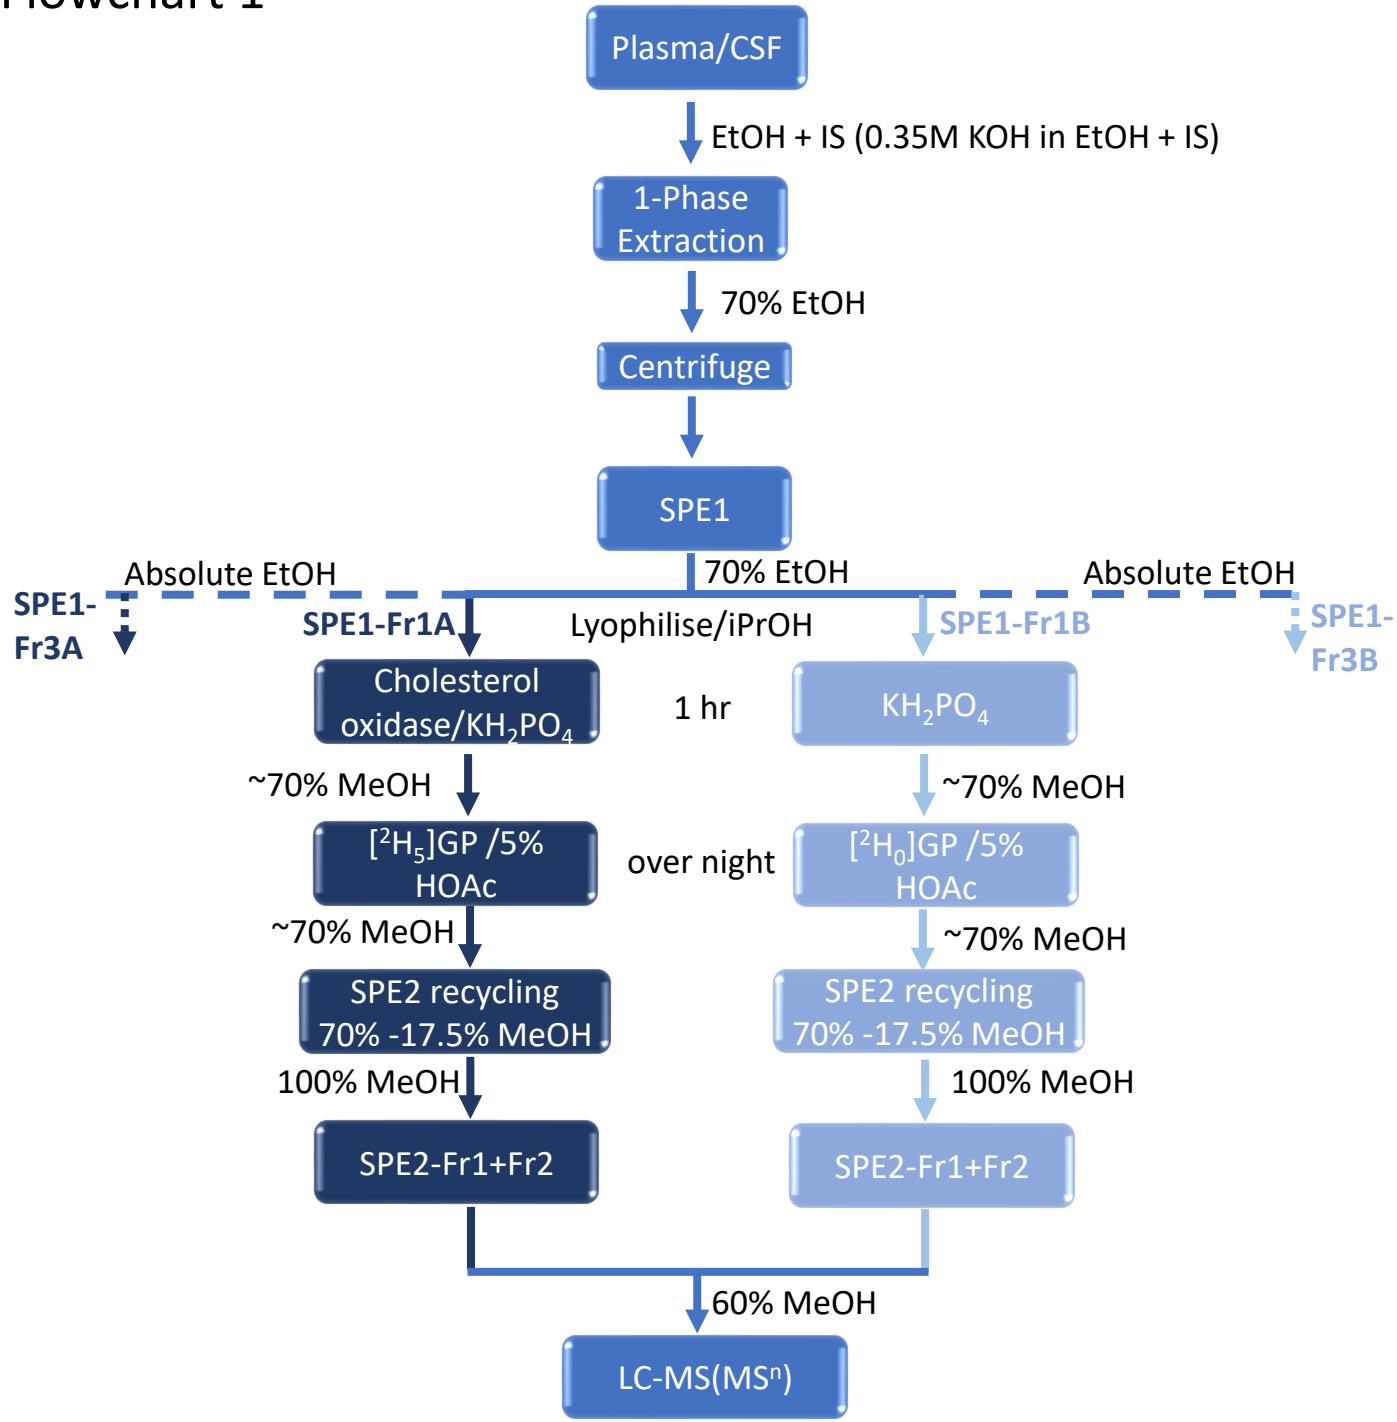

Schematic illustration of sample preparation. Single-phase liquid extraction is performed into ethanol containing internal standards in the presence or absence of 0.35 M KOH

Flowchart 2. Different protocols for single-phase liquid extraction.

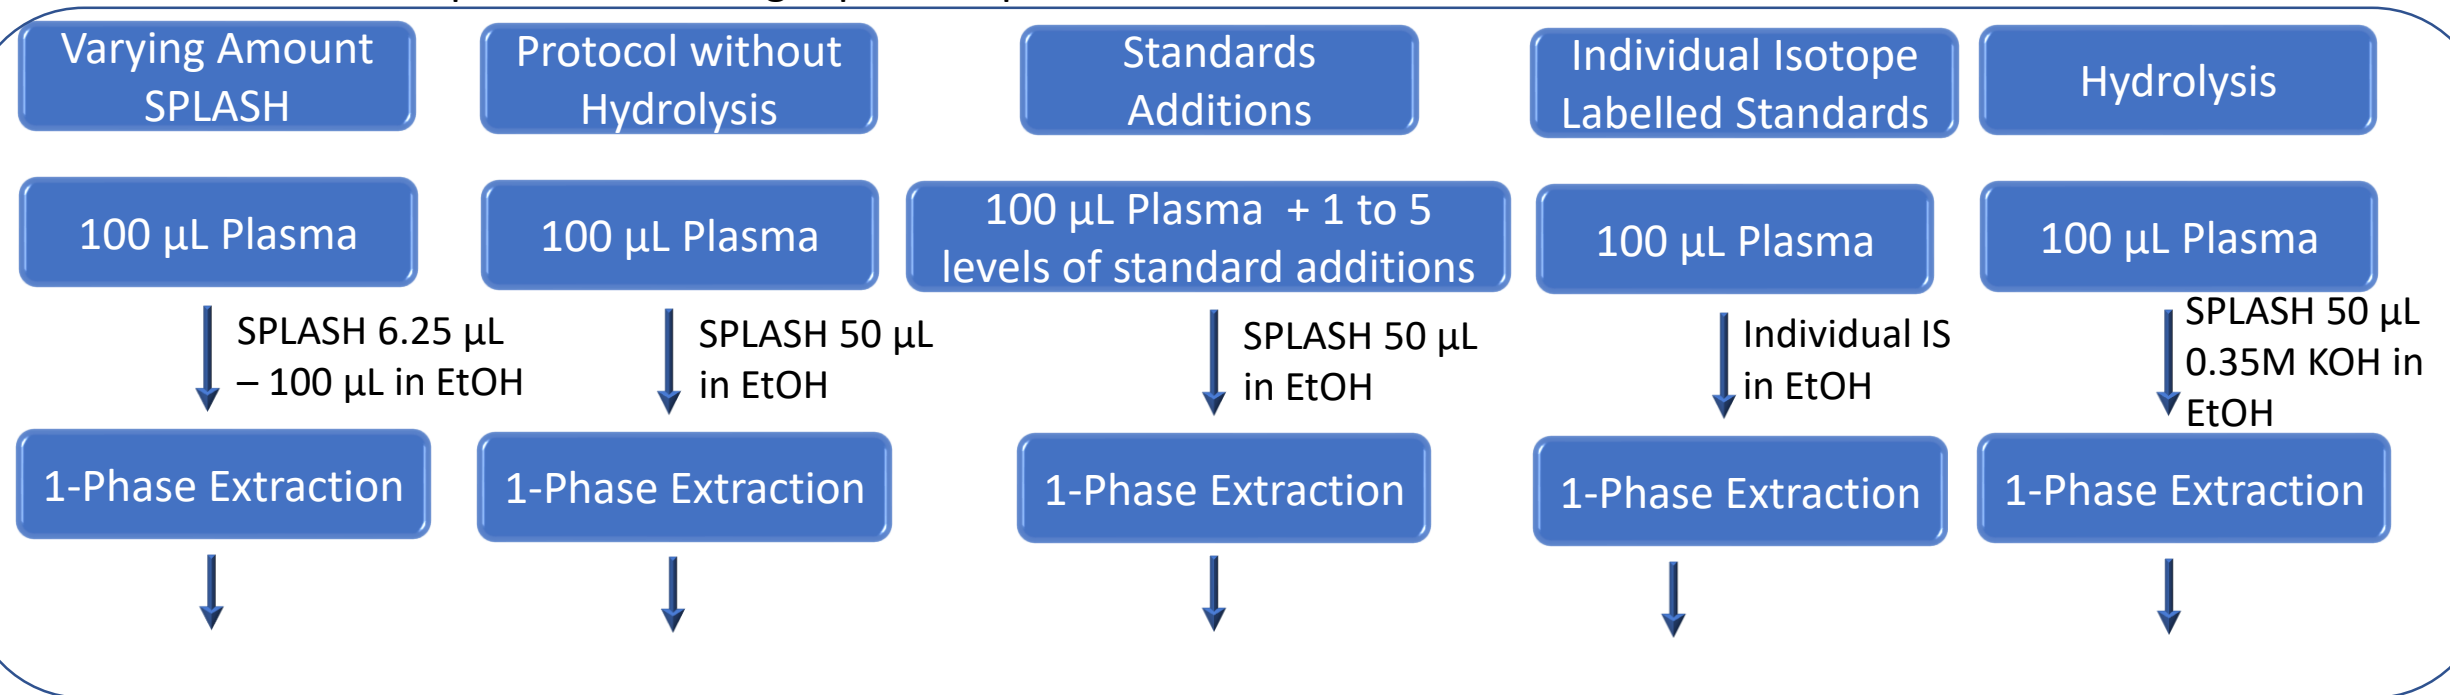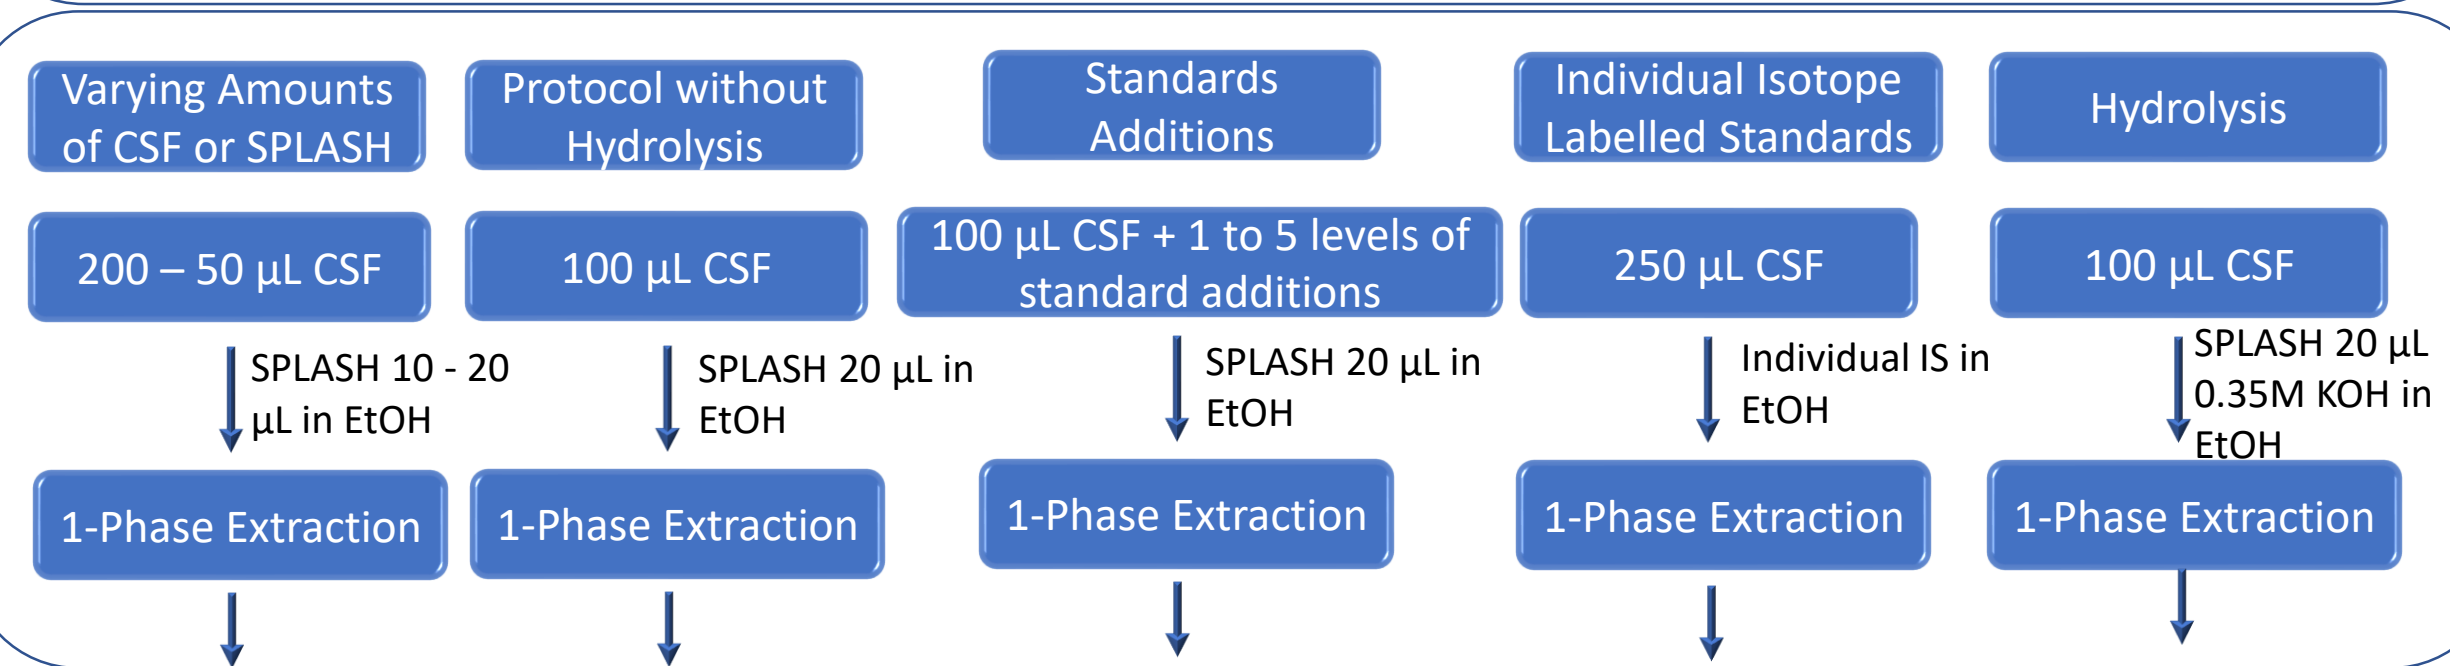



## Flowchart 3

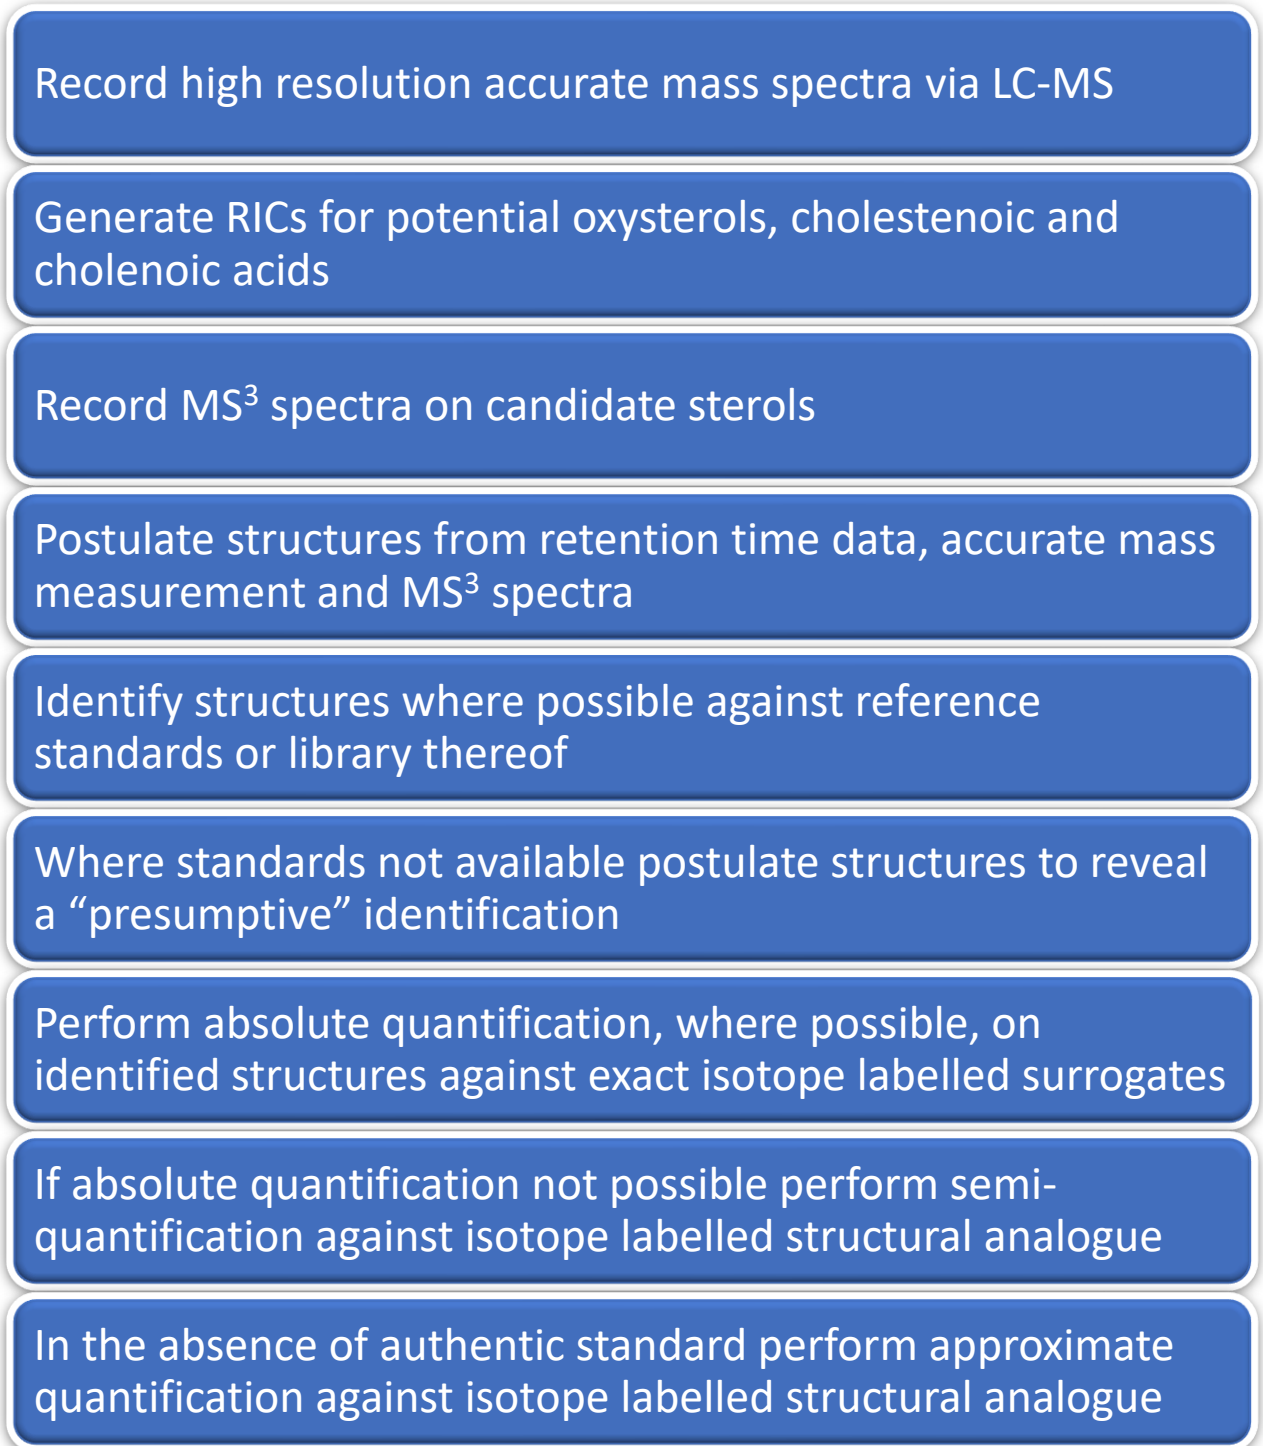

Flowchart showing sterol identification and quantification routine



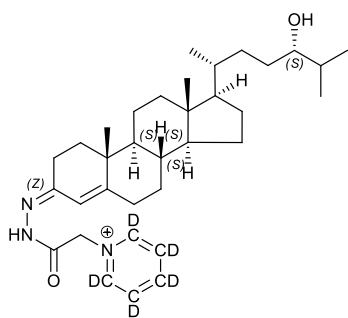

Chemical Formula:  $C_{34}H_{47}D_5N_3O_2^+$   
Exact Mass: 539.4368

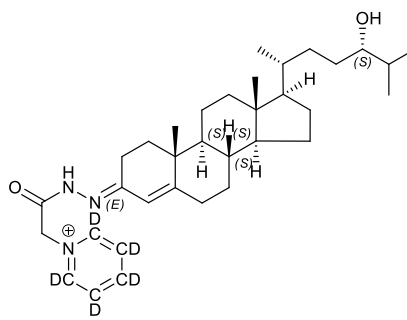

Chemical Formula:  $C_{34}H_{47}D_5N_3O_2^+$   
Exact Mass: 539.4368

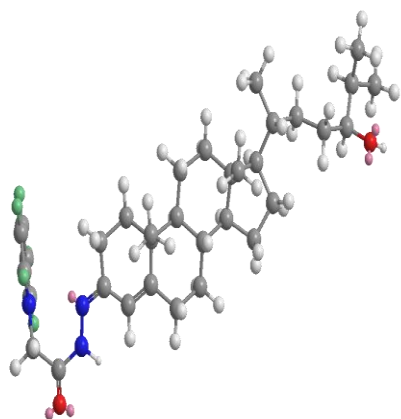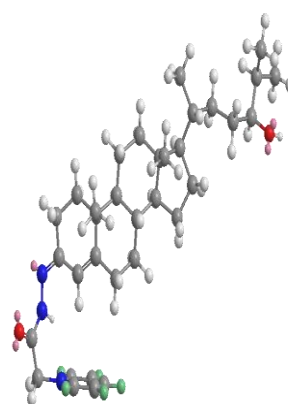

$MS^2$

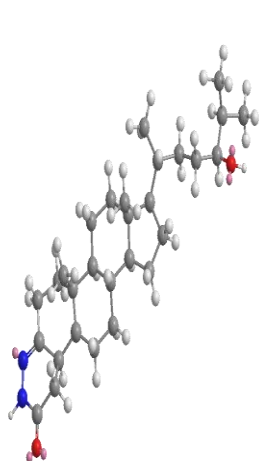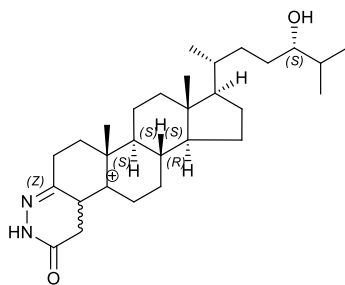

Chemical Formula:  $C_{29}H_{47}N_2O_2^+$   
Exact Mass: 455.3632

$[M-Py]^+$

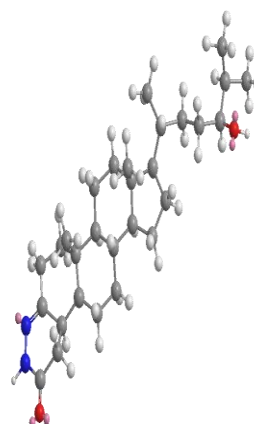

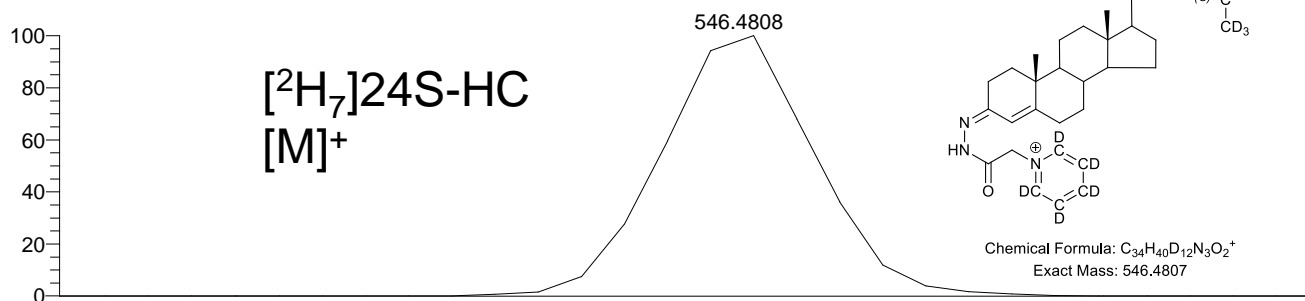

NL: 1.36E5  
EY\_191014\_100uL-NIST-  
QC\_100uL-  
OxySplash\_rep2of5\_Fr1A=GPd5\_Fr  
1B=GPd0\_s2\_03#3073 RT: 14.89  
AV: 1 F: FTMS + p ESI Full ms  
[400.00-610.00]

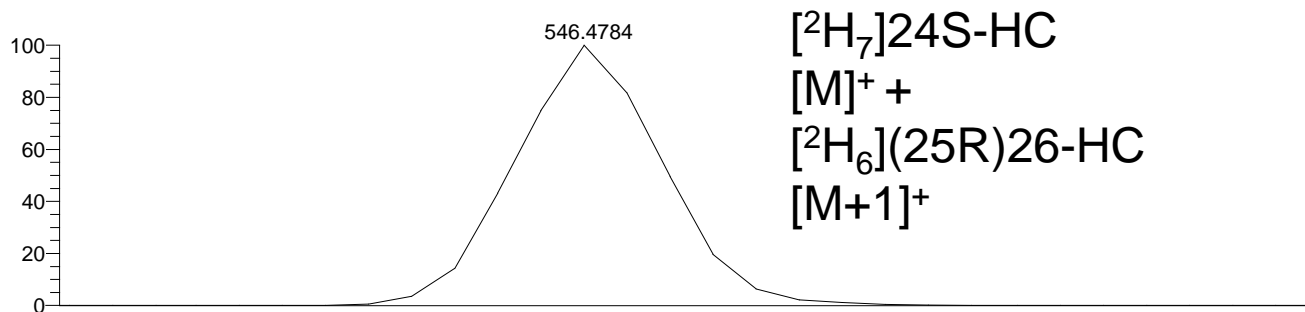

NL: 2.16E5  
EY\_191014\_100uL-NIST-  
QC\_100uL-  
OxySplash\_rep2of5\_Fr1A=GPd5\_Fr  
1B=GPd0\_s2\_03#3589 RT: 17.40  
AV: 1 F: FTMS + p ESI Full ms  
[400.00-610.00]

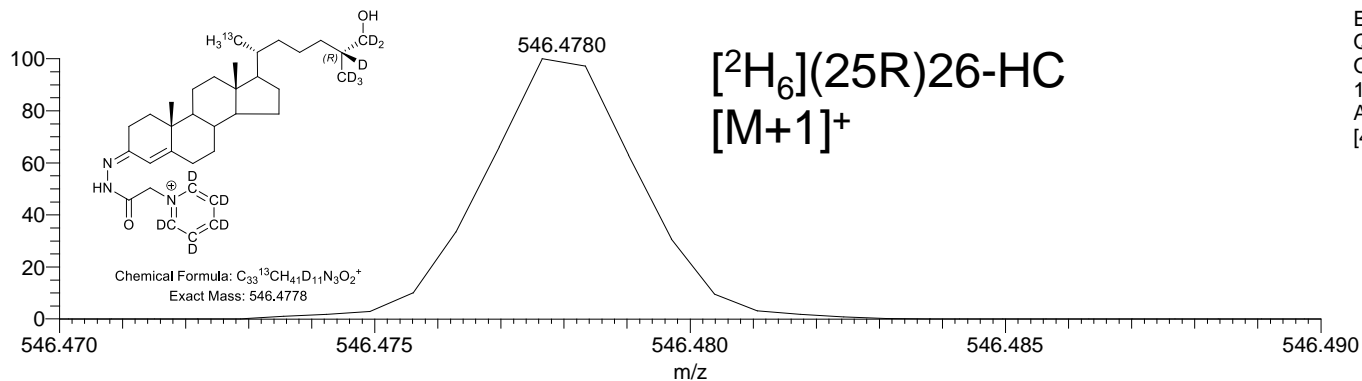

NL: 1.77E5  
EY\_191014\_100uL-NIST-  
QC\_100uL-  
OxySplash\_rep2of5\_Fr1A=GPd5\_Fr  
1B=GPd0\_s2\_03#3601 RT: 17.46  
AV: 1 F: FTMS + p ESI Full ms  
[400.00-610.00]

RT: 0.00 - 17.02

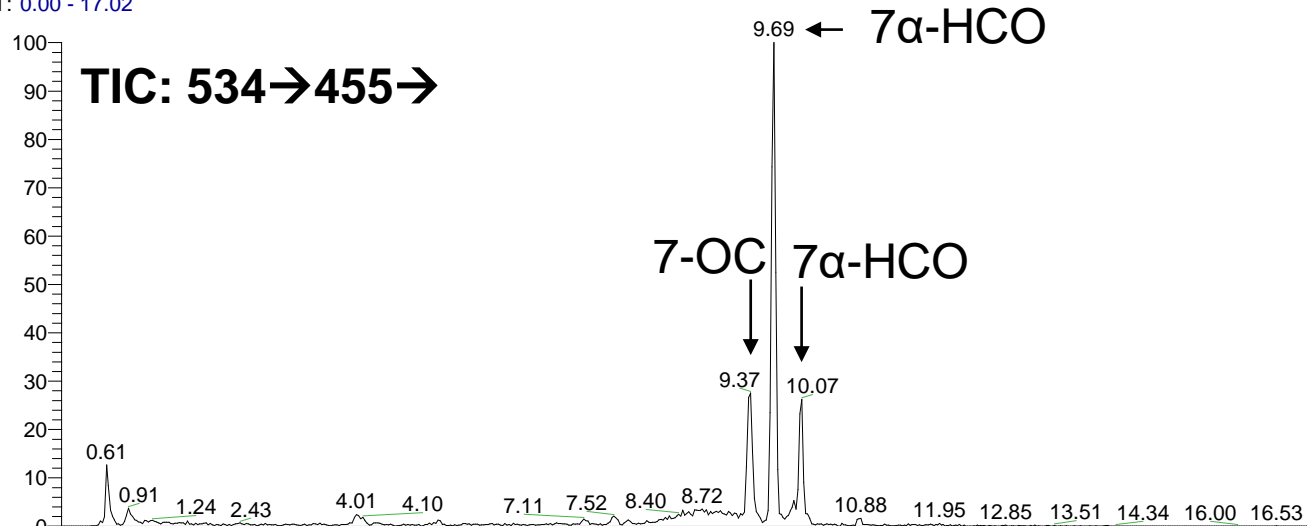

NL: 2.34E4  
TIC F: ITMS + c ESI Full ms3  
534.41@cid30.00 455.36@cid35.00  
[125.00-550.00] MS  
EY\_191014\_100uL-NIST-QC\_100uL-  
OxySplash\_rep2of5\_Fr1A=GPd5\_Fr1B=  
GPd0\_s2\_02

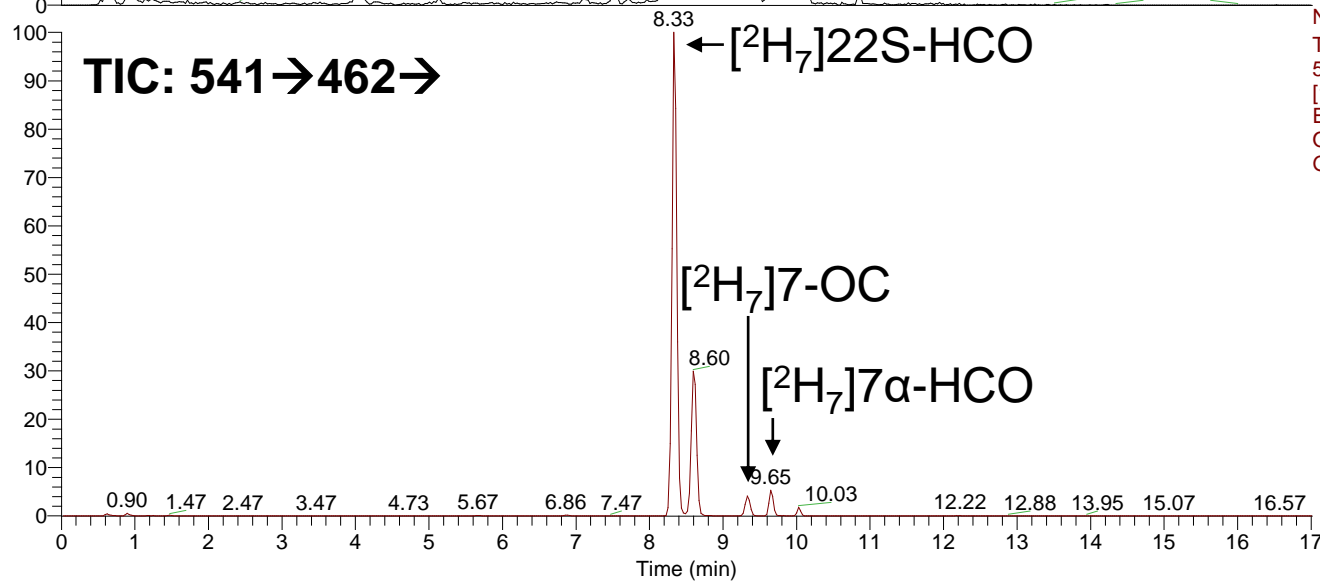

NL: 3.00E5  
TIC F: ITMS + c ESI Full ms3  
541.45@cid30.00 462.41@cid35.00  
[125.00-555.00] MS  
EY\_191014\_100uL-NIST-QC\_100uL-  
OxySplash\_rep2of5\_Fr1A=GPd5\_Fr1B=  
GPd0\_s2\_02

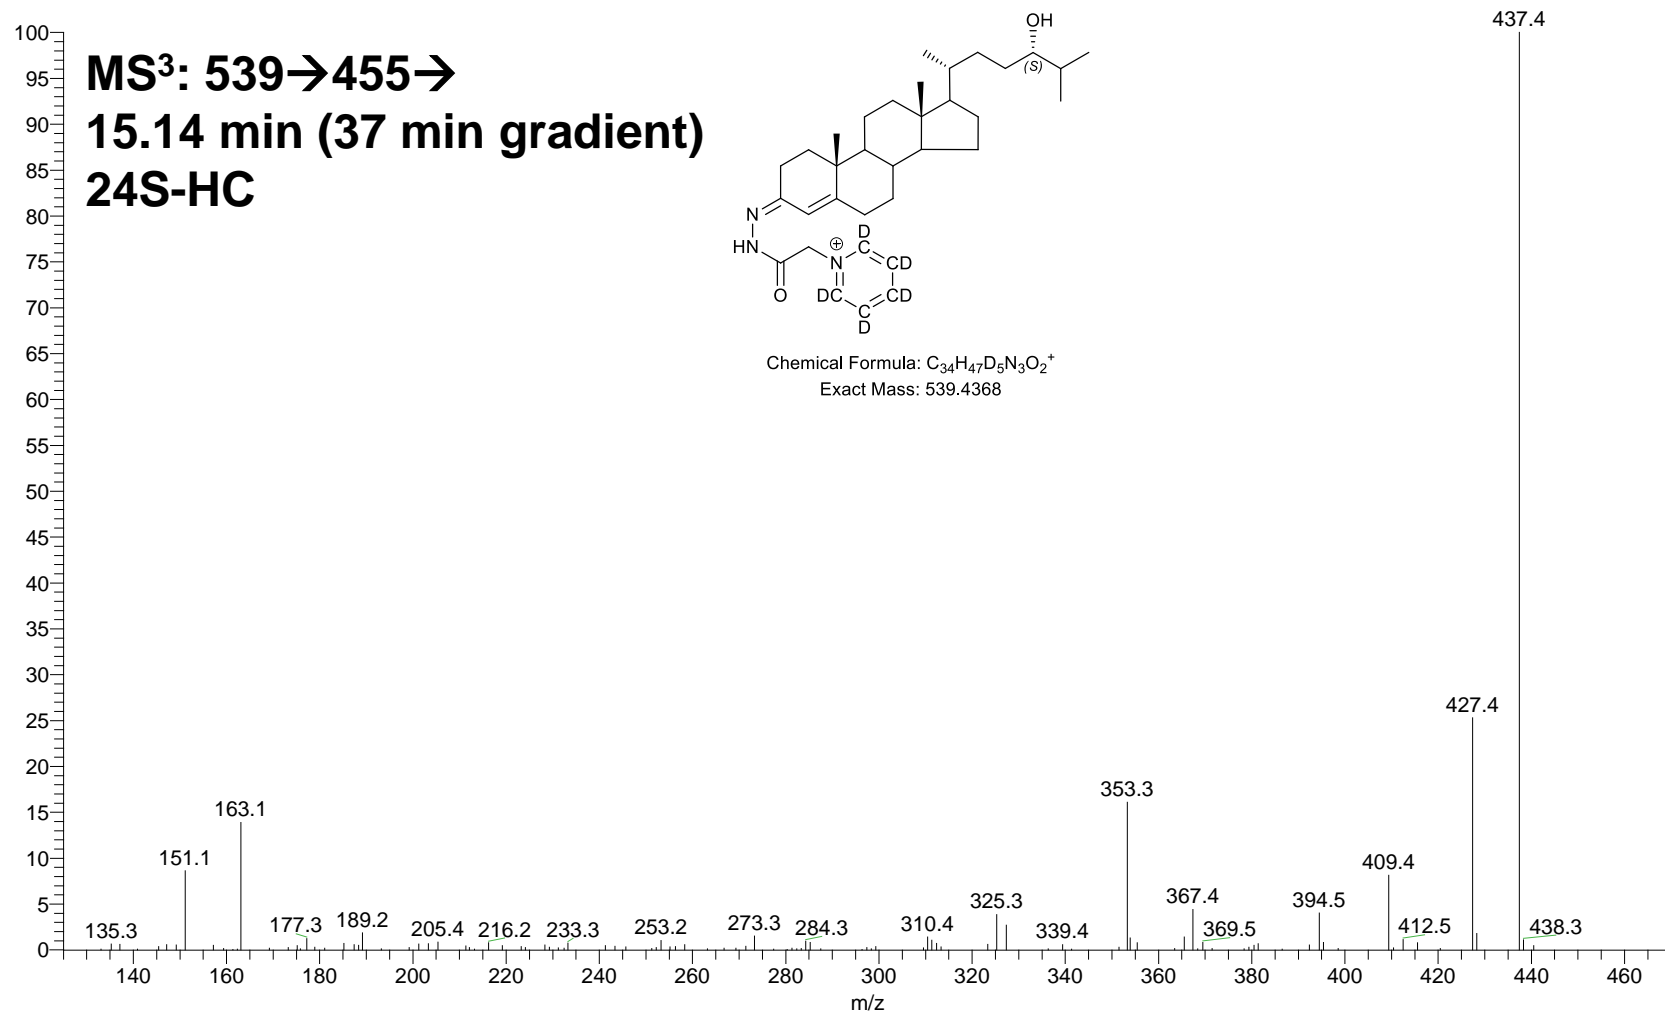

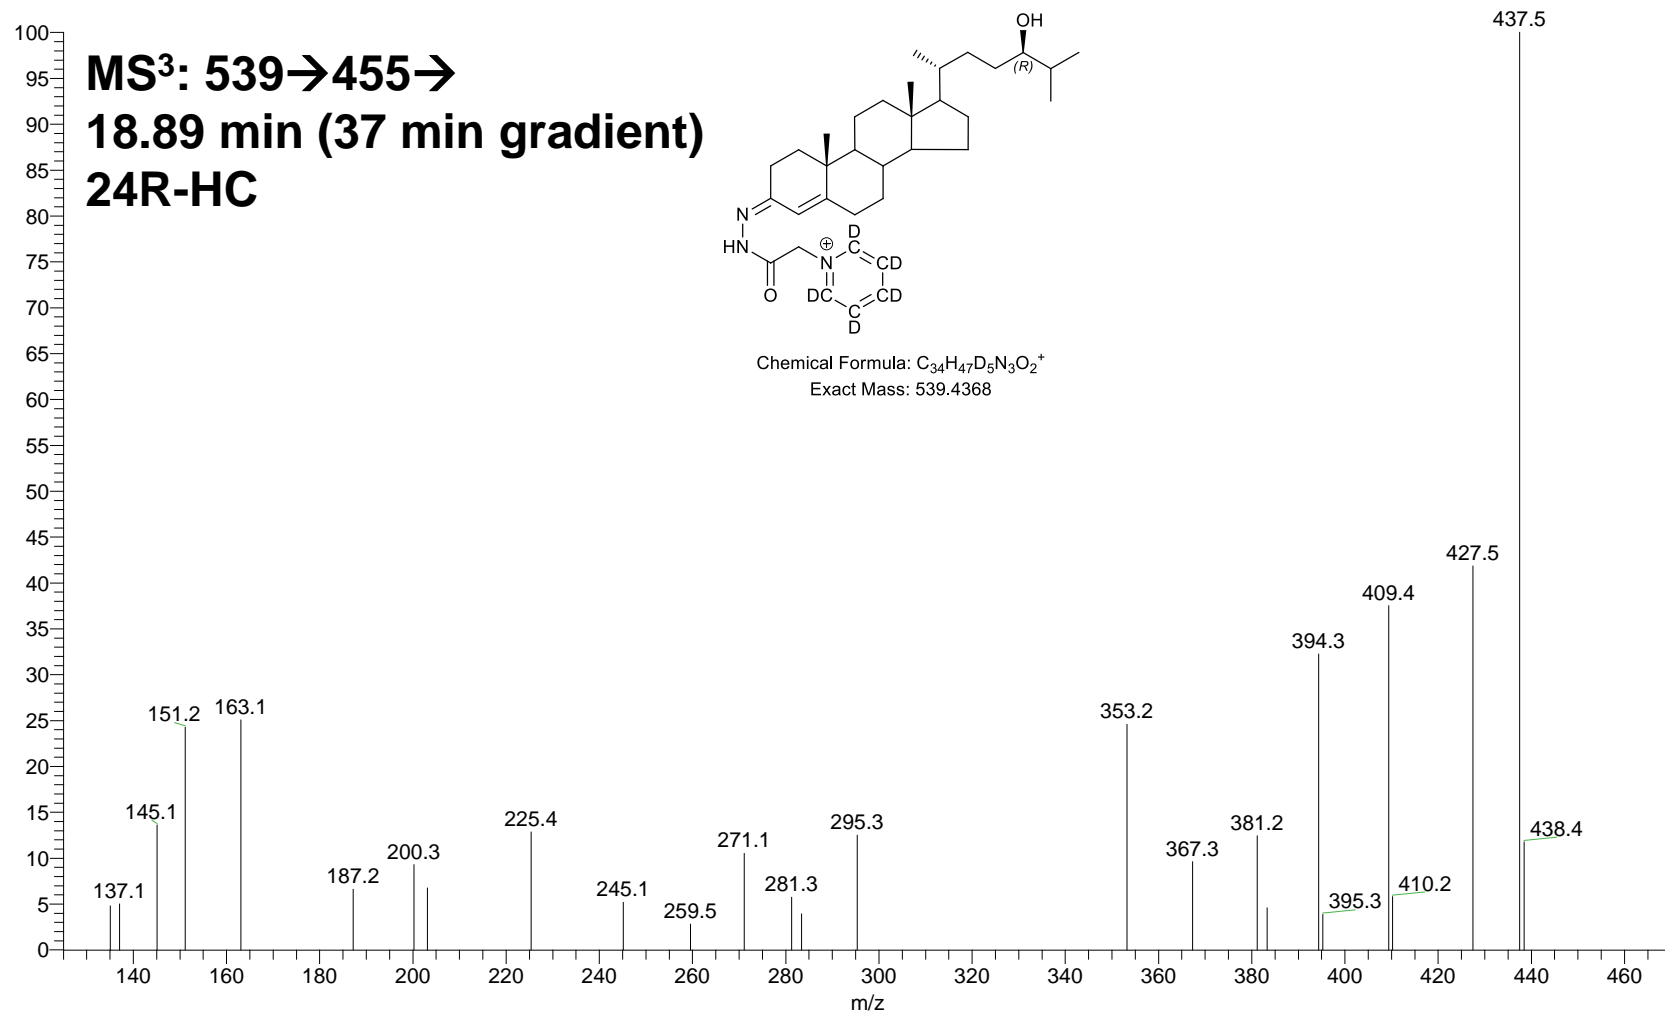

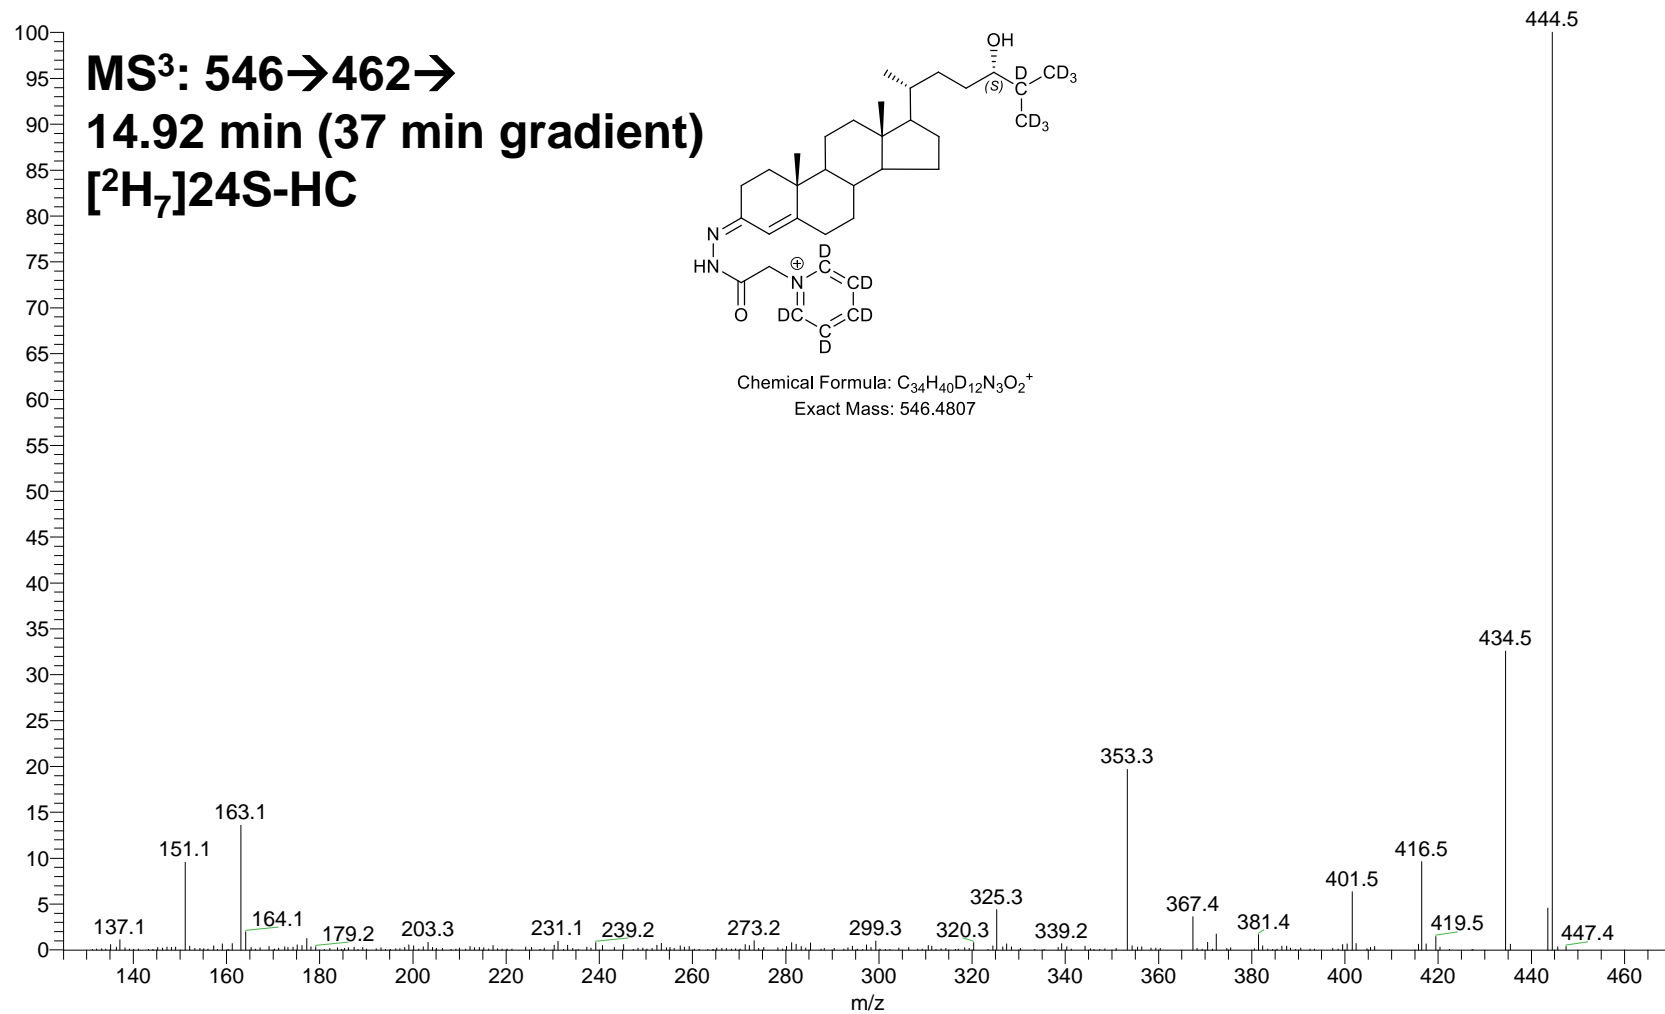

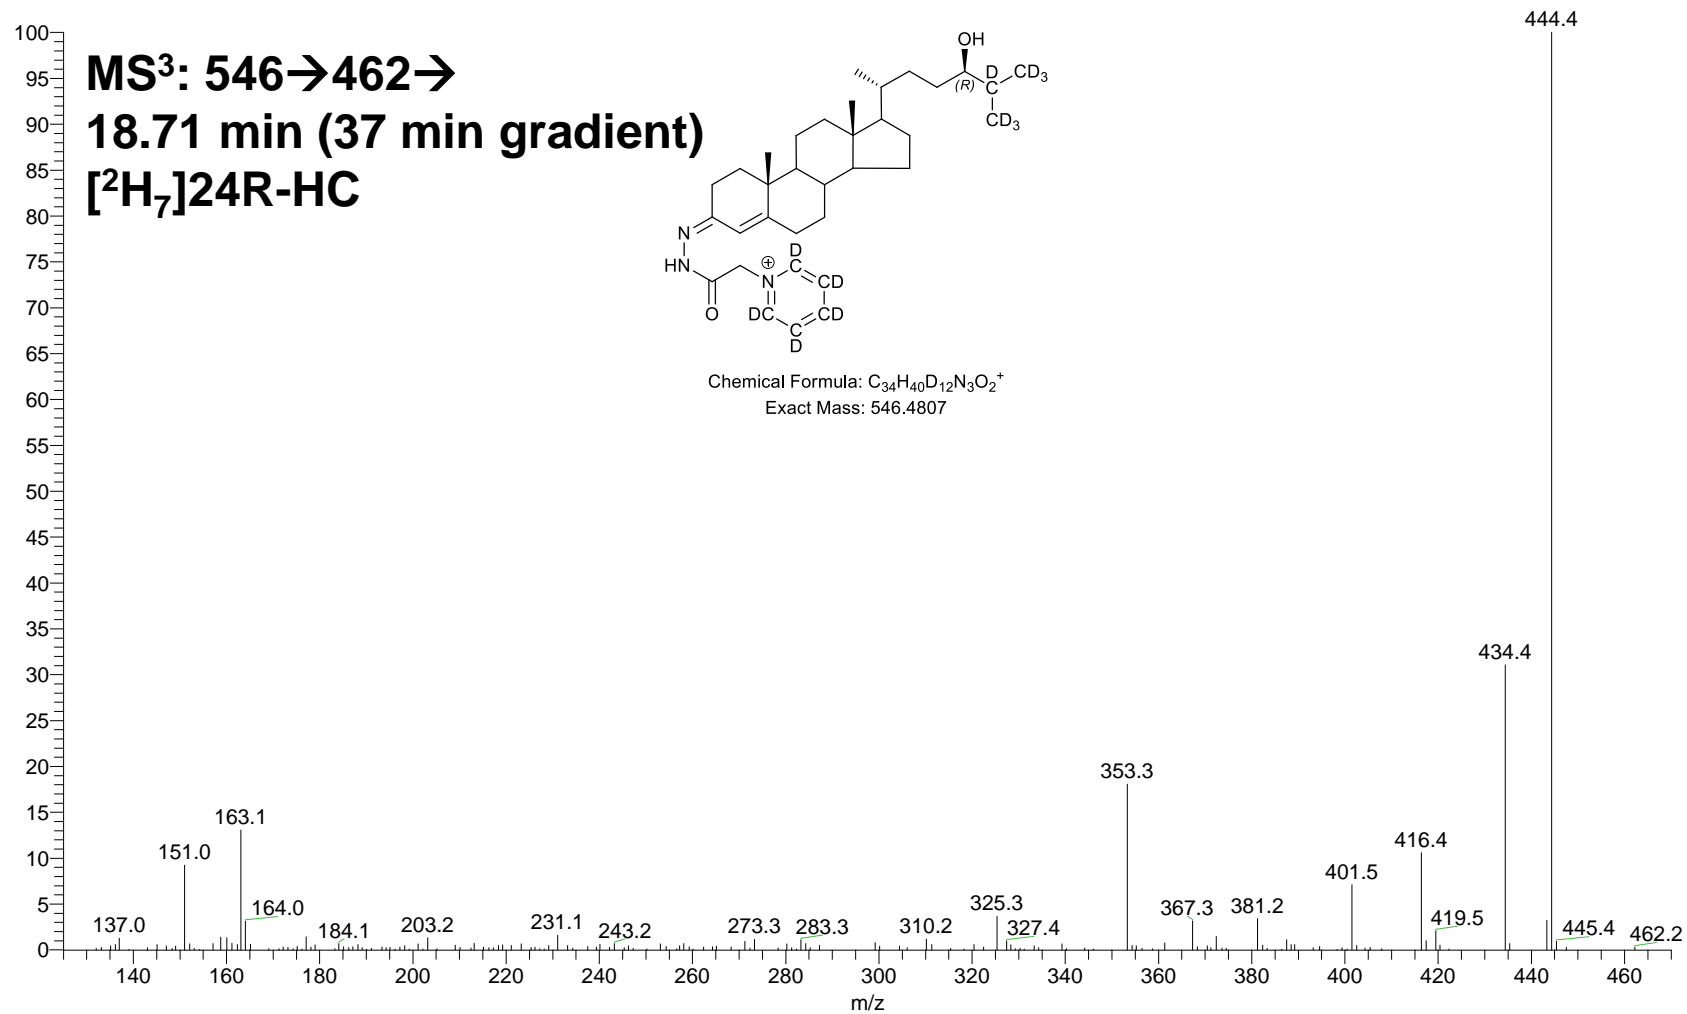

EY\_191014\_100uL-NIST-QC\_100uL-OxySpla... 10/15/19 02:44:12  
100uL NIST (2018) + 100ul OxysterolSPLASH + 10ng 22S-HCO-D7 + 20ug  
EY\_191014\_100uL-NIST-QC\_100uL-OxySplash\_rep2of5\_Fr1A=GPd5\_Fr1E  
F: ITMS + c ESI Full ms3 539.44@cid30.00 455.36@cid35.00 [125.00-550.00]

15.94 AV: 1 NL: 2.08E3

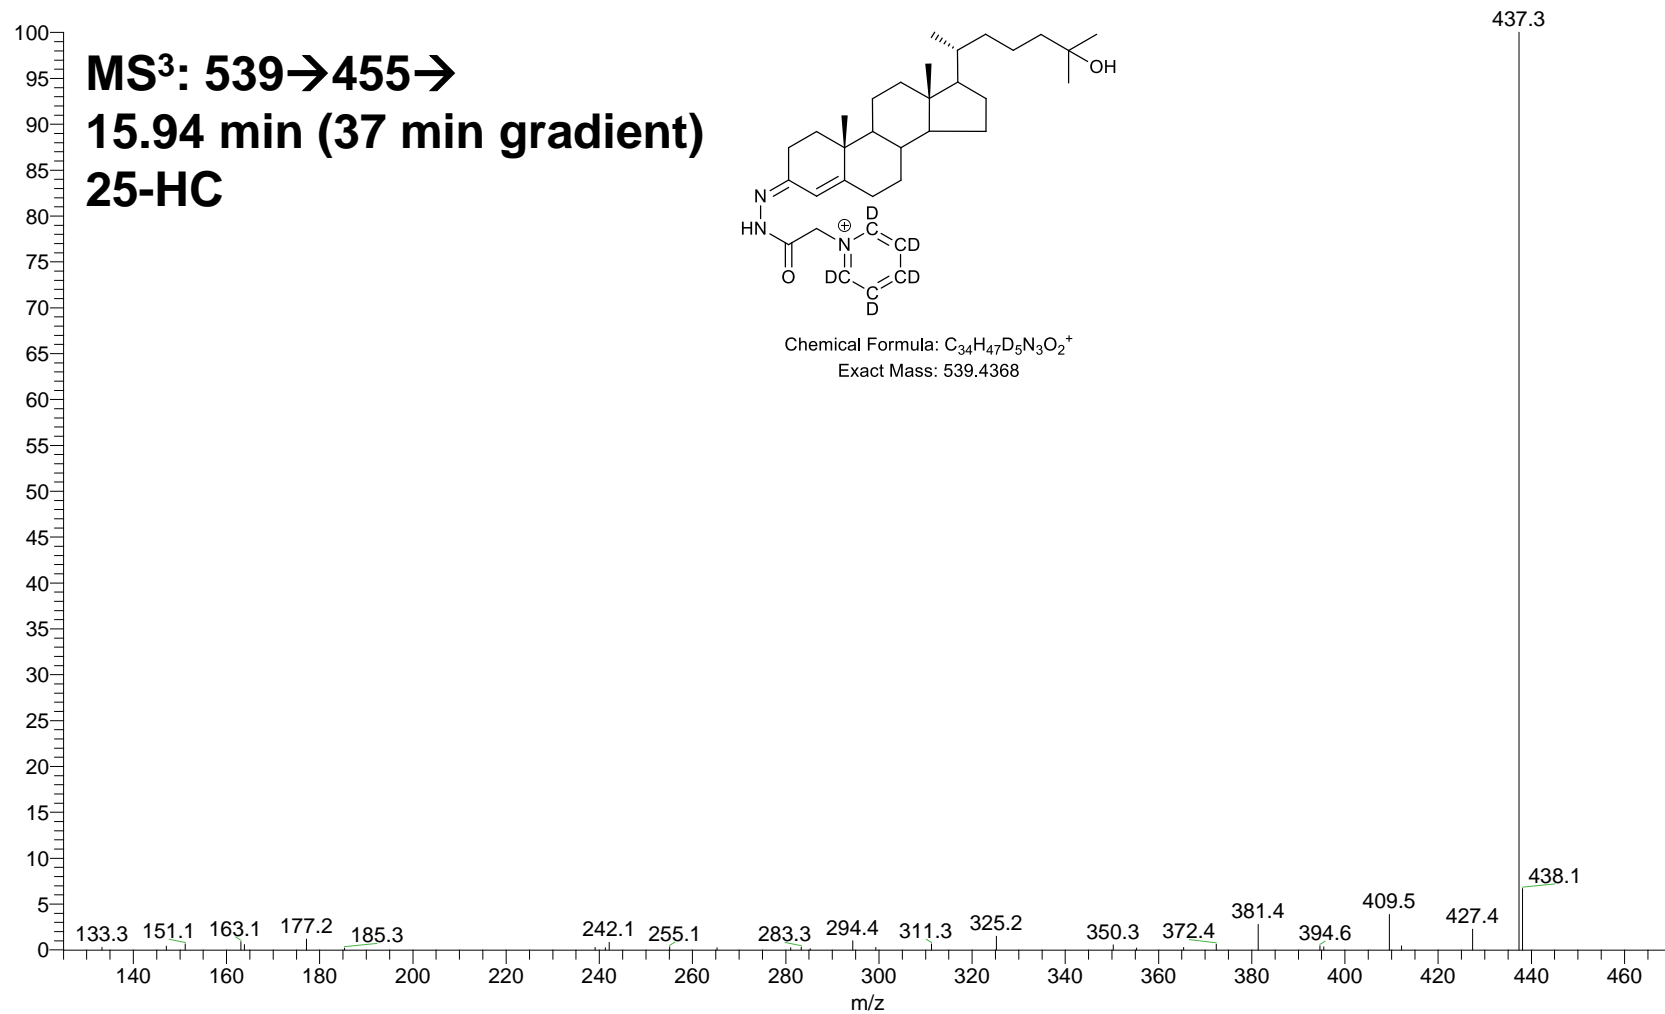



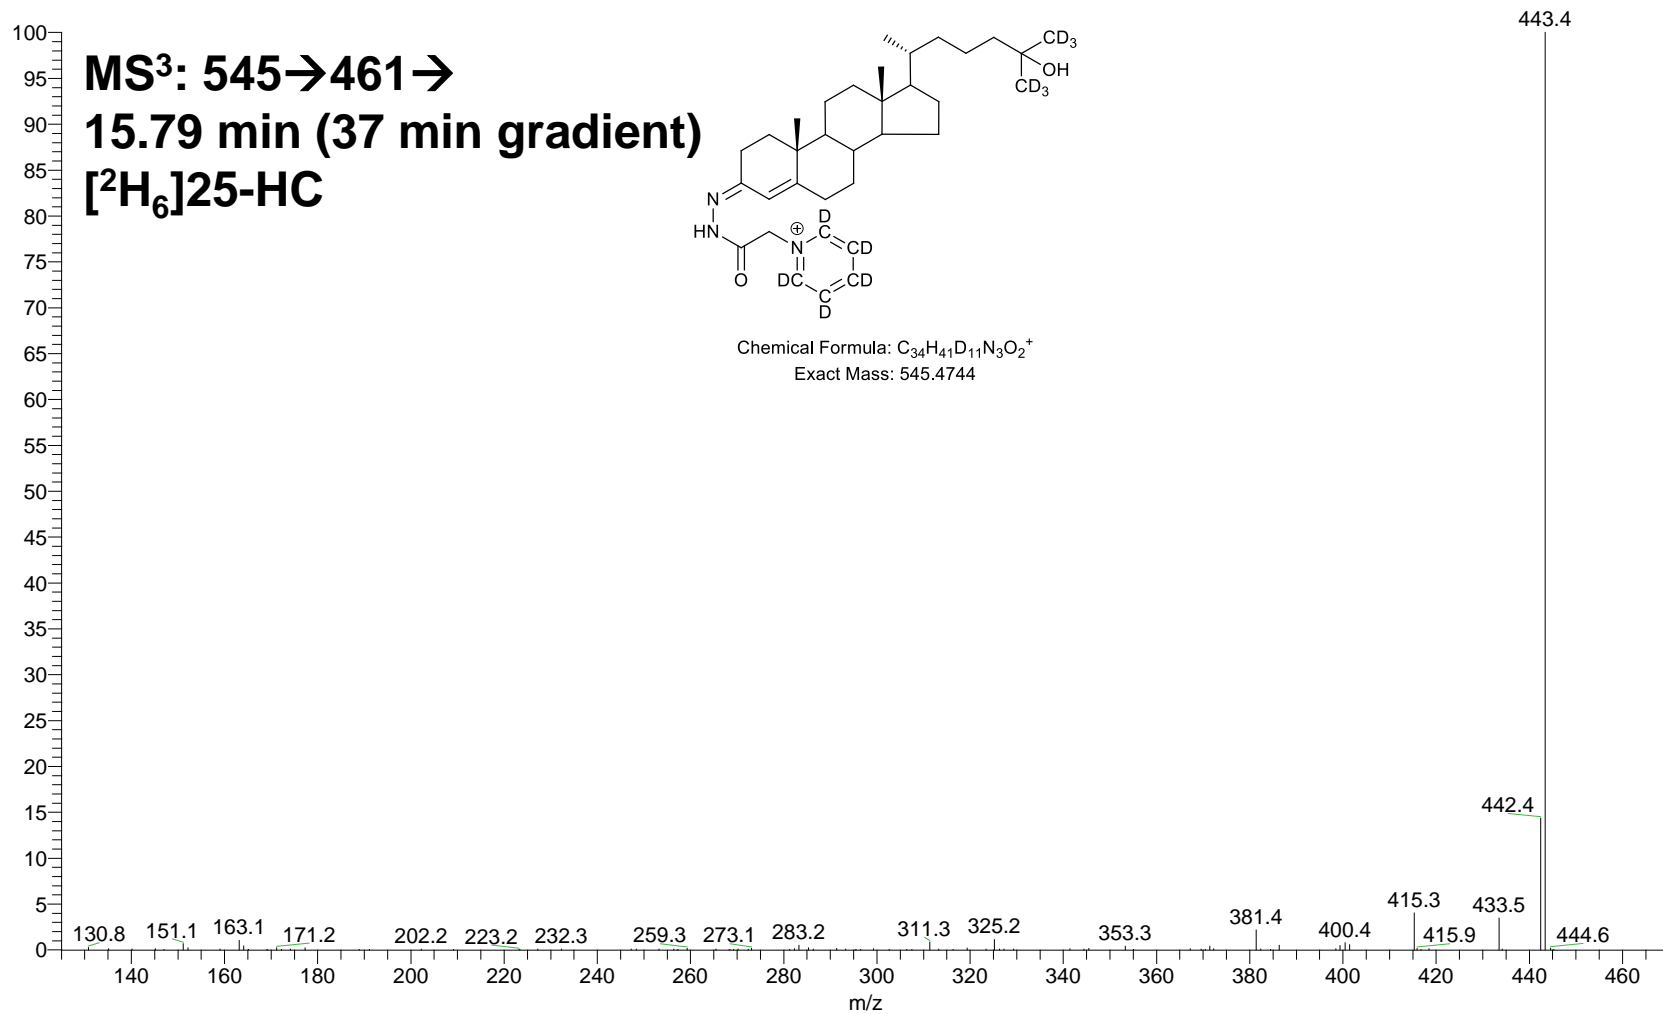

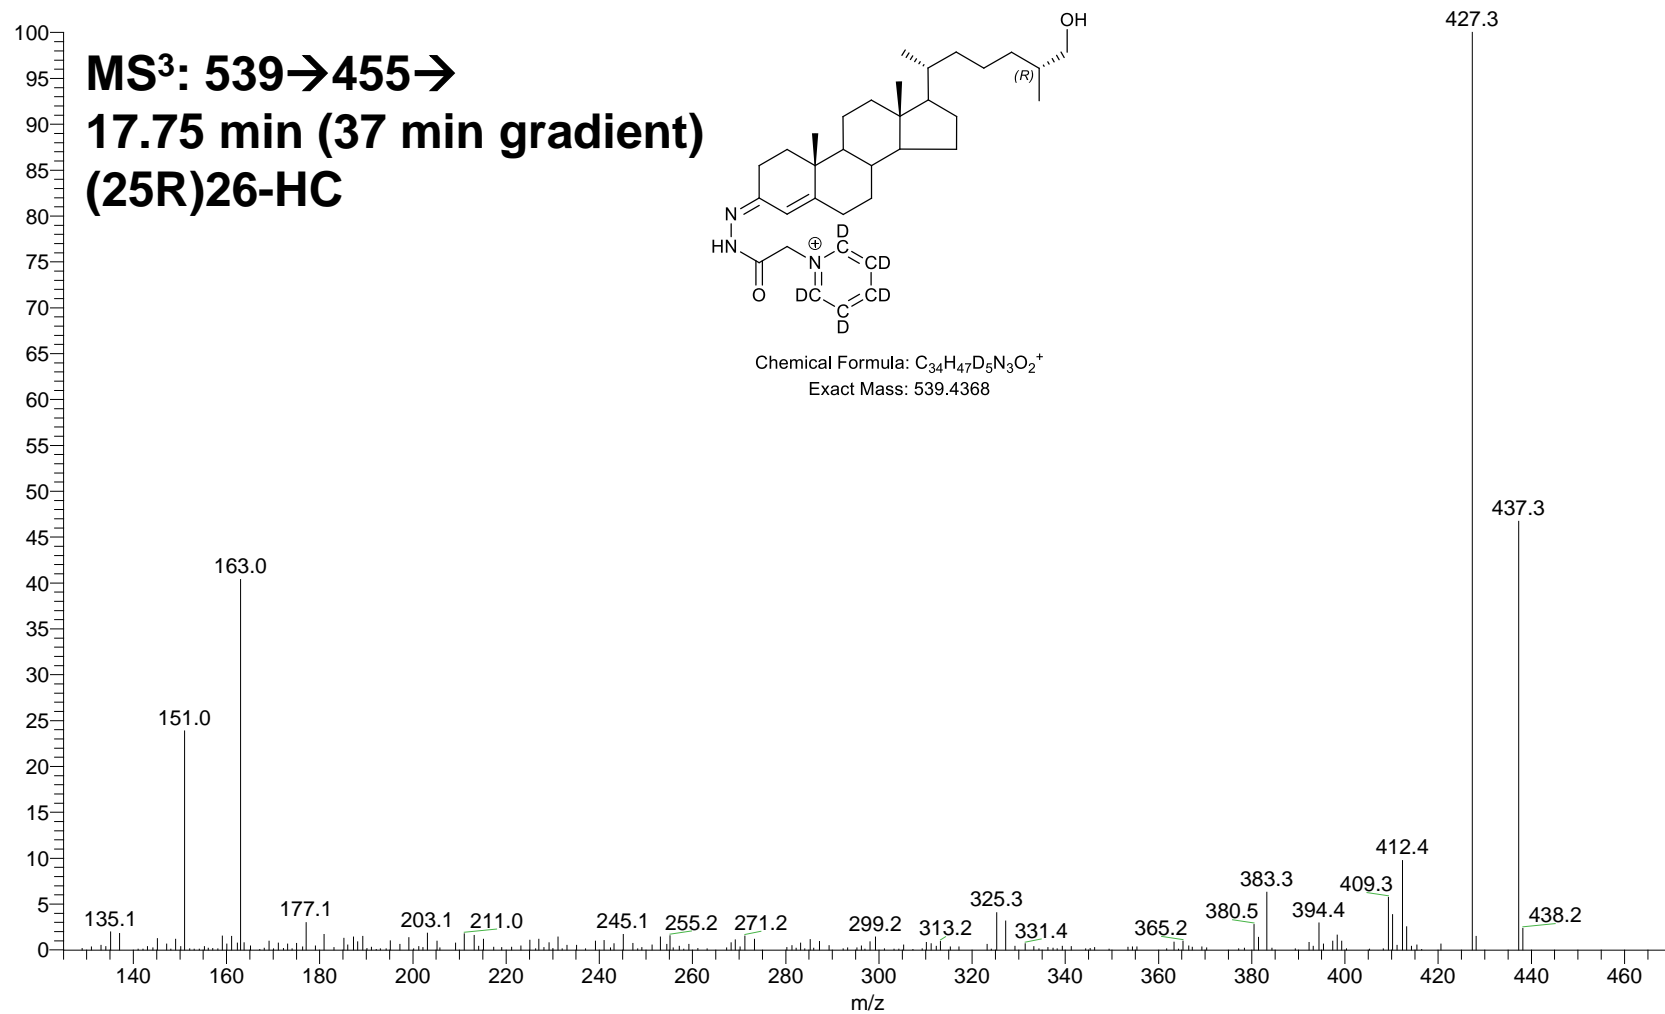

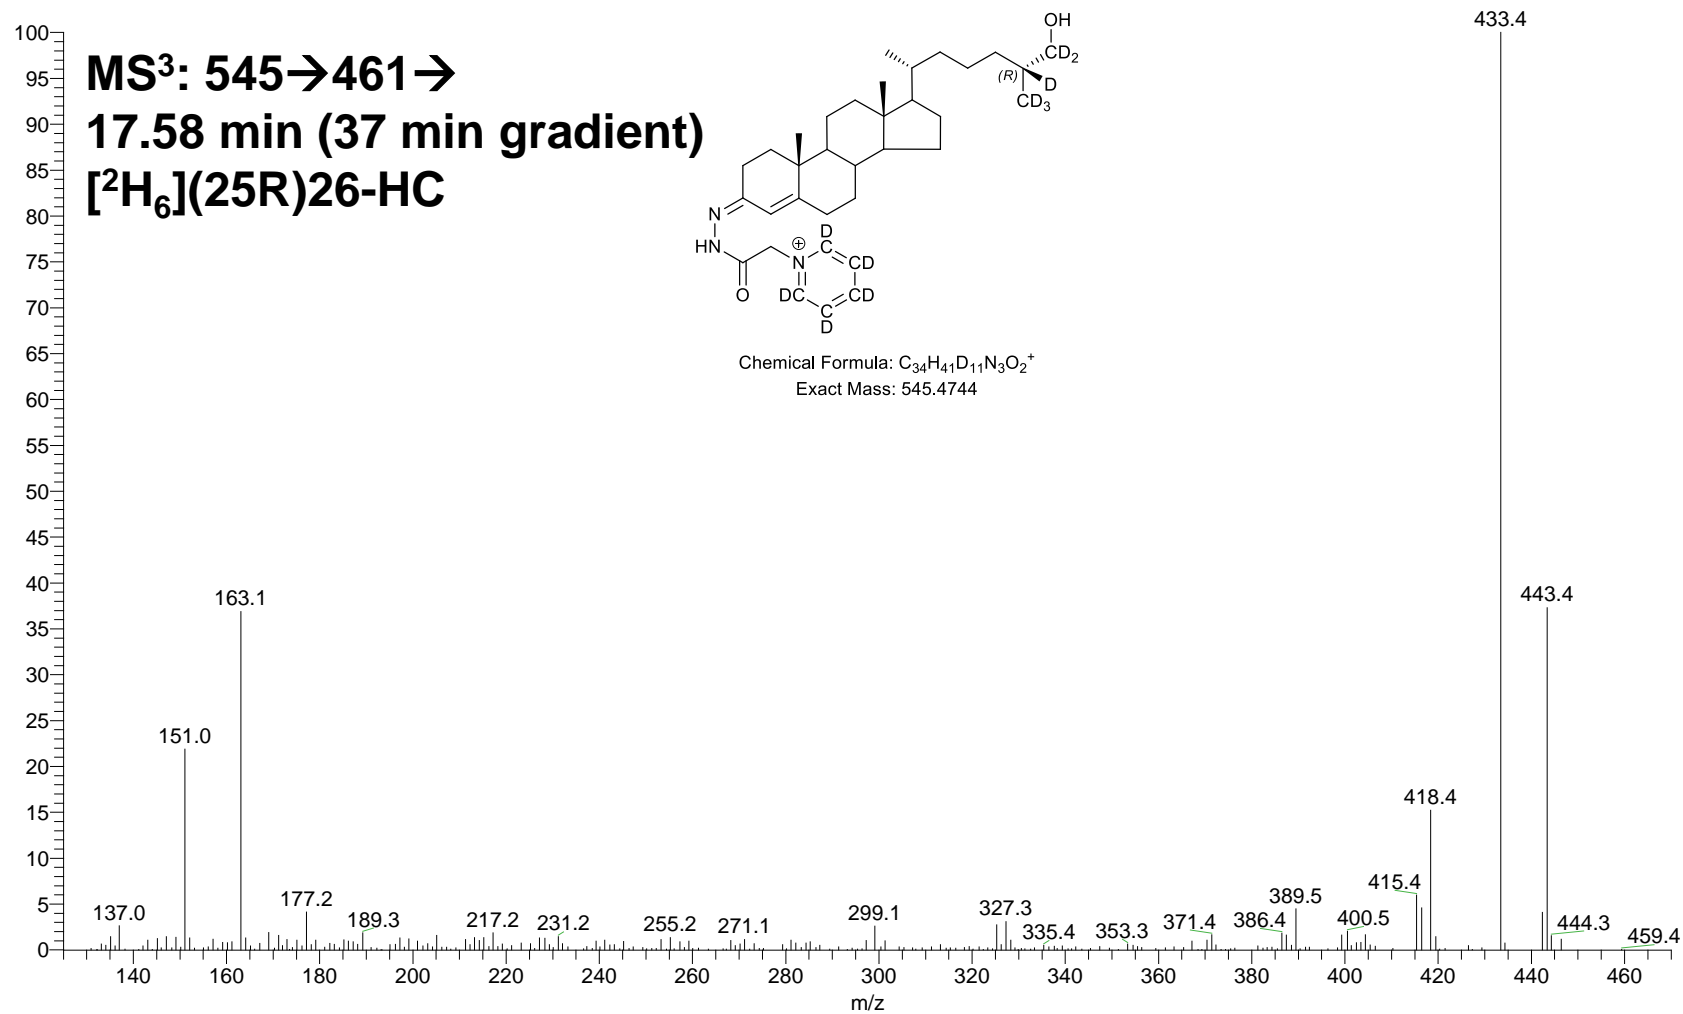

EY\_191014\_100uL-NIST-QC\_100uL-OxySpla... 10/15/19 02:44:12  
100uL NIST (2018) + 100uL OxysterolSPLASH + 10ng 22S-HCO-D7 + 20ug  
EY\_191014\_100uL-NIST-QC\_100uL-OxySplash\_rep2of5\_Fr1A=GPd5\_Fr1E  
F: ITMS + c ESI Full ms3 546.48@cid30.00 462.41@cid35.00 [125.00-555.00]

7.86 AV: 1 NL: 1.28E3

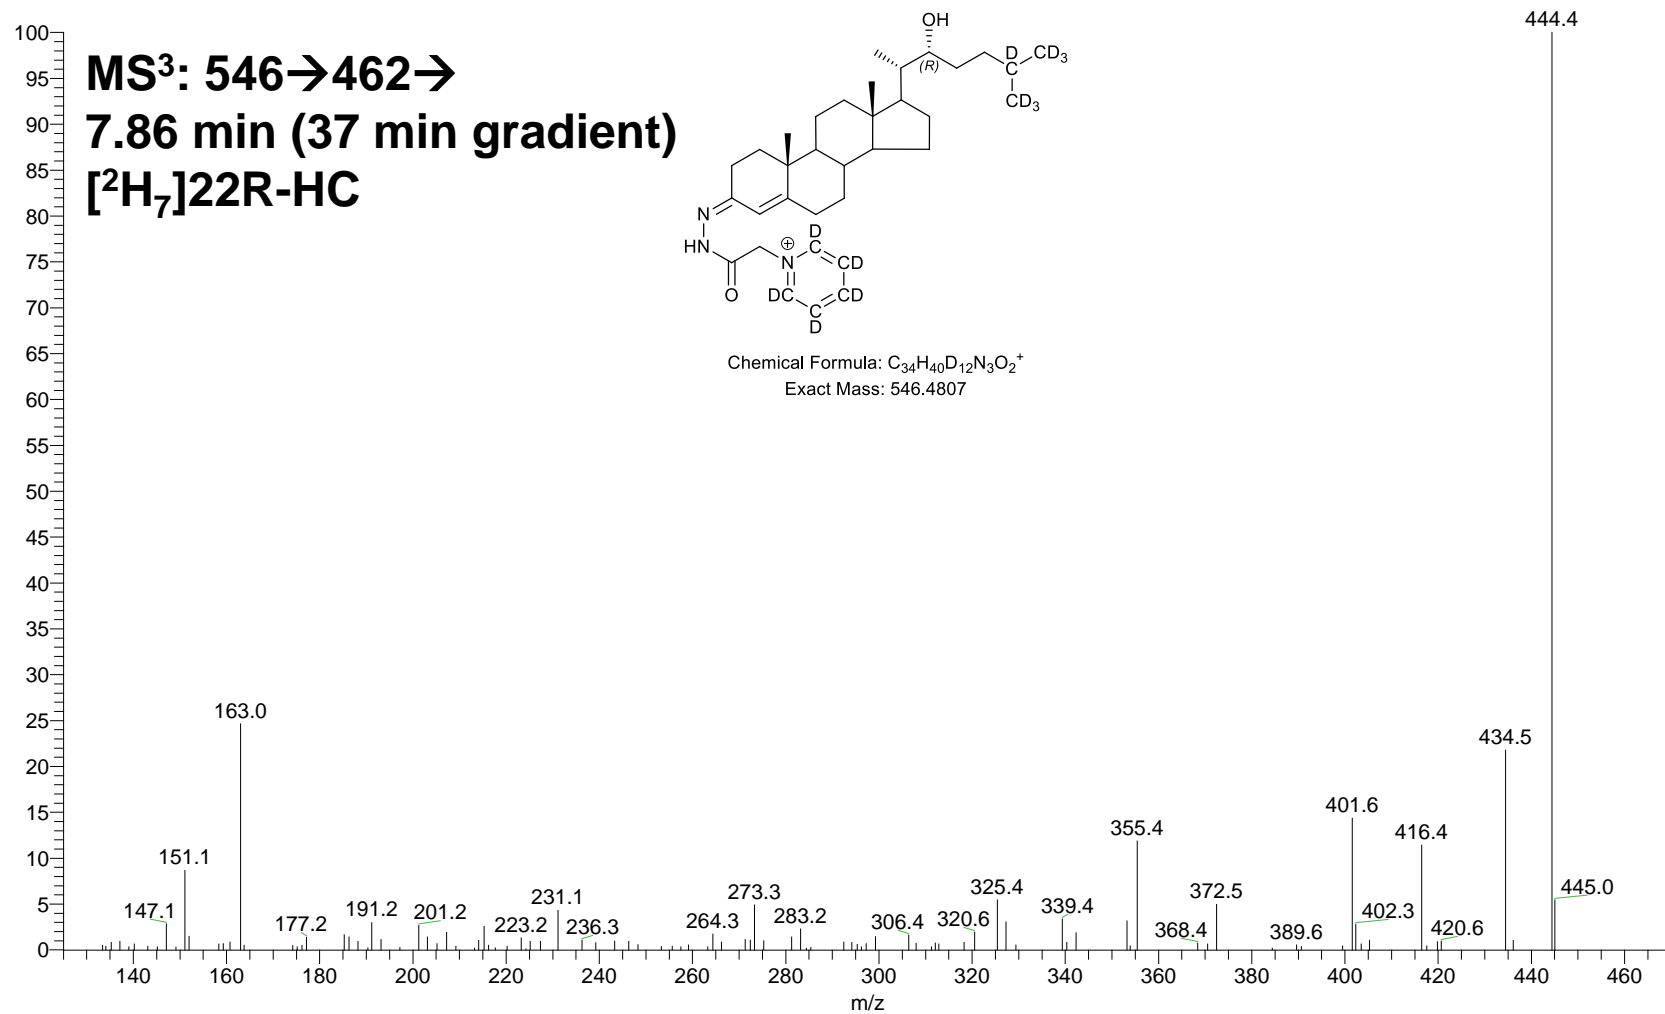

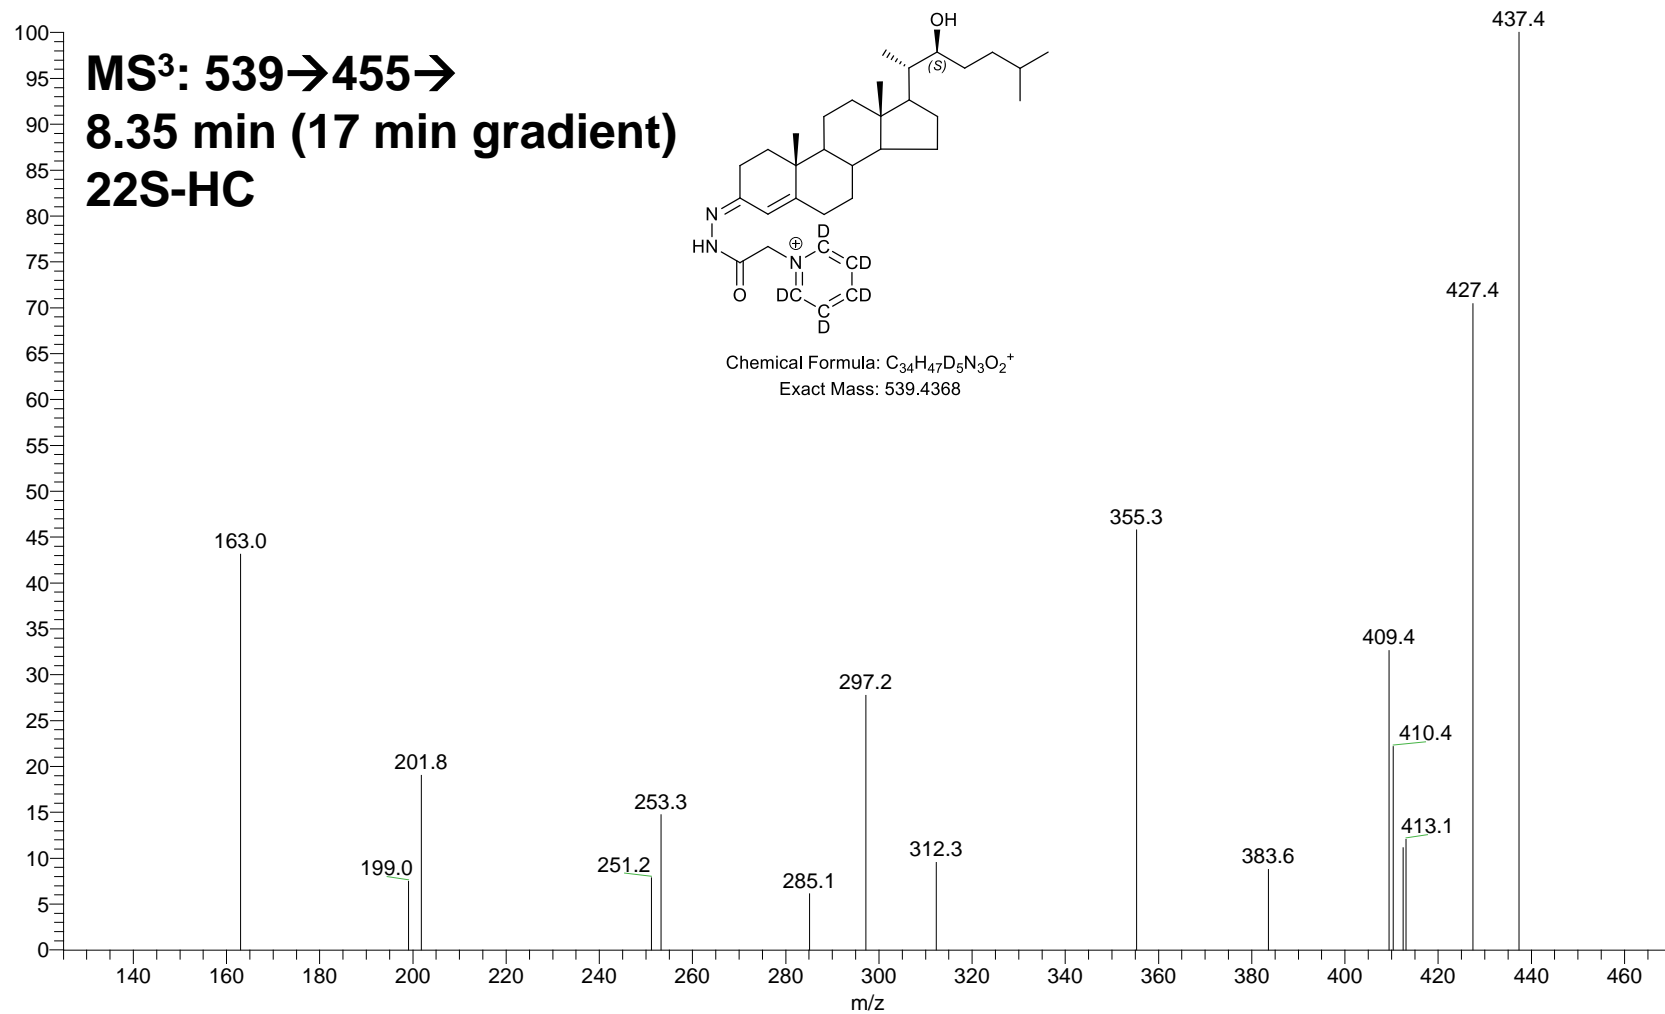

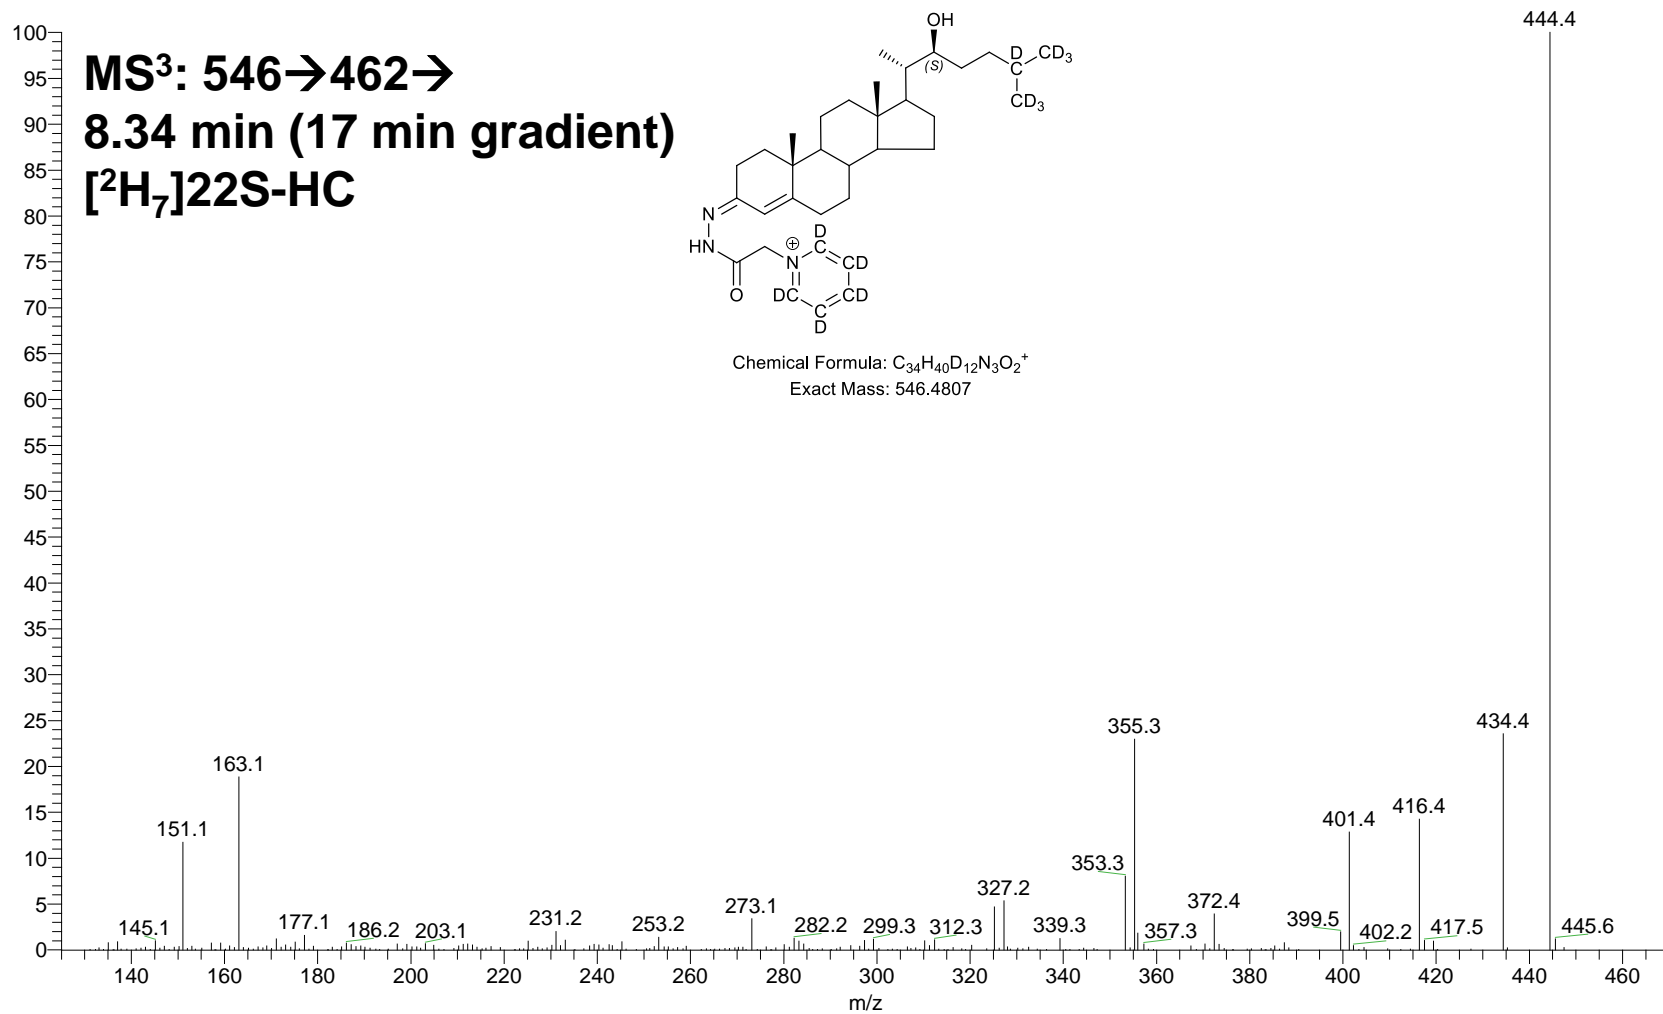

**MS<sup>3</sup>: 545→461→**  
**18.35 min (37 min gradient)**  
**[<sup>2</sup>H<sub>6</sub>](25R)26-HC**

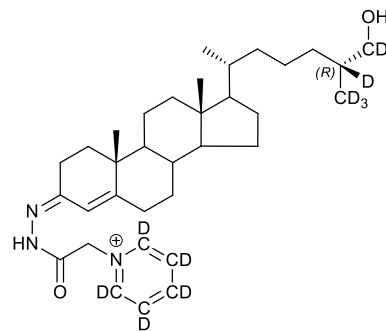

Chemical Formula: C<sub>34</sub>H<sub>41</sub>D<sub>11</sub>N<sub>3</sub>O<sub>2</sub><sup>+</sup>  
Exact Mass: 545.4744

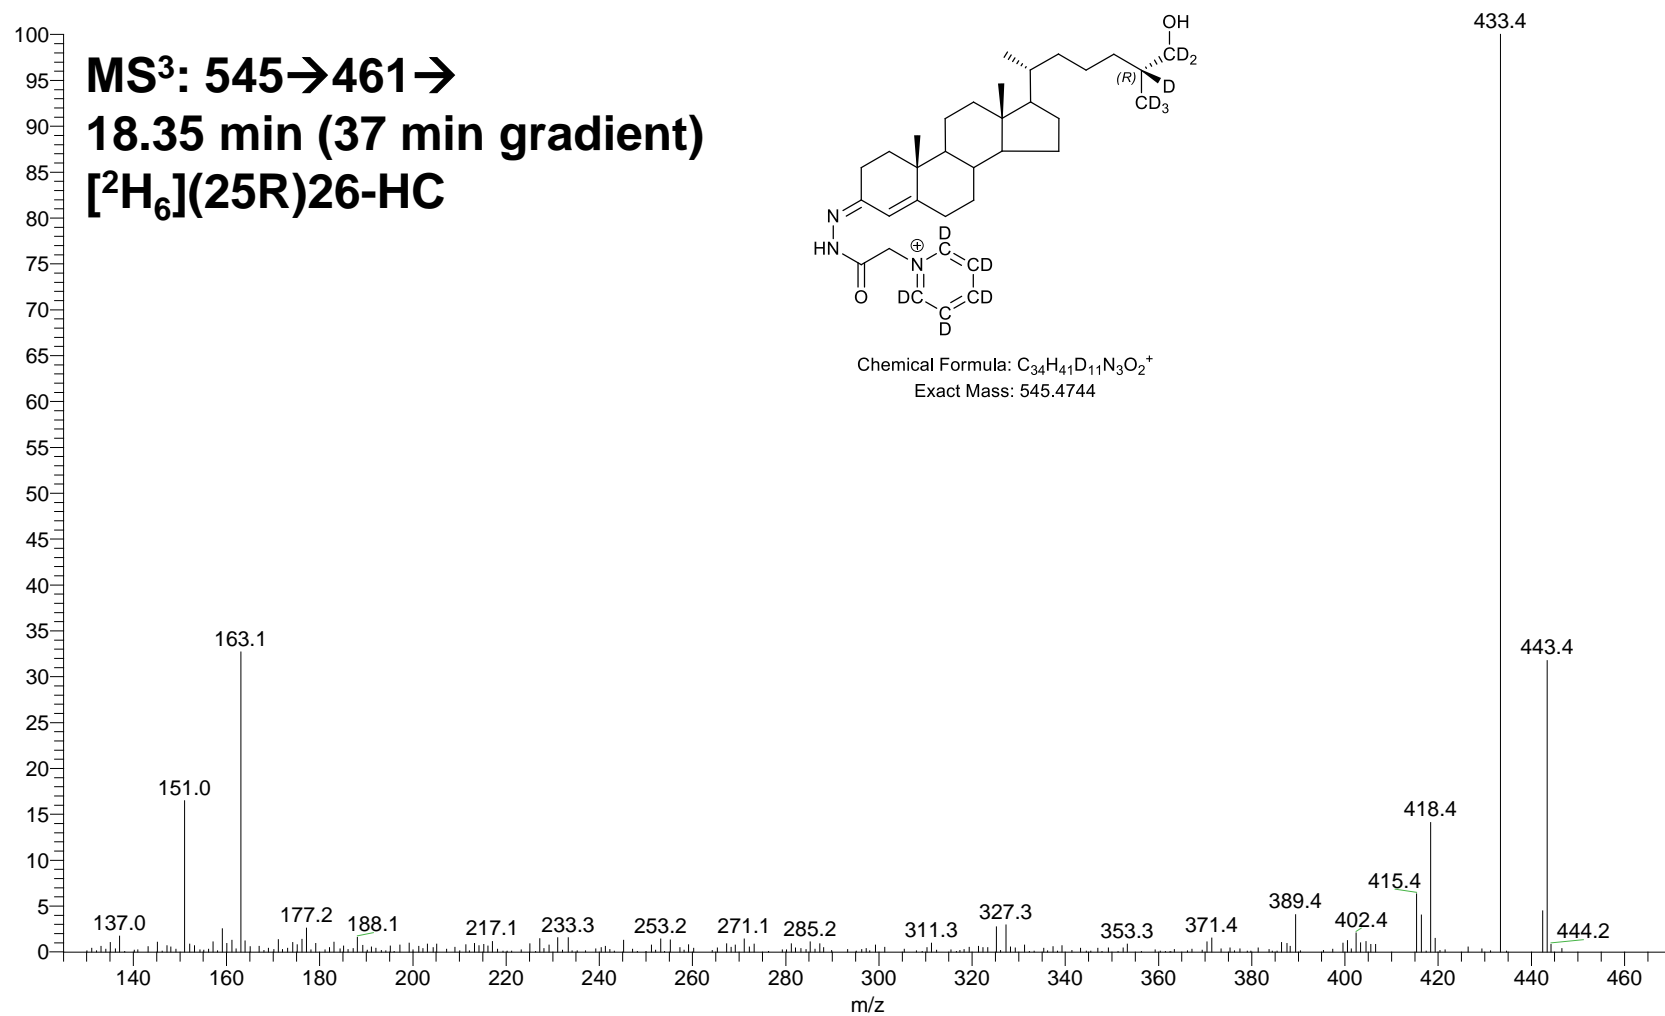

Figure S4A

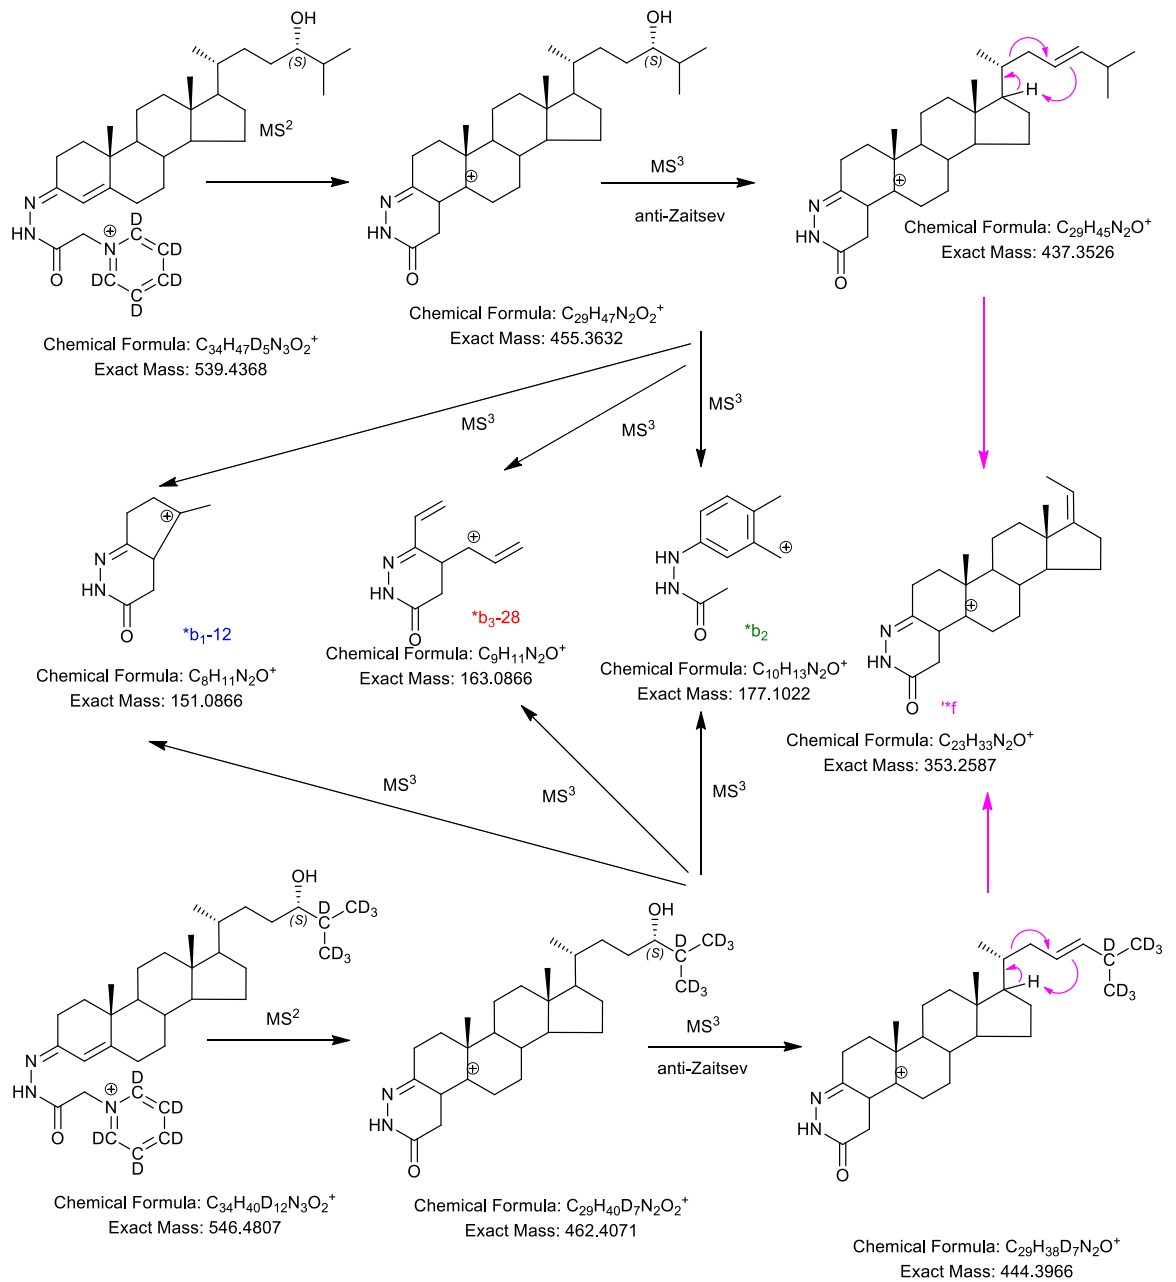



Figure S4B

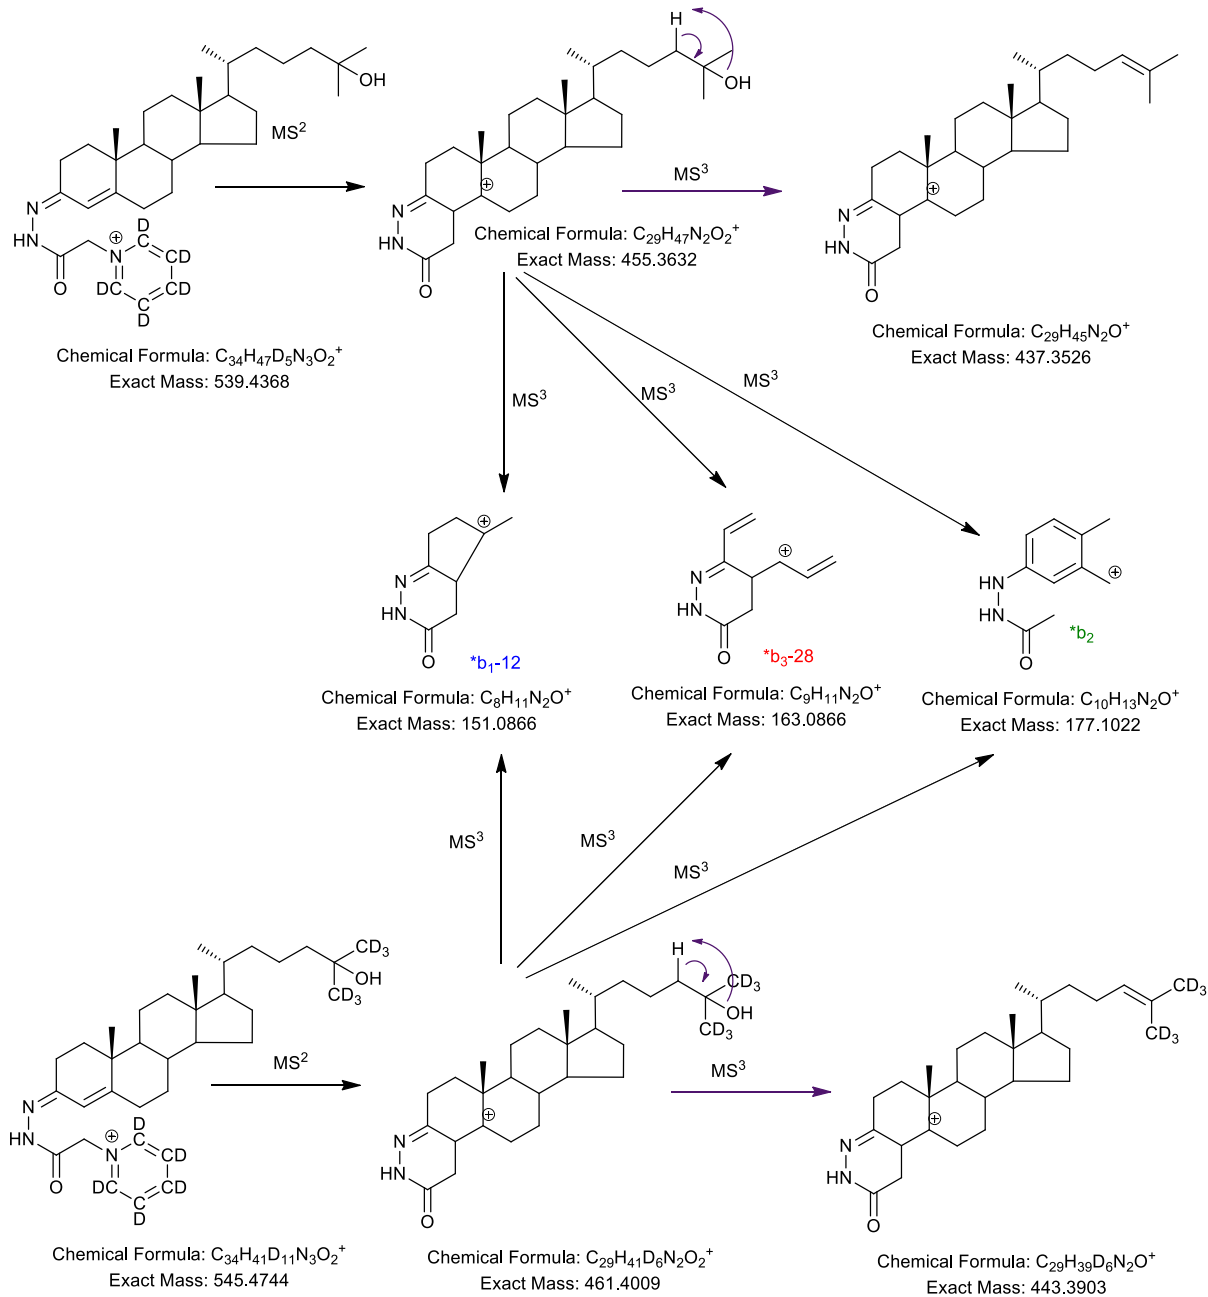

Figure S4C

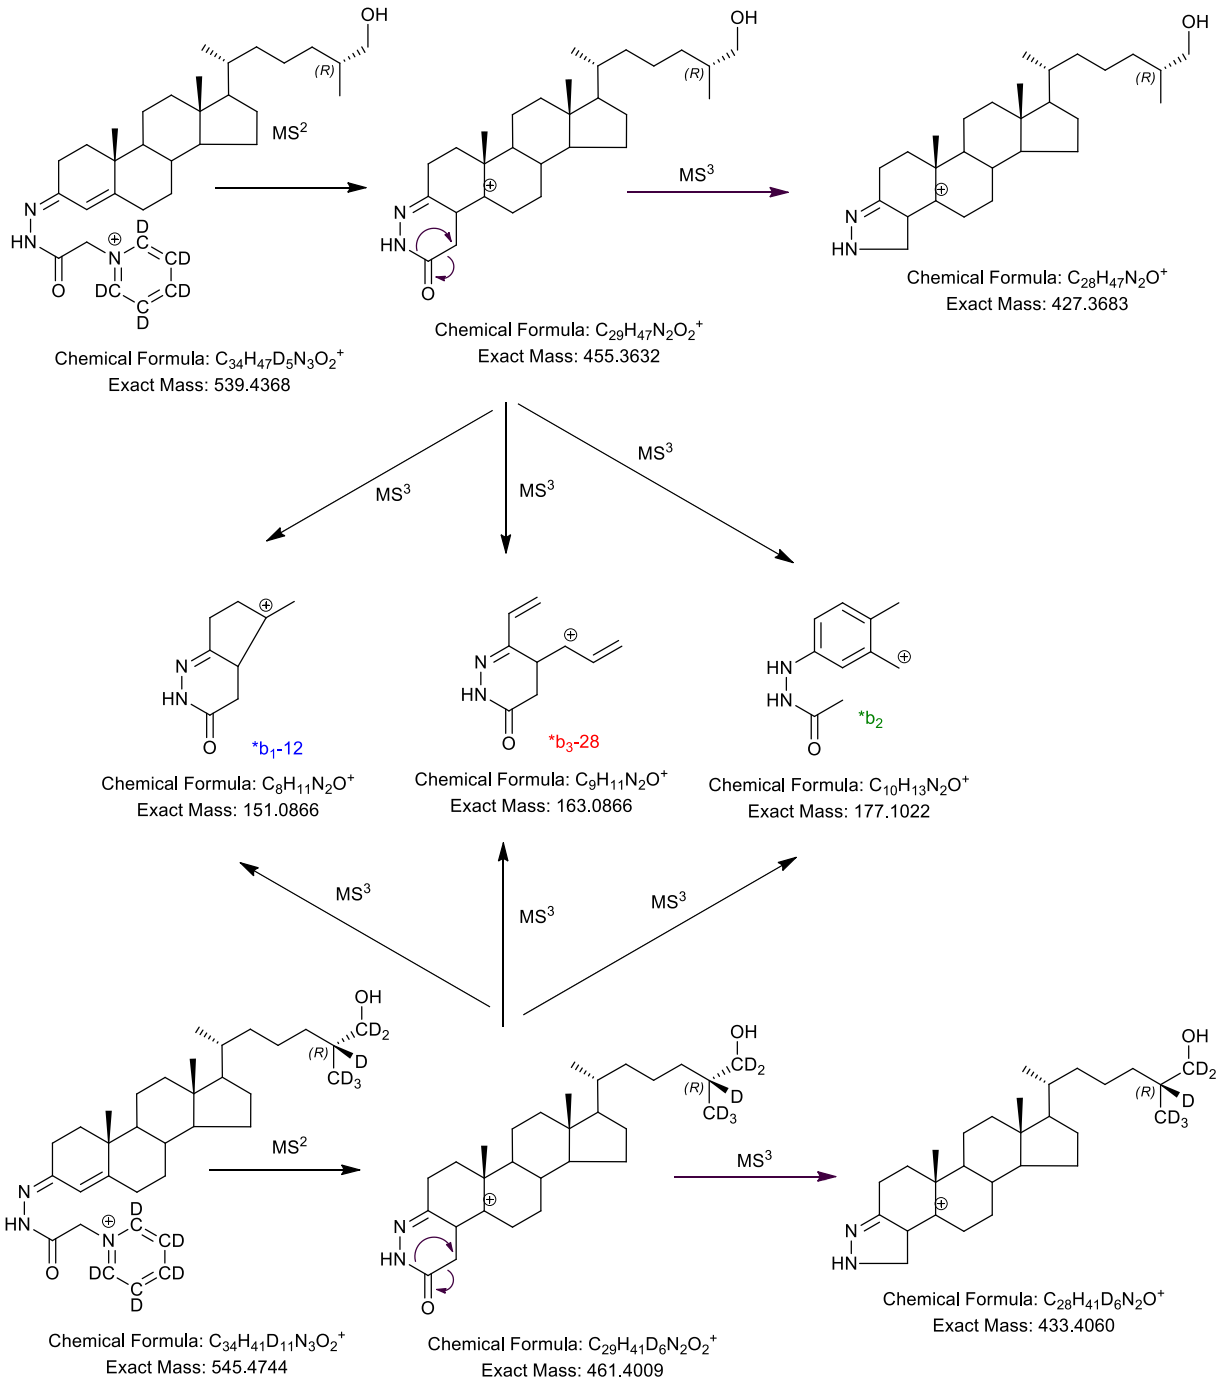

Figure 4D

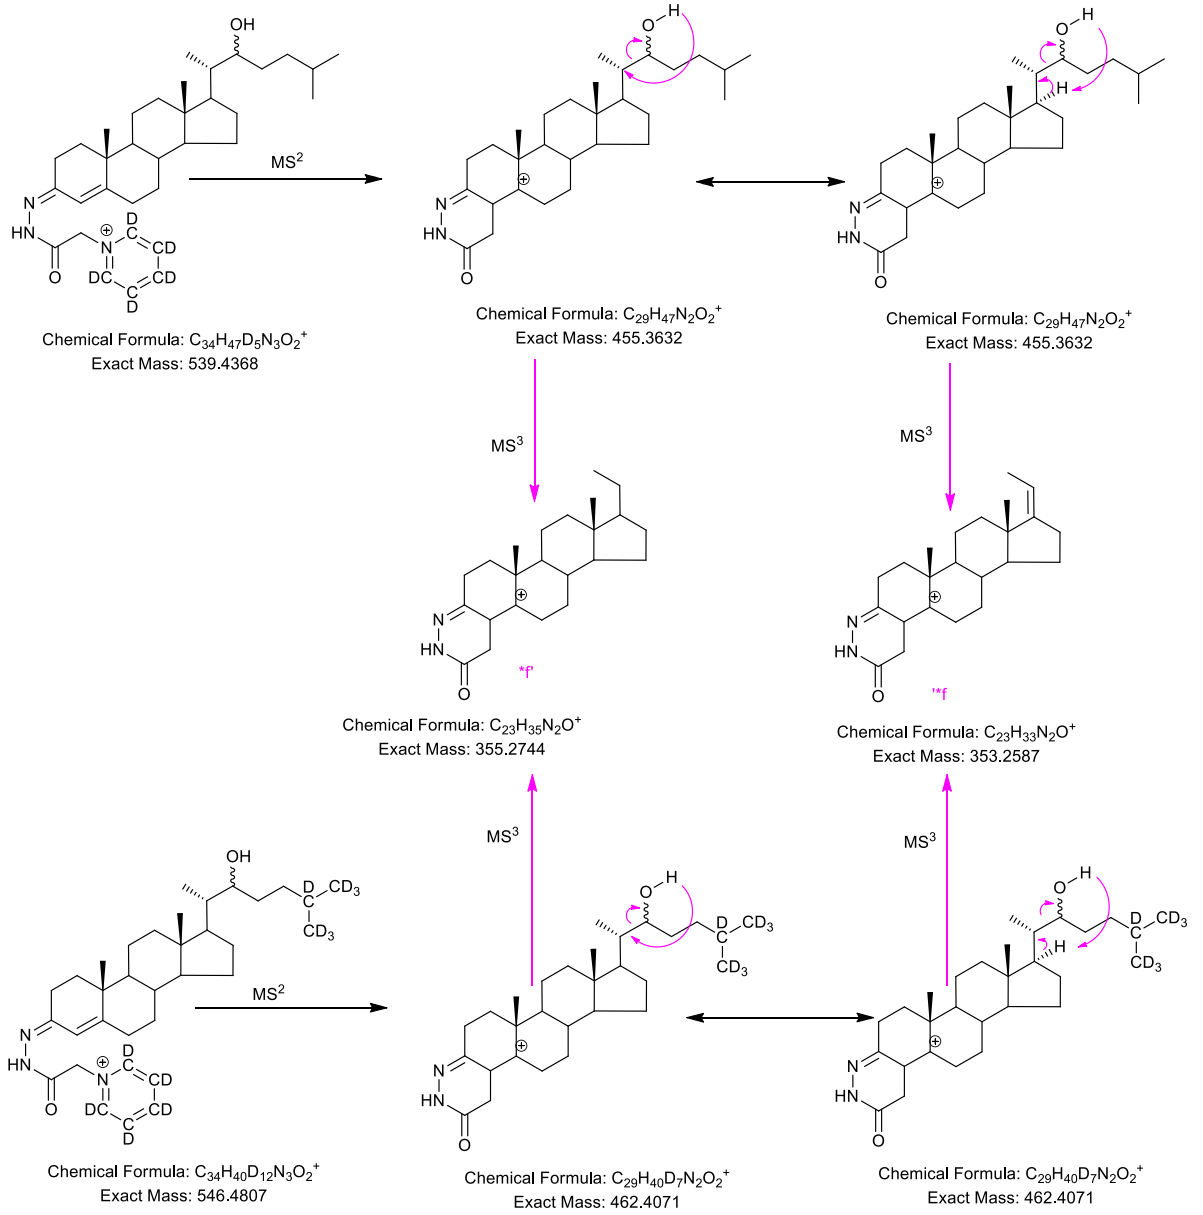

Figure S4E

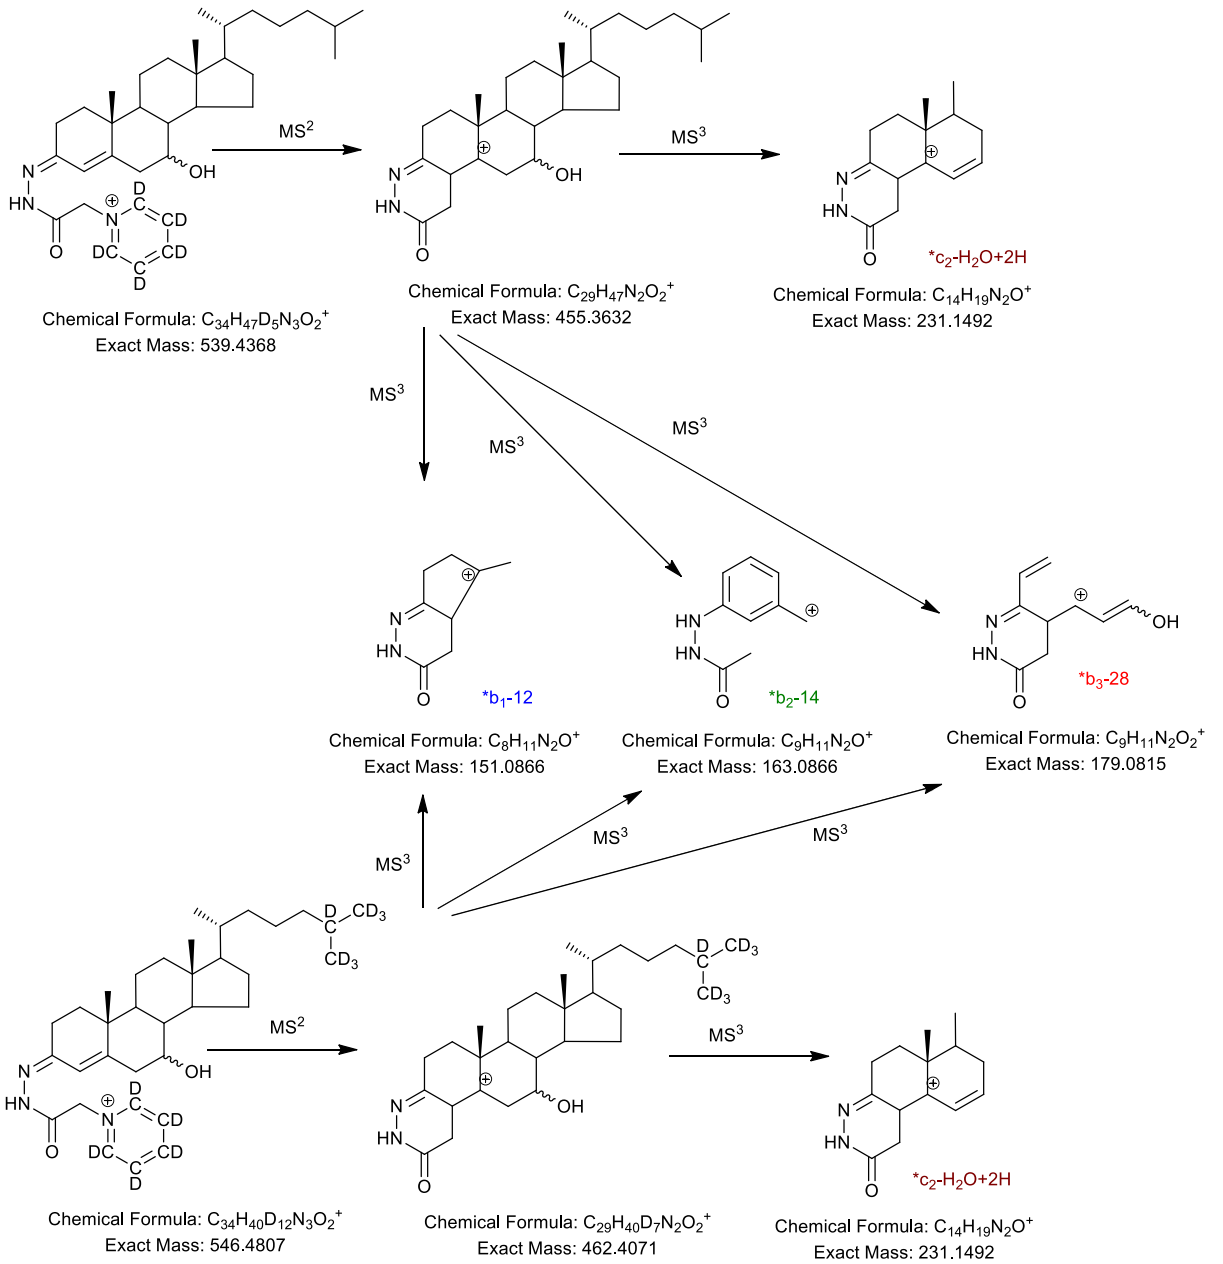

Figure S4F

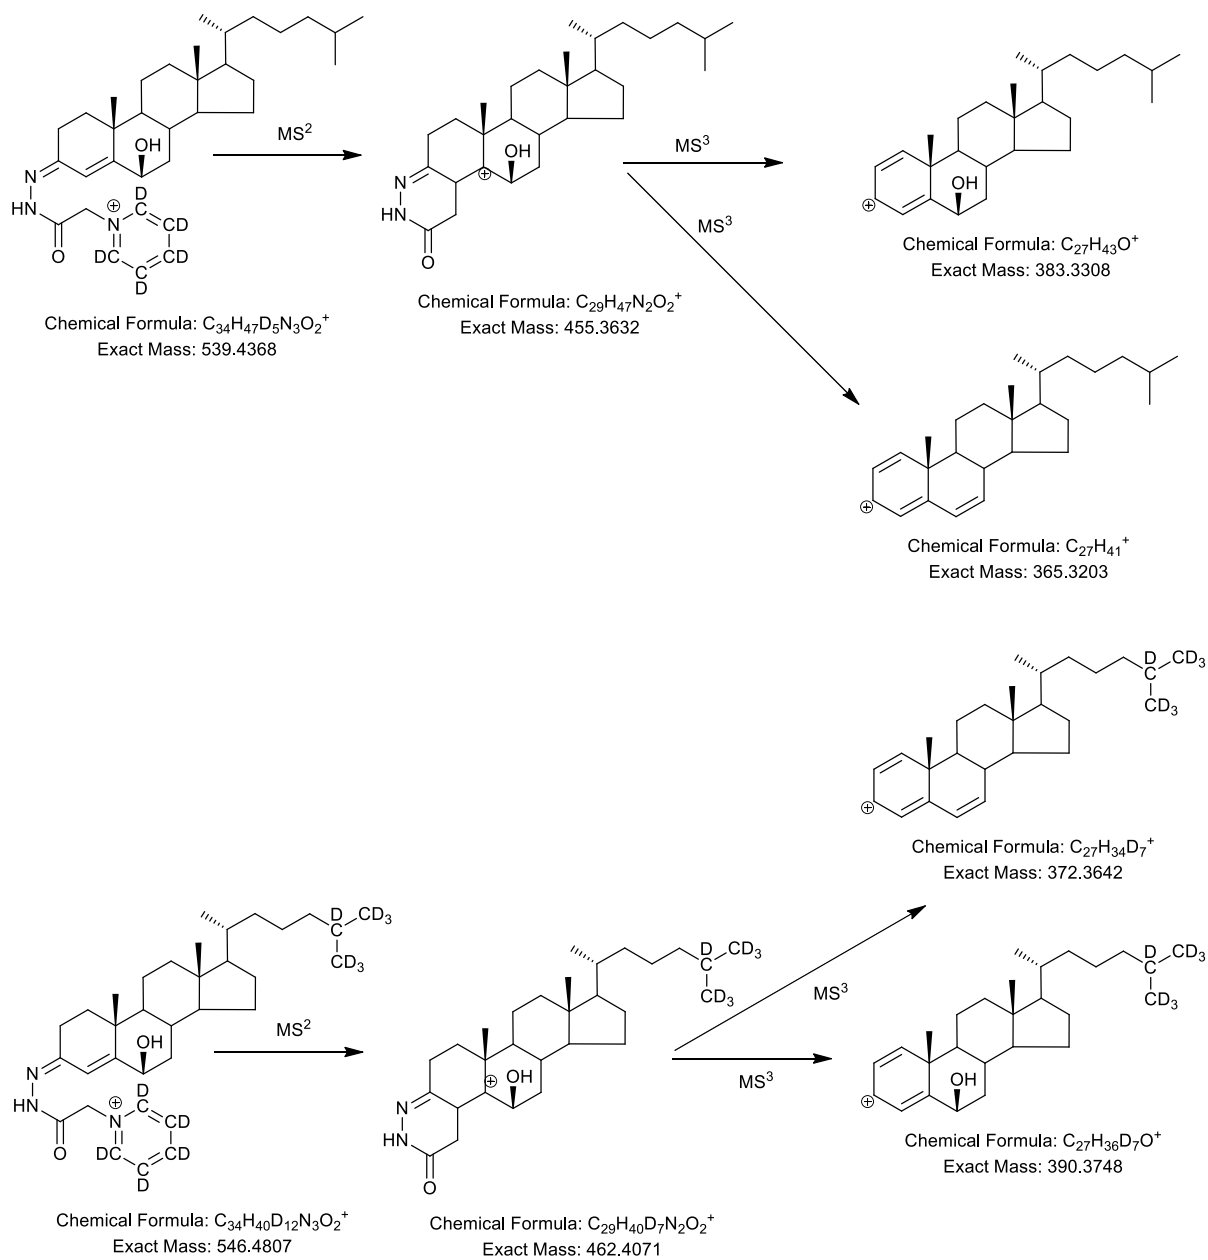

Figure S4G

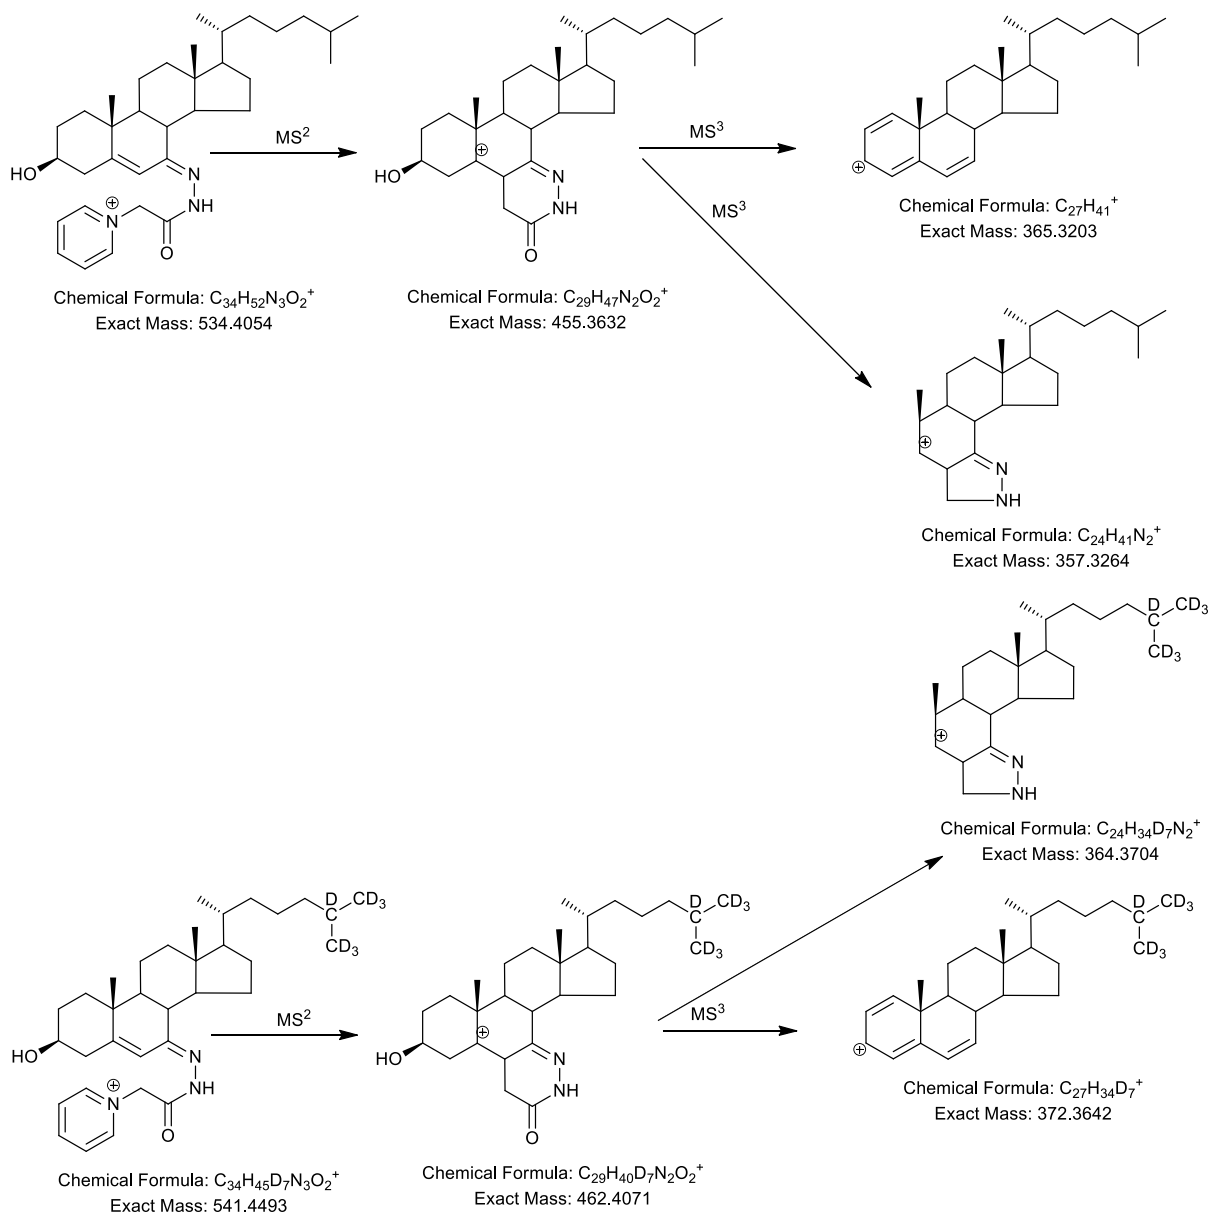



Figure S4I

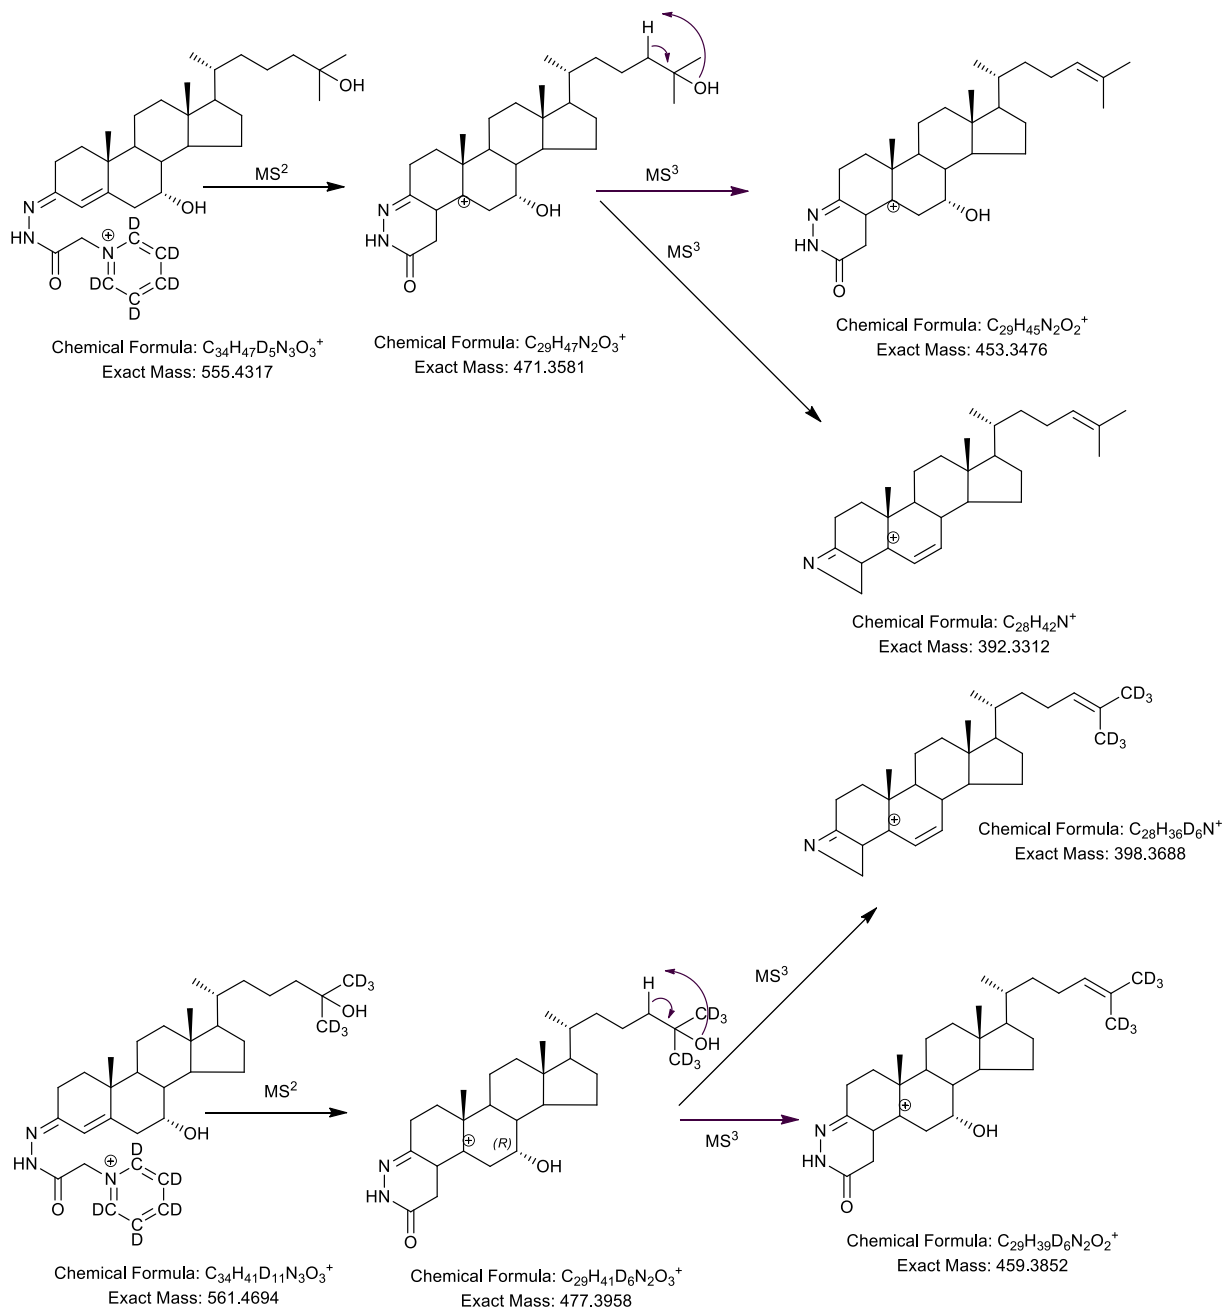



Figure S4J

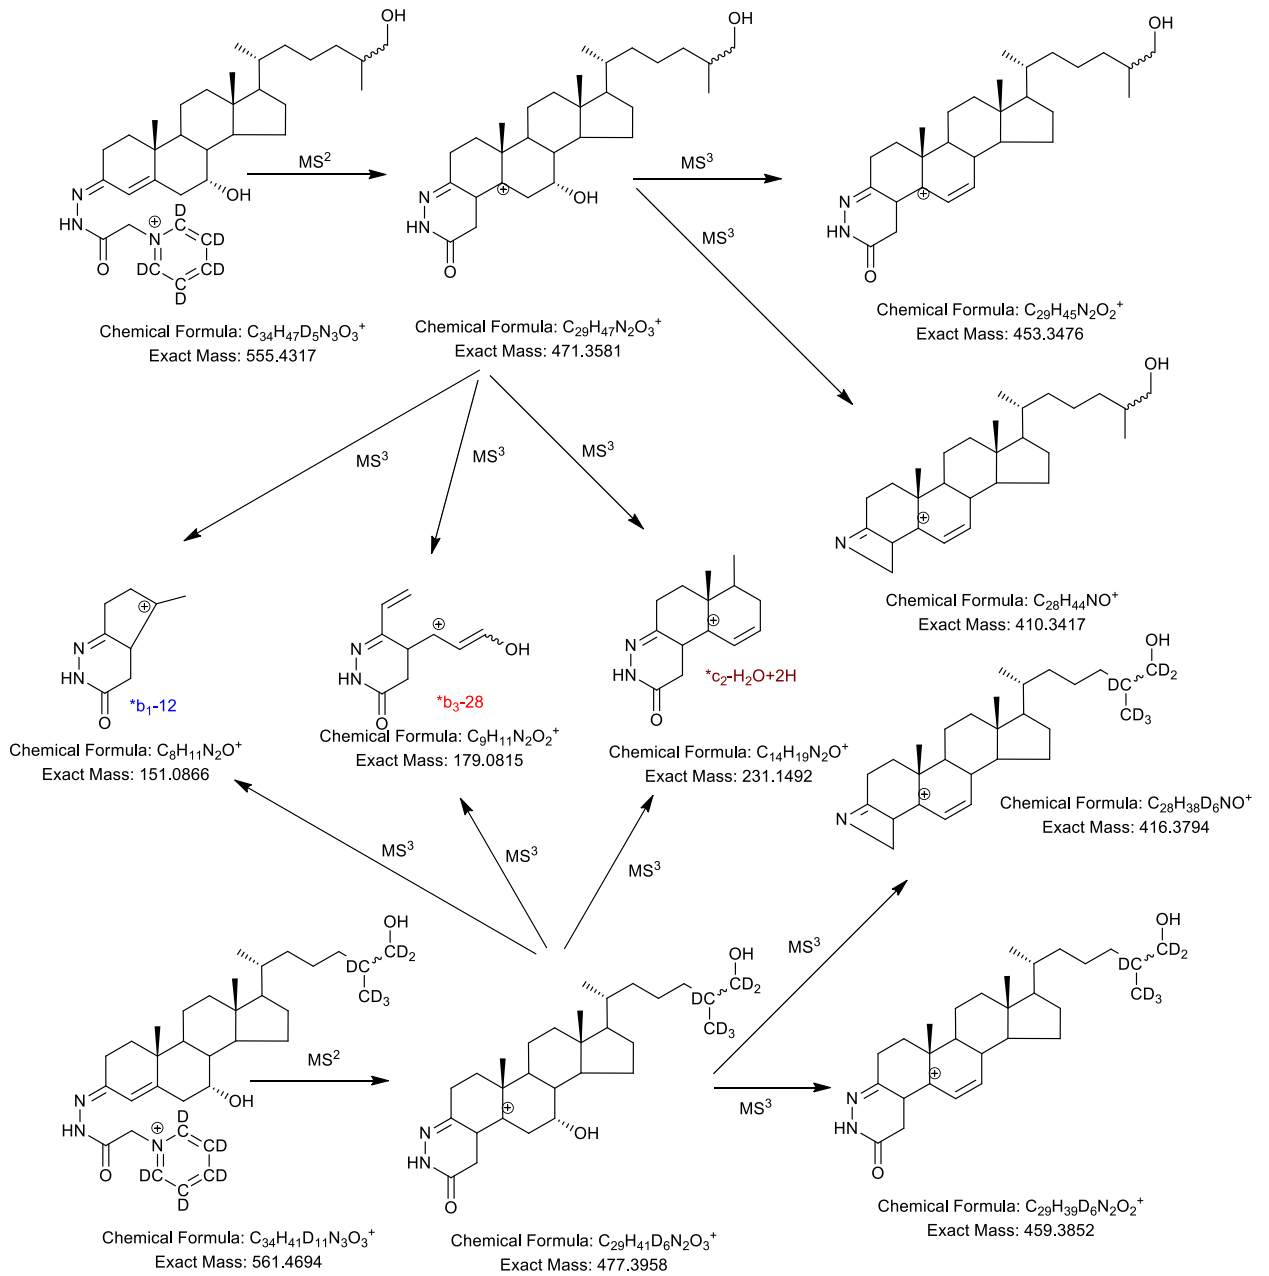

Figure S4K

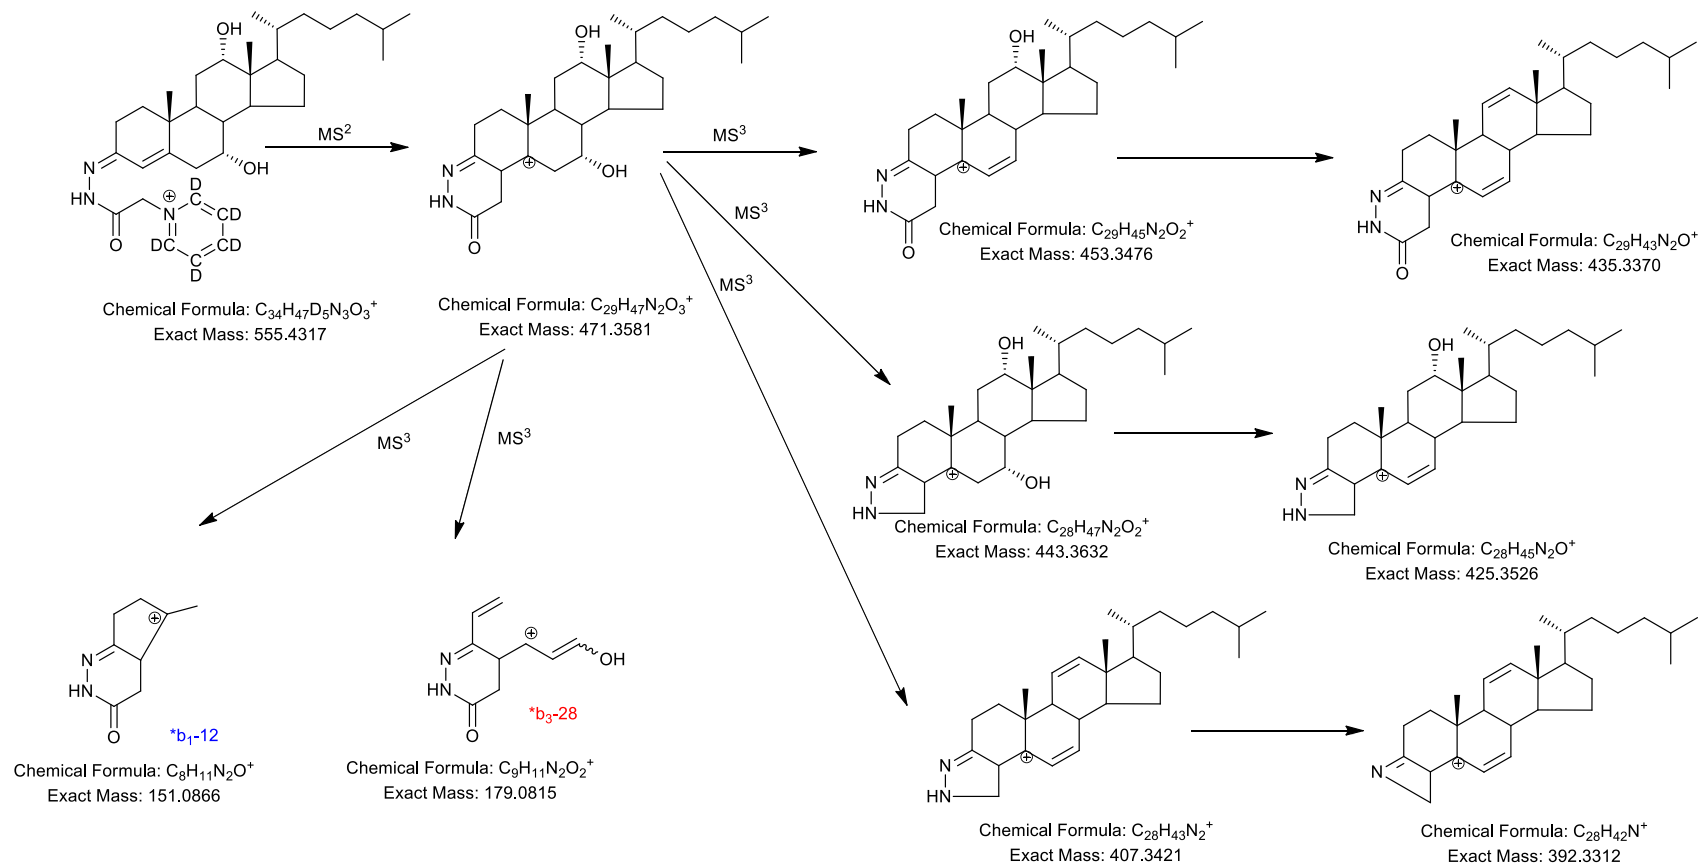

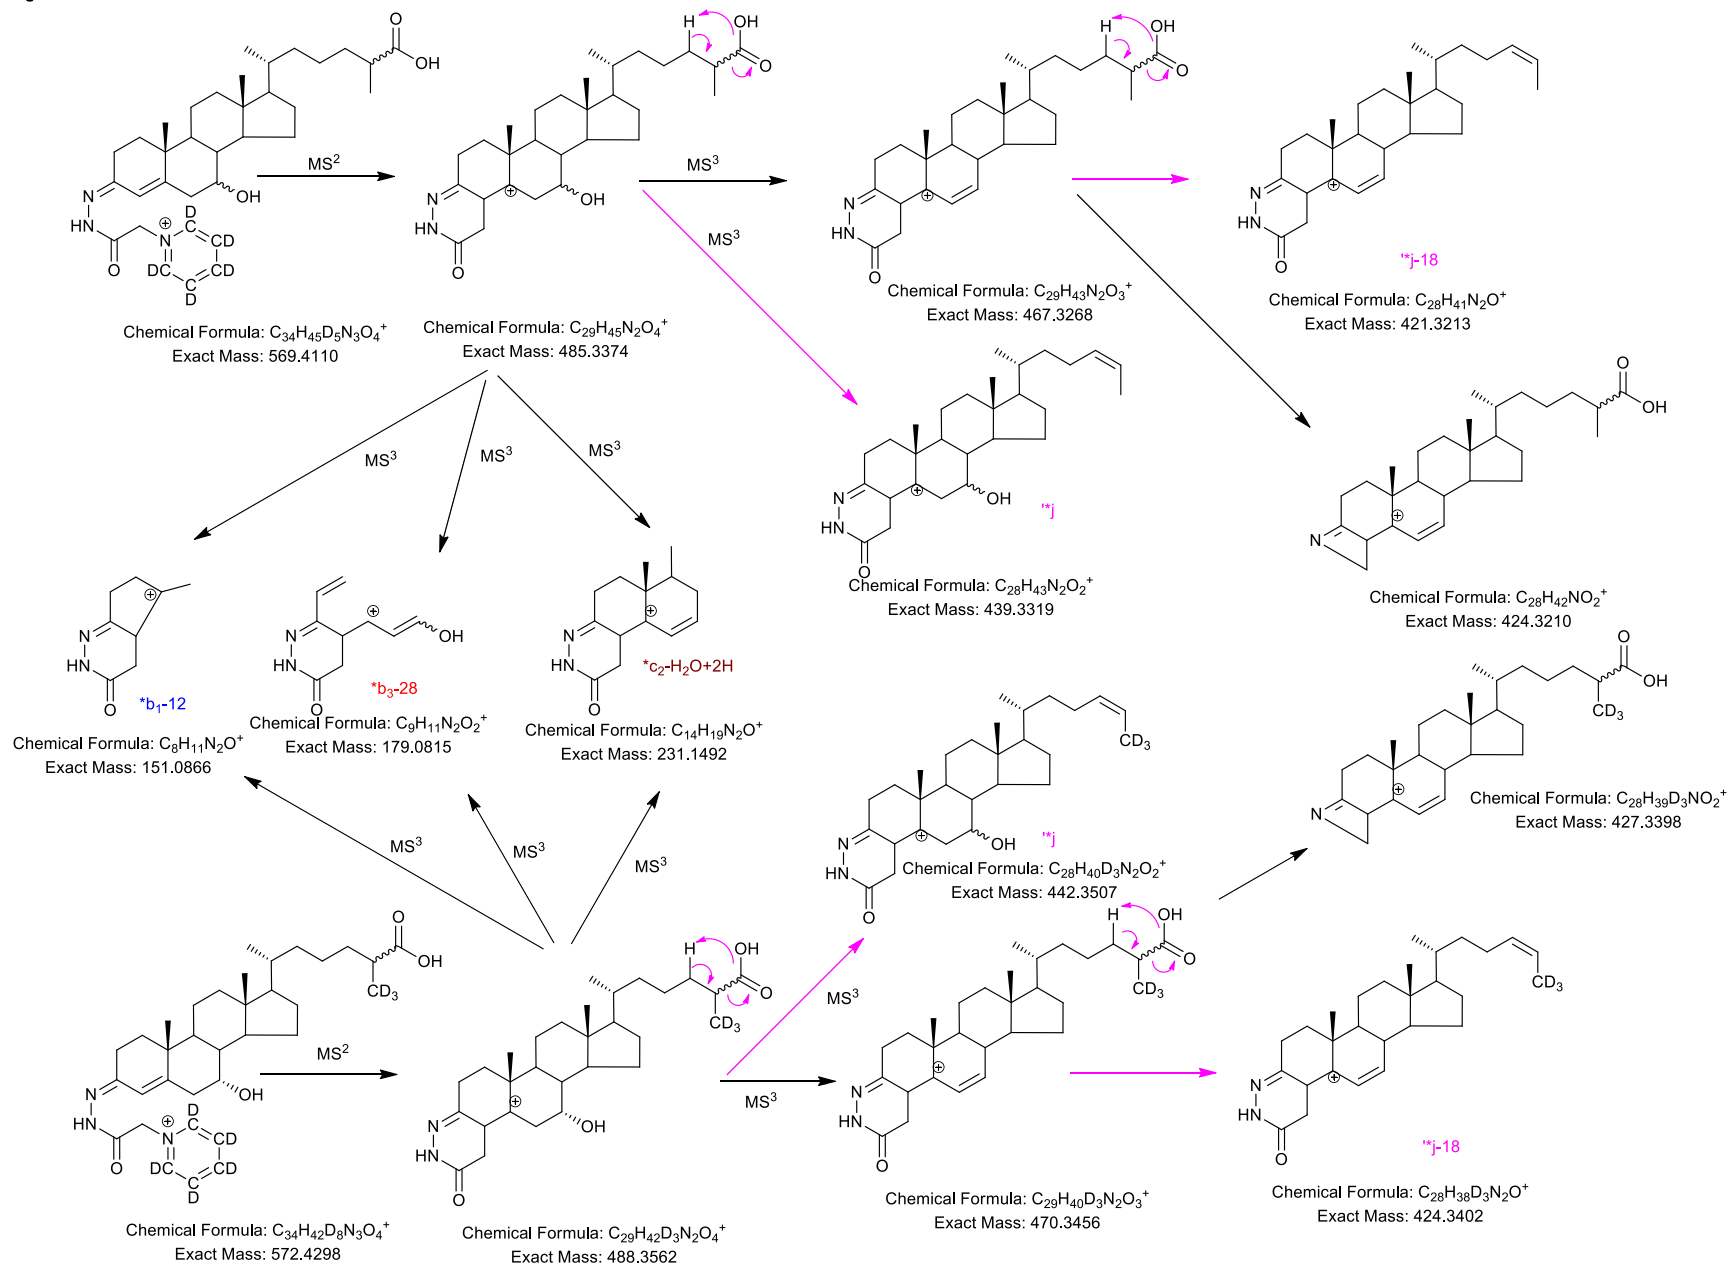

Figure S4M

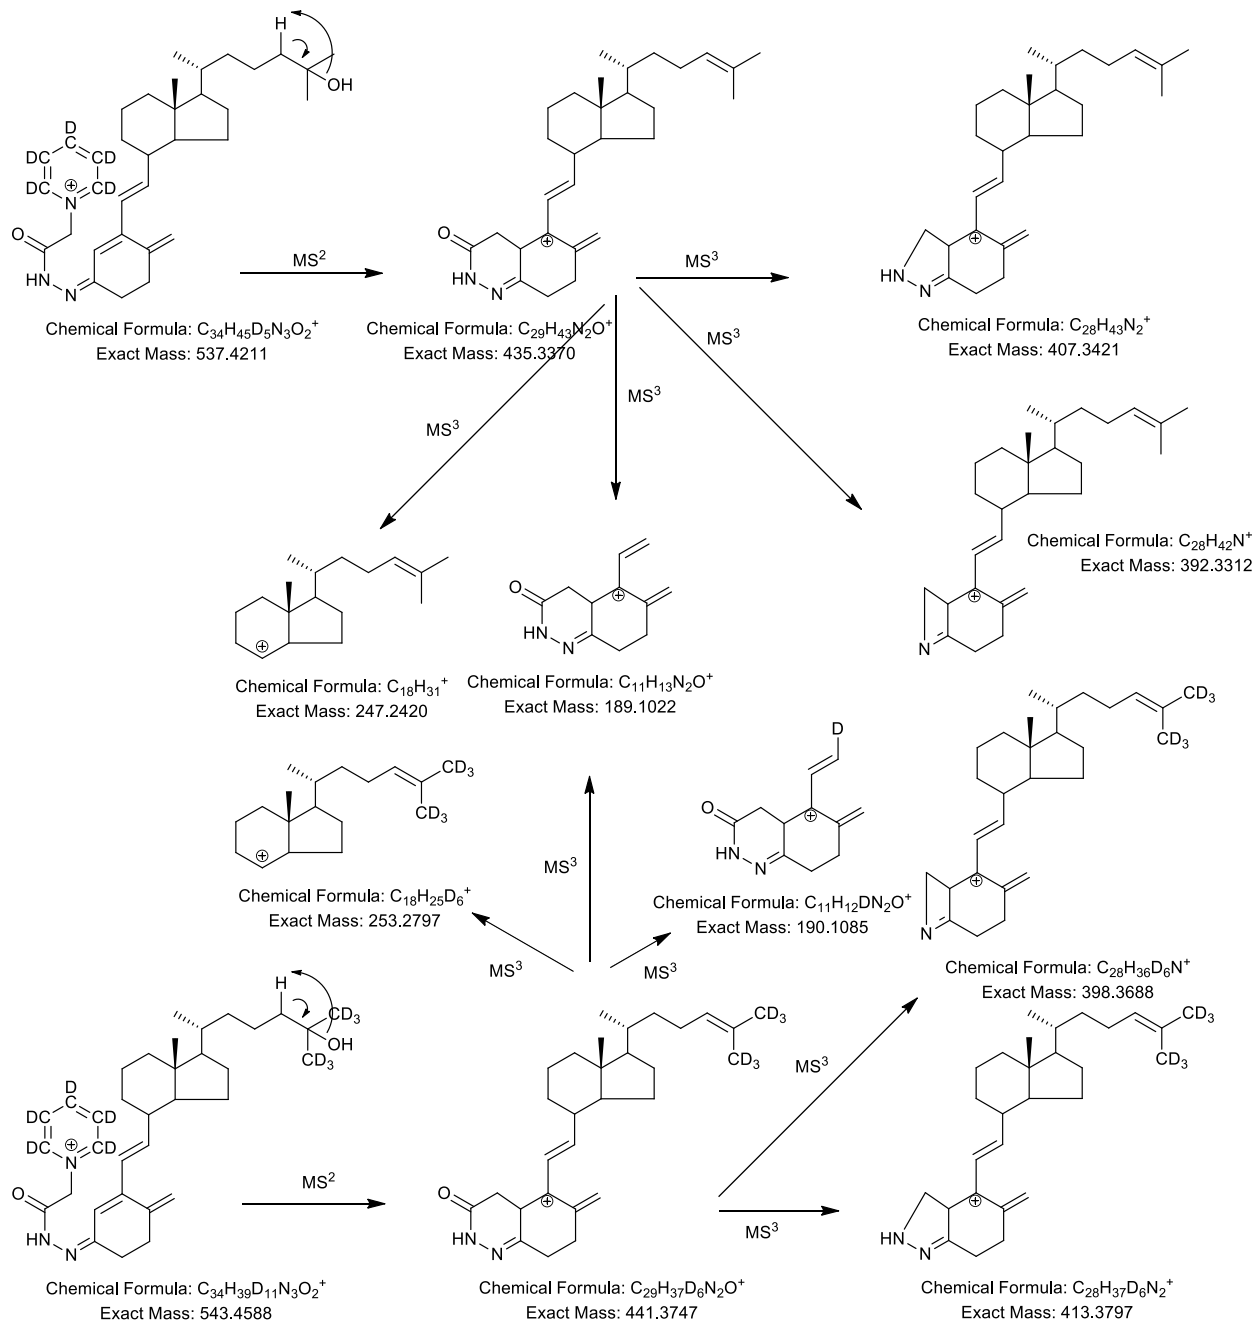

Figure S4N upper

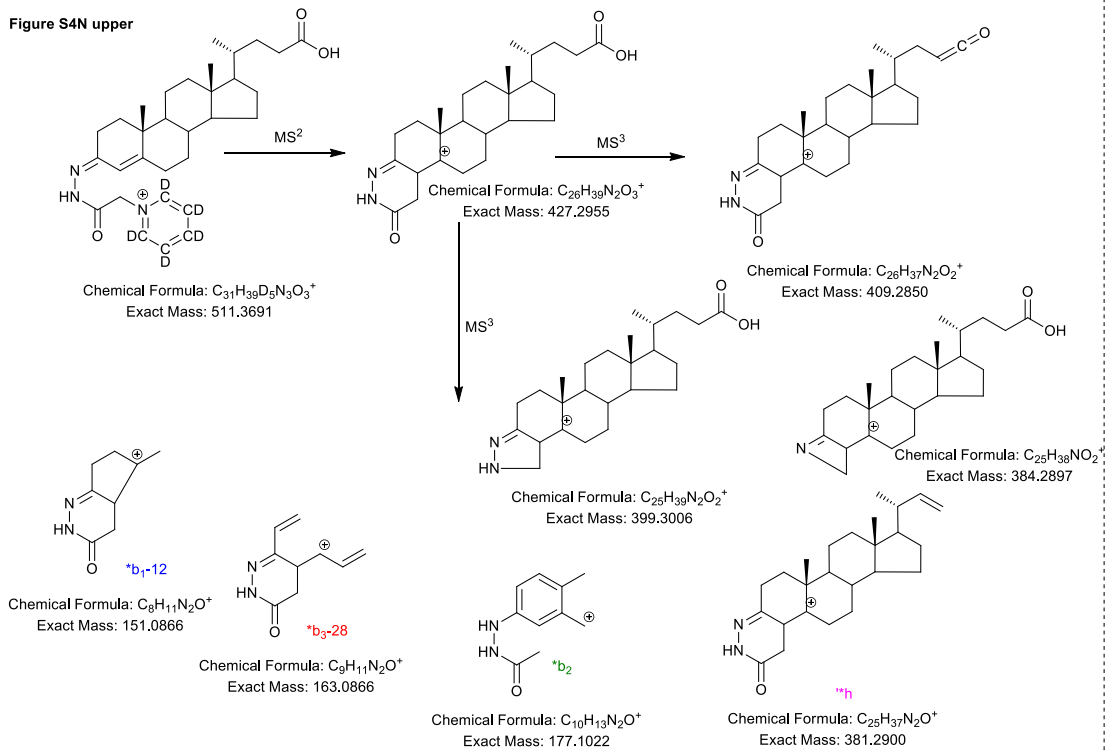

Figure S4N lower

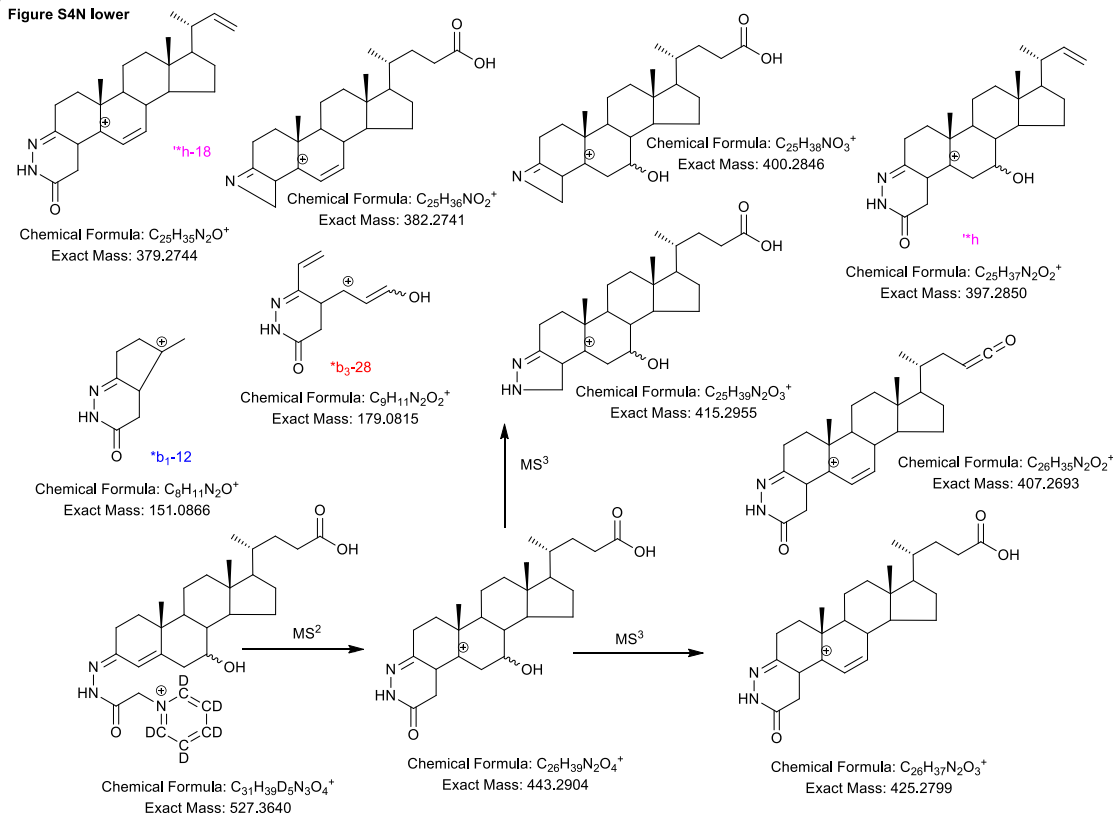

Figure S40

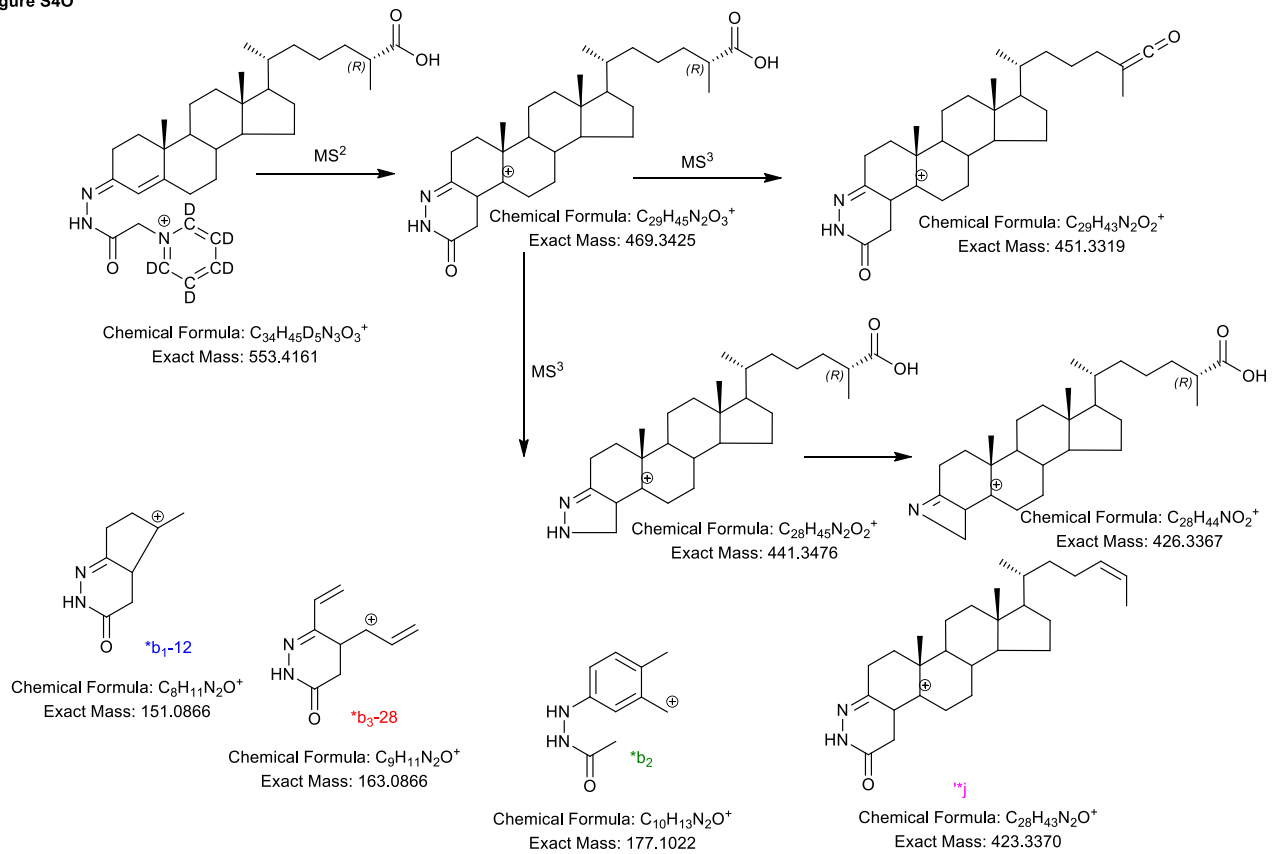

Figure 4P

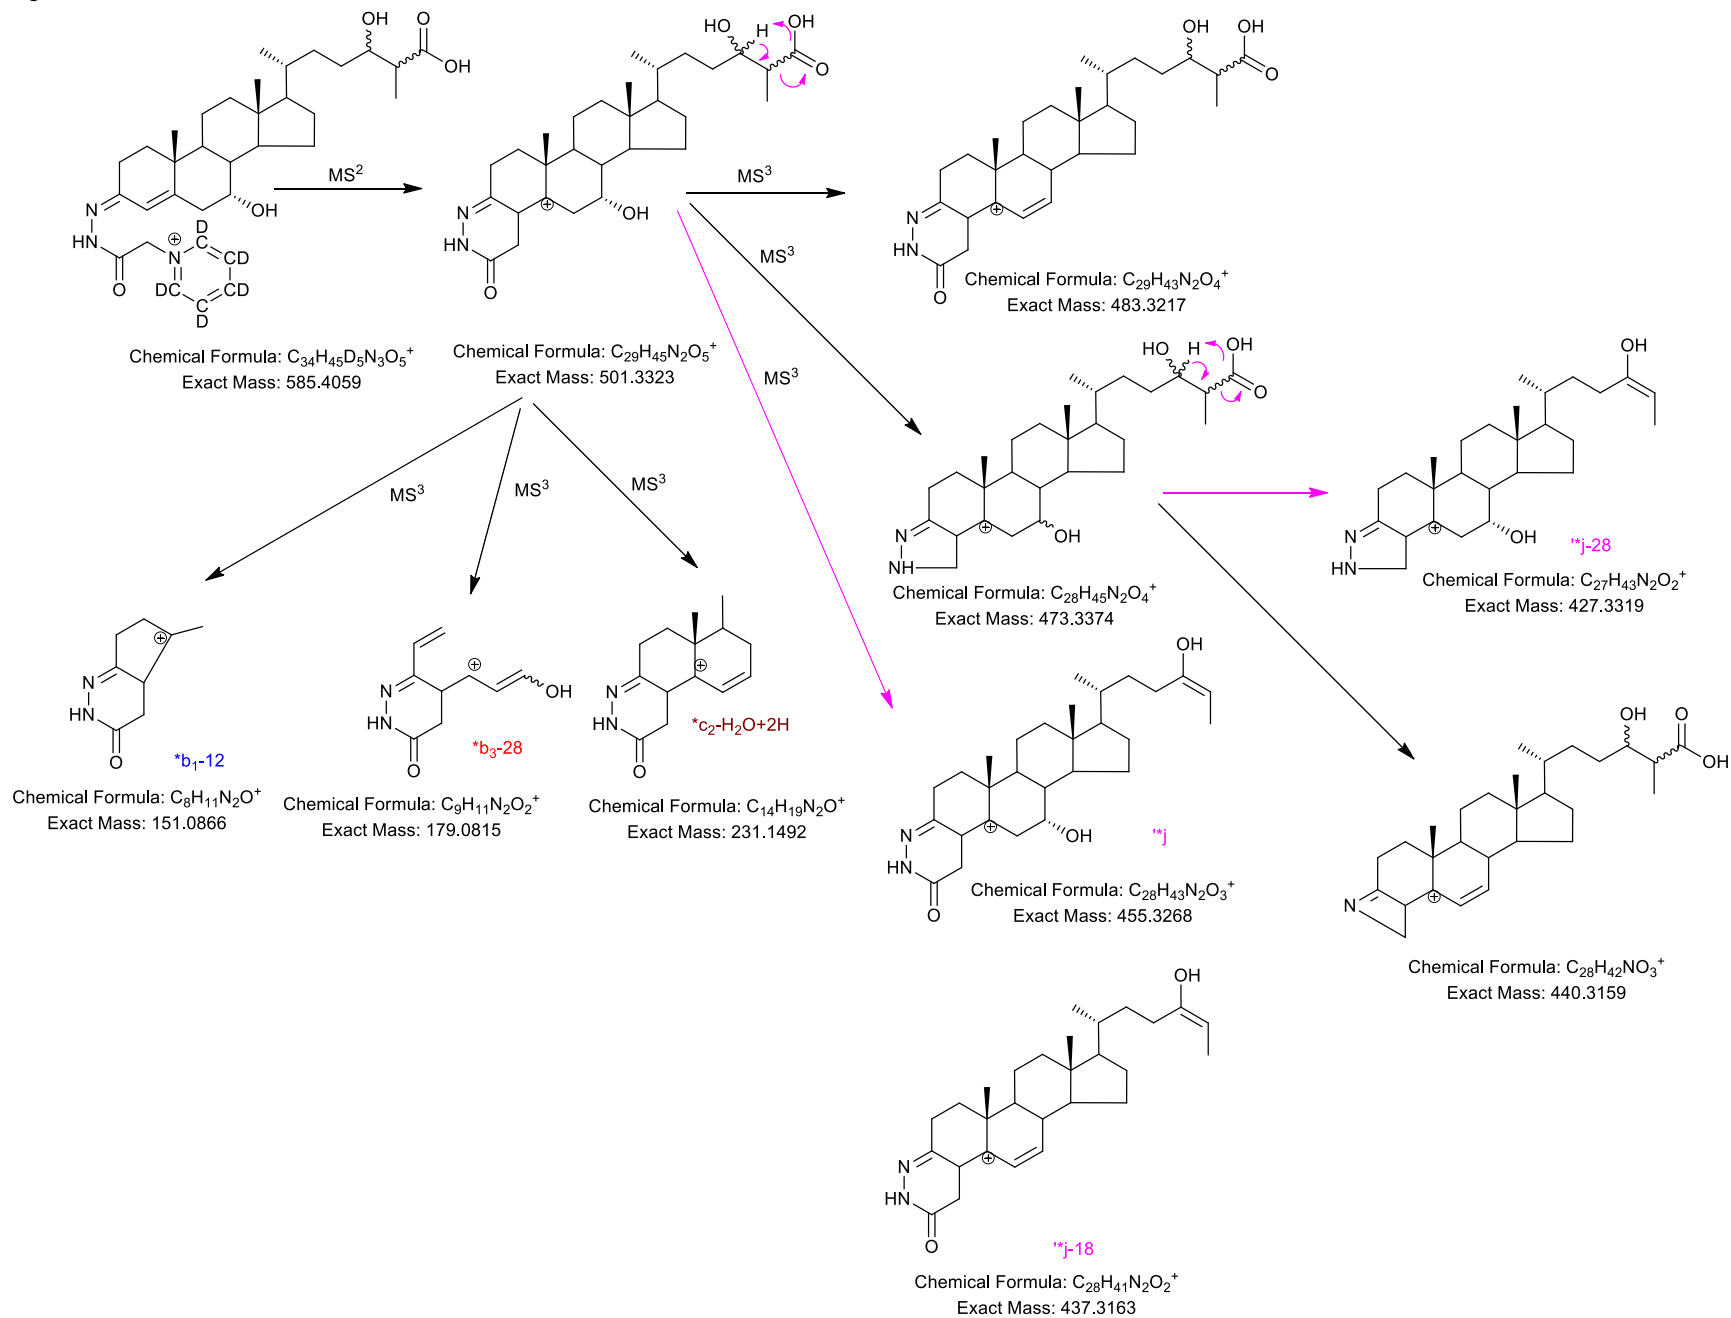





Figure S4R

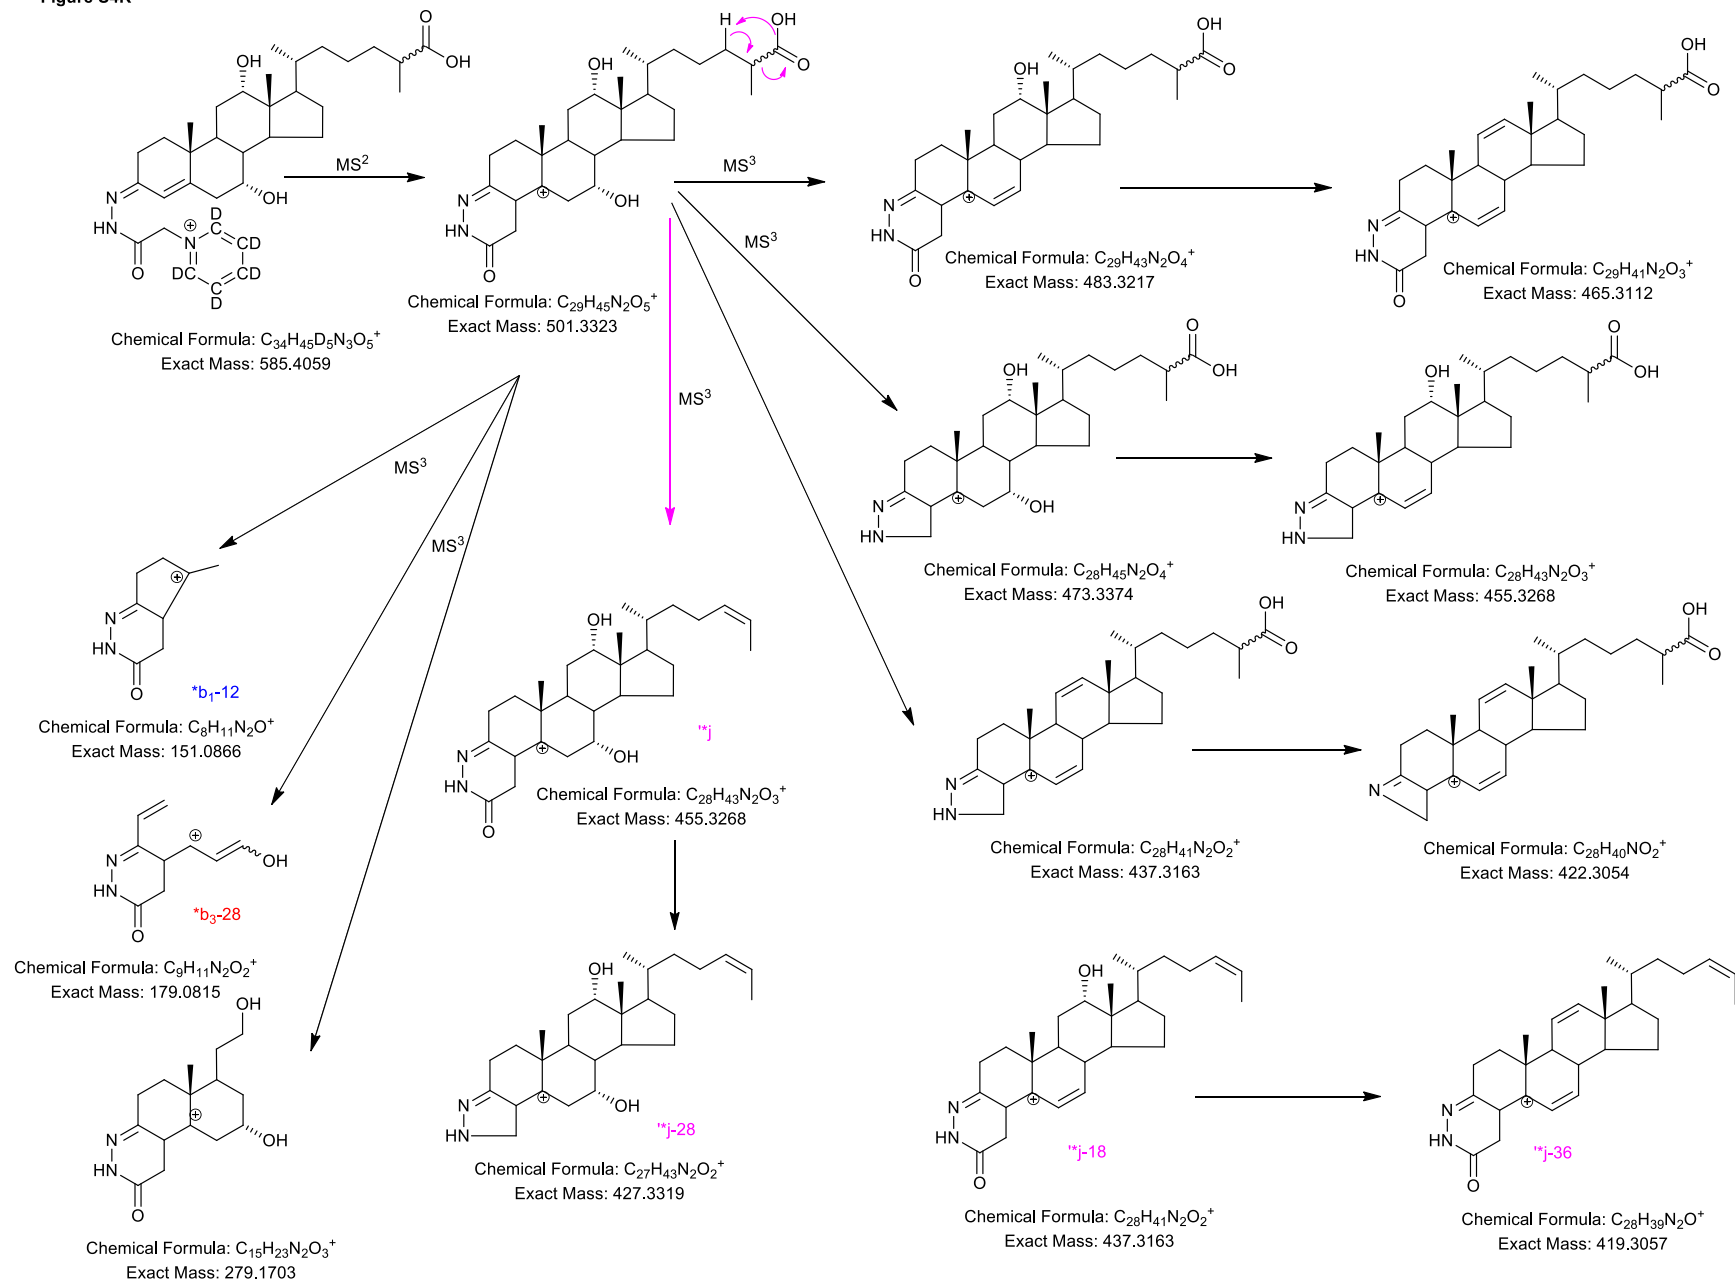



Figure S4T

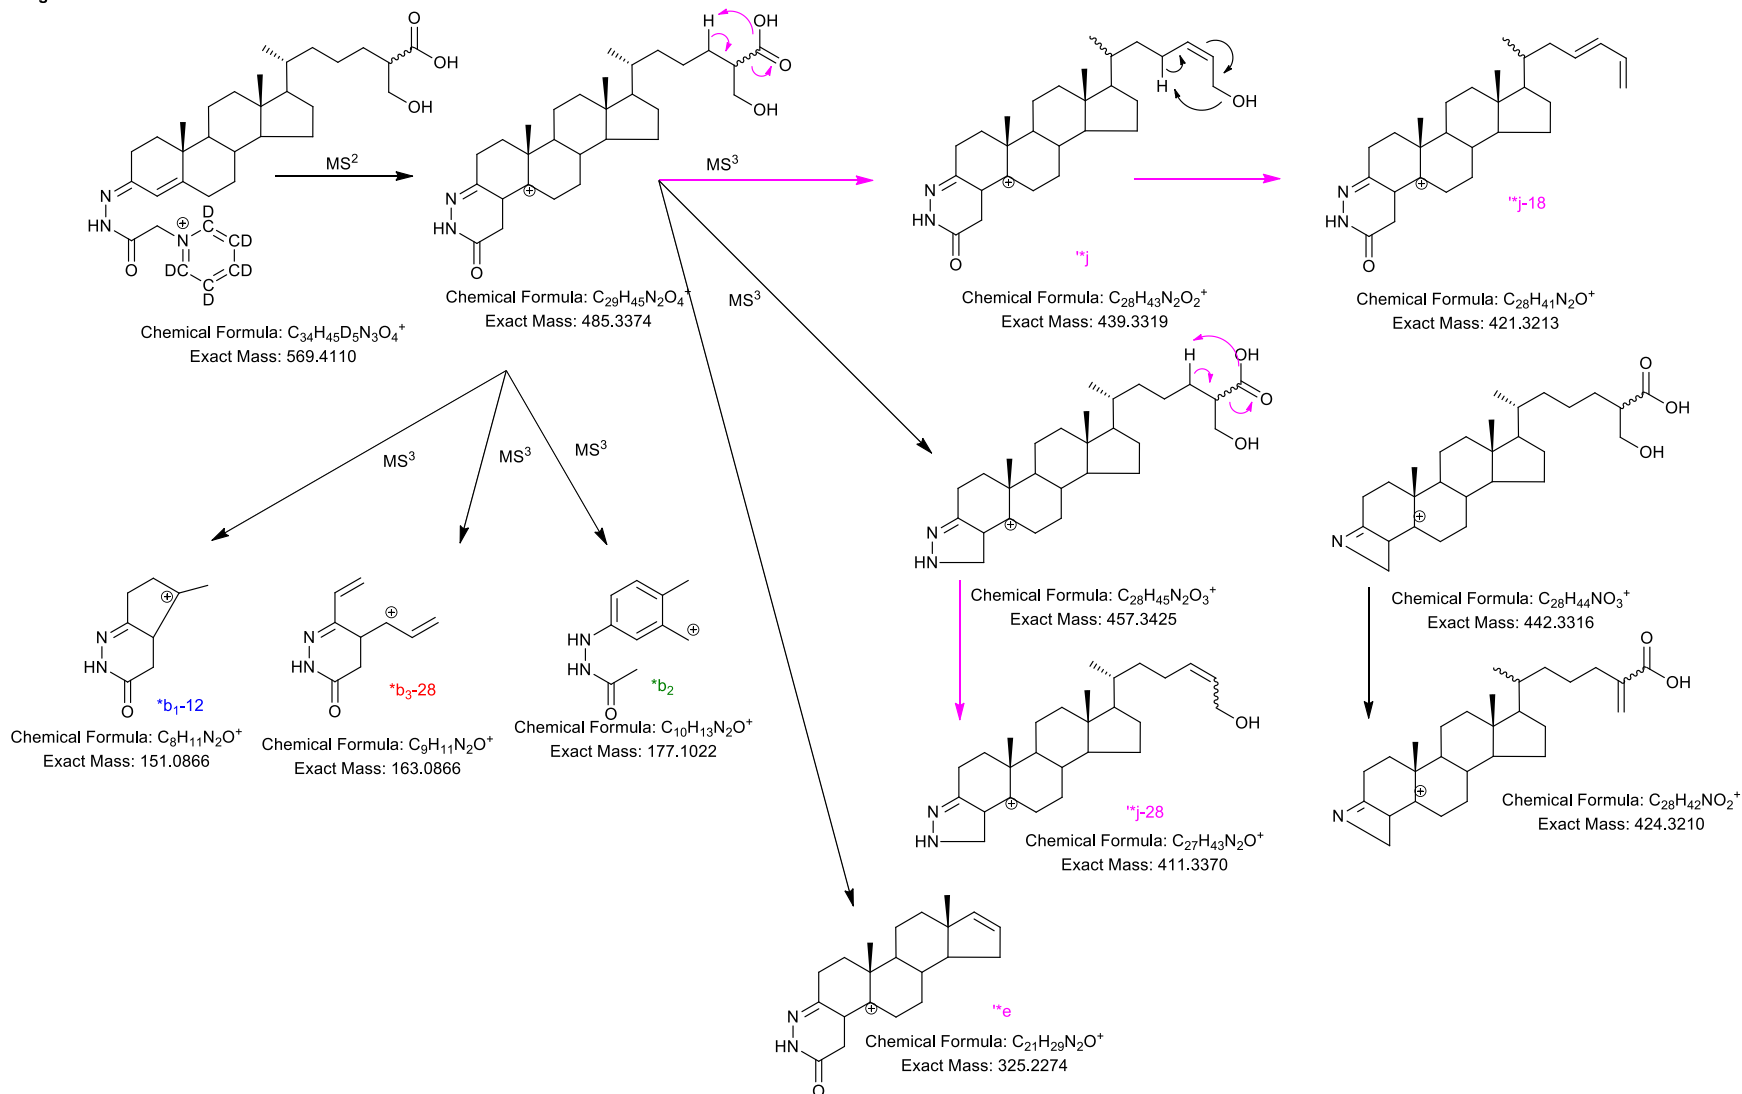

Figure S4U

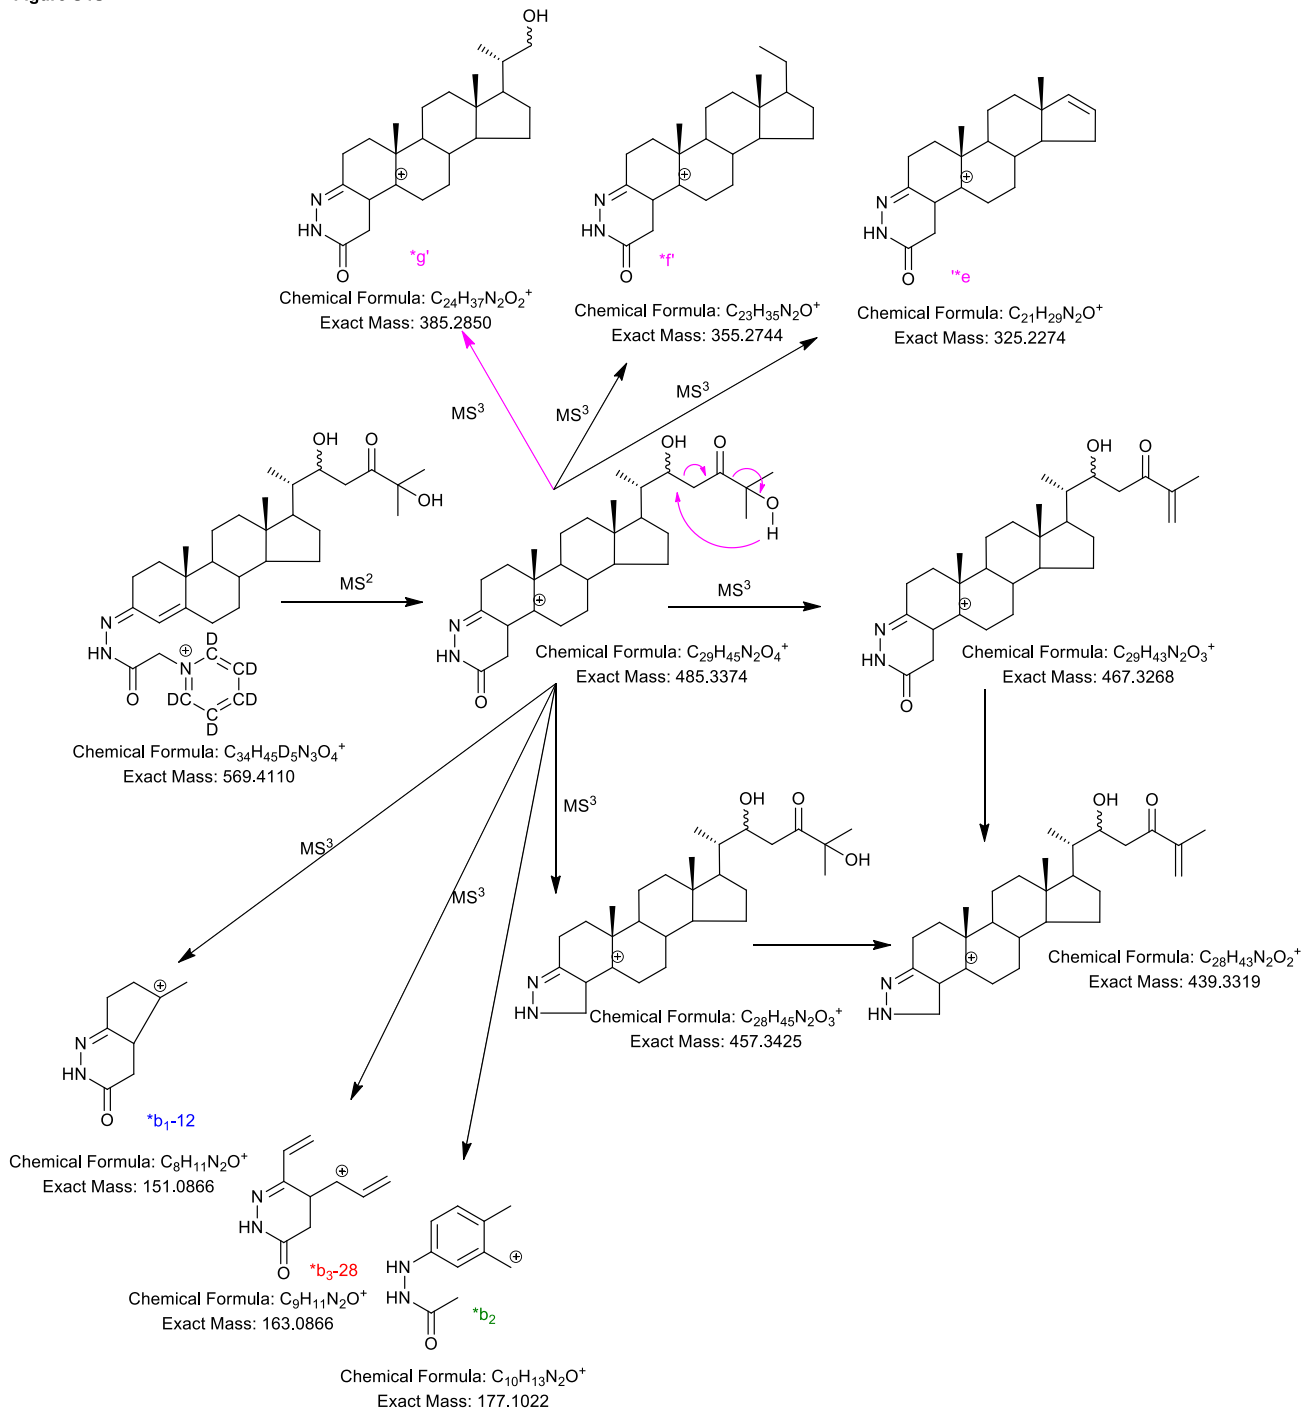

Figure S4V

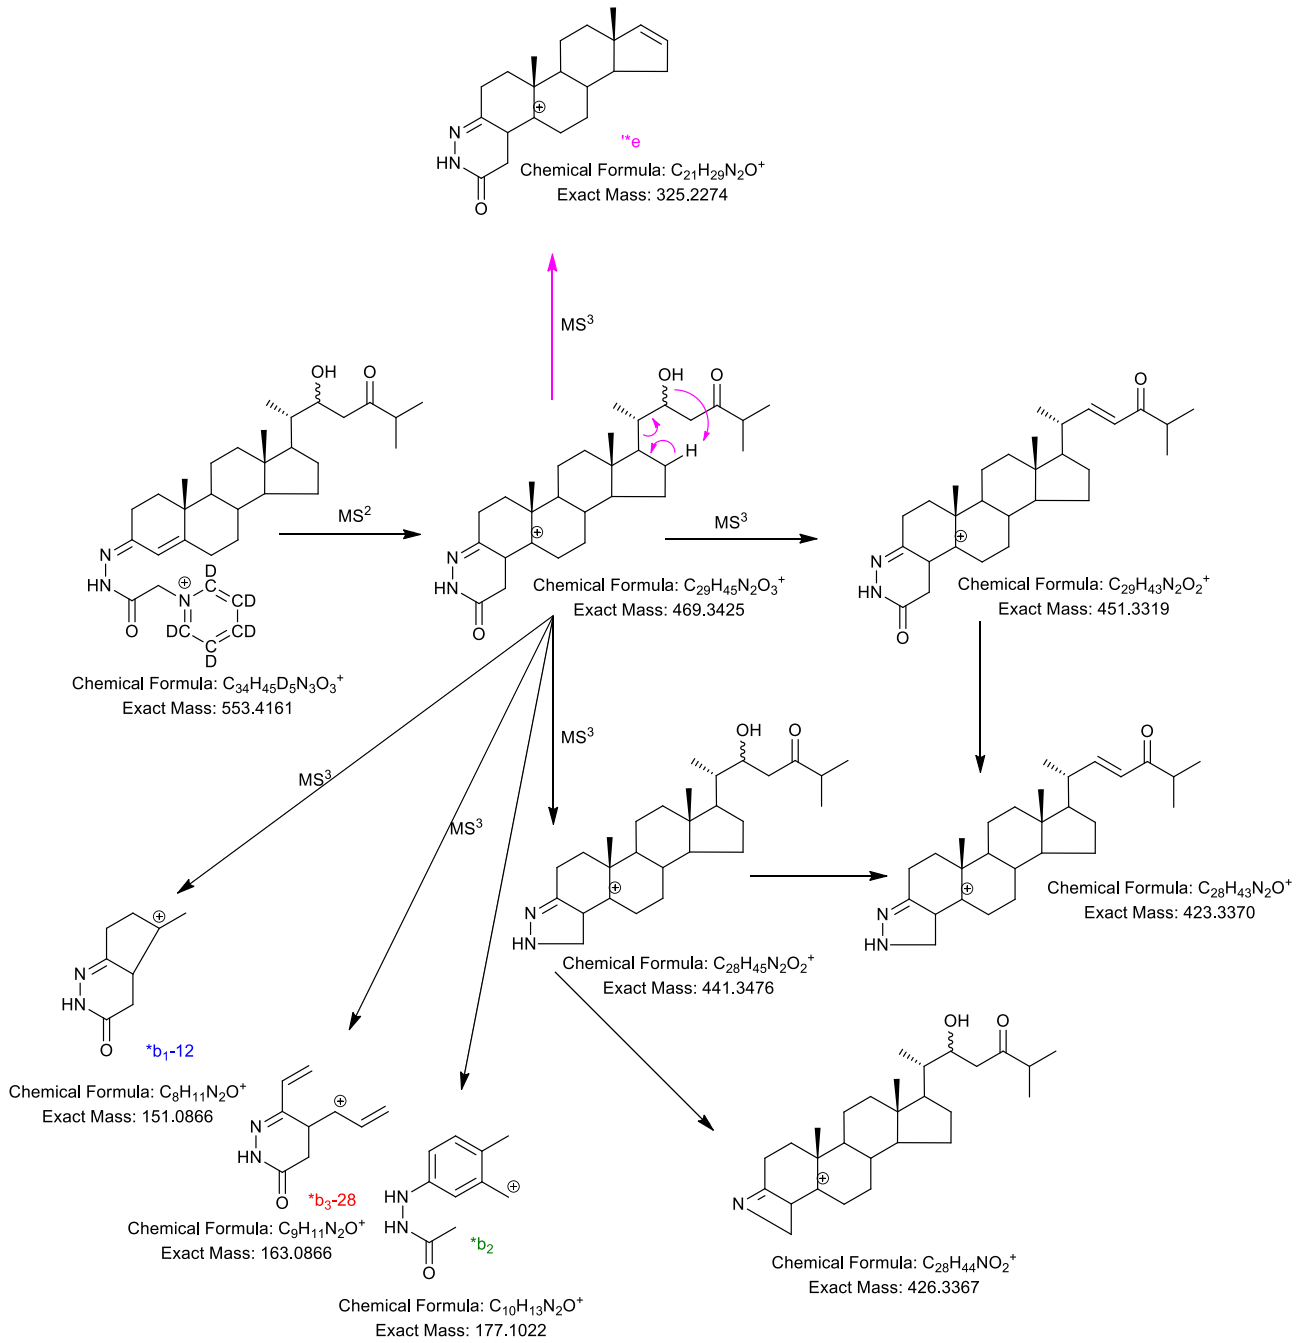

EY\_191014\_100uL-NIST-QC\_100uL-OxySpla... 10/15/19 02:23:26  
100uL NIST (2018) + 100ul OxysterolSPLASH + 10ng 22S-HCO-D7 + 20ug  
EY\_191014\_100uL-NIST-QC\_100uL-OxySplash\_rep2of5\_Fr1A=GPd5\_Fr1E  
F: ITMS + c ESI Full ms3 539.44@cid30.00 455.36@cid35.00 [125.00-550.00]

9.13 AV: 1 NL: 5.83E2

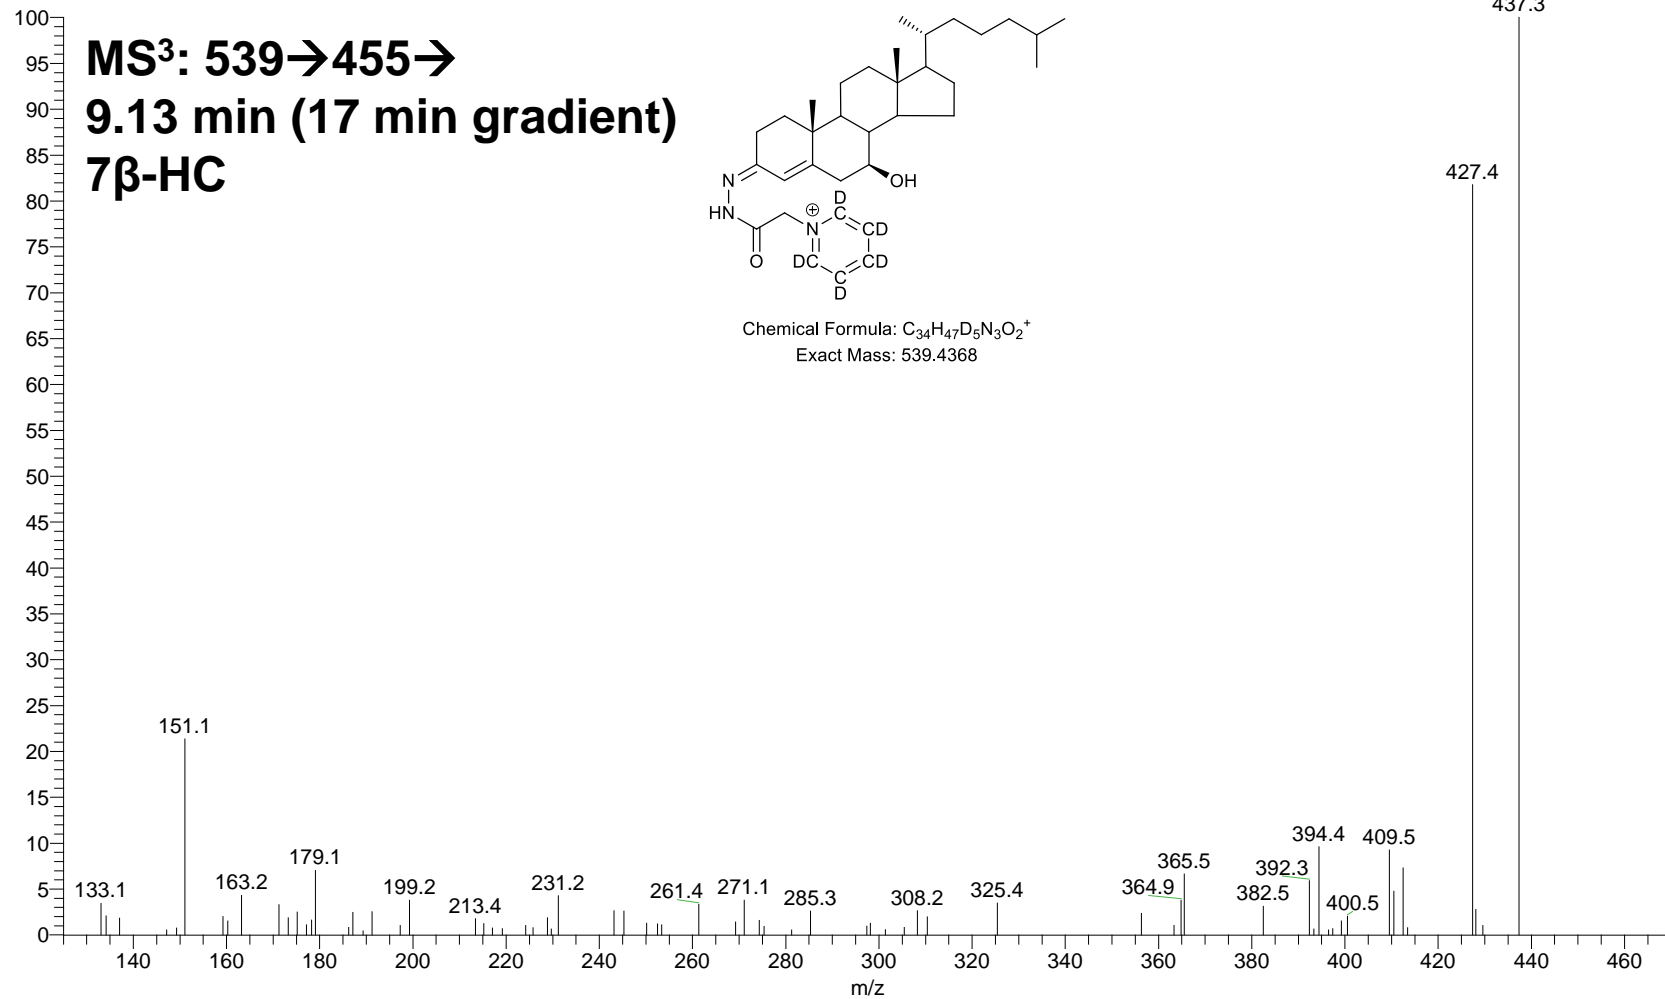

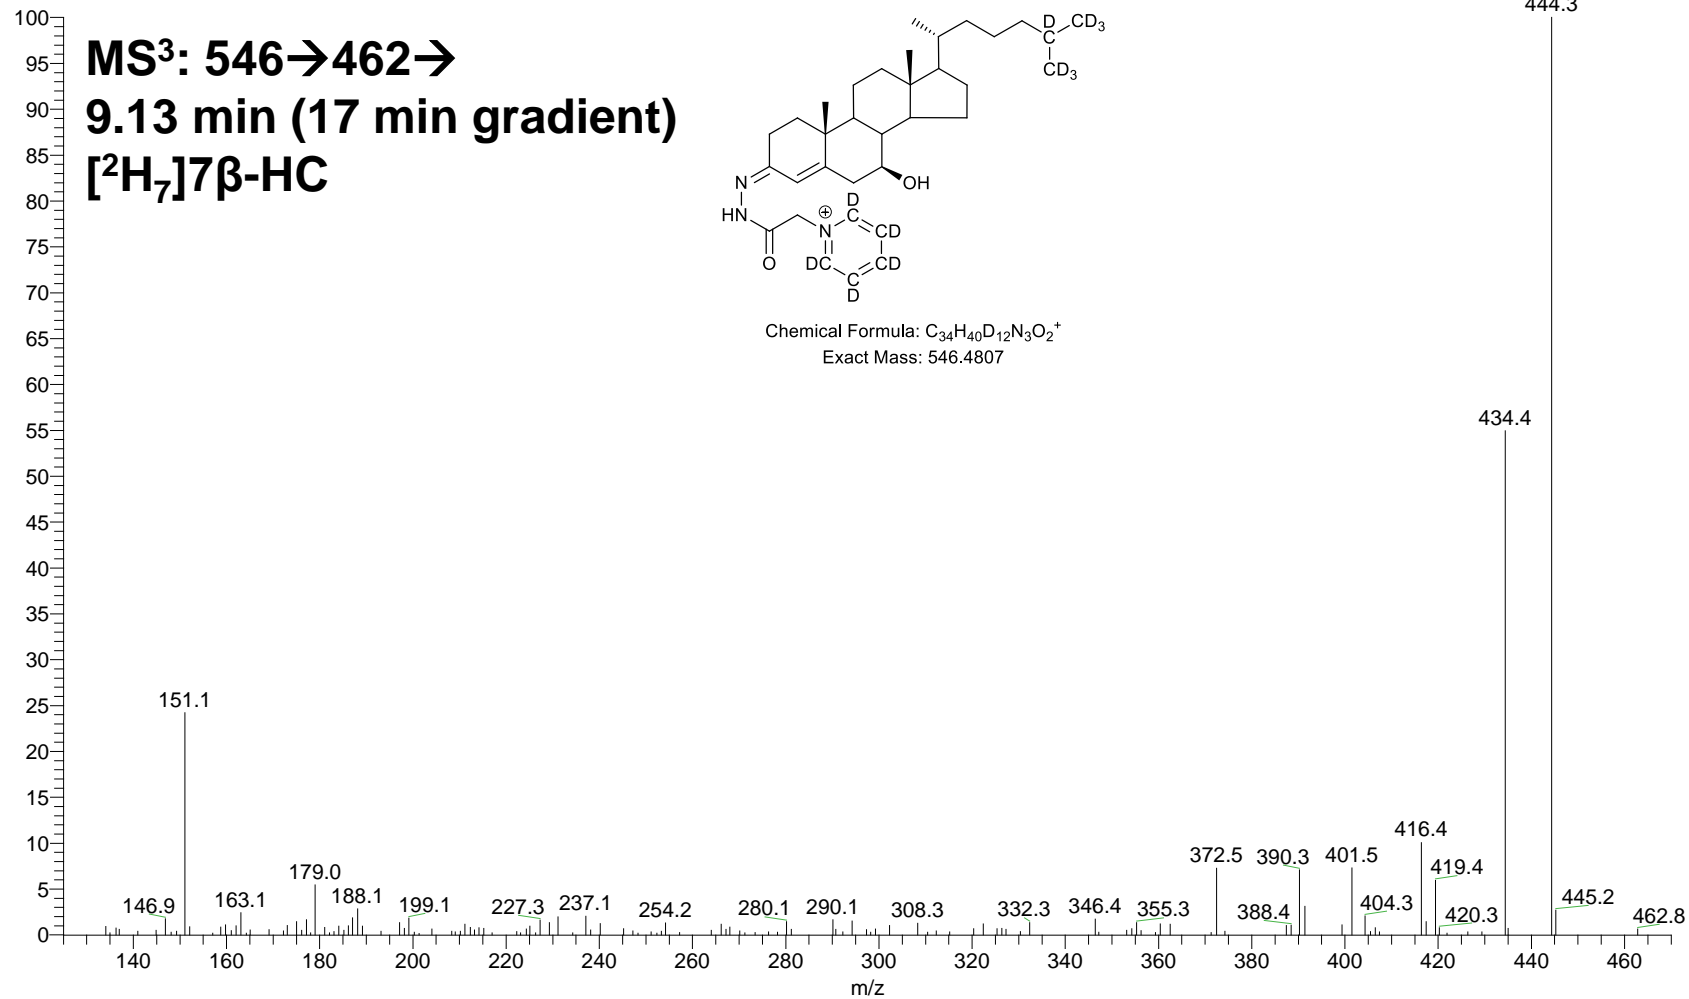

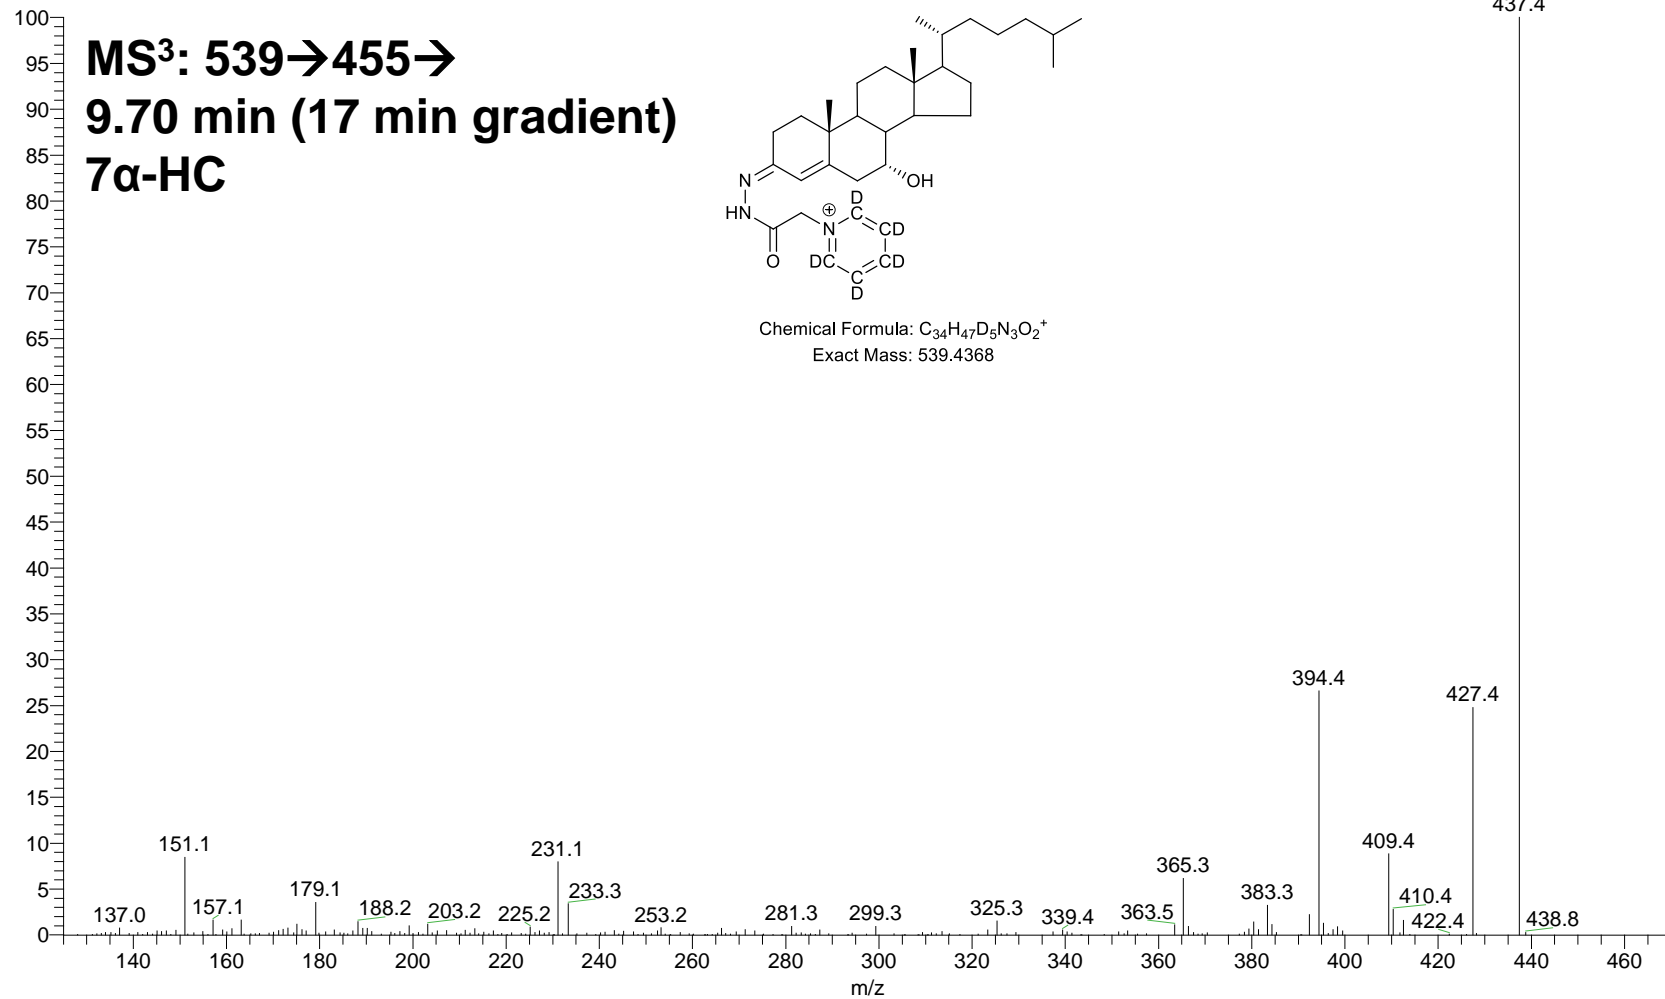



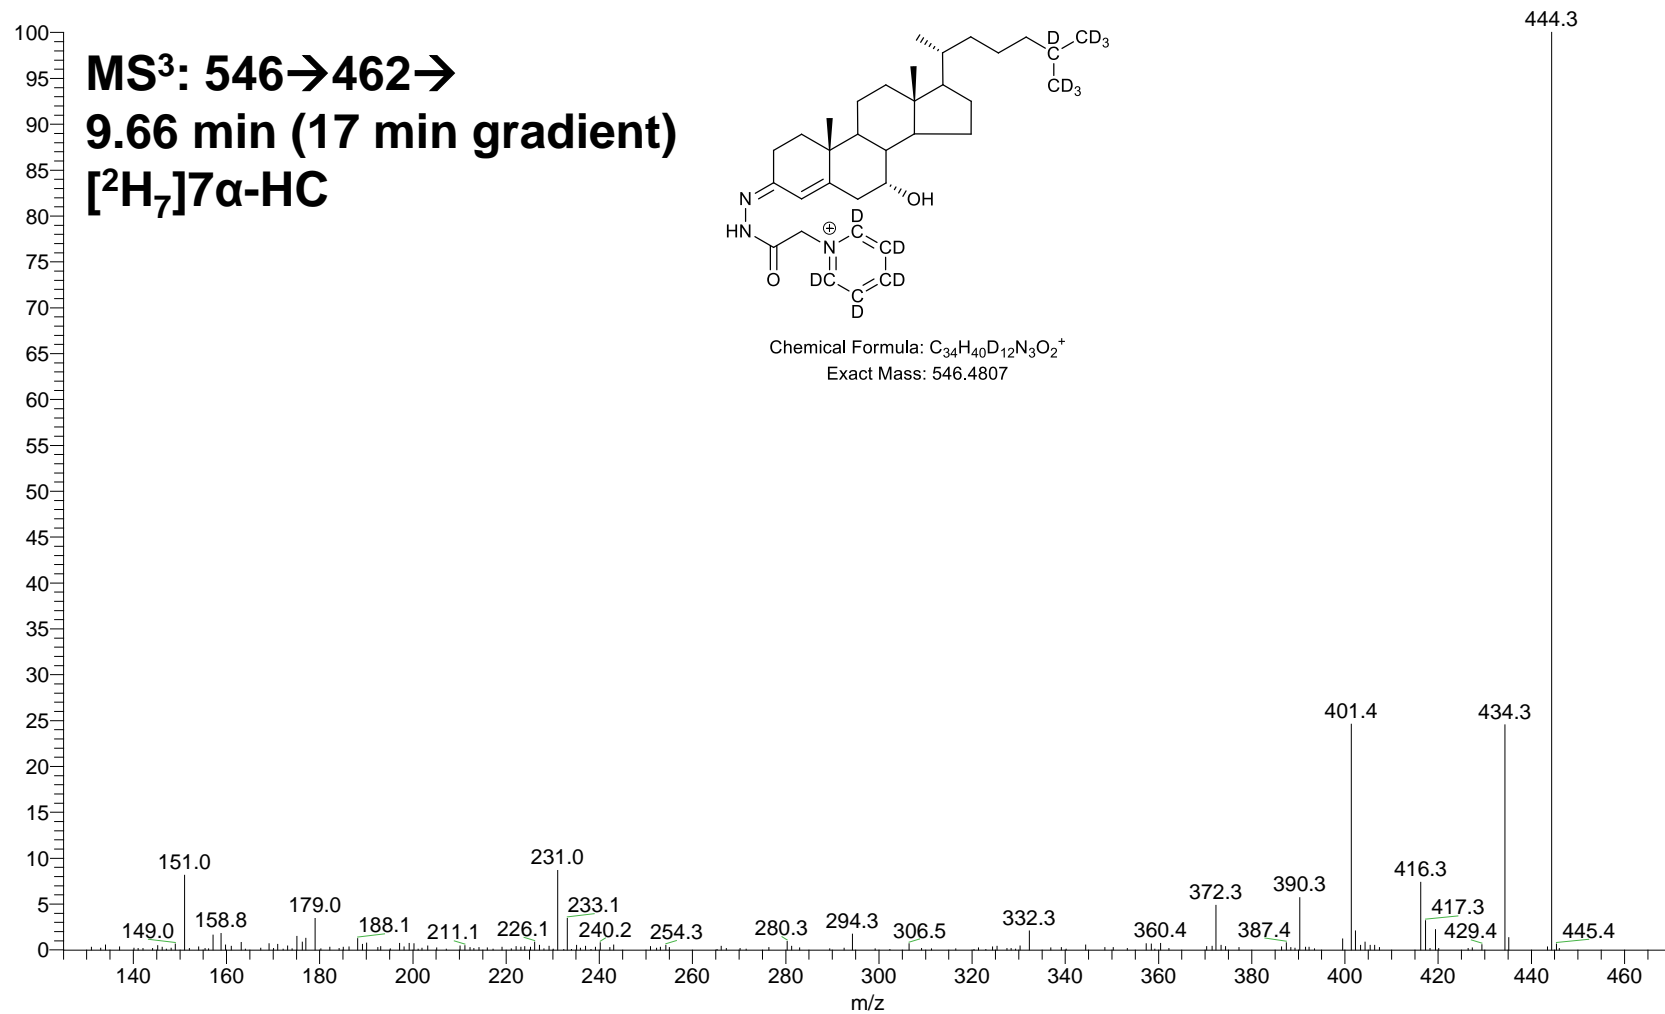

EY\_191014\_100uL-NIST-QC\_100uL-OxySpla... 10/15/19 02:23:26  
100uL NIST (2018) + 100ul OxysterolSPLASH + 10ng 22S-HCO-D7 + 20ug  
EY\_191014\_100uL-NIST-QC\_100uL-OxySplash\_rep2of5\_Fr1A=GPd5\_Fr1E  
F: ITMS + c ESI Full ms3 539.44@cid30.00 455.36@cid35.00 [125.00-550.00]

9.97 AV: 1 NL: 1.11E3

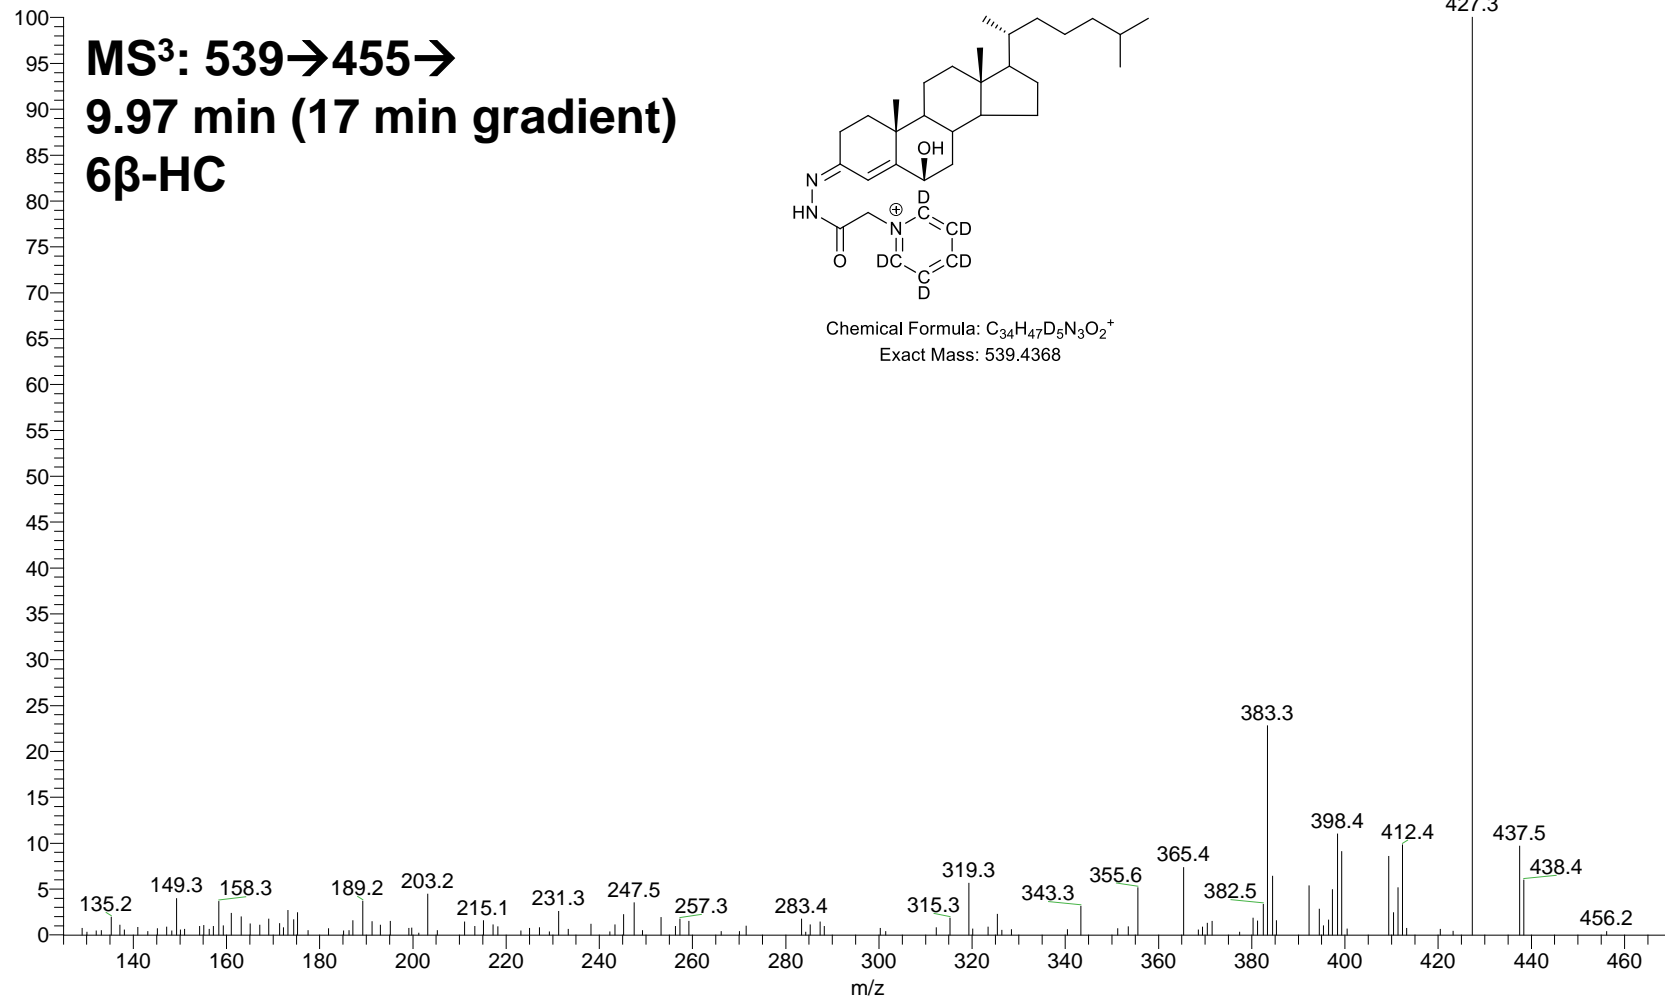

EY\_191014\_100uL-NIST-QC\_100uL-OxySpla... 10/15/19 02:23:26  
100uL NIST (2018) + 100ul OxysterolSPLASH + 10ng 22S-HCO-D7 + 20ug  
EY\_191014\_100uL-NIST-QC\_100uL-OxySplash\_rep2of5\_Fr1A=GPd5\_Fr1E  
F: ITMS + c ESI Full ms3 546.48@cid30.00 462.41@cid35.00 [125.00-555.00]

9.93 AV: 1 NL: 2.25E3

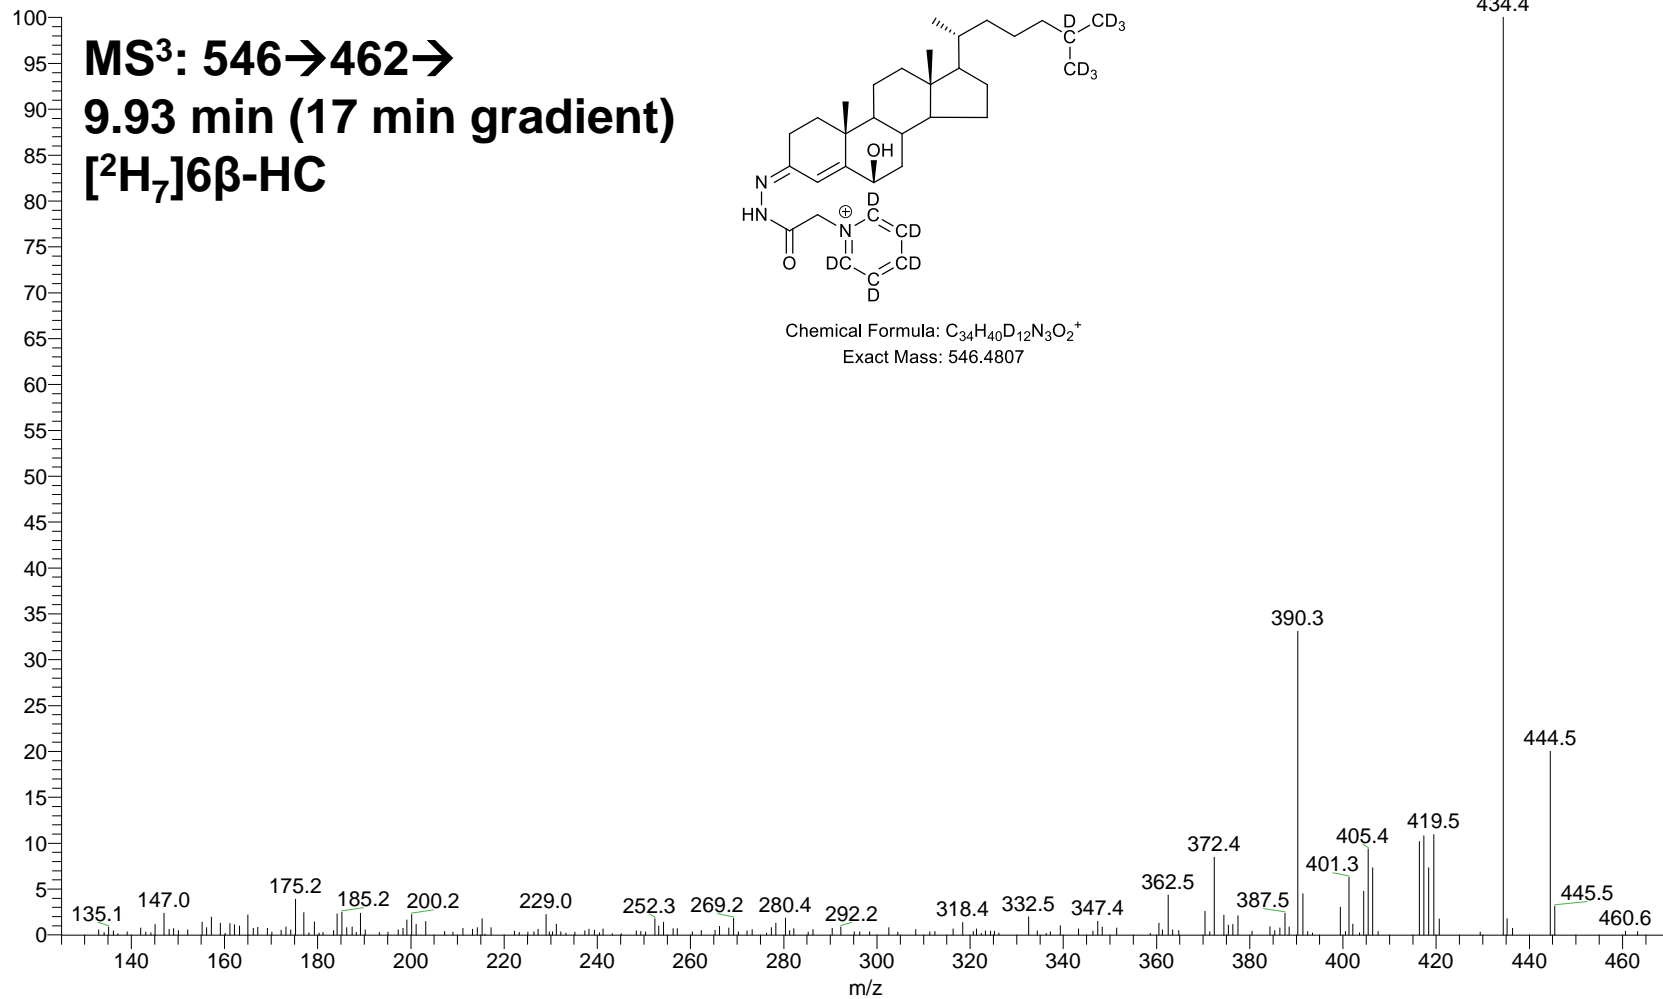

EY\_191014\_100uL-NIST-QC\_100uL-OxySpla... 10/15/19 02:23:26  
100uL NIST (2018) + 100ul OxysterolSPLASH + 10ng 22S-HCO-D7 + 20  
EY\_191014\_100uL-NIST-QC\_100uL-OxySplash\_rep2of5\_Fr1A=GPd5\_F  
F: ITMS + c ESI Full ms3 534.41@cid30.00 455.36@cid35.00 [125.00-55

T: 9.37 AV: 1 NL: 1.07E3

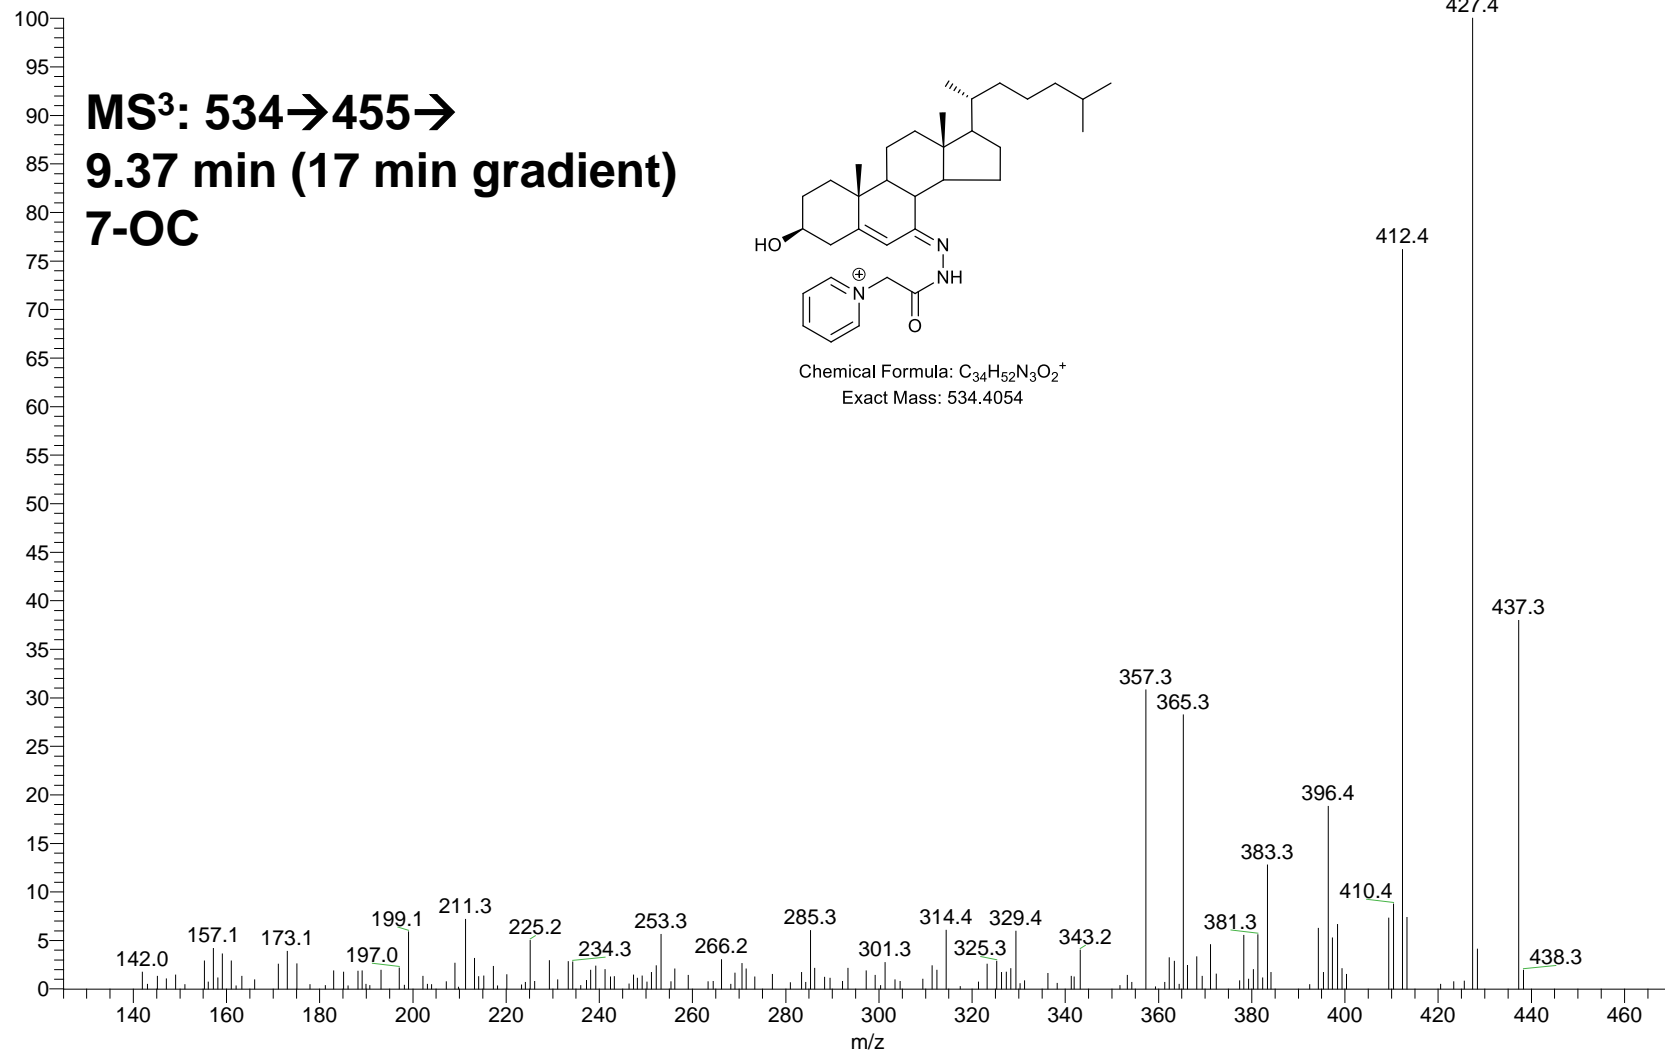

EY\_191014\_100uL-NIST-QC\_100uL-OxySpla... 10/15/19 02:23:26  
100uL NIST (2018) + 100ul OxysterolSPLASH + 10ng 22S-HCO-D7 + 20  
EY\_191014\_100uL-NIST-QC\_100uL-OxySplash\_rep2of5\_Fr1A=GPd5\_F  
F: ITMS + c ESI Full ms3 541.45@cid30.00 462.41@cid35.00 [125.00-55

T: 9.33 AV: 1 NL: 2.41E3

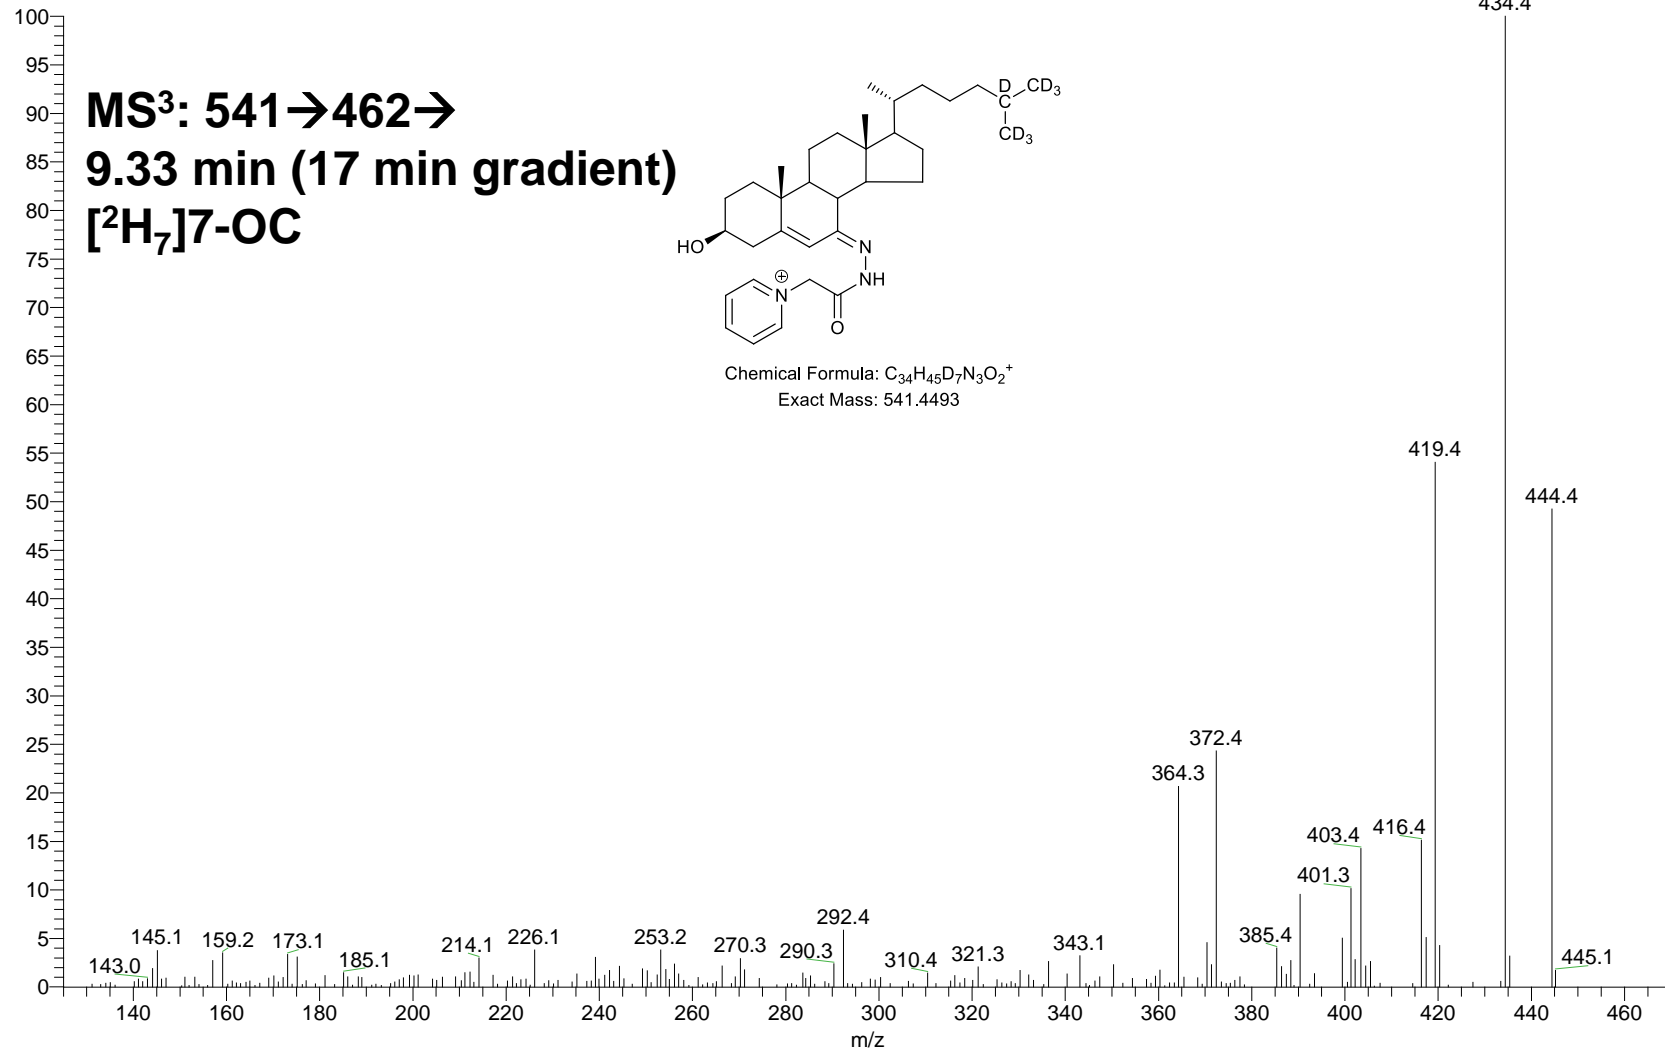

EY\_191014\_100uL-NIST-QC\_100uL-OxySpla... 10/15/19 02:23:26  
100uL NIST (2018) + 100uL OxysterolSPLASH + 10ng 22S-HCO-D7 + 20  
EY\_191014\_100uL-NIST-QC\_100uL-OxySplash\_rep2of5\_Fr1A=GPd5\_F  
F: ITMS + c ESI Full ms3 534.41@cid30.00 455.36@cid35.00 [125.00-55

T: 9.69 AV: 1 NL: 9.01E3

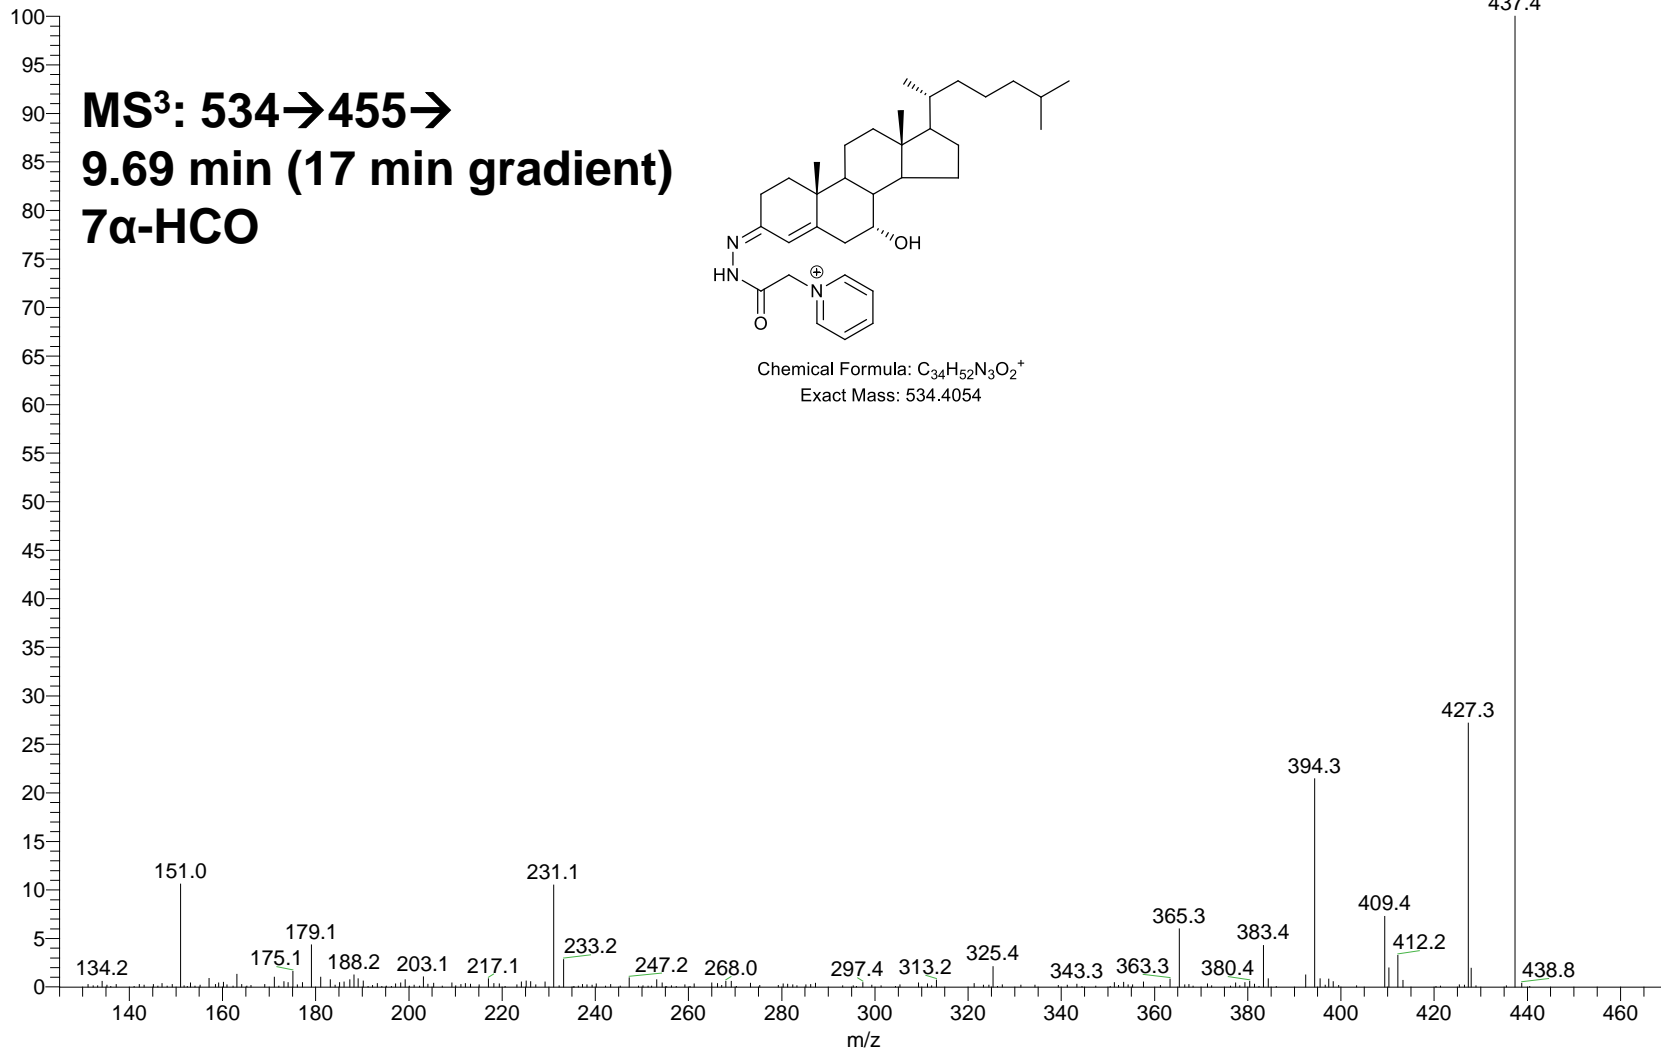

EY\_191014\_100uL-NIST-QC\_100uL-OxySpla... 10/15/19 02:23:26  
100uL NIST (2018) + 100ul OxysterolSPLASH + 10ng 22S-HCO-D7 + 20  
EY\_191014\_100uL-NIST-QC\_100uL-OxySplash\_rep2of5\_Fr1A=GPd5\_F  
F: ITMS + c ESI Full ms3 541.45@cid30.00 462.41@cid35.00 [125.00-55

T: 9.65 AV: 1 NL: 6.05E3

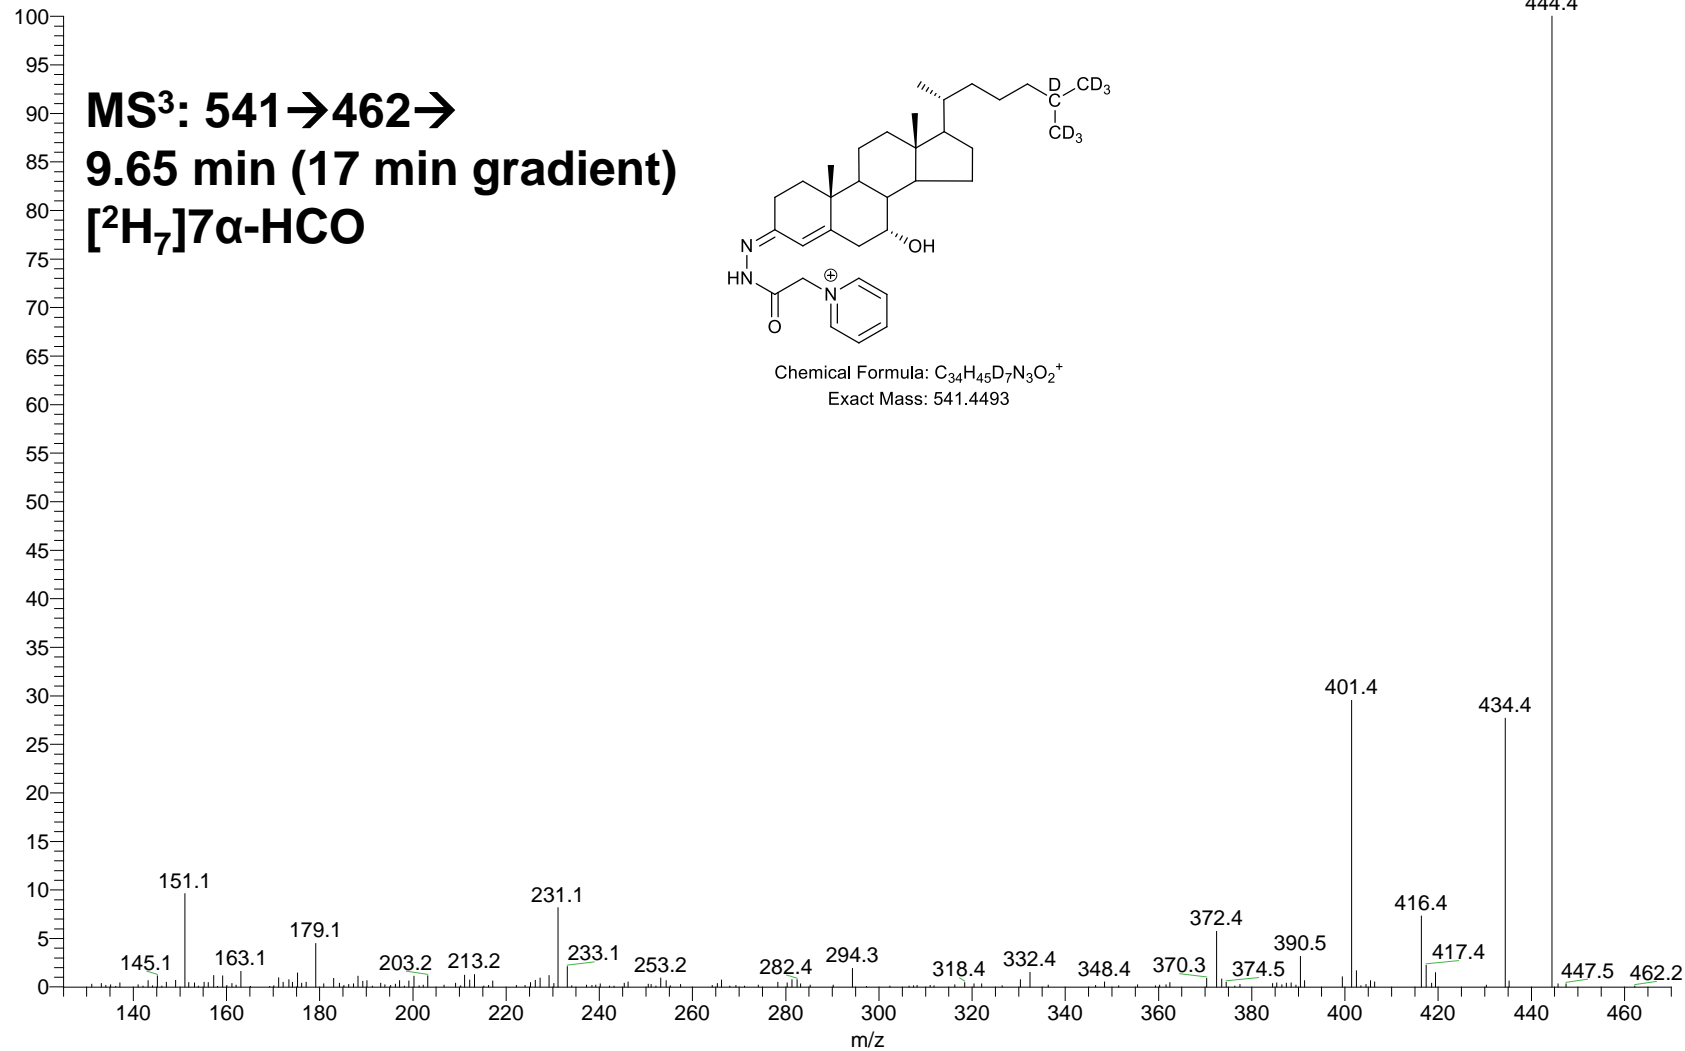

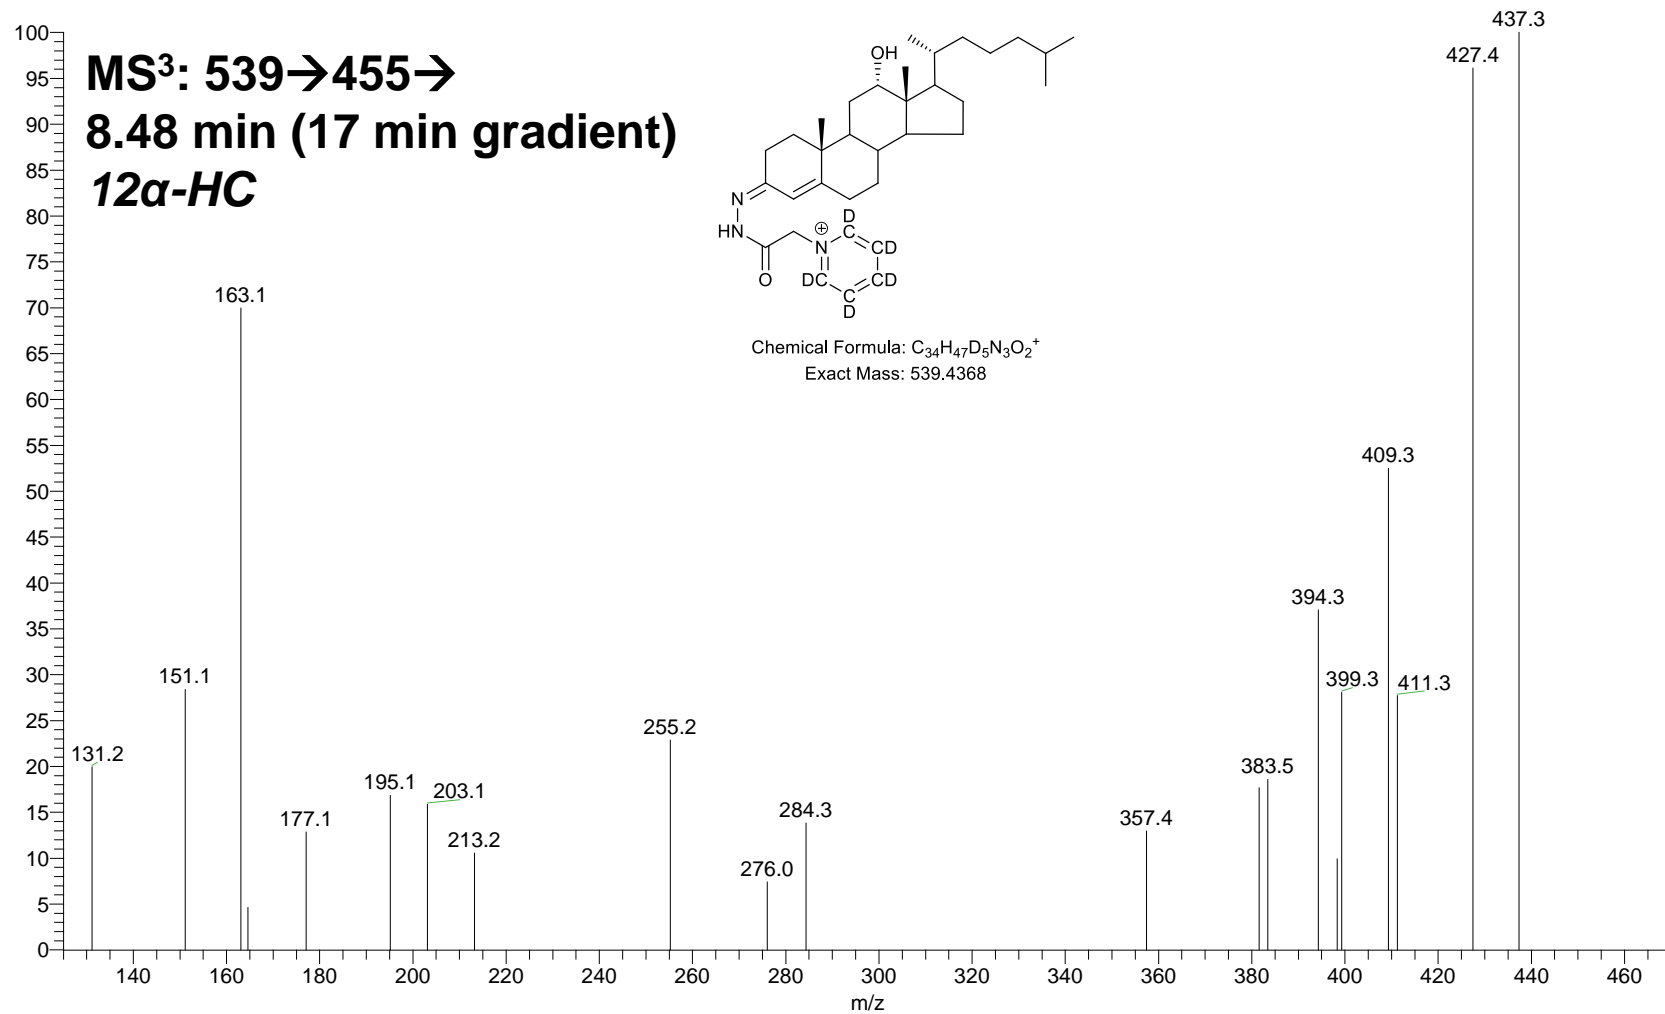



RT: 0.00 - 37.01

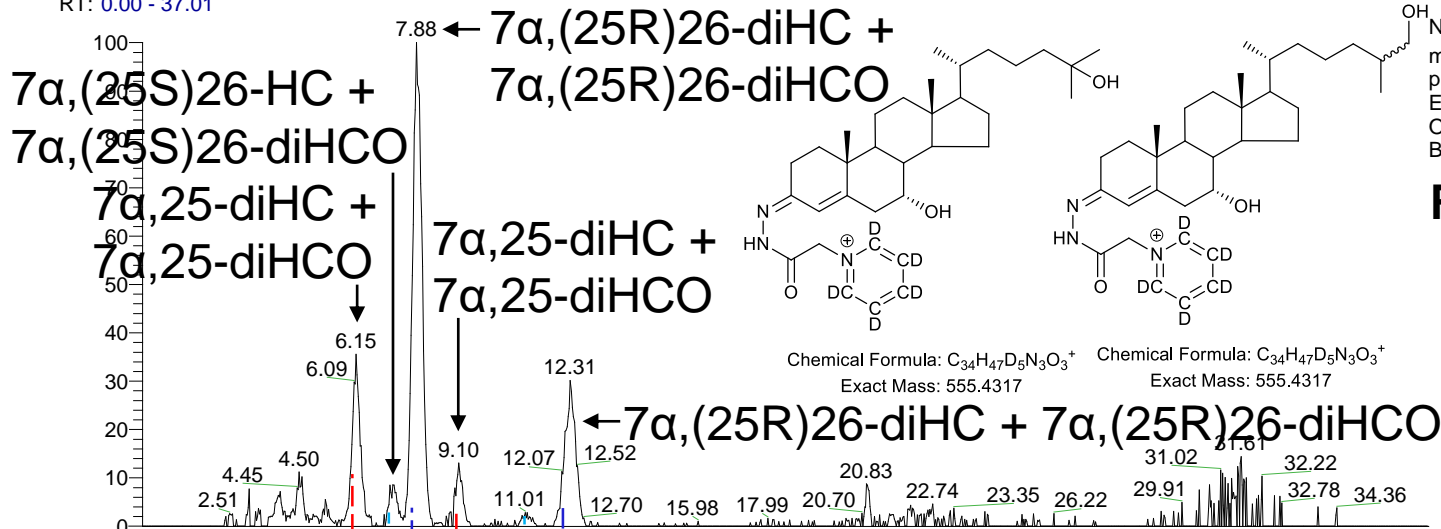

NL: 3.39E4  
m/z= 555.4289-555.4345 F: FTMS +  
p ESI Full ms [400.00-610.00] MS  
EY\_191014\_100uL-NIST-QC\_100uL-  
OxySplash\_rep2of5\_Fr1A=GPd5\_Fr1  
B=GPd0\_s2\_03

**RIC: 555.4317**

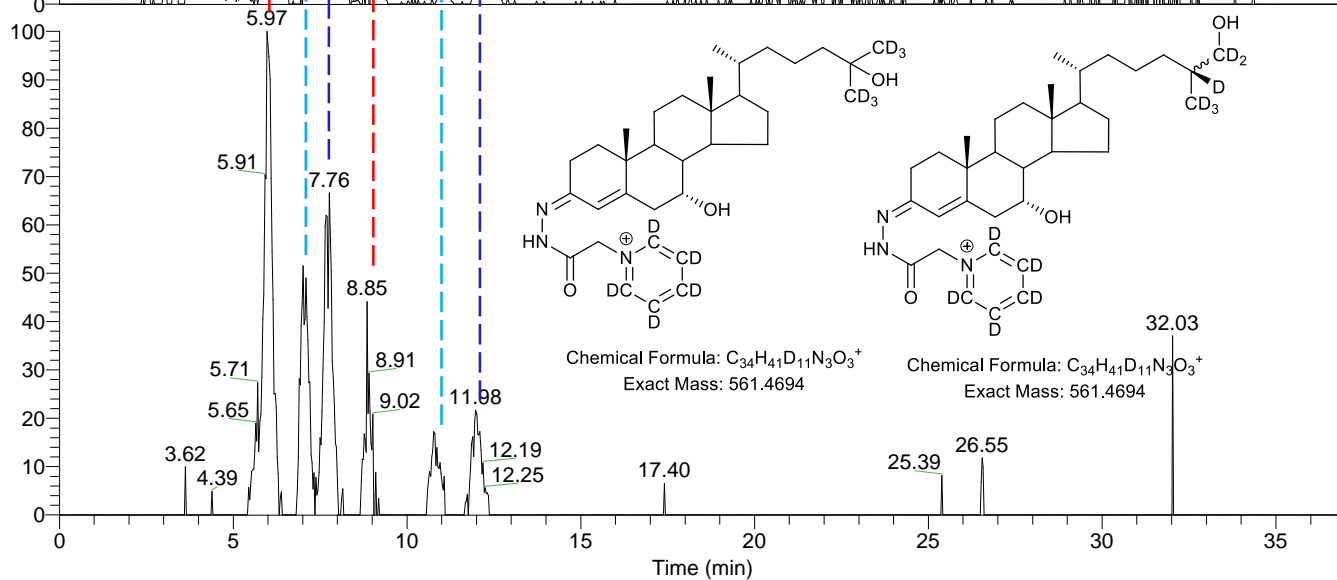

NL: 6.79E3  
m/z= 561.4666-561.4722 F: FTMS +  
p ESI Full ms [400.00-610.00] MS  
EY\_191014\_100uL-NIST-QC\_100uL-  
OxySplash\_rep2of5\_Fr1A=GPd5\_Fr1  
B=GPd0\_s2\_03

**RIC: 561.4694**

RT: 0.00 - 37.01

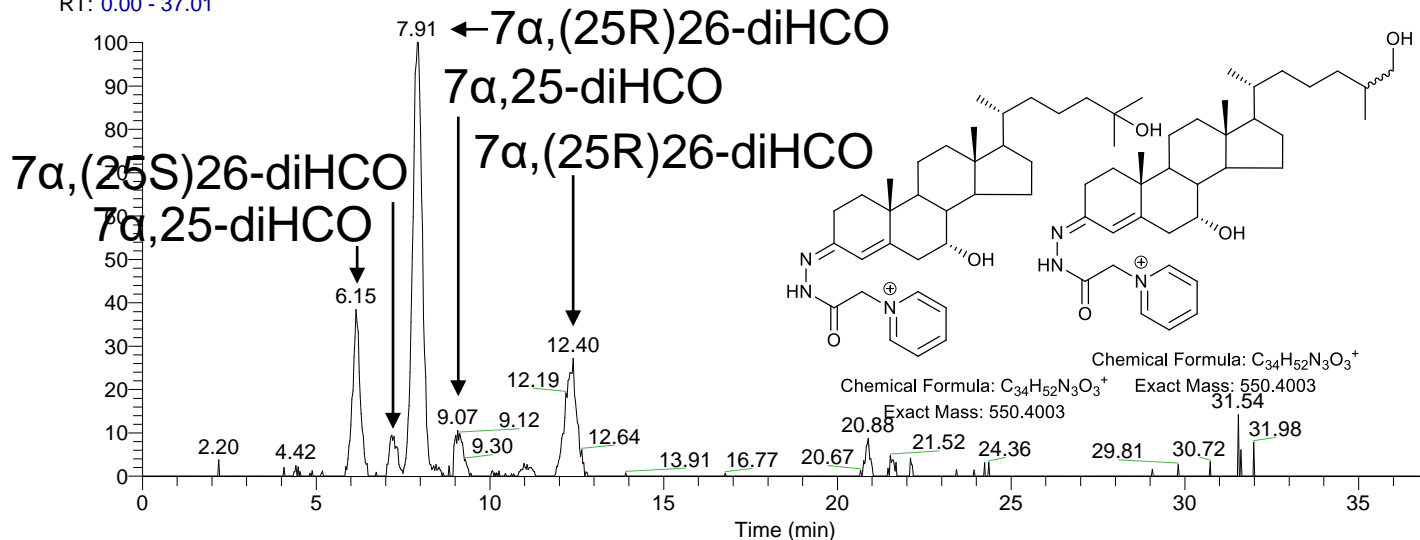

NL: 2.77E4  
m/z= 550.3975-550.4031 F: FTMS +  
p ESI Full ms [400.00-610.00] MS  
EY\_191014\_100uL-NIST-QC\_100uL-  
OxySplash\_rep2of5\_Fr1A=GPd5\_Fr1  
B=GPd0\_s2\_03

**RIC: 550.4003**

RT: 0.00 - 17.00

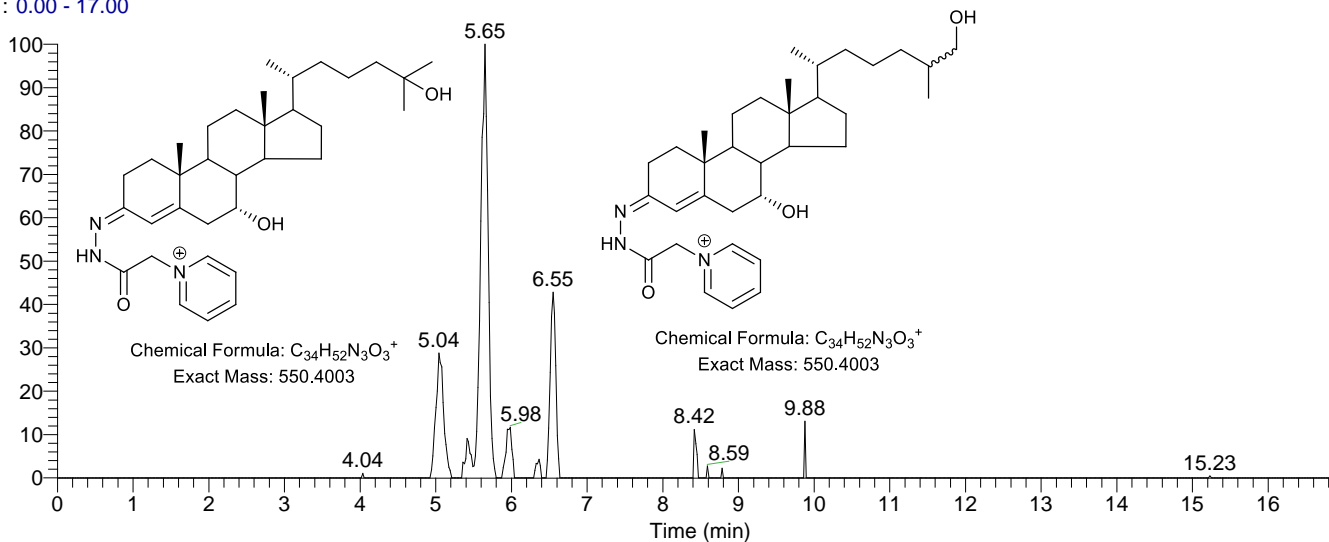

NL: 3.82E4  
m/z= 550.3975-550.4031 F: FTMS +  
p ESI Full ms [400.00-610.00] MS  
EY\_191014\_100uL-NIST-QC\_100uL-  
OxySplash\_rep2of5\_Fr1A=GPd5\_Fr1  
B=GPd0\_s2\_04

**RIC: 550.4003**

RT: 0.00 - 37.01

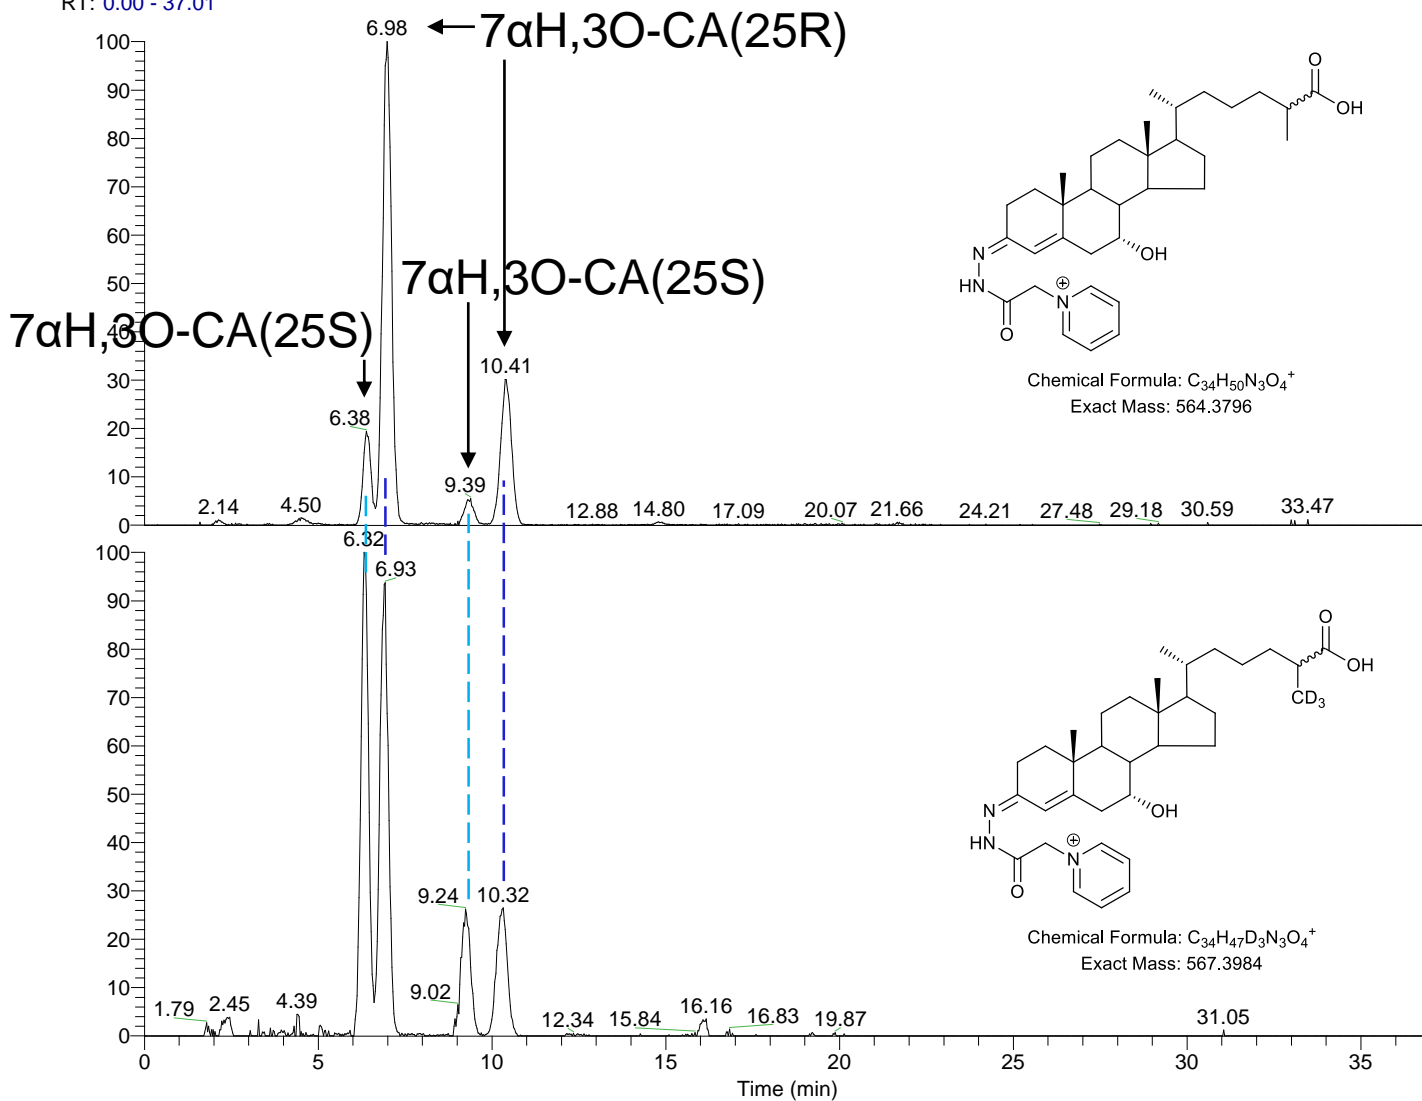

NL: 2.51E5  
 m/z= 564.3768-564.3824 F: FTMS +  
 p ESI Full ms [400.00-610.00] MS  
 EY\_191014\_100uL-NIST-QC\_100uL-  
 OxySplash\_rep2of5\_Fr1A=GPd5\_Fr1  
 B=GPd0\_s2\_03

**RIC: 564.3796**

NL: 1.23E5  
 m/z= 567.3956-567.4012 F: FTMS +  
 p ESI Full ms [400.00-610.00] MS  
 EY\_191014\_100uL-NIST-QC\_100uL-  
 OxySplash\_rep2of5\_Fr1A=GPd5\_Fr1  
 B=GPd0\_s2\_03

**RIC: 567.3984**

RT: 0.00 - 37.01

NL: 3.58E5  
m/z= 569.4082-569.4138 F: FTMS +  
p ESI Full ms [400.00-610.00] MS  
EY\_191014\_100uL-NIST-QC\_100uL-  
OxySplash\_rep2of5\_Fr1A=GPd5\_Fr1  
B=GPd0\_s2\_03

**RIC: 569.4110**

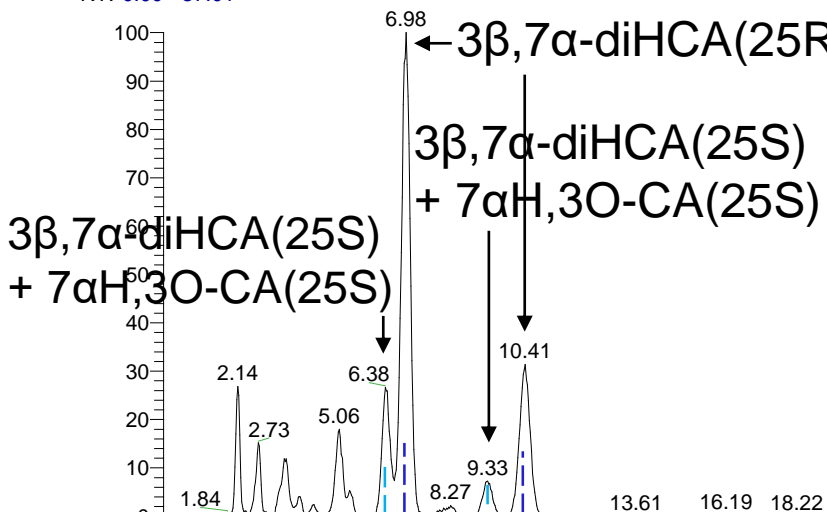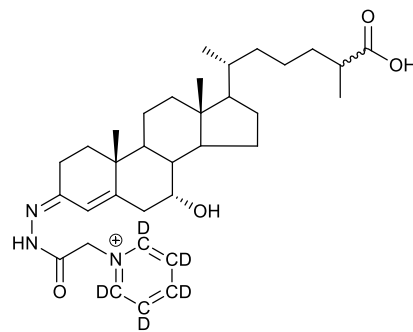

Chemical Formula: C<sub>34</sub>H<sub>45</sub>D<sub>5</sub>N<sub>3</sub>O<sub>4</sub><sup>+</sup>  
Exact Mass: 569.4110

NL: 1.28E5  
m/z= 572.4269-572.4327 F: FTMS +  
p ESI Full ms [400.00-610.00] MS  
EY\_191014\_100uL-NIST-QC\_100uL-  
OxySplash\_rep2of5\_Fr1A=GPd5\_Fr1  
B=GPd0\_s2\_03

**RIC: 572.4298**

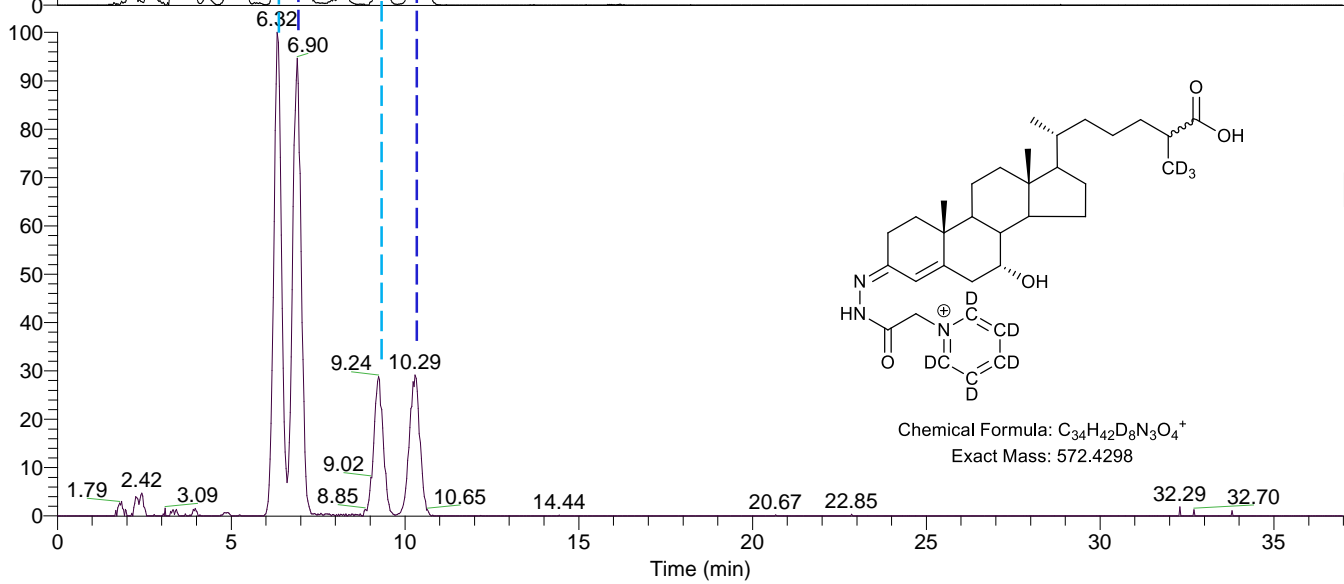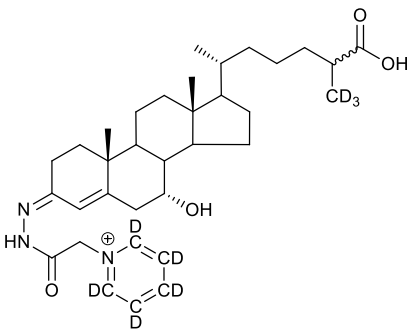

Chemical Formula: C<sub>34</sub>H<sub>42</sub>D<sub>8</sub>N<sub>3</sub>O<sub>4</sub><sup>+</sup>  
Exact Mass: 572.4298

EY\_191014\_100uL-NIST-QC\_100uL-OxySpla... 10/15/19 03:26:25  
100uL NIST (2018) + 100ul OxysterolSPLASH + 10ng 22S-HCO-D7 + 20ug  
EY\_191014\_100uL-NIST-QC\_100uL-OxySplash\_rep2of5\_Fr1A=GPd5\_Fr1E  
F: ITMS + c ESI Full ms3 555.43@cid30.00 471.36@cid35.00 [125.00-560.00]

5.03 AV: 1 NL: 2.77E3

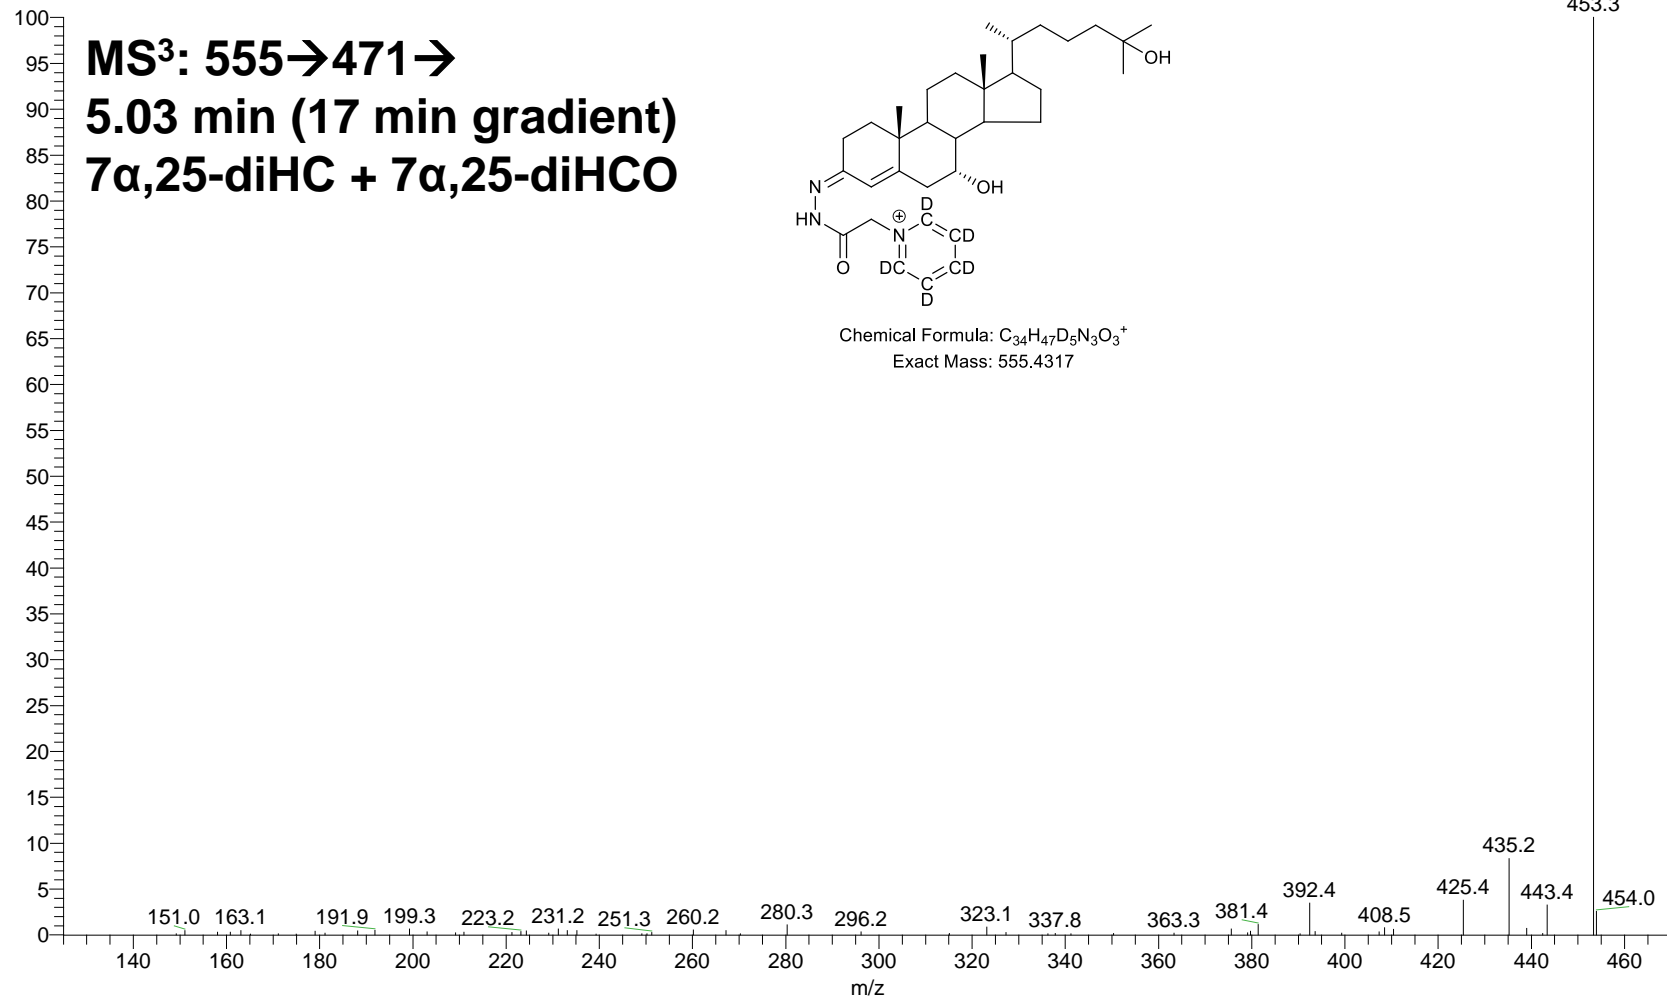

EY\_191014\_100uL-NIST-QC\_100uL-OxySpla... 10/15/19 03:26:25  
100uL NIST (2018) + 100ul OxysterolSPLASH + 10ng 22S-HCO-D7 + 20ug  
EY\_191014\_100uL-NIST-QC\_100uL-OxySplash\_rep2of5\_Fr1A=GPd5\_Fr1E  
F: ITMS + c ESI Full ms3 561.47@cid30.00 477.40@cid35.00 [130.00-570.00]

4.97 AV: 1 NL: 1.29E3

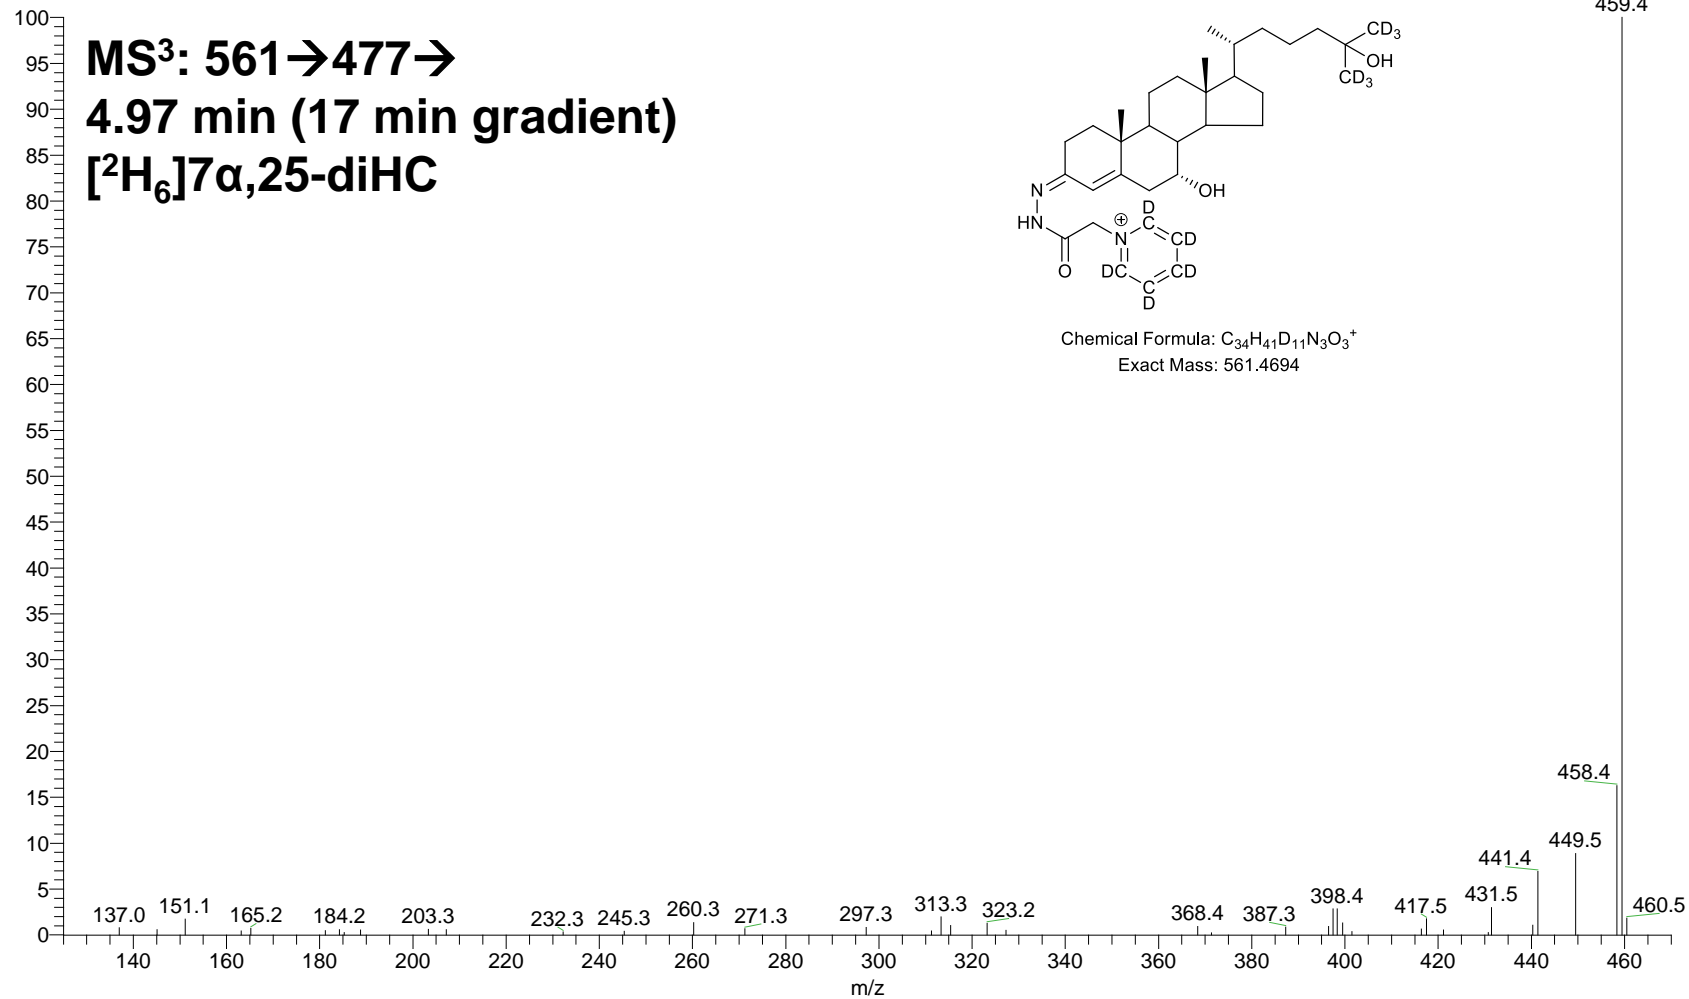

EY\_191014\_100uL-NIST-QC\_100uL-OxySpla... 10/15/19 03:26:25  
100uL NIST (2018) + 100ul OxysterolSPLASH + 10ng 22S-HCO-D7 + 20ug  
EY\_191014\_100uL-NIST-QC\_100uL-OxySplash\_rep2of5\_Fr1A=GPd5\_Fr1E  
F: ITMS + c ESI Full ms3 555.43@cid30.00 471.36@cid35.00 [125.00-560.00]

5.43 AV: 1 NL: 5.27E2

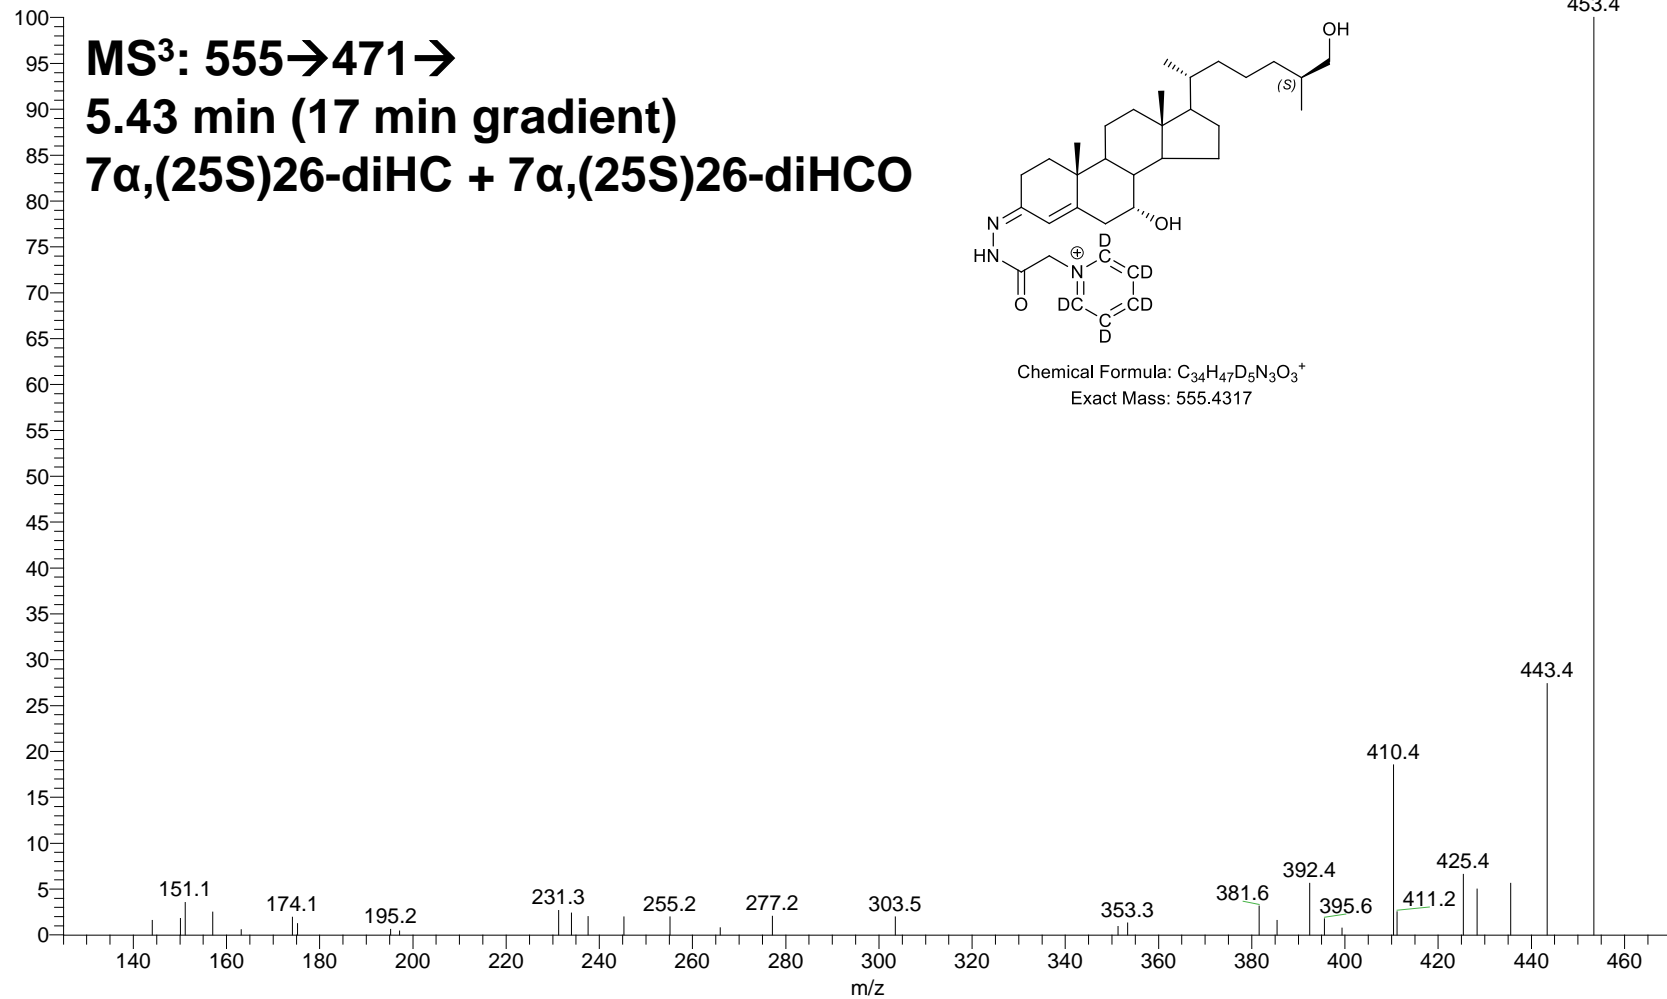

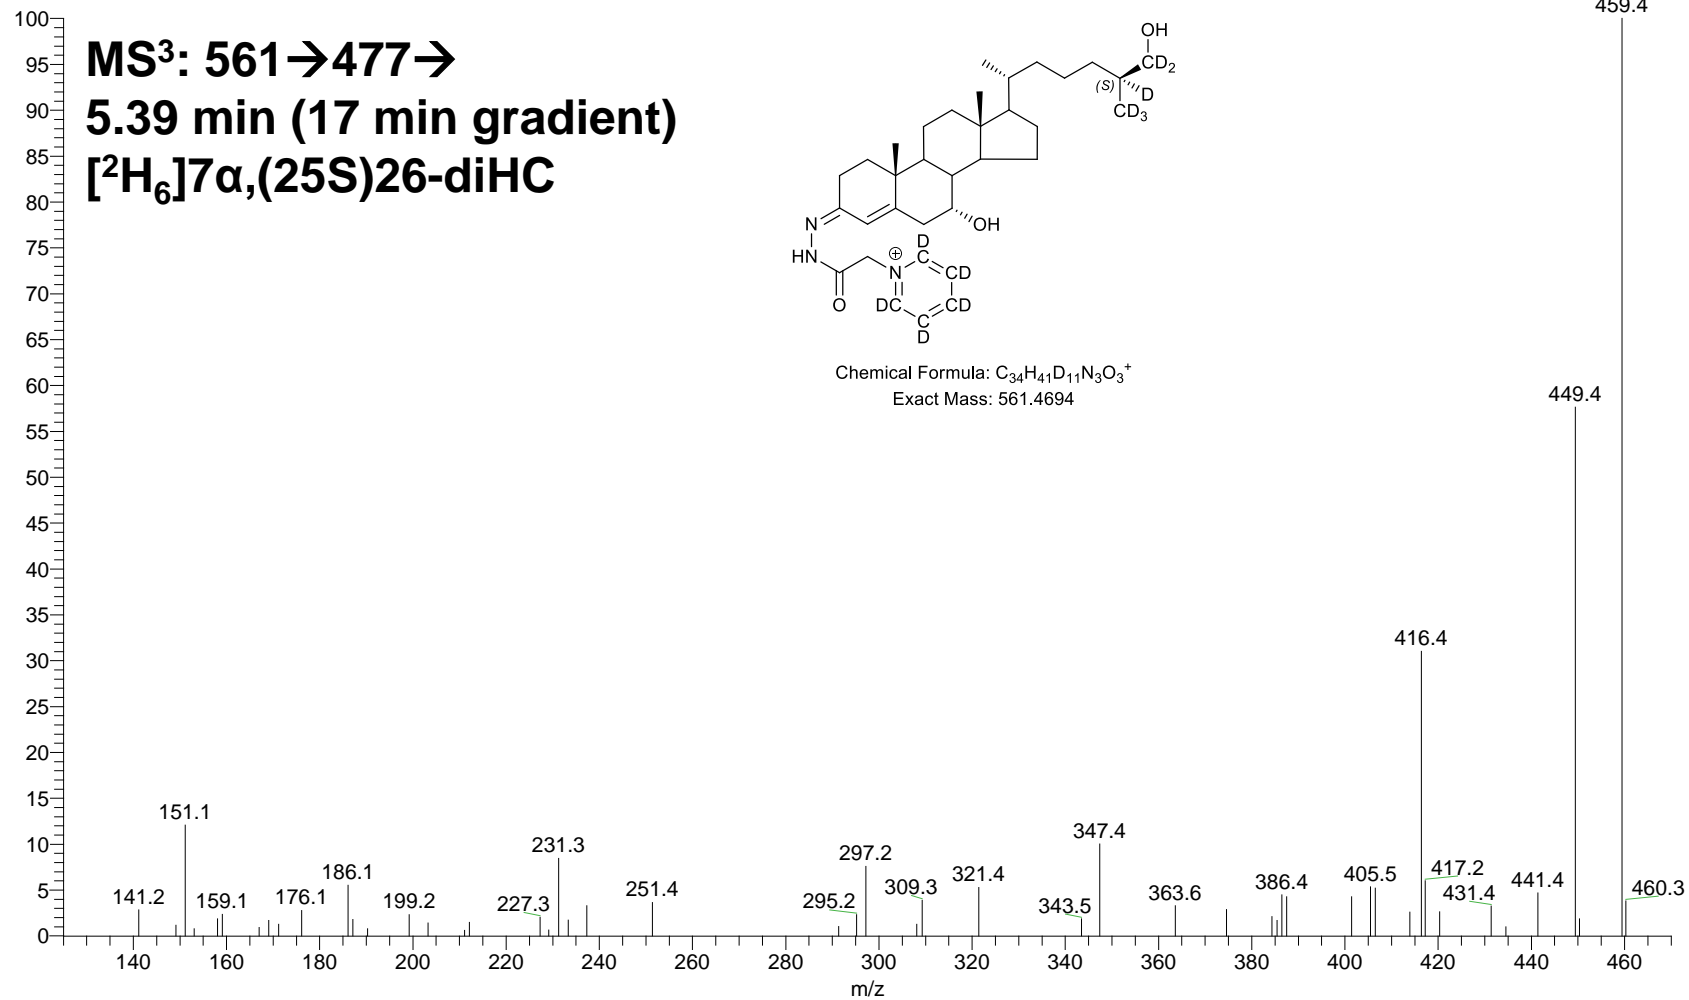



EY\_191014\_100uL-NIST-QC\_100uL-OxySpla... 10/15/19 03:26:25  
100uL NIST (2018) + 100ul OxysterolSPLASH + 10ng 22S-HCO-D7 + 20ug  
EY\_191014\_100uL-NIST-QC\_100uL-OxySplash\_rep2of5\_Fr1A=GPd5\_Fr1E  
F: ITMS + c ESI Full ms3 555.43@cid30.00 471.36@cid35.00 [125.00-560.00]

5.64 AV: 1 NL: 3.64E3

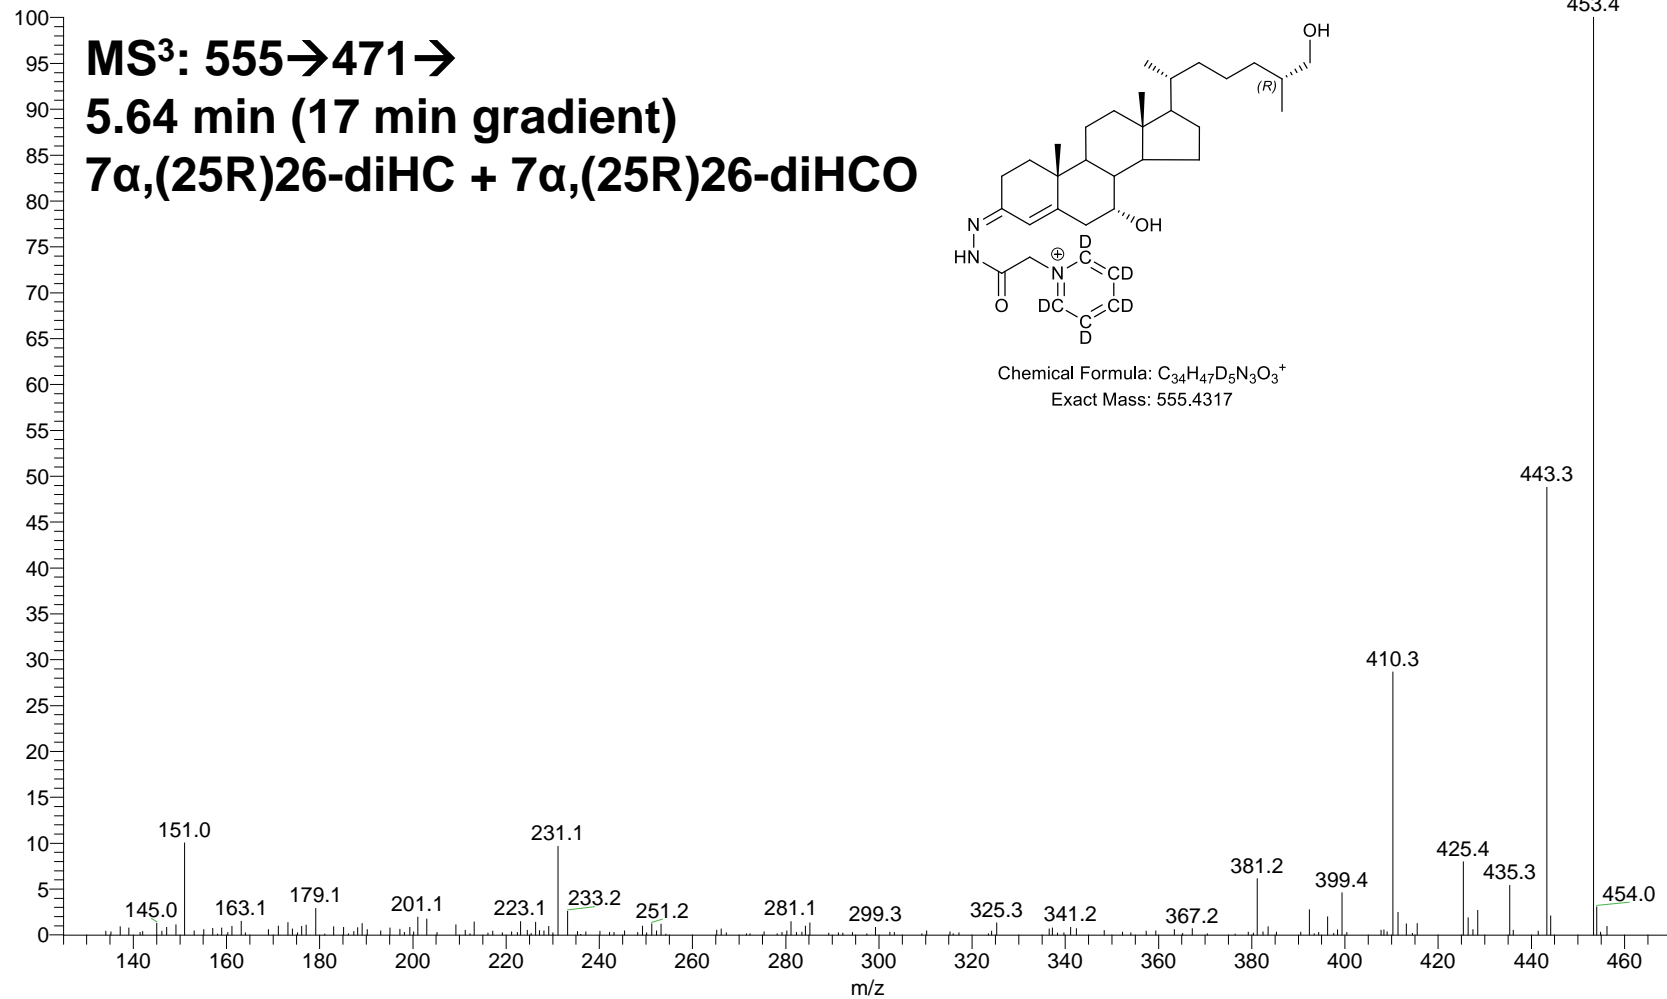

EY\_191014\_100uL-NIST-QC\_100uL-OxySpla... 10/15/19 03:26:25  
100uL NIST (2018) + 100ul OxysterolSPLASH + 10ng 22S-HCO-D7 + 20ug  
EY\_191014\_100uL-NIST-QC\_100uL-OxySplash\_rep2of5\_Fr1A=GPd5\_Fr1E  
F: ITMS + c ESI Full ms3 561.47@cid30.00 477.40@cid35.00 [130.00-570.00]

5.59 AV: 1 NL: 4.27E2

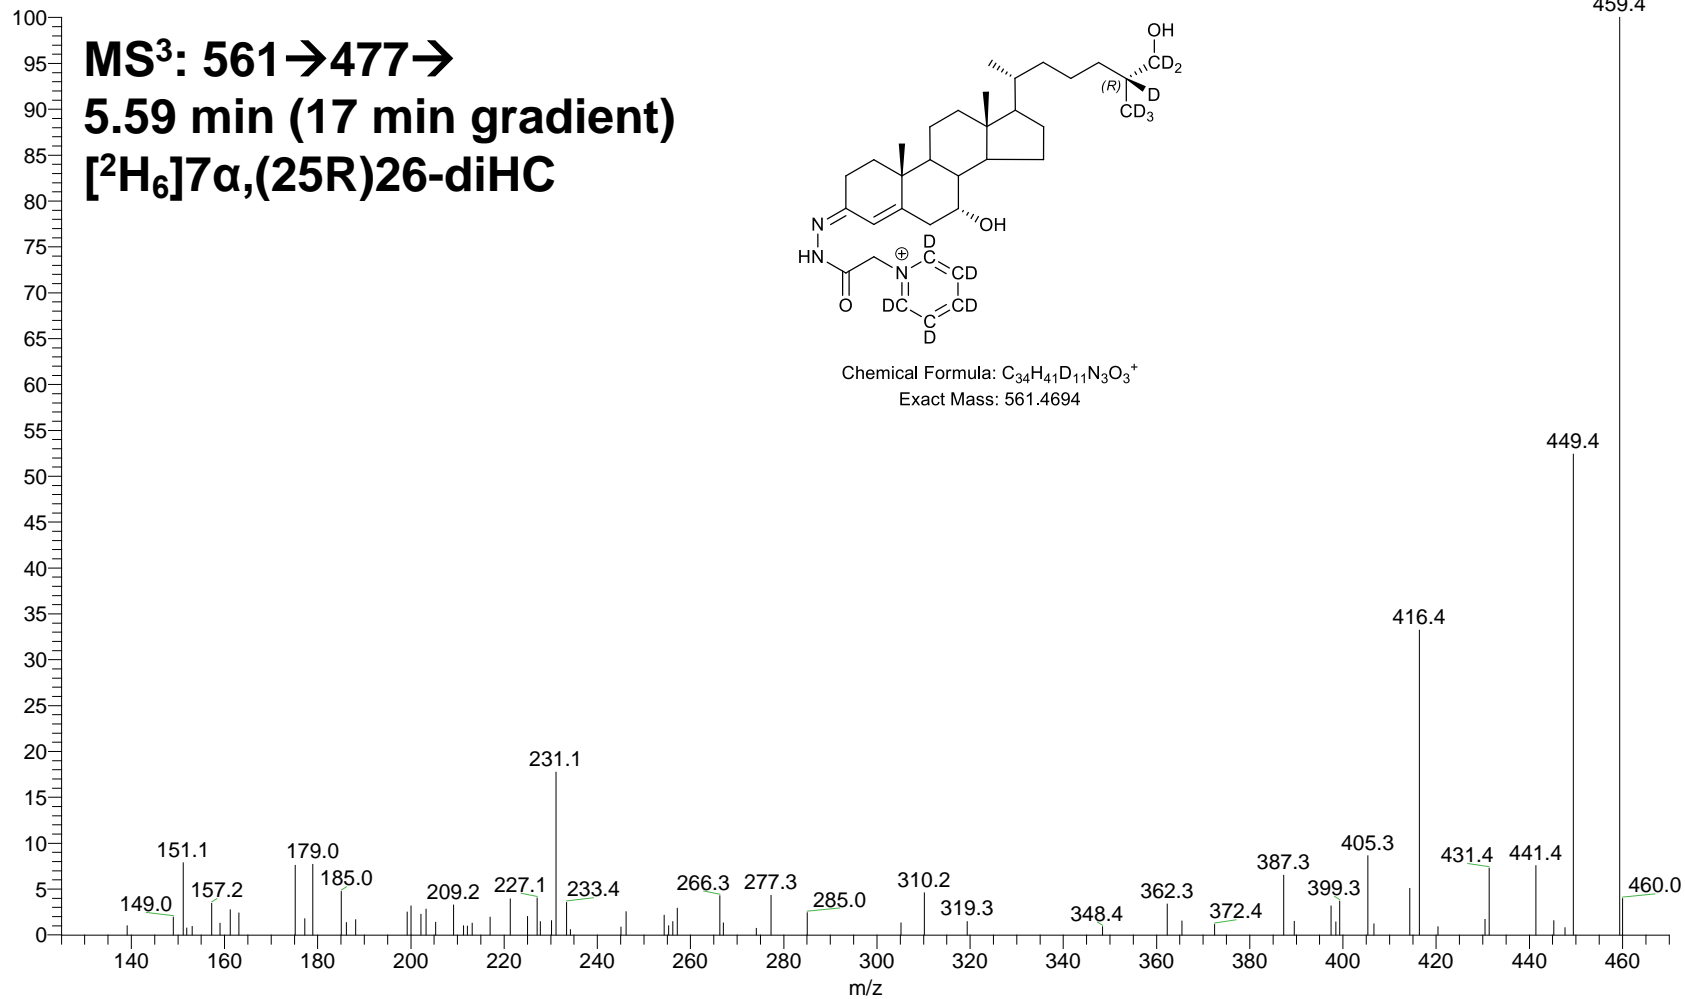

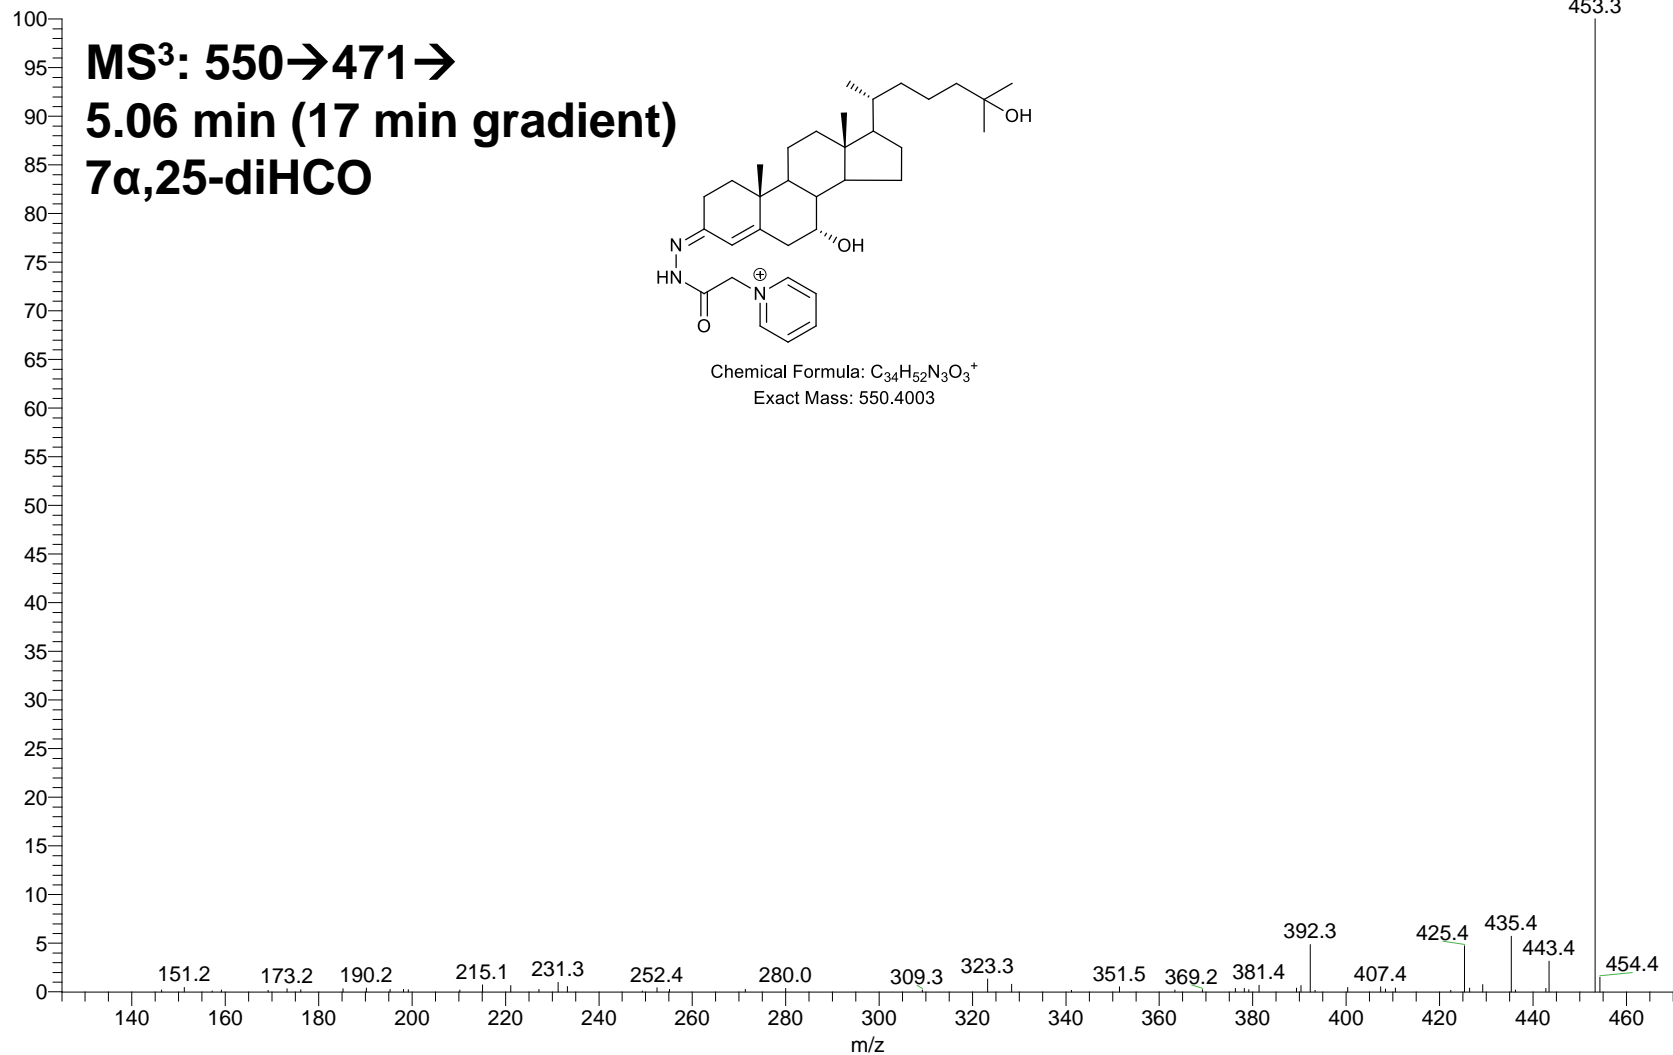

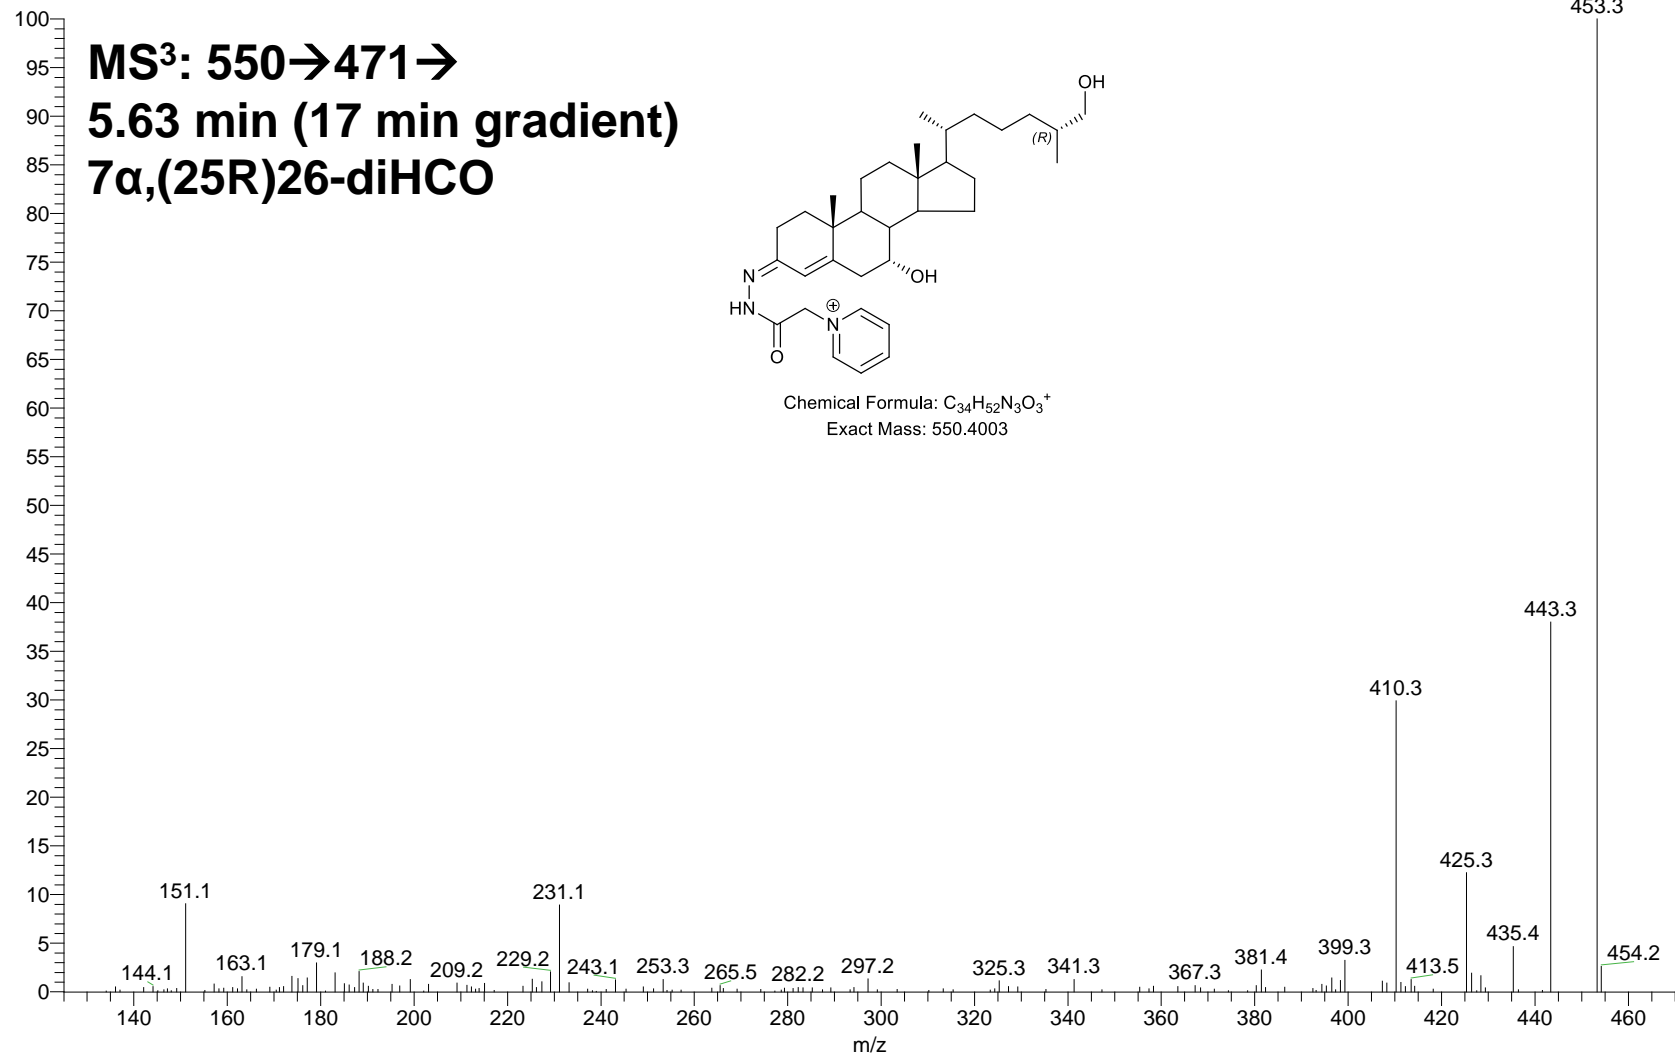

EY\_191014\_100uL-NIST-QC\_100uL-OxySpla... 10/15/19 03:26:25  
100uL NIST (2018) + 100ul OxysterolSPLASH + 10ng 22S-HCO-D7 + 20ug  
EY\_191014\_100uL-NIST-QC\_100uL-OxySplash\_rep2of5\_Fr1A=GPd5\_Fr1E  
F: ITMS + c ESI Full ms3 555.43@cid30.00 471.36@cid35.00 [125.00-560.00]

8.41 AV: 1 NL: 2.53E2

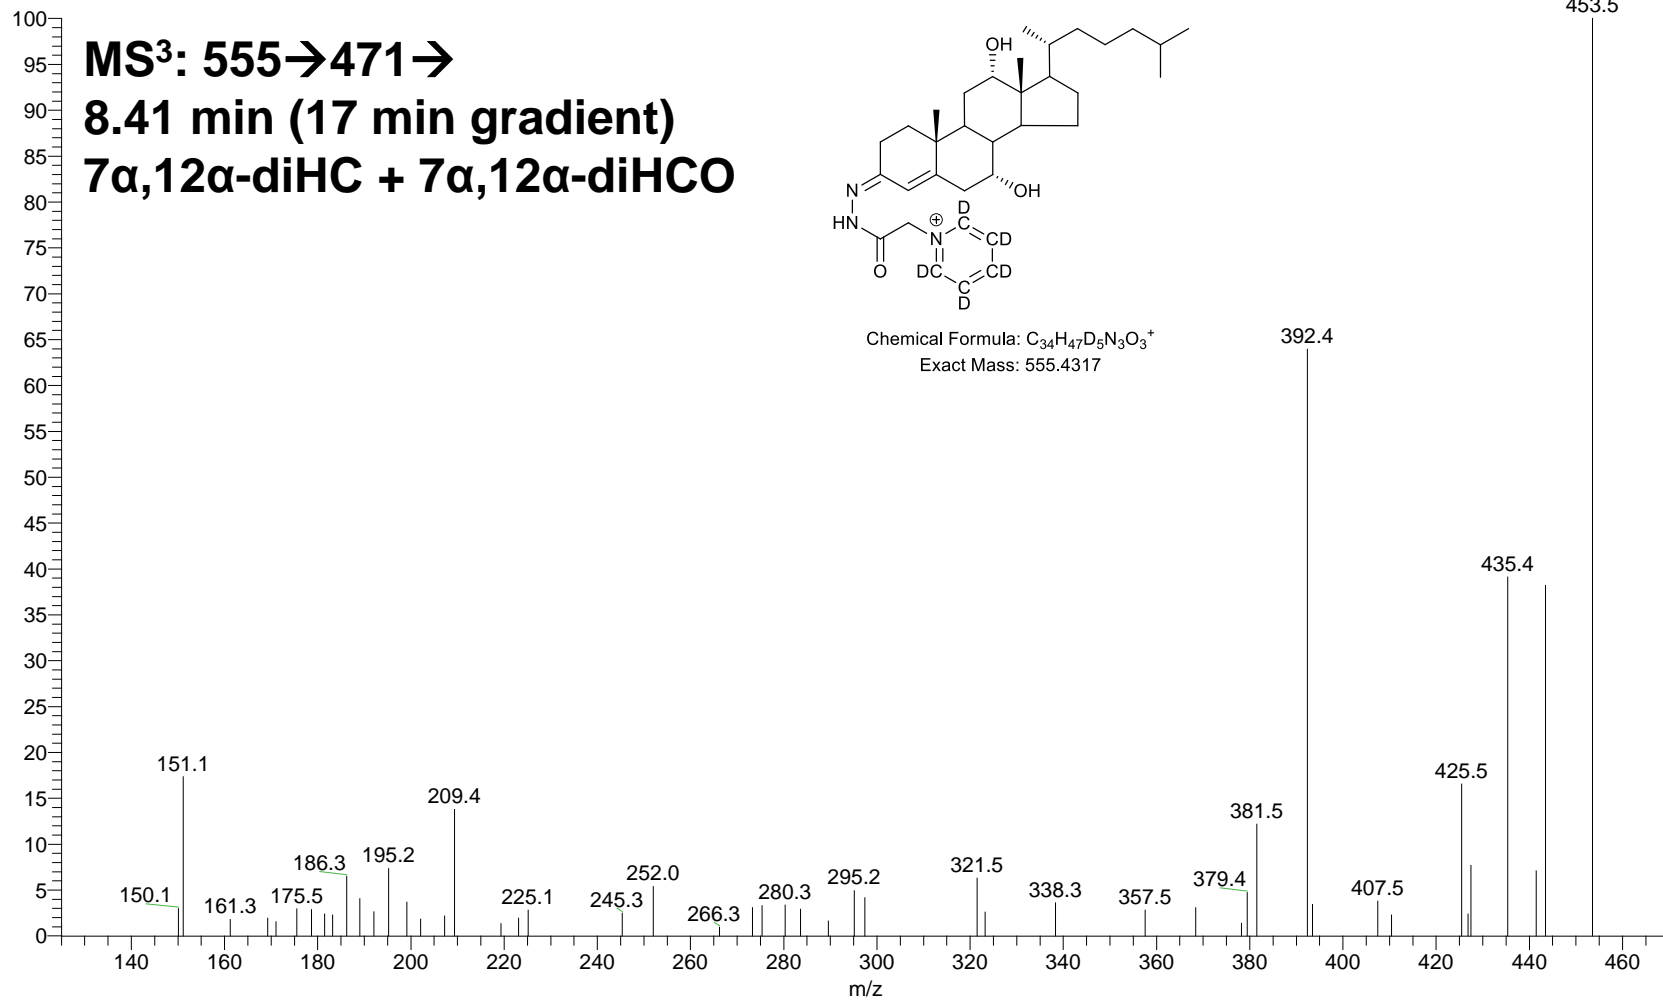

EY\_191014\_100uL-NIST-QC\_100uL-OxySpla... 10/15/19 03:47:11  
100uL NIST (2018) + 100ul OxysterolSPLASH + 10ng 22S-HCO-D7 + 20ug  
EY\_191014\_100uL-NIST-QC\_100uL-OxySplash\_rep2of5\_Fr1A=GPd5\_Fr1E  
F: ITMS + c ESI Full ms3 569.41@cid30.00 485.34@cid35.00 [130.00-575.00]

.29 AV: 1 NL: 1.23E3

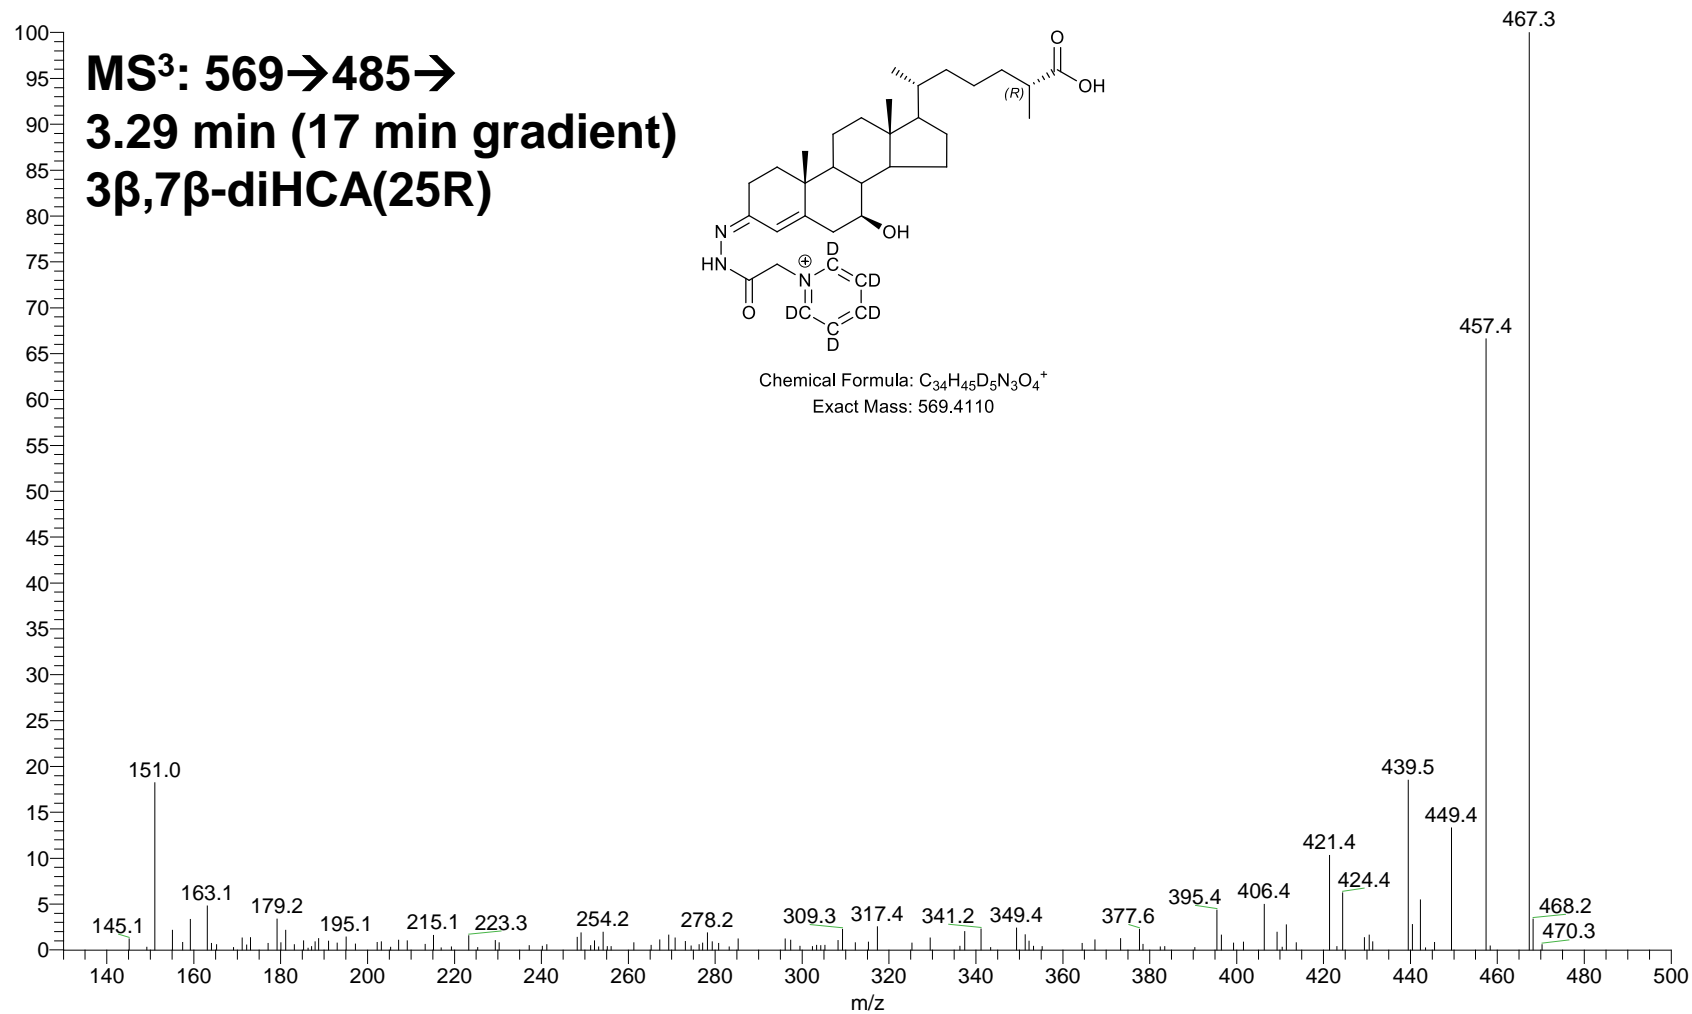

EY\_191014\_100uL-NIST-QC\_100uL-OxySpla... 10/15/19 03:47:11  
100uL NIST (2018) + 100ul OxysterolSPLASH + 10ng 22S-HCO-D7 + 20ug  
EY\_191014\_100uL-NIST-QC\_100uL-OxySplash\_rep2of5\_Fr1A=GPd5\_Fr1E  
F: ITMS + c ESI Full ms3 569.41@cid30.00 485.34@cid35.00 [130.00-575.00]

5.13 AV: 1 NL: 7.92E3

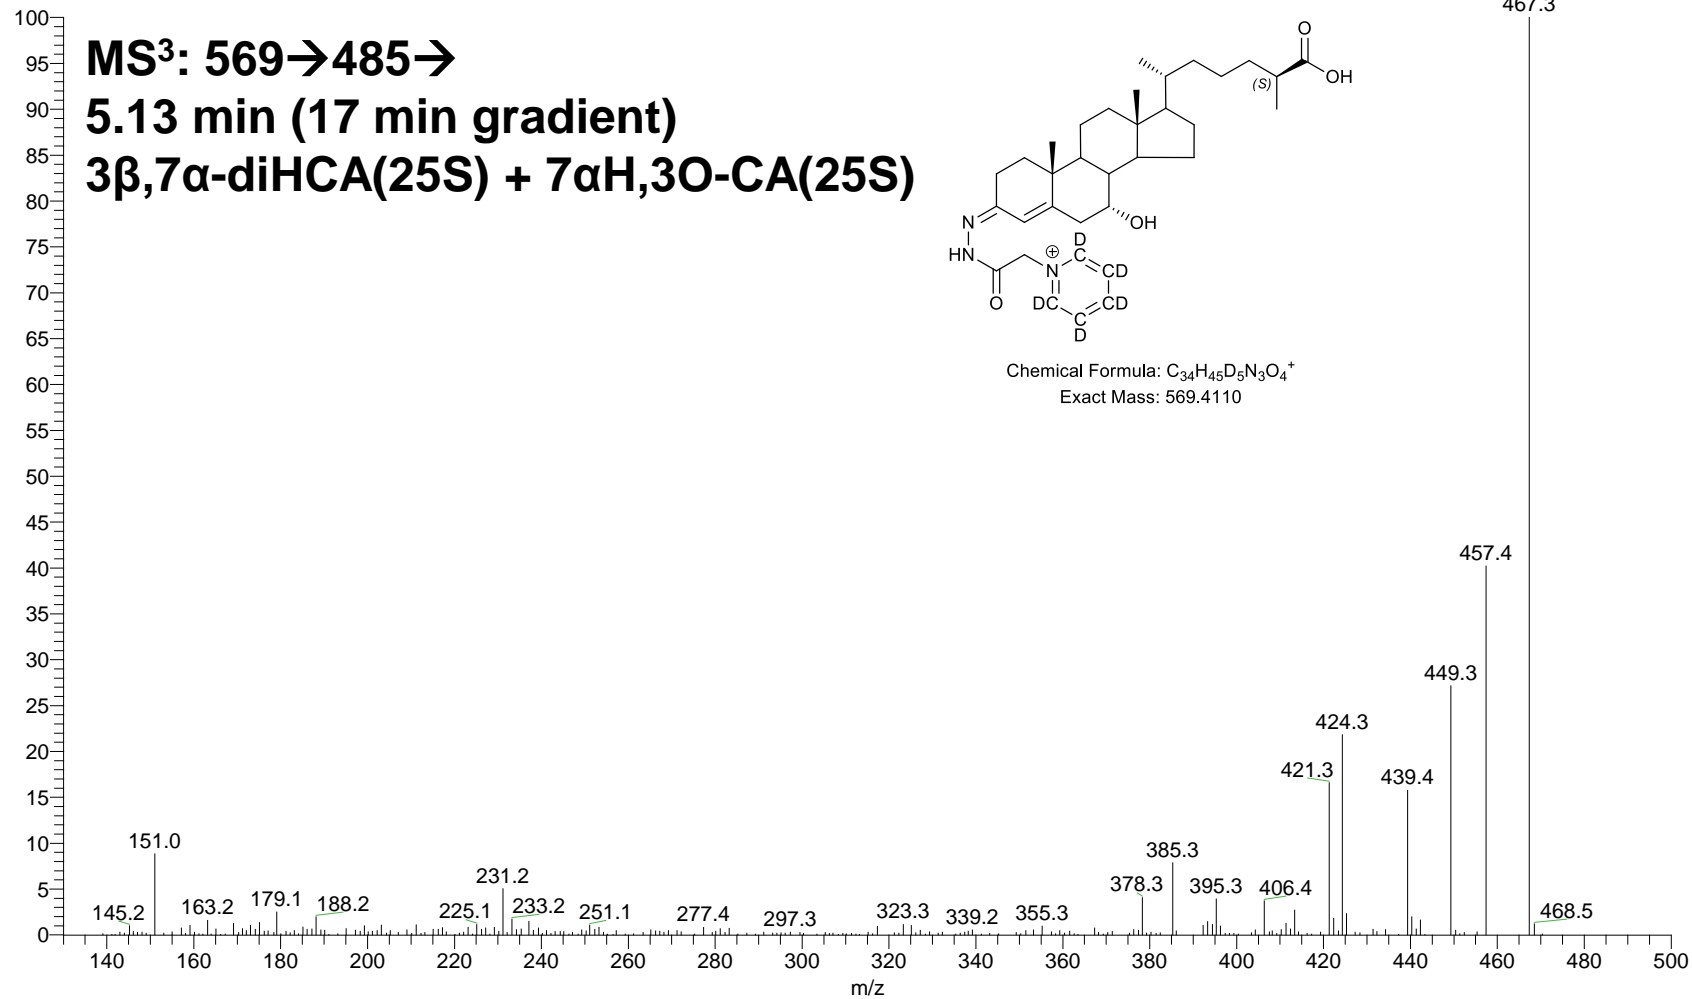

EY\_191014\_100uL-NIST-QC\_100uL-OxySpla... 10/15/19 03:47:11  
100uL NIST (2018) + 100ul OxysterolSPLASH + 10ng 22S-HCO-D7 + 20ug  
EY\_191014\_100uL-NIST-QC\_100uL-OxySplash\_rep2of5\_Fr1A=GPd5\_Fr1E  
F: ITMS + c ESI Full ms3 572.43@cid30.00 488.36@cid35.00 [130.00-580.00]

5.11 AV: 1 NL: 9.87E3

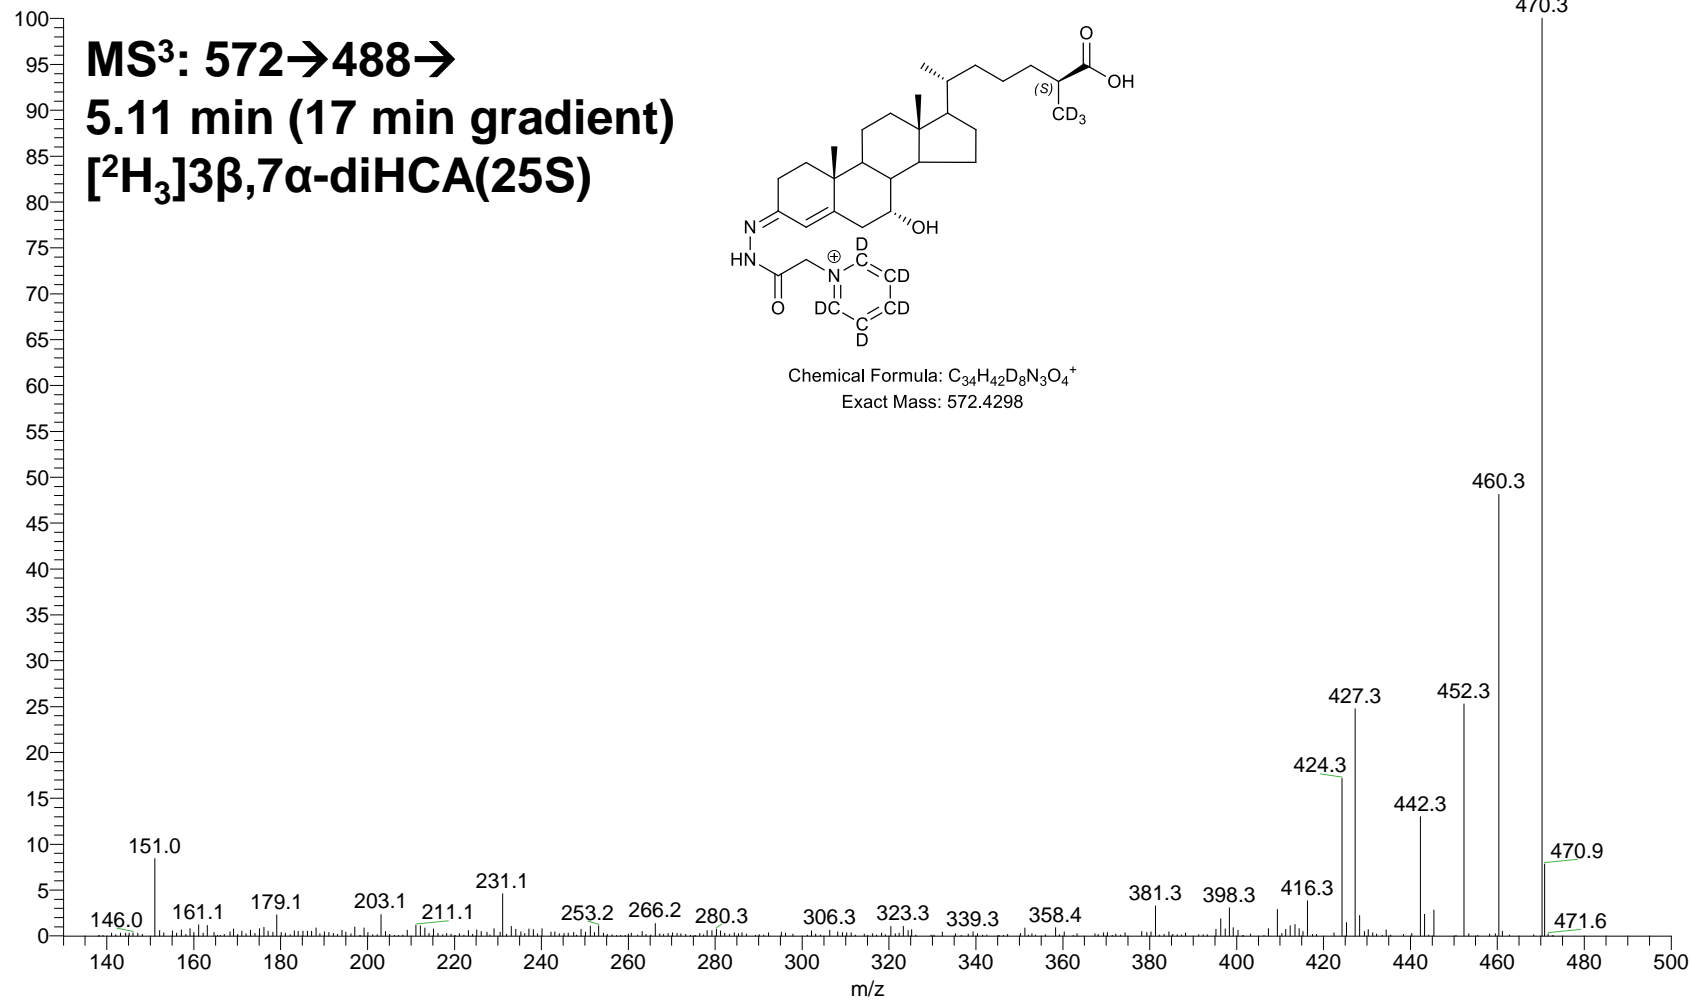



EY\_191014\_100uL-NIST-QC\_100uL-OxySpla... 10/15/19 03:47:11  
100uL NIST (2018) + 100ul OxysterolSPLASH + 10ng 22S-HCO-D7 + 20ug  
EY\_191014\_100uL-NIST-QC\_100uL-OxySplash\_rep2of5\_Fr1A=GPd5\_Fr1E  
F: ITMS + c ESI Full ms3 569.41@cid30.00 485.34@cid35.00 [130.00-575.00]

5.36 AV: 1 NL: 3.45E4

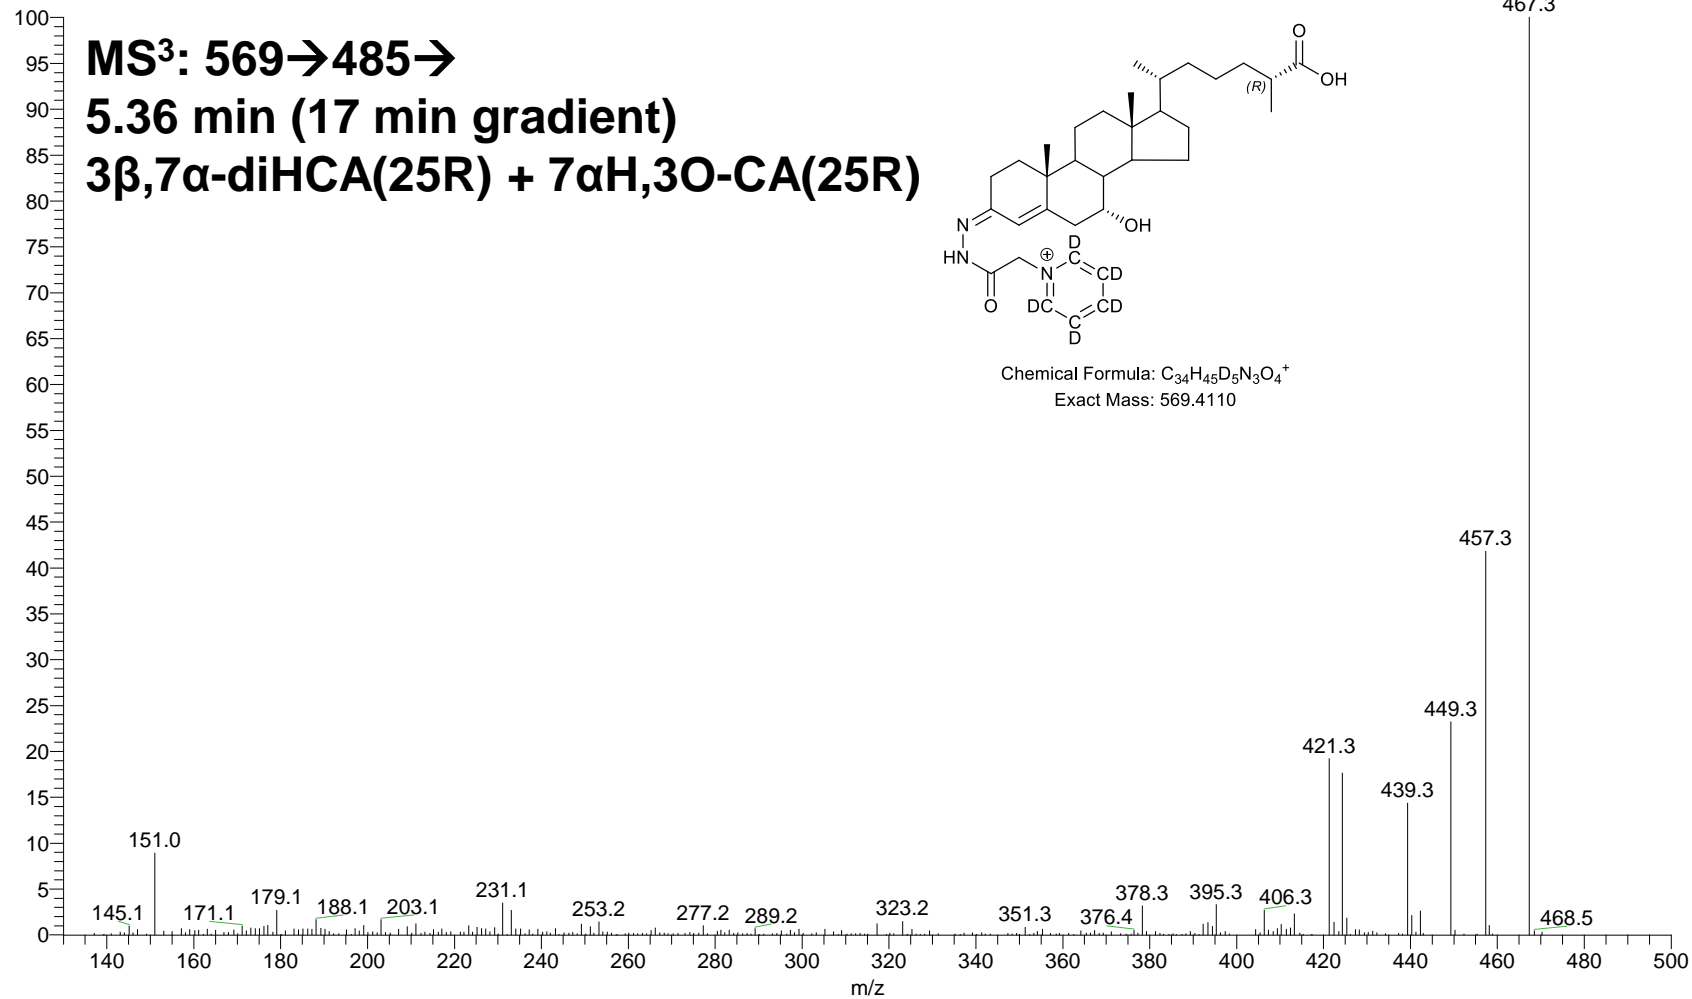

EY\_191014\_100uL-NIST-QC\_100uL-OxySpla... 10/15/19 03:47:11  
100uL NIST (2018) + 100ul OxysterolSPLASH + 10ng 22S-HCO-D7 + 20ug  
EY\_191014\_100uL-NIST-QC\_100uL-OxySplash\_rep2of5\_Fr1A=GPd5\_Fr1E  
F: ITMS + c ESI Full ms3 572.43@cid30.00 488.36@cid35.00 [130.00-580.00]

5.30 AV: 1 NL: 1.20E4

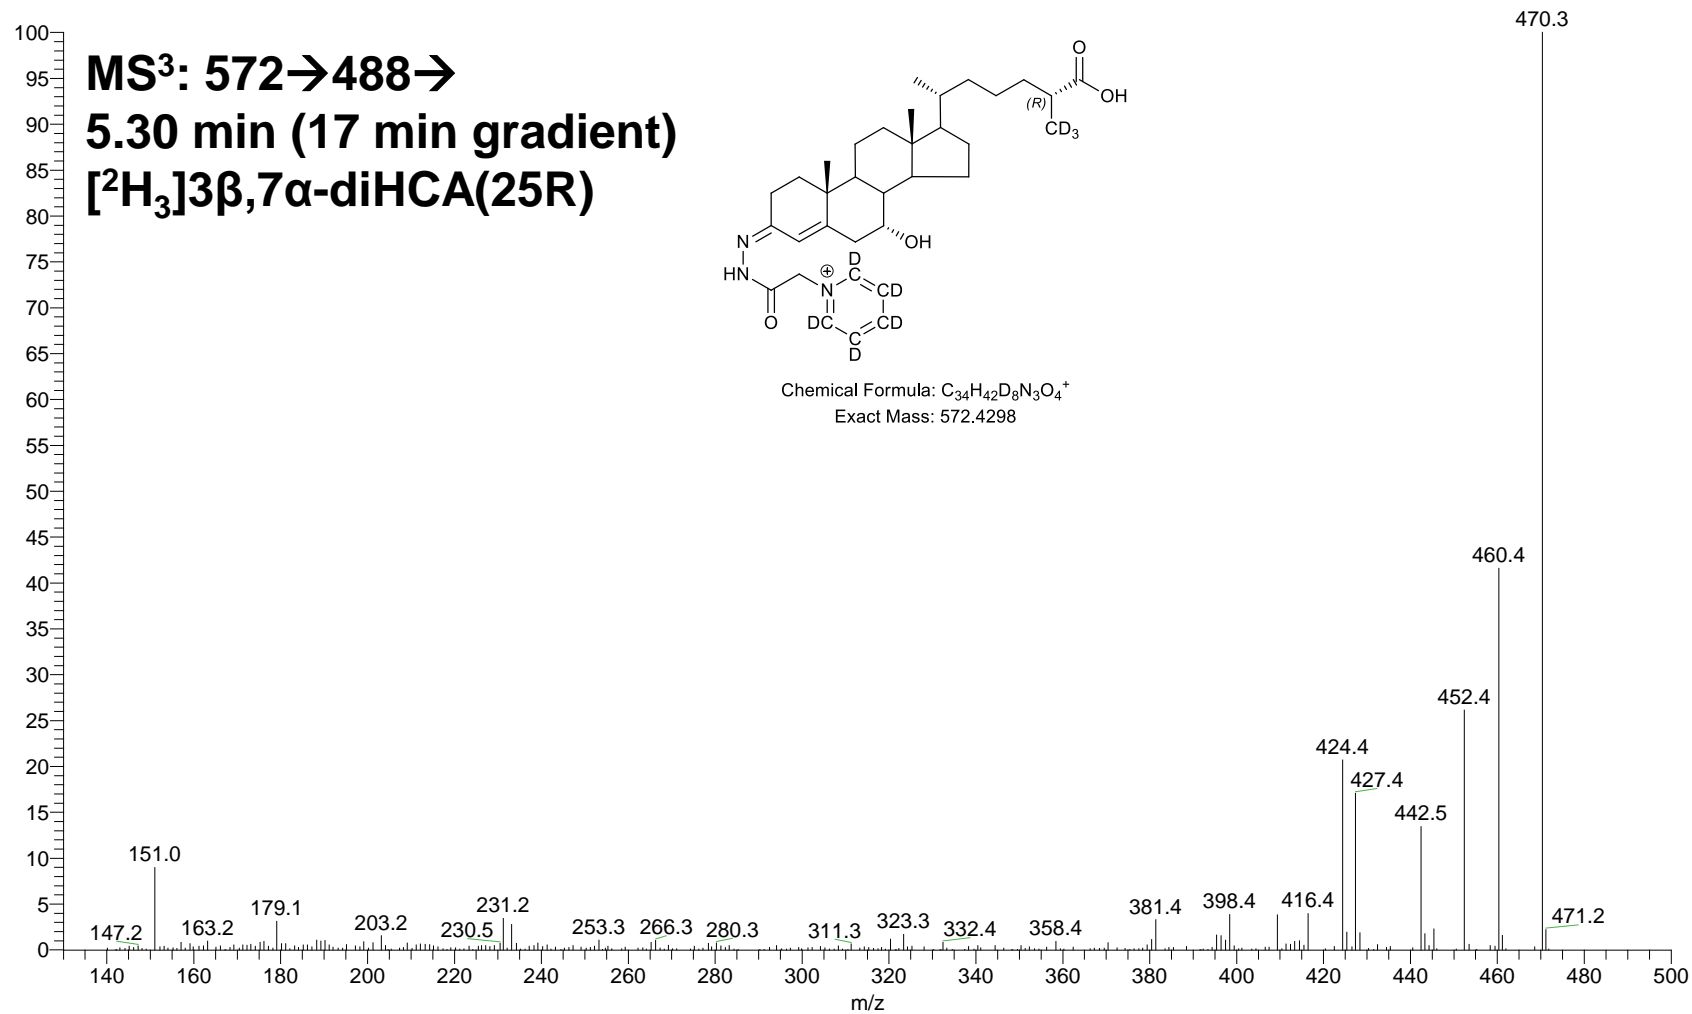

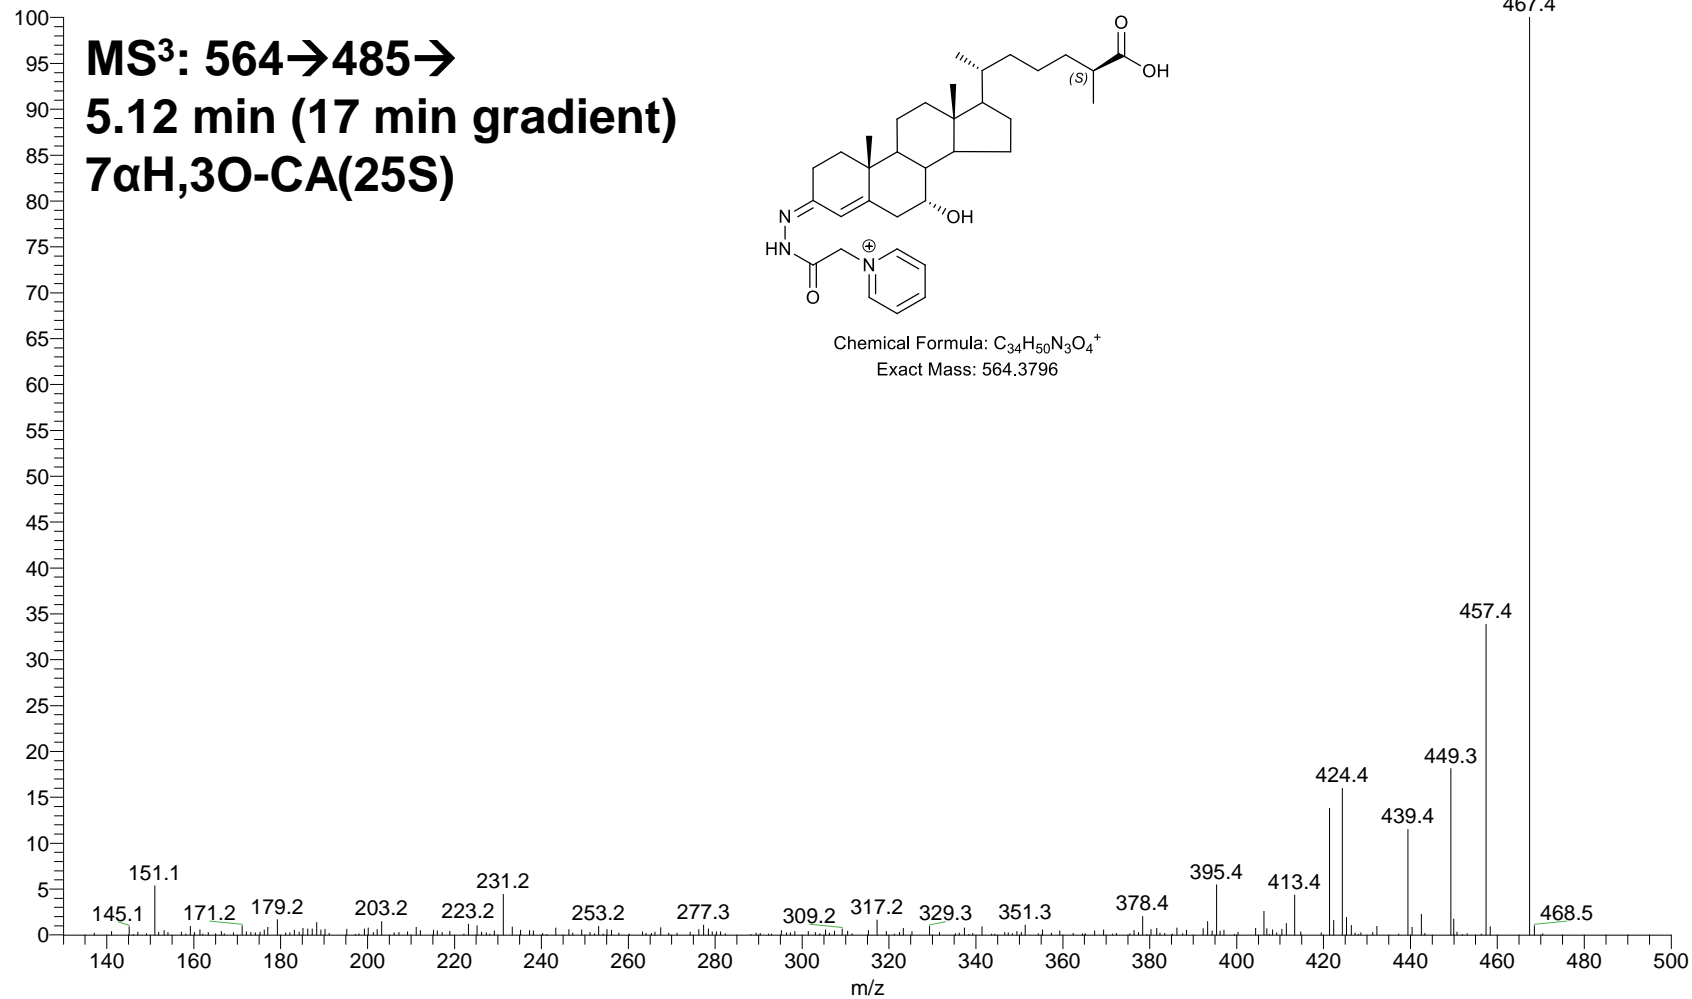

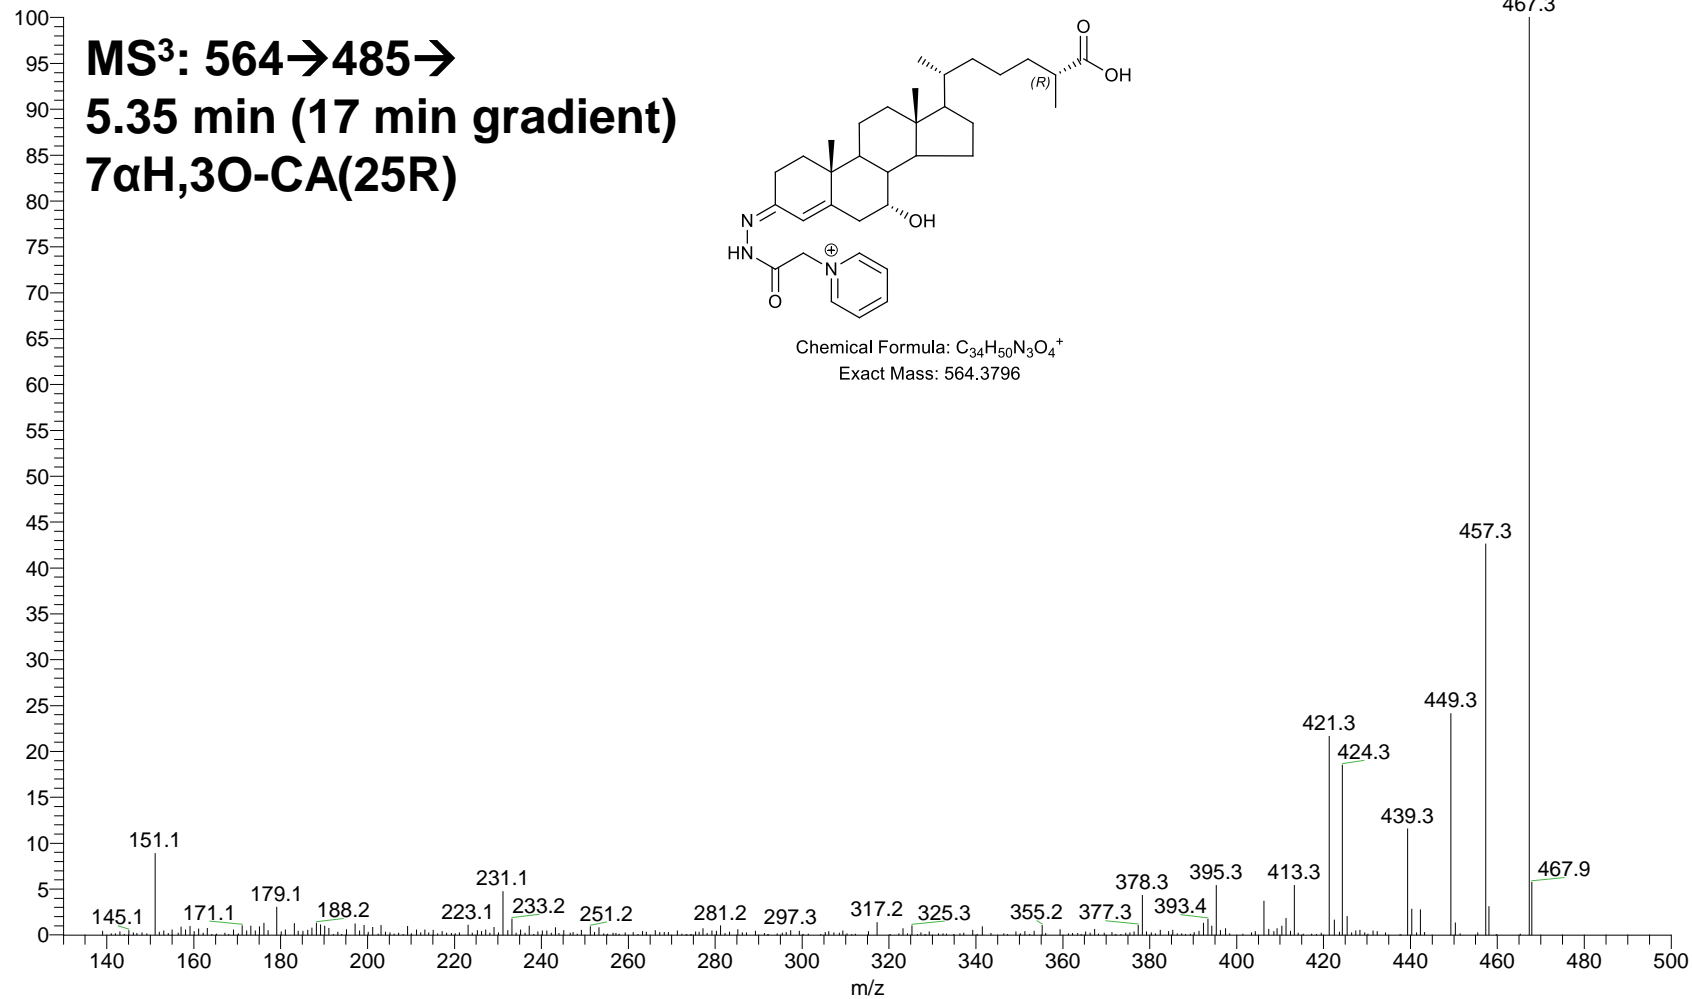

EY\_191014\_100uL-NIST-QC\_100uL-OxySpla... 10/15/19 03:47:11  
100uL NIST (2018) + 100ul OxysterolSPLASH + 10ng 22S-HCO-D7 + 20ug  
EY\_191014\_100uL-NIST-QC\_100uL-OxySplash\_rep2of5\_Fr1A=GPd5\_Fr1E  
F: ITMS + c ESI Full ms3 567.40@cid30.00 488.36@cid35.00 [130.00-580.00]

5.30 AV: 1 NL: 1.21E4

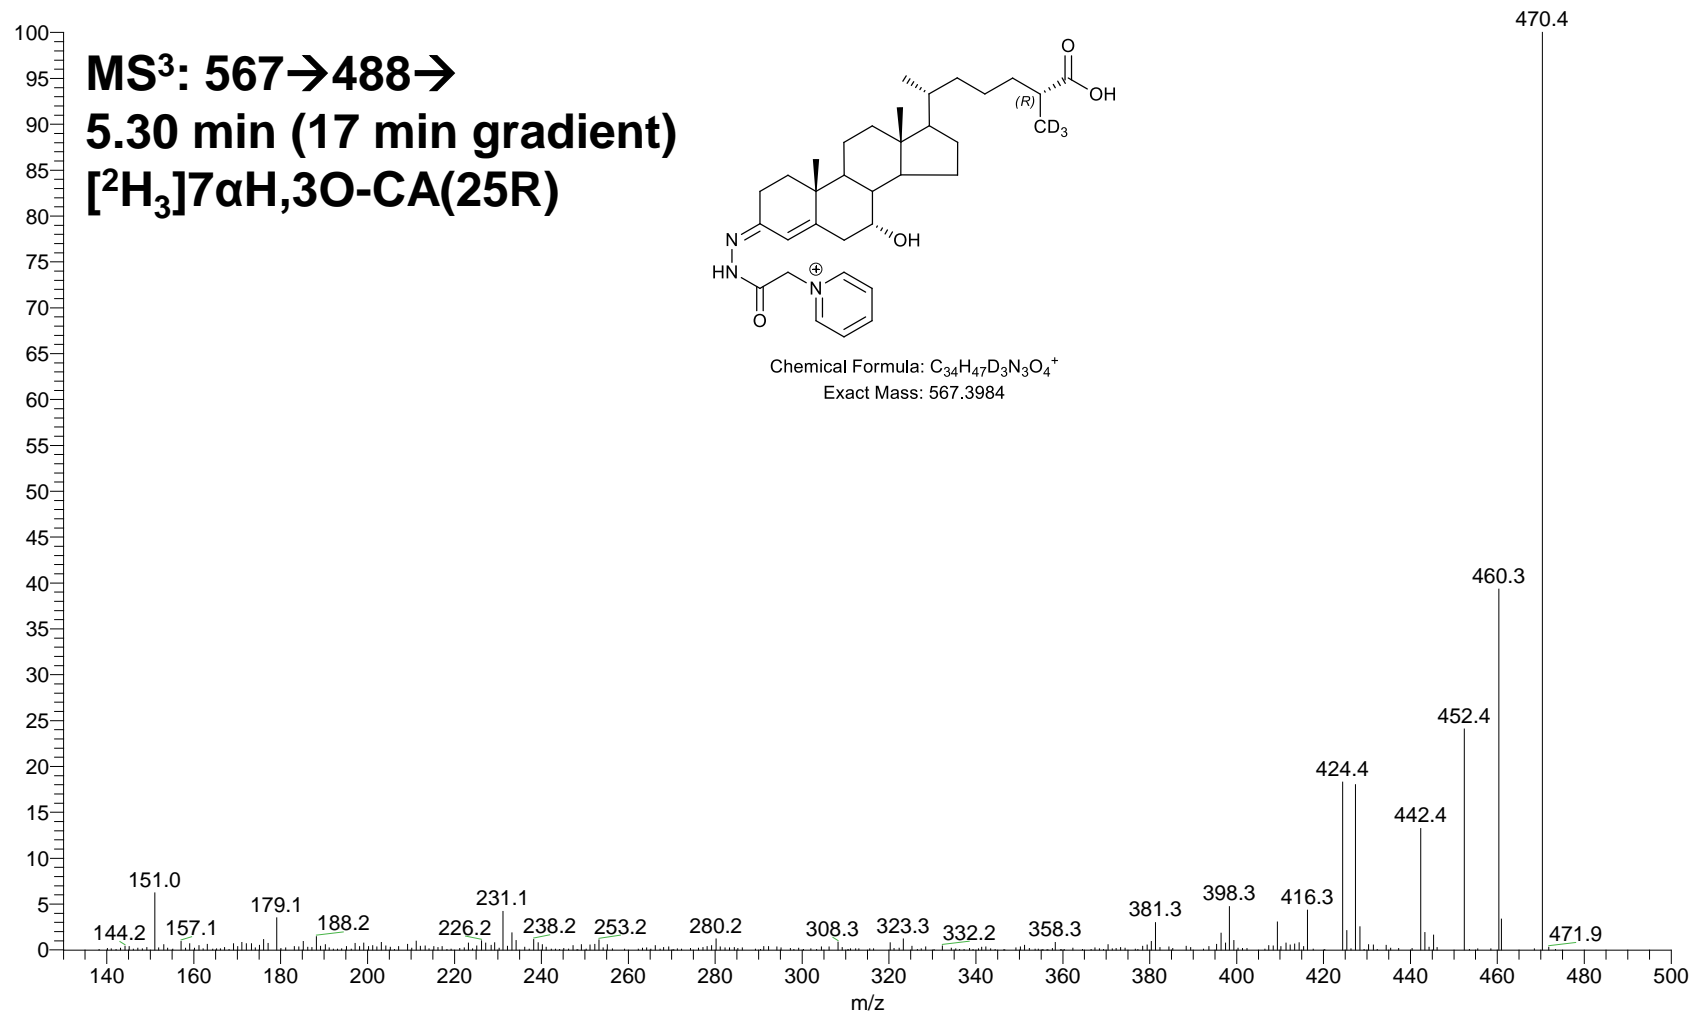

EY\_200610\_190628\_NIST-QC\_OxySplash\_+... 06/10/20 17:30:32  
 100uL NIST (2018) + 100uL splash + 20ng 22S-HCO-D7 + 20ug Chol-d  
 RT: 0.00 - 17.02

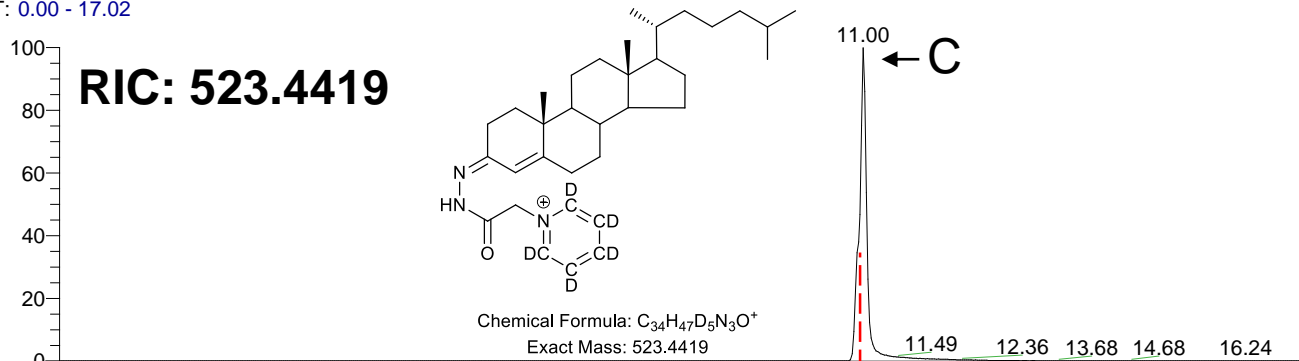

NL: 3.83E7  
 m/z= 523.4393-523.4445 F: FTMS + p  
 ESI Full ms [400.00-610.00] MS  
 EY\_200610\_190628\_NIST-  
 QC\_OxySplash\_+22S-HCO-d7\_+  
 Chol-  
 d7\_Fr3A=GPd5\_Fr3B=GPd0\_1in100\_s3]  
 \_01

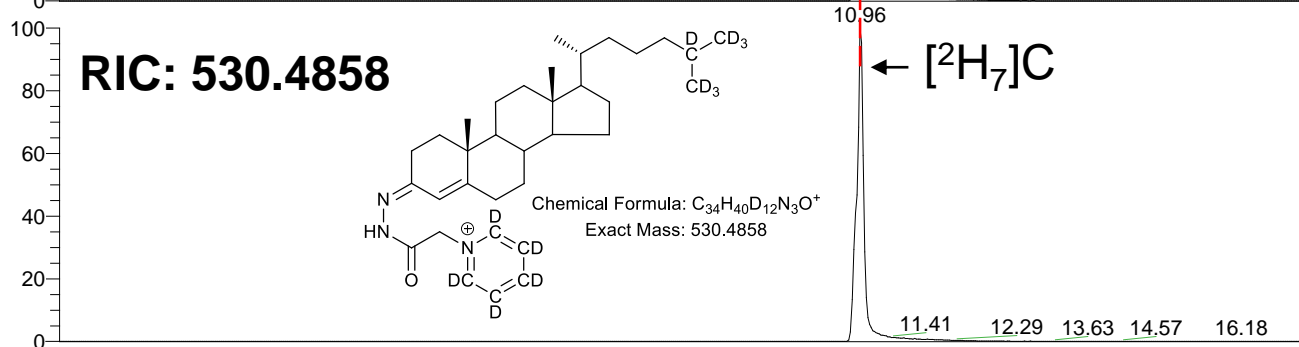

NL: 1.94E7  
 m/z= 530.4831-530.4885 F: FTMS + p  
 ESI Full ms [400.00-610.00] MS  
 EY\_200610\_190628\_NIST-  
 QC\_OxySplash\_+22S-HCO-d7\_+  
 Chol-  
 d7\_Fr3A=GPd5\_Fr3B=GPd0\_1in100\_s3]  
 \_01

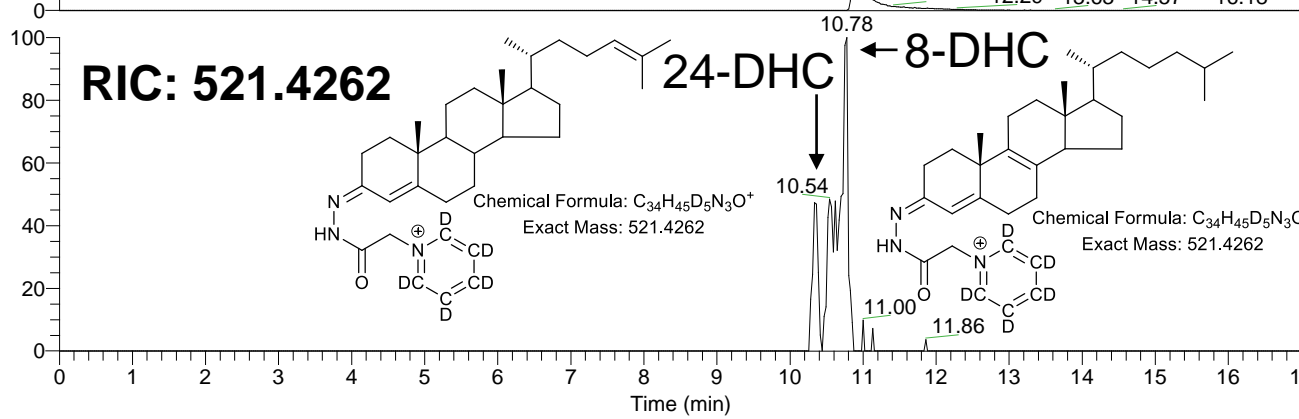

NL: 3.43E4  
 m/z= 521.4236-521.4288 F: FTMS + p  
 ESI Full ms [400.00-610.00] MS  
 EY\_200610\_190628\_NIST-  
 QC\_OxySplash\_+22S-HCO-d7\_+  
 Chol-  
 d7\_Fr3A=GPd5\_Fr3B=GPd0\_1in100\_s3]  
 \_01

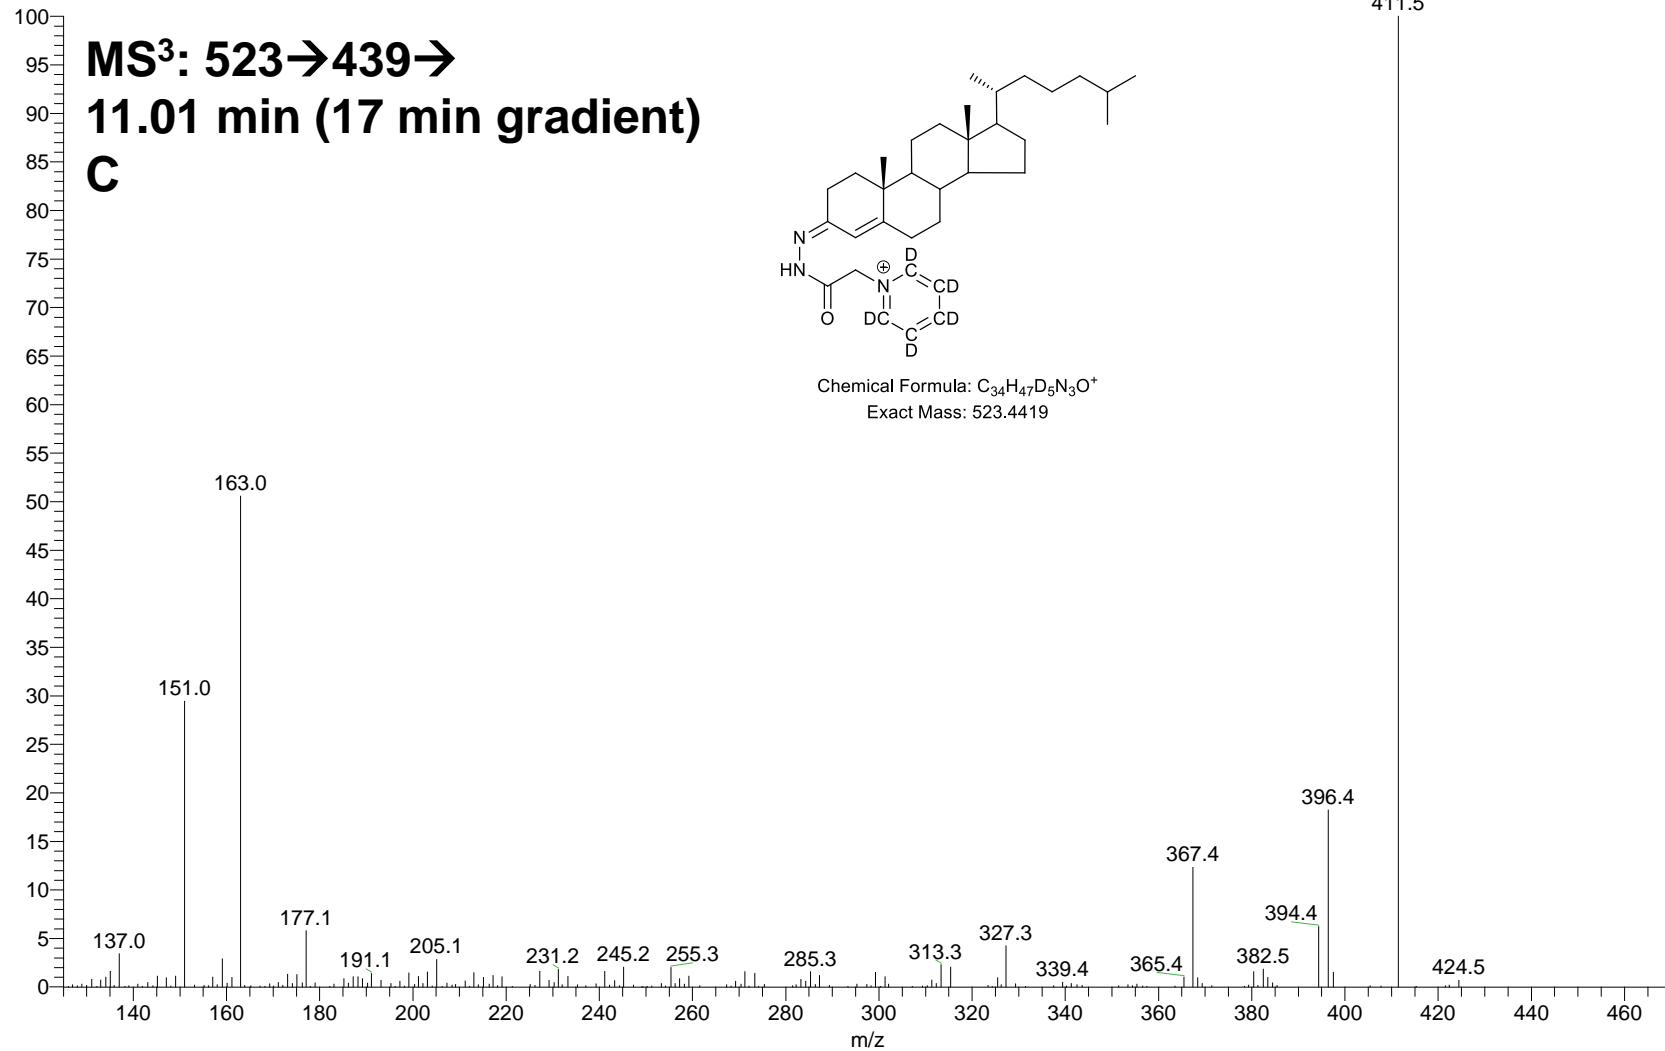

EY\_200610\_190628\_NIST-QC\_OxySplash\_+... 06/10/20 17:30:32  
100uL NIST (2018) + 100uL splash + 20ng 22S-HCO-D7 + 20ug Chol-d7  
EY\_200610\_190628\_NIST-QC\_OxySplash\_+22S-HCO-d7\_+Chol-d7\_Fr  
F: ITMS + c ESI Full ms3 530.49@cid30.00 446.41@cid35.00 [120.00-53

00\_s3j\_01 #2368 RT: 10.97 AV: 1 NL: 1.37E6

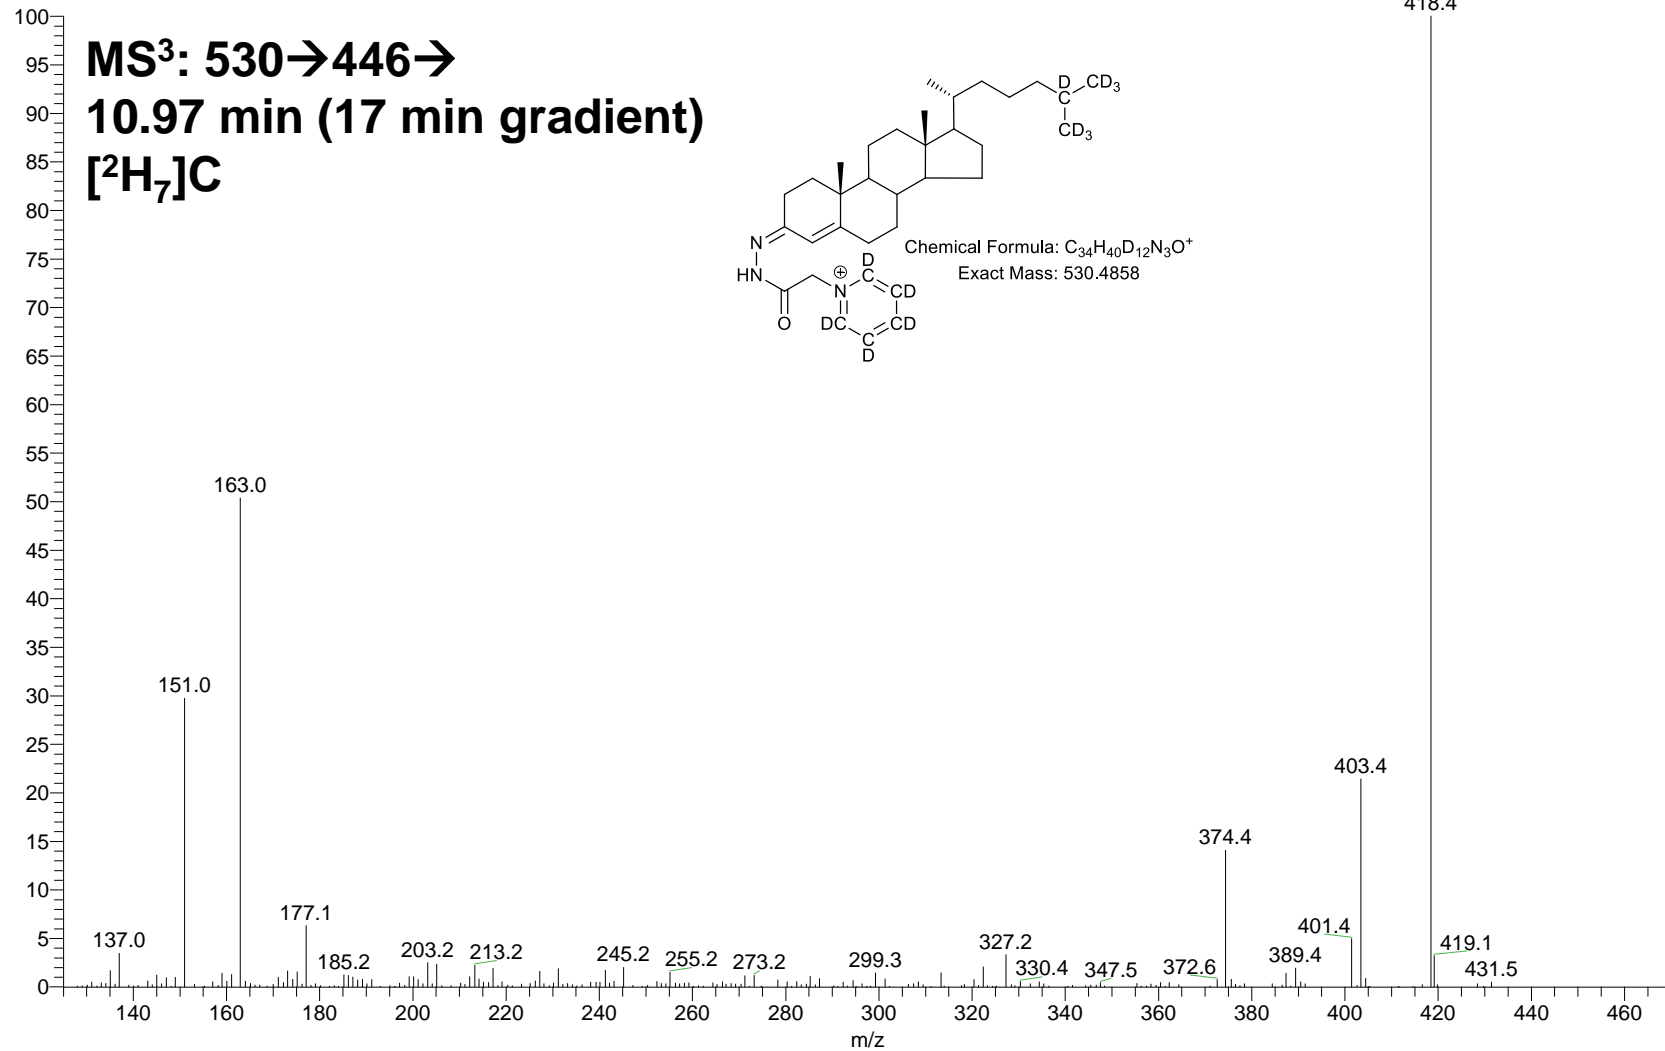



EY\_200610\_190628\_NIST-QC\_OxySplash\_+... 06/10/20 17:50:25  
100uL NIST (2018) + 100uL splash + 20ng 22S-HCO-D7 + 20ug Chol-d7 (α  
EY\_200610\_190628\_NIST-QC\_OxySplash\_+22S-HCO-d7\_+Chol-d7\_Fr3A  
F: ITMS + c ESI Full ms3 521.43@cid30.00 437.35@cid35.00 [120.00-530.00]

\_s3]\_02 #2232 RT: 10.36 AV: 1 NL: 1.14E3

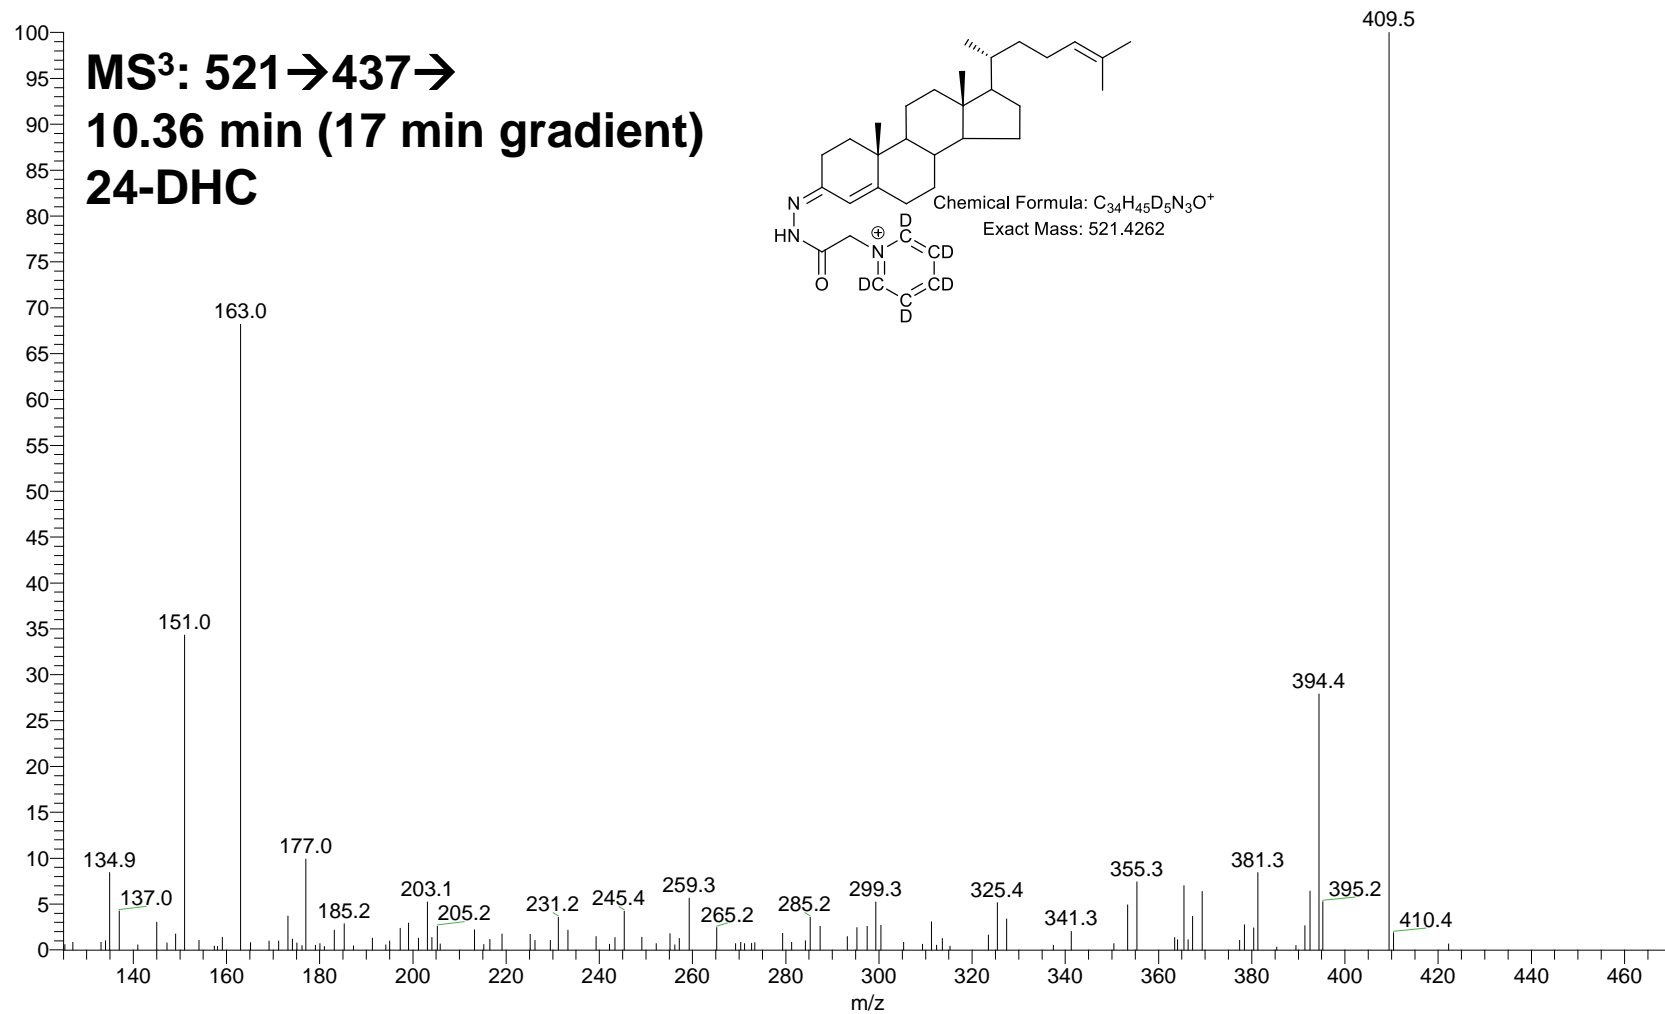

EY\_200610\_190628\_NIST-QC\_OxySplash\_+... 06/10/20 17:50:25  
100uL NIST (2018) + 100uL splash + 20ng 22S-HCO-D7 + 20ug Chol-d7 (α  
EY\_200610\_190628\_NIST-QC\_OxySplash\_+22S-HCO-d7\_+Chol-d7\_Fr3A  
F: ITMS + c ESI Full ms3 521.43@cid30.00 437.35@cid35.00 [120.00-530.00]

\_s3]\_02 #2328 RT: 10.76 AV: 1 NL: 2.80E3

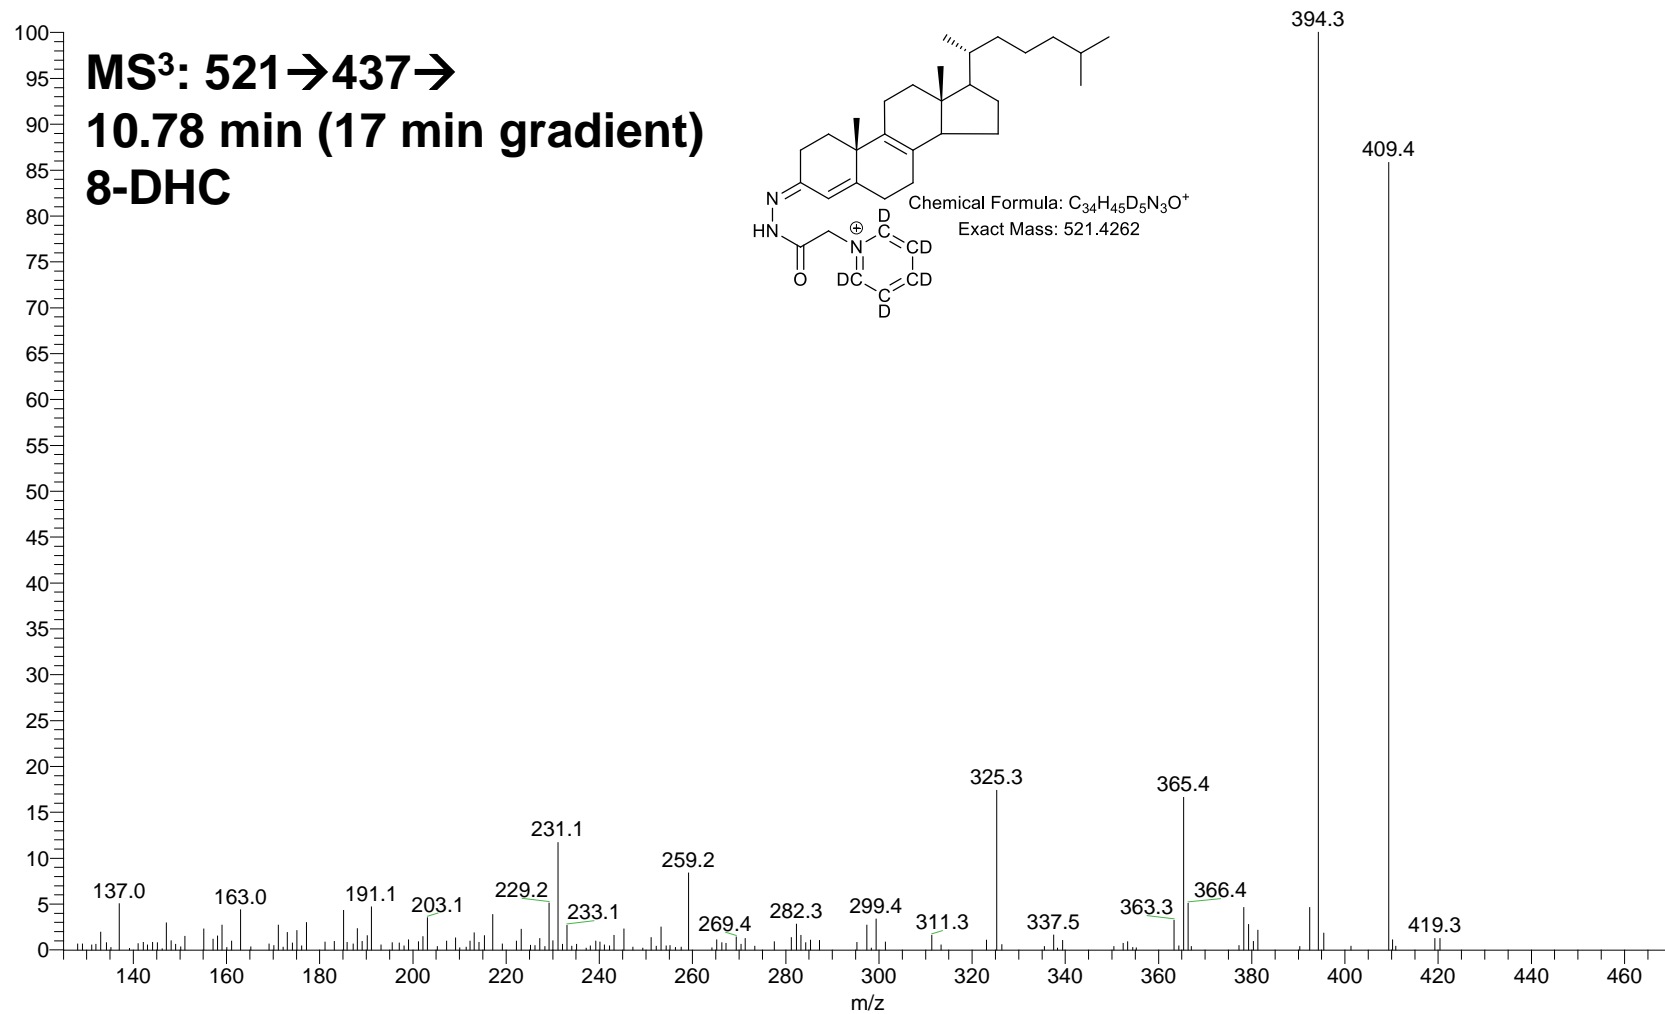

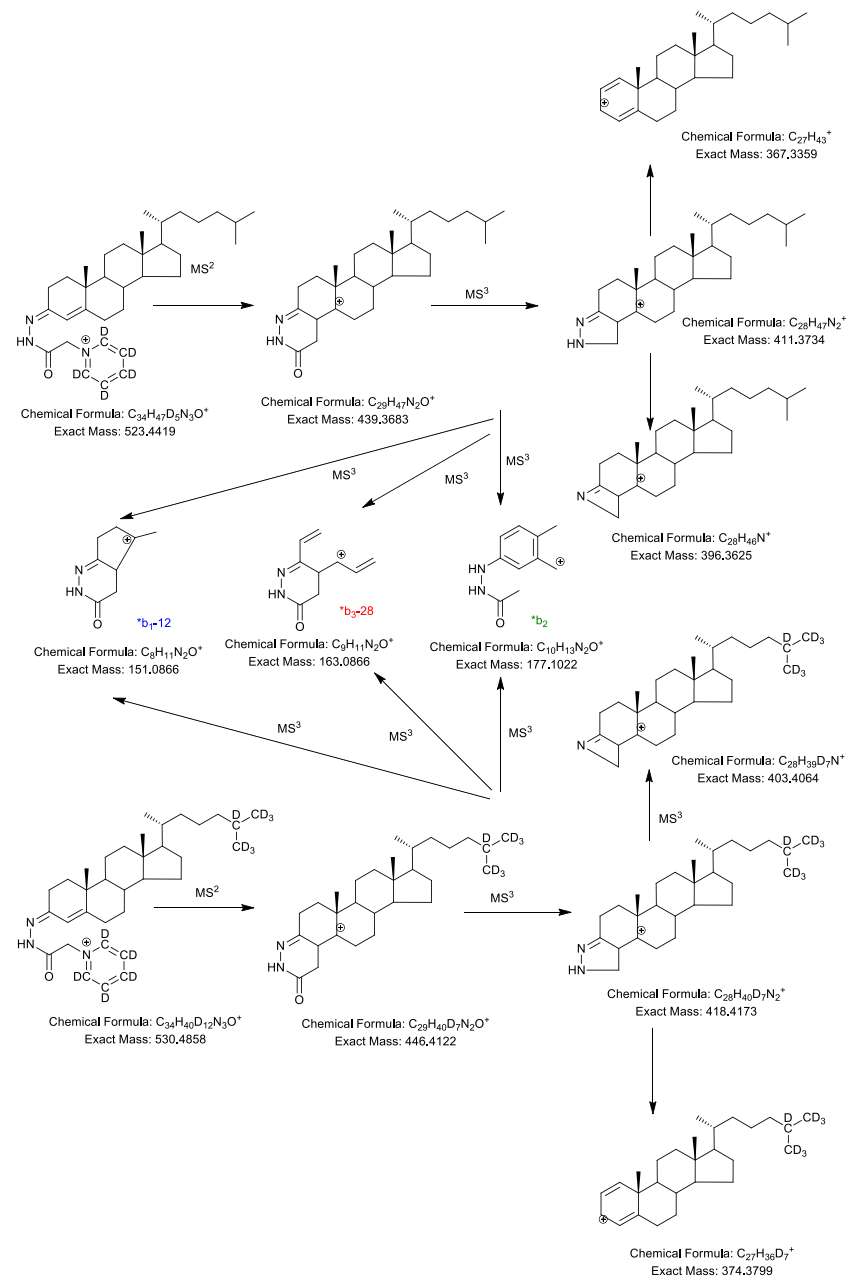

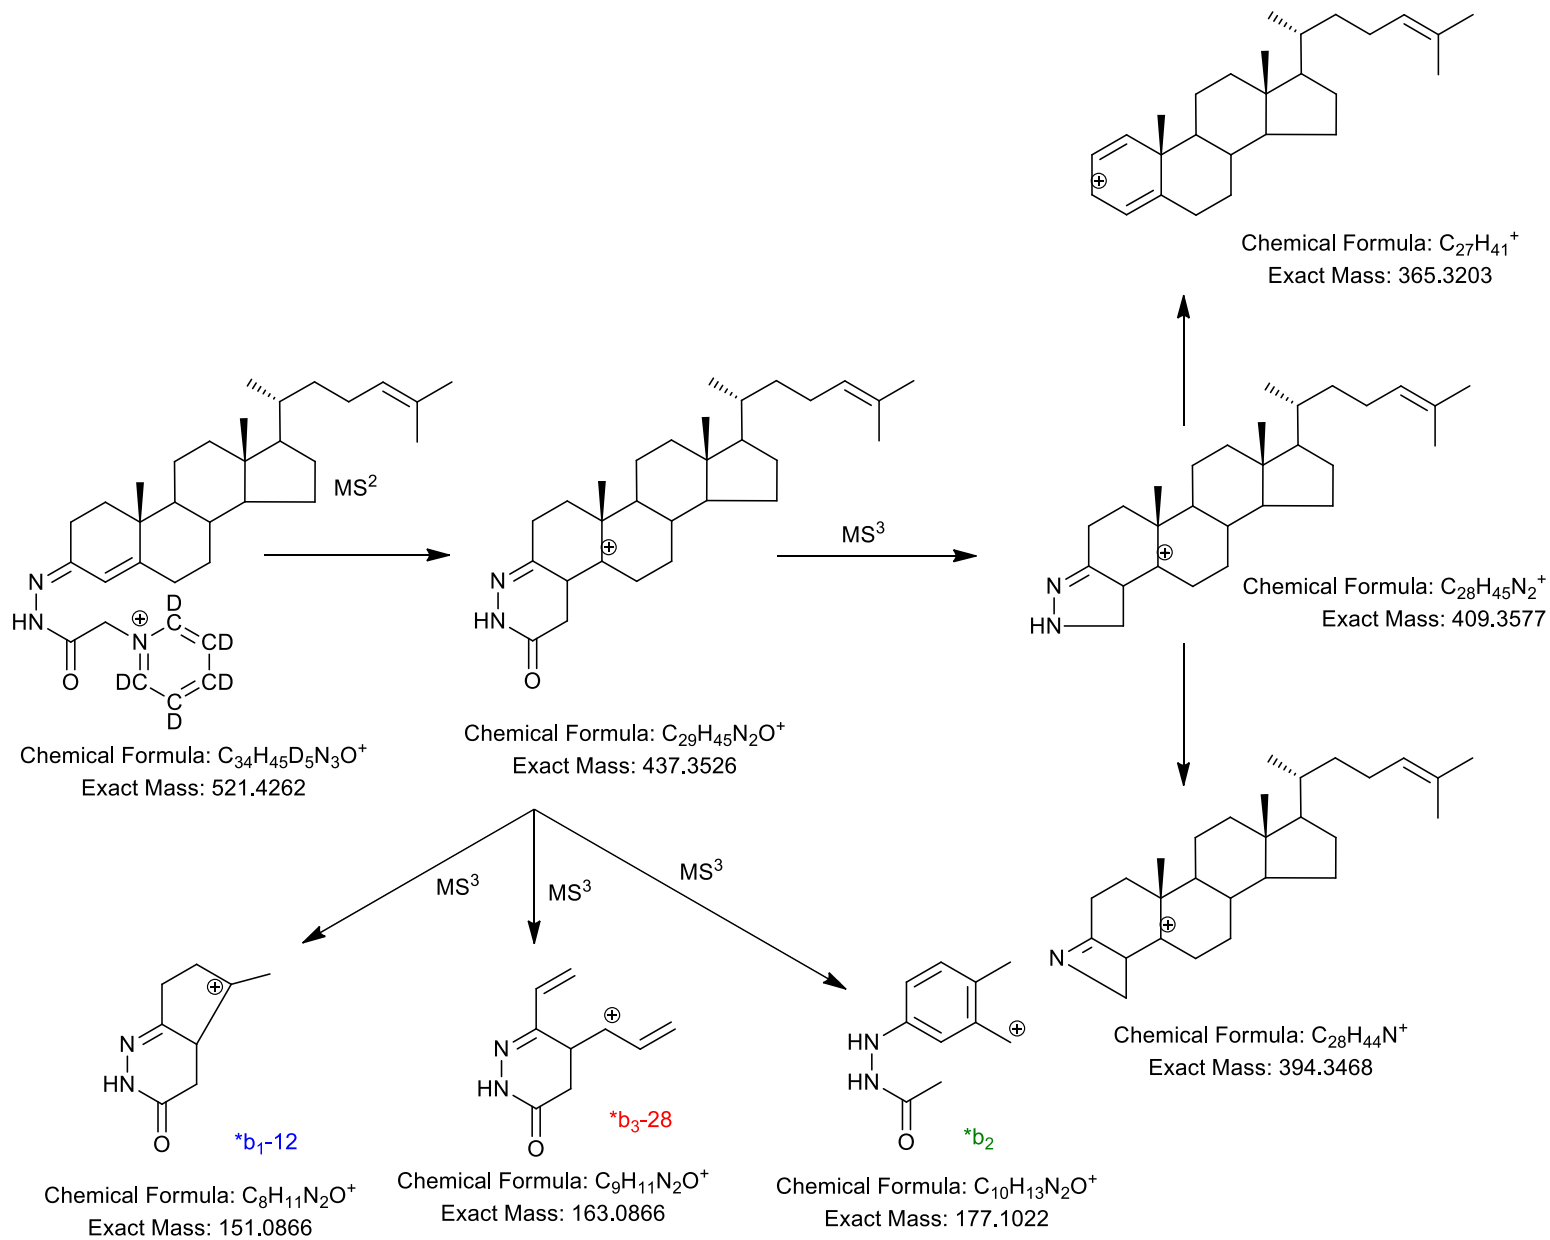

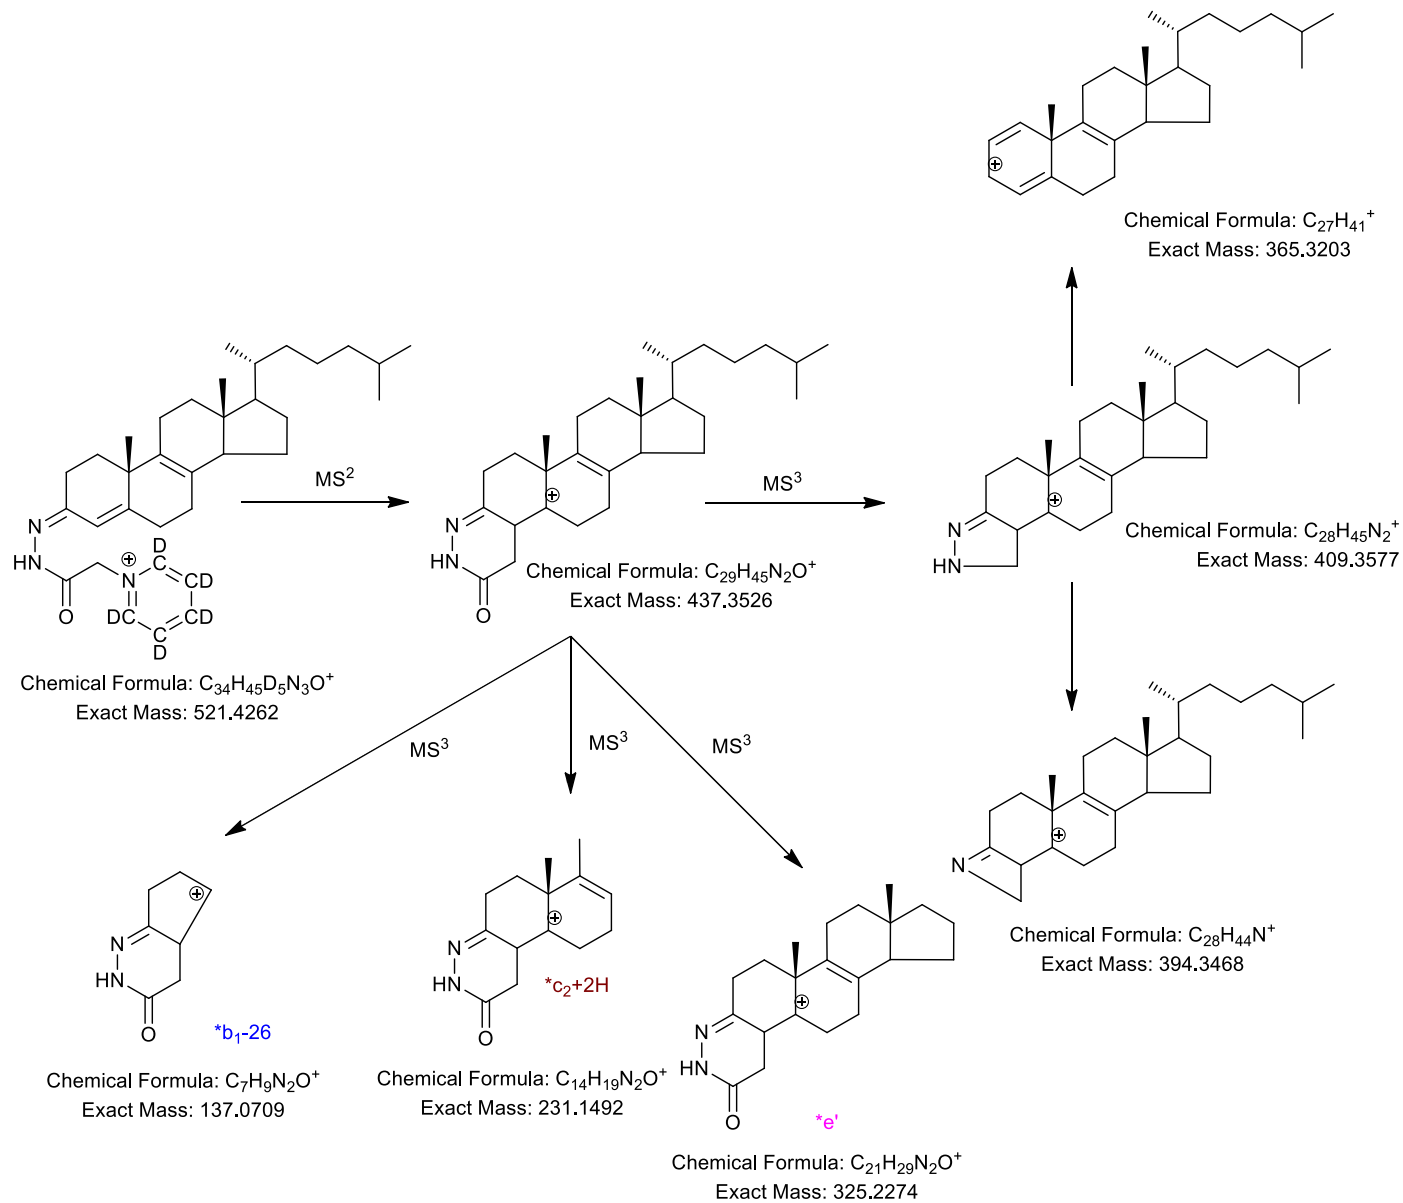

# S10A

EY\_191014\_100uL-NIST-QC\_with\_2017-Pro...  
100uL NIST (2018) + 2017-Protocol-iSTDs (¿

10/16/19 13:46:25  
1g 22S-HCO-D7 + 20ug Chol-D7(certified)

RT: 0.00 - 17.01

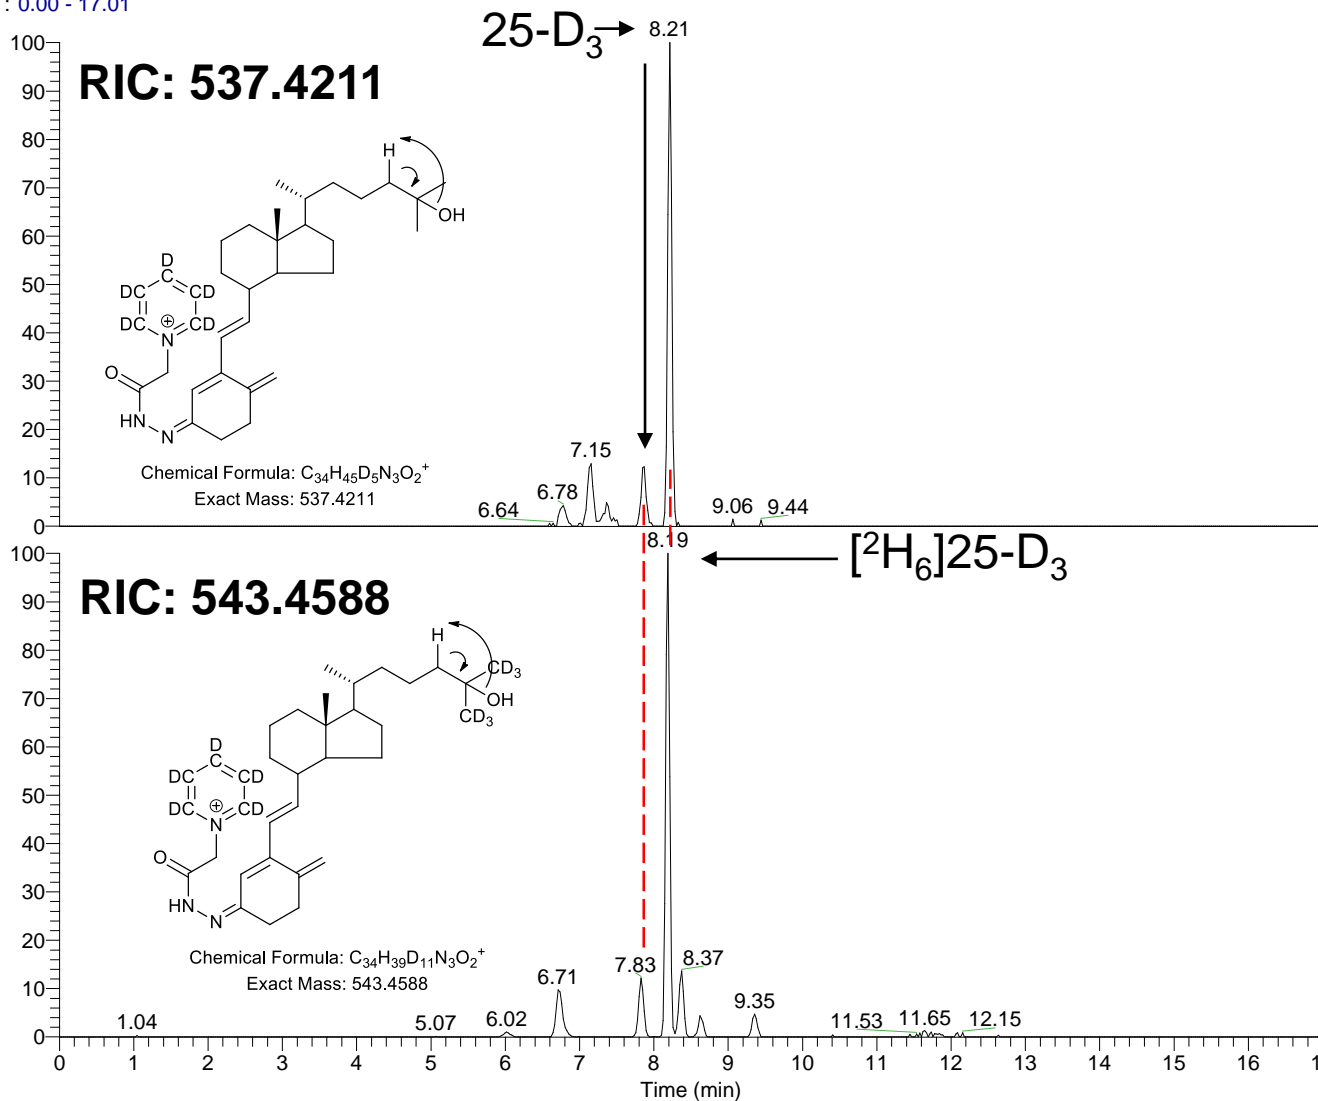

NL: 7.13E4  
m/z= 537.4185-537.4239 F: FTMS + p  
ESI Full ms [400.00-610.00] MS  
EY\_191014\_100uL-NIST-  
QC\_with\_2017-Protocol-  
iSTDs\_rep2of5\_Fr1A=GPd5\_Fr1B=GP  
d0\_s7\_09

NL: 3.41E5  
m/z= 543.4561-543.4615 F: FTMS + p  
ESI Full ms [400.00-610.00] MS  
EY\_191014\_100uL-NIST-  
QC\_with\_2017-Protocol-  
iSTDs\_rep2of5\_Fr1A=GPd5\_Fr1B=GP  
d0\_s7\_09

RT: 0.00 - 17.01

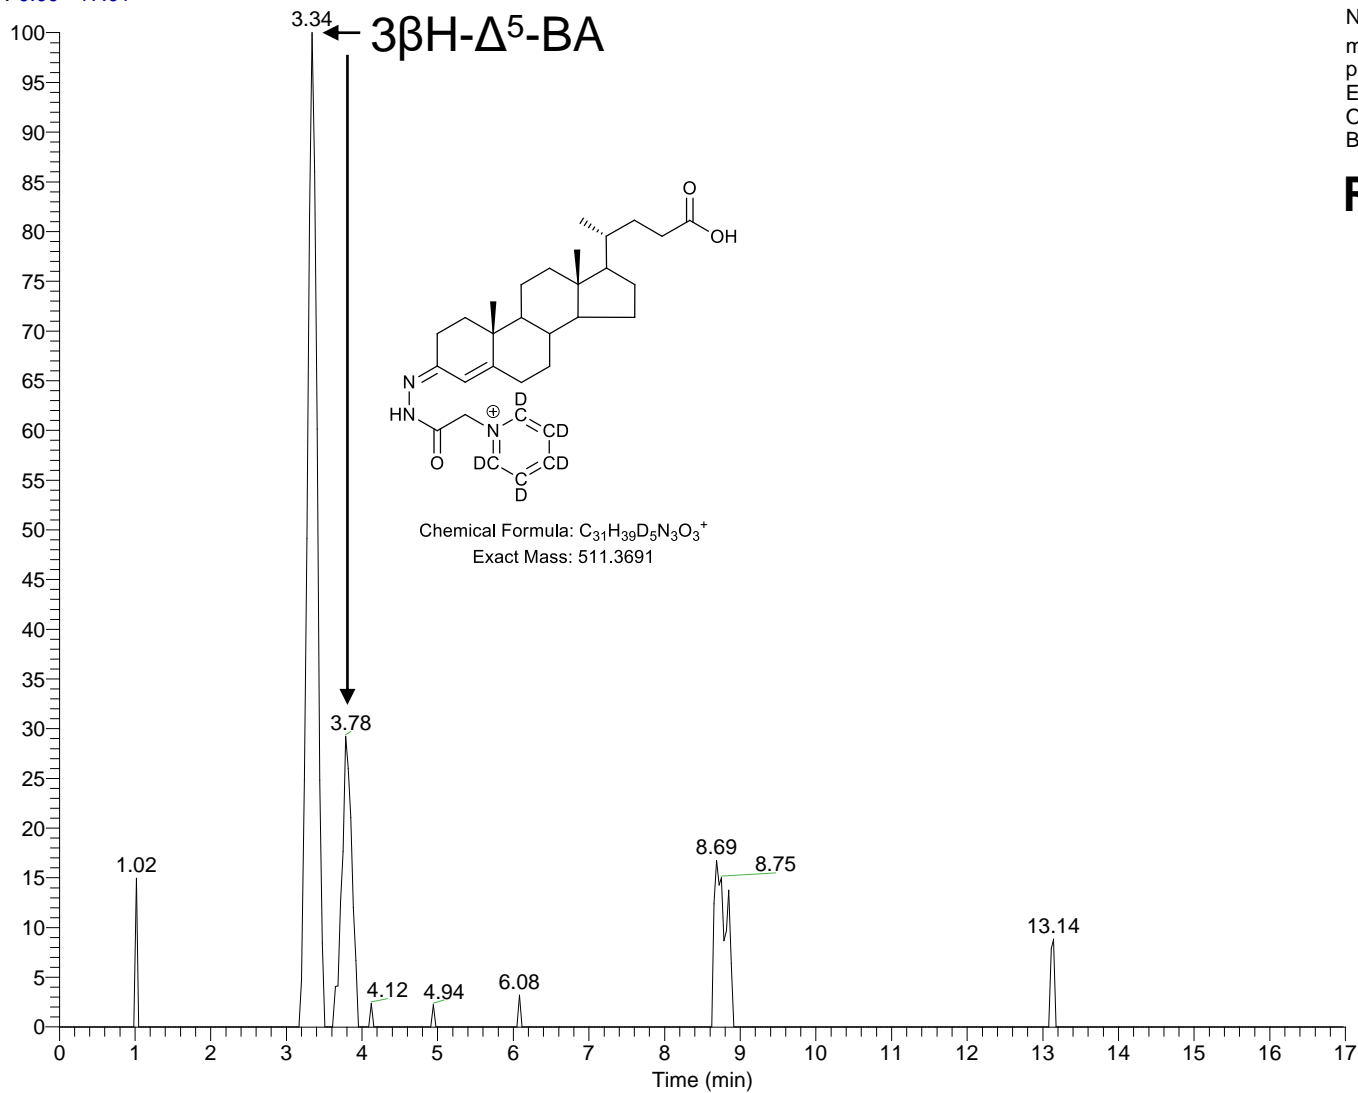

NL: 1.50E4  
m/z= 511.3665-511.3717 F: FTMS +  
p ESI Full ms [400.00-610.00] MS  
EY\_191014\_100uL-NIST-QC\_100uL-  
OxySplash\_rep2of5\_Fr1A=GPd5\_Fr1  
B=GPd0\_s2\_11

## RIC: 511.3691

RT: 0.00 - 17.00

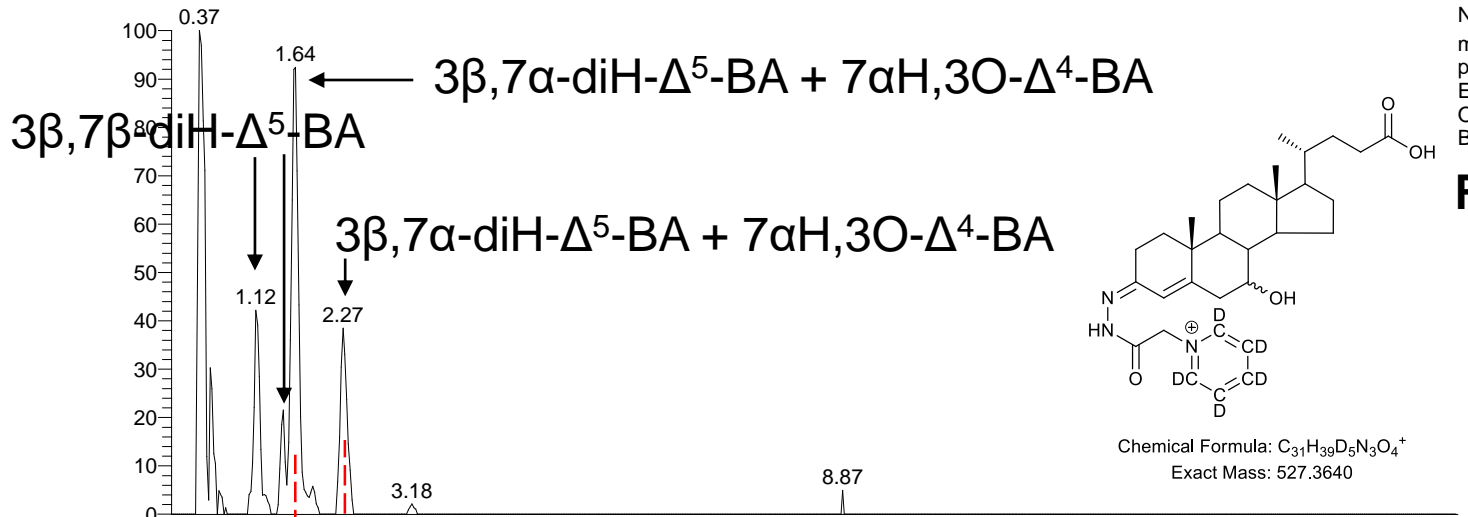

NL: 4.95E4  
m/z= 527.3614-527.3666 F: FTMS +  
p ESI Full ms [400.00-610.00] MS  
EY\_191014\_100uL-NIST-QC\_100uL-  
OxySplash\_rep2of5\_Fr1A=GPd5\_Fr1  
B=GPd0\_s2\_06

**RIC: 527.3640**

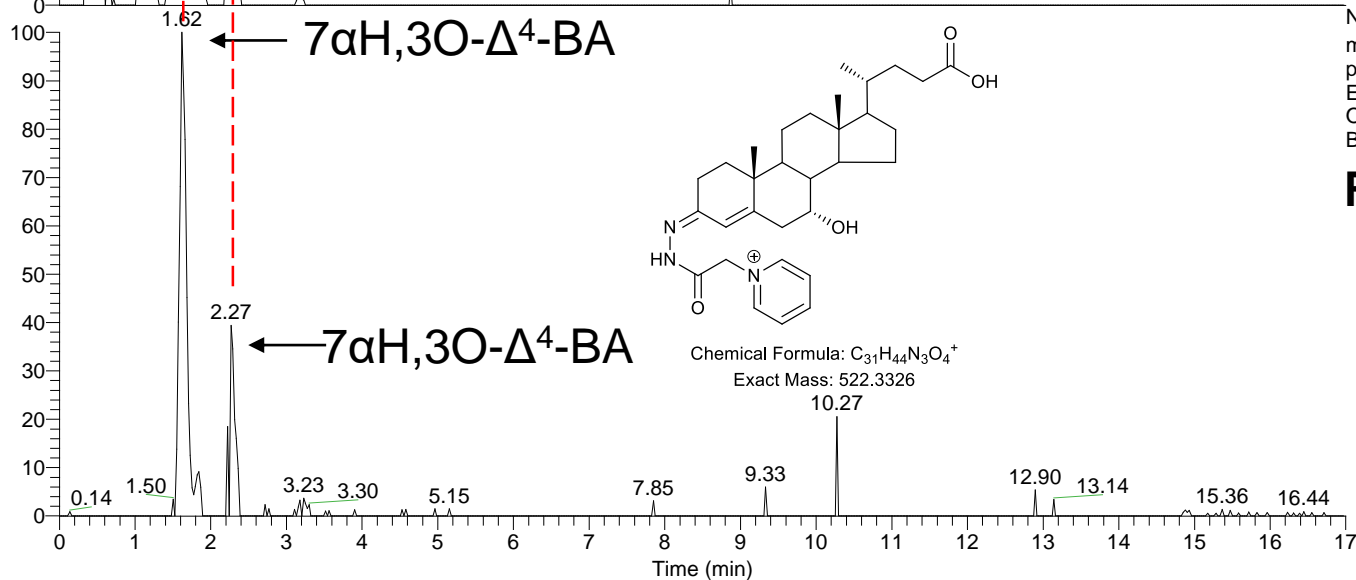

NL: 2.67E4  
m/z= 522.3300-522.3352 F: FTMS +  
p ESI Full ms [400.00-610.00] MS  
EY\_191014\_100uL-NIST-QC\_100uL-  
OxySplash\_rep2of5\_Fr1A=GPd5\_Fr1  
B=GPd0\_s2\_06

**RIC: 522.3326**



RT: 0.00 - 17.00

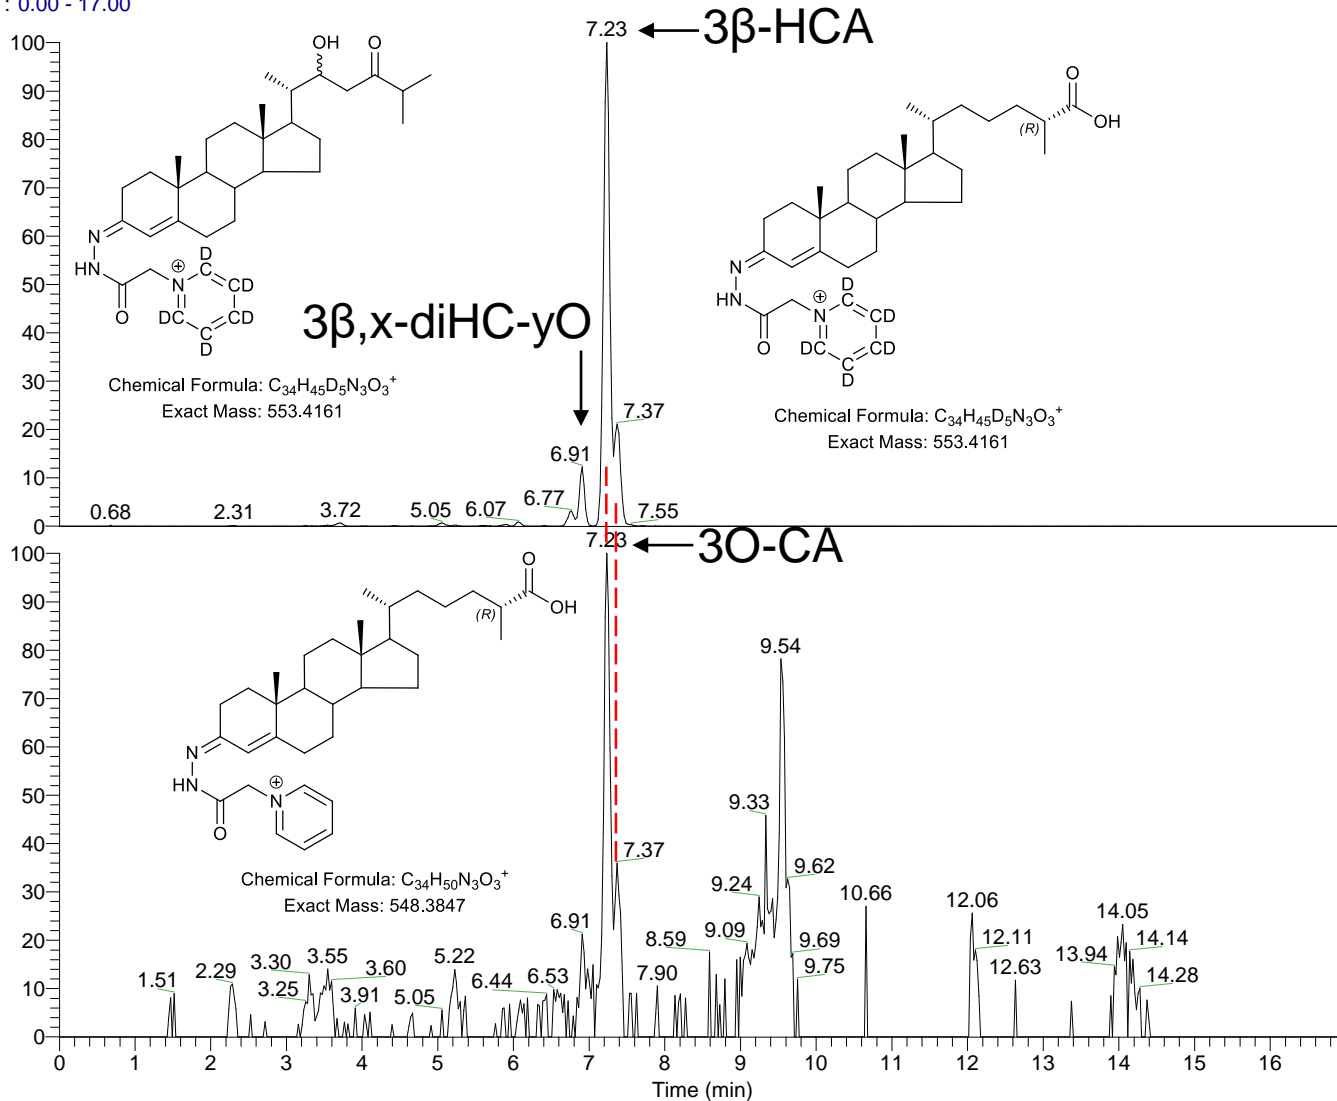

NL: 8.56E5  
m/z= 553.4133-553.4189 F: FTMS +  
p ESI Full ms [400.00-610.00] MS  
EY\_191014\_100uL-NIST-QC\_100uL-  
OxySplash\_rep2of5\_Fr1A=GPd5\_Fr1  
B=GPd0\_s2\_07

**RIC: 553.4160**

NL: 1.39E4  
m/z= 548.3820-548.3874 F: FTMS +  
p ESI Full ms [400.00-610.00] MS  
EY\_191014\_100uL-NIST-QC\_100uL-  
OxySplash\_rep2of5\_Fr1A=GPd5\_Fr1  
B=GPd0\_s2\_07

**RIC: 548.3847**

7α,x-diH,3O-CA ← 3β,7α,12α-triHCA + 7α,12α-diH,3O-CA

3β,7α,24-triHCA +  
7α,24-diH,3O-CA

3β,7α,25-triHCA +  
7α,25-diH,3O-CA

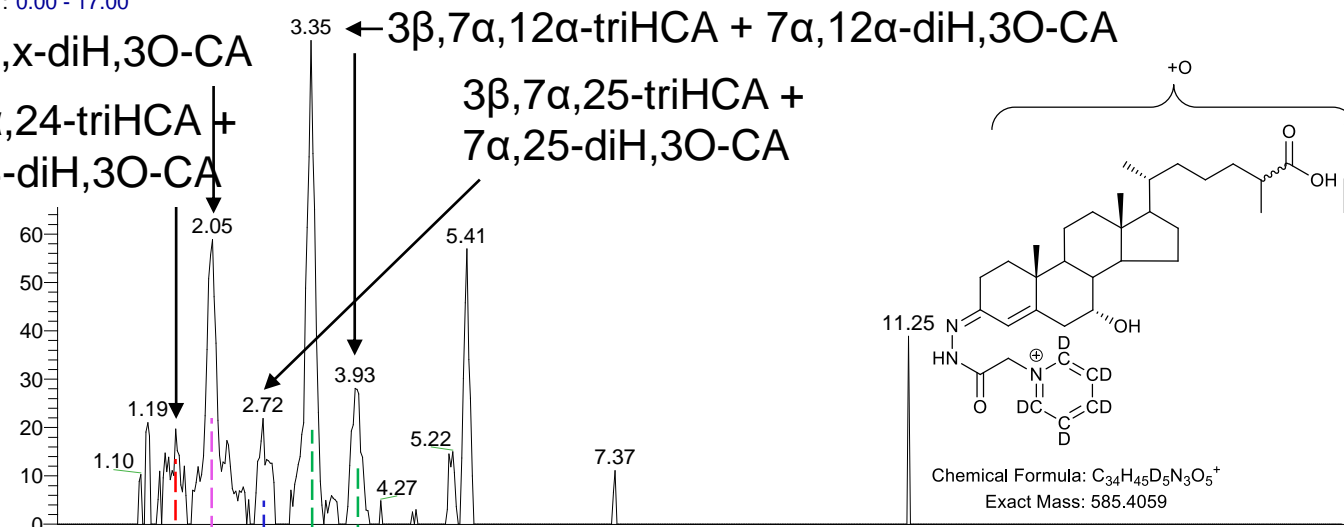

NL: 1.24E4  
m/z= 585.4030-585.4088 F: FTMS +  
p ESI Full ms [400.00-610.00] MS  
EY\_191014\_100uL-NIST-QC\_100uL-  
OxySplash\_rep2of5\_Fr1A=GPd5\_Fr1  
B=GPd0\_s2\_07

**RIC: 585.4059**

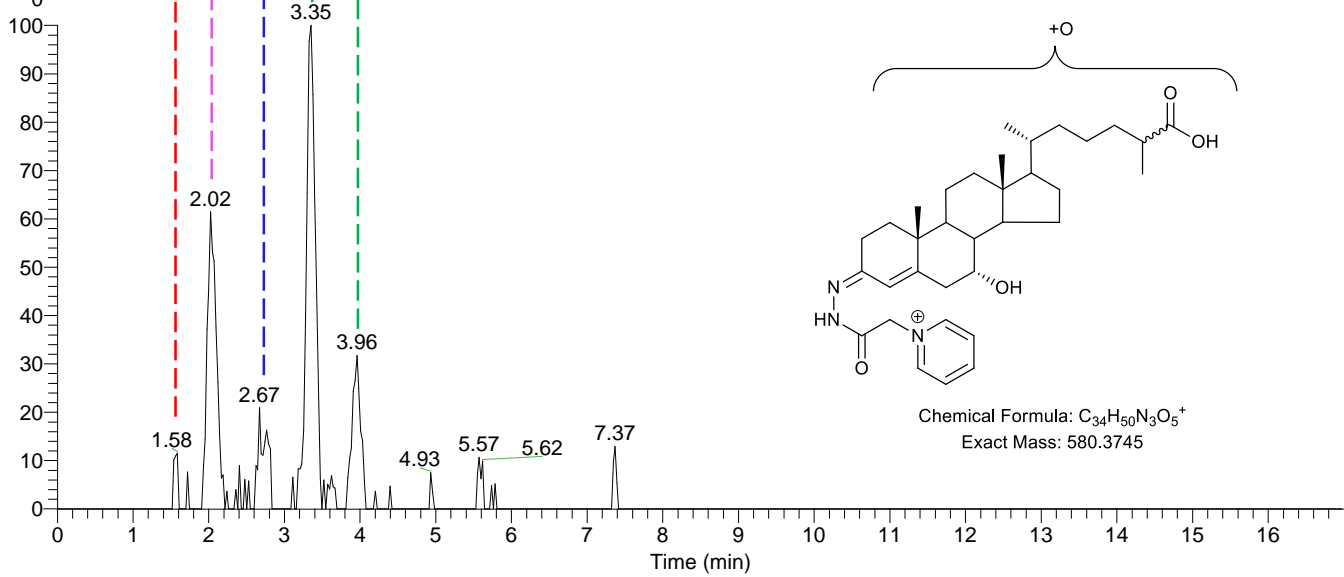

NL: 1.08E4  
m/z= 580.3716-580.3774 F: FTMS +  
p ESI Full ms [400.00-610.00] MS  
EY\_191014\_100uL-NIST-QC\_100uL-  
OxySplash\_rep2of5\_Fr1A=GPd5\_Fr1  
B=GPd0\_s2\_07

**RIC: 580.3739**

# S10F

EY\_191014\_100uL-NIST-QC\_100uL-OxySpla...  
100uL NIST (2018) + 100ul OxysterolSPLAS  
RT: 0.00 - 17.00

10/15/19 04:28:42  
µg Chol-D7(certified)

NL: 1.24E4

m/z= 585.4030-585.4088 F: FTMS + p ESI  
Full ms [400.00-610.00] MS  
EY\_191014\_100uL-NIST-QC\_100uL-  
OxySplash\_rep2of5\_Fr1A=GPd5\_Fr1B=GPd0  
\_s2\_07

## RIC: 585.4059

### 3β,7α,24-triHCA + 7α,24-diH,3O-CA

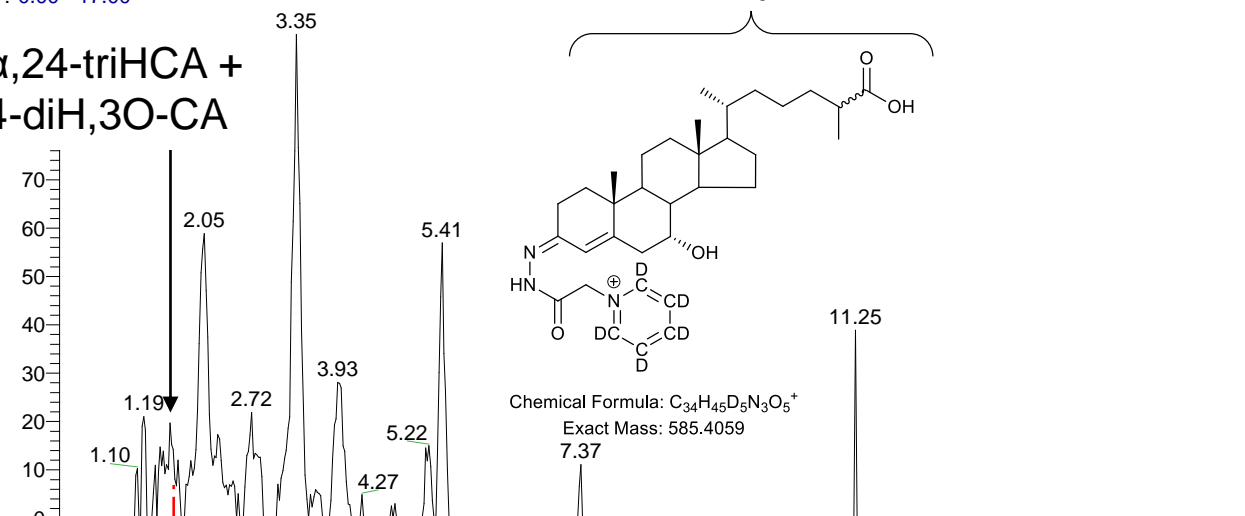

NL: 1.58E2

m/z= 427.0000-427.7000 F: ITMS + c ESI Full  
ms3 585.41@cid30.00 501.33@cid35.00  
[135.00-590.00] MS  
EY\_191014\_100uL-NIST-QC\_100uL-  
OxySplash\_rep2of5\_Fr1A=GPd5\_Fr1B=GPd0  
\_s2\_07

## MRM: 585→501→427

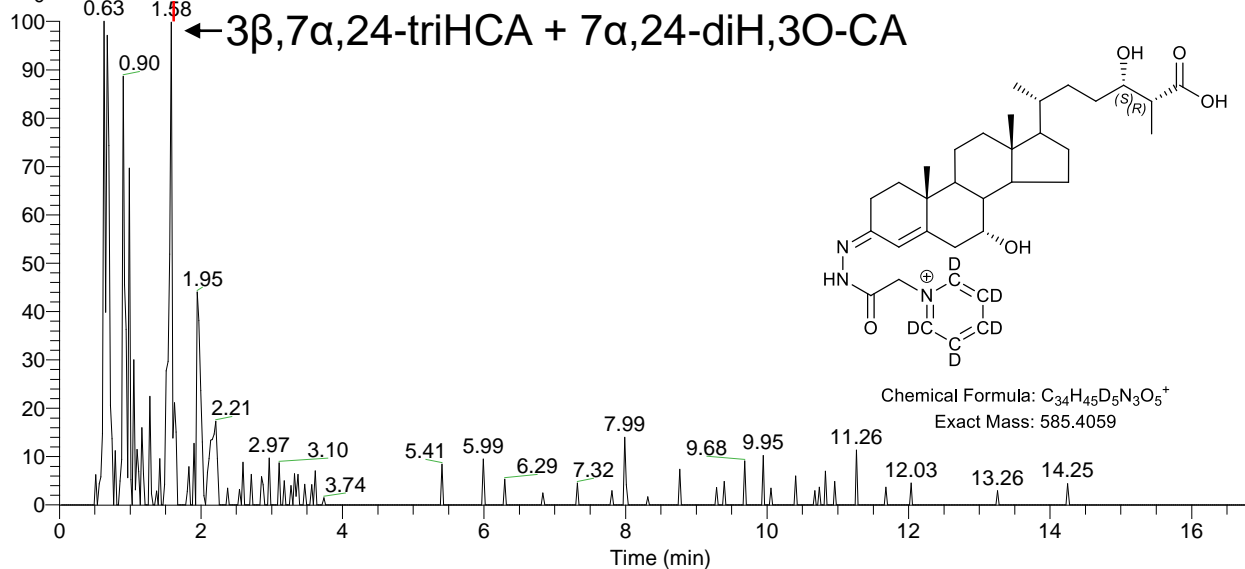

EY\_191014\_100uL-NIST-QC\_100uL-OxySpla...  
100uL NIST (2018) + 100ul OxysterolSPLAS  
RT: 0.00 - 17.00

10/15/19 04:28:42  
µg Chol-D7(certified)

## 3β,7α,25-triHCA + 7α,25-diH,3O-CA

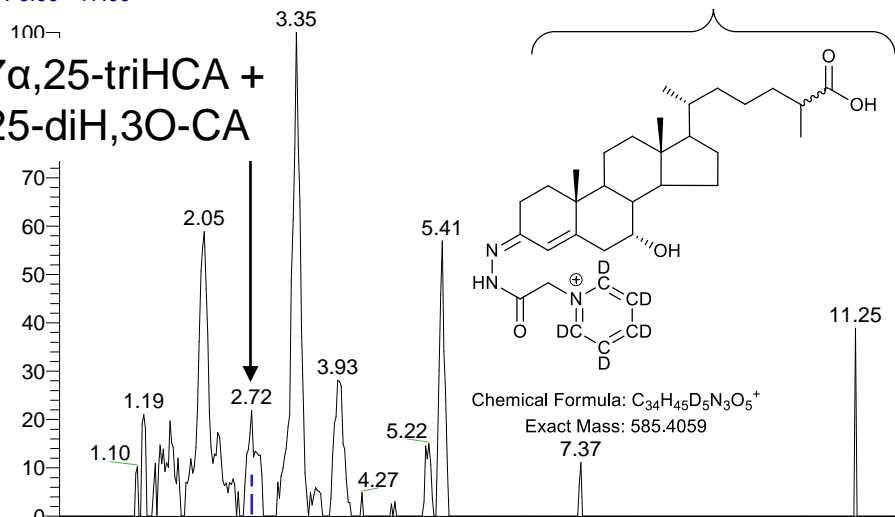

NL: 1.24E4

m/z= 585.4030-585.4088 F: FTMS + p ESI  
Full ms [400.00-610.00] MS  
EY\_191014\_100uL-NIST-QC\_100uL-  
OxySplash\_rep2of5\_Fr1A=GPd5\_Fr1B=GPd0  
\_s2\_07

### RIC: 585.4059

## ← 3β,7α,25-triHCA + 7α,25-diH,3O-CA

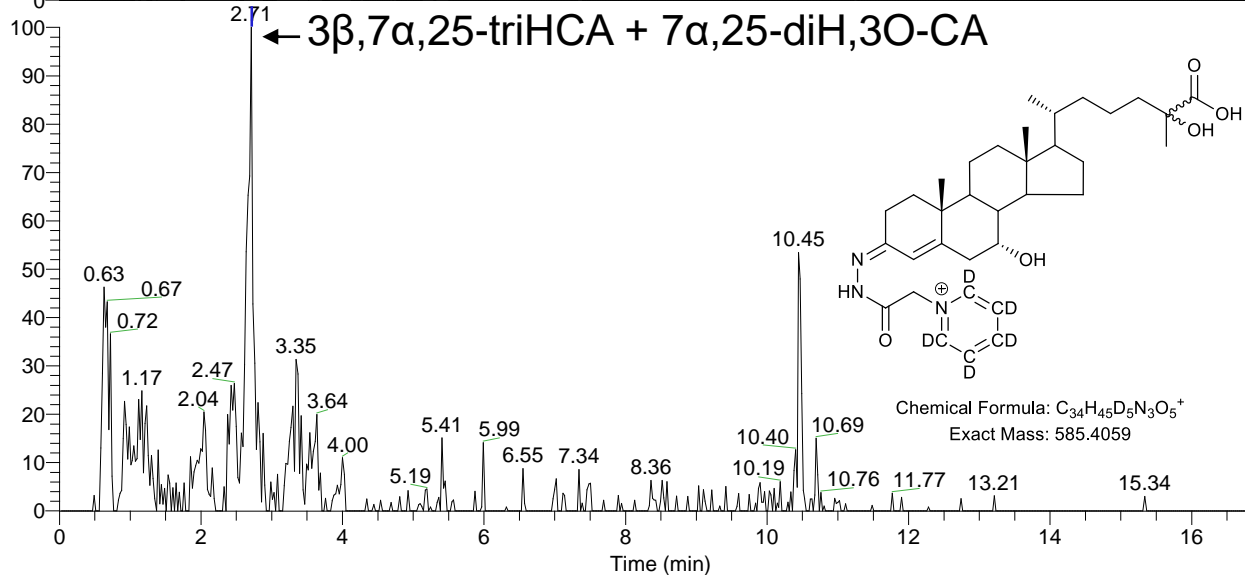

NL: 3.66E2

m/z= 455.0000-455.7000 F: ITMS + c ESI Full  
ms3 585.41@cid30.00 501.33@cid35.00  
[135.00-590.00] MS  
EY\_191014\_100uL-NIST-QC\_100uL-  
OxySplash\_rep2of5\_Fr1A=GPd5\_Fr1B=GPd0  
\_s2\_07

### MRM: 585→501→455

RT: 0.00 - 17.00

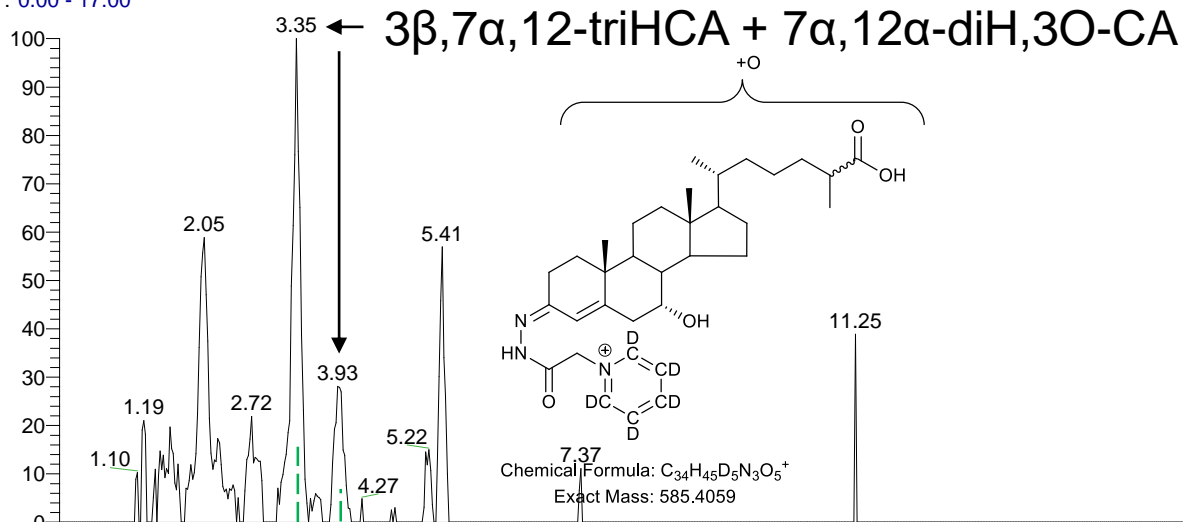

NL: 1.24E4

m/z= 585.4030-585.4088 F: FTMS + p ESI  
Full ms [400.00-610.00] MS  
EY\_191014\_100uL-NIST-QC\_100uL-  
OxySplash\_rep2of5\_Fr1A=GPd5\_Fr1B=GPd0  
\_s2\_07

**RIC: 585.4059**

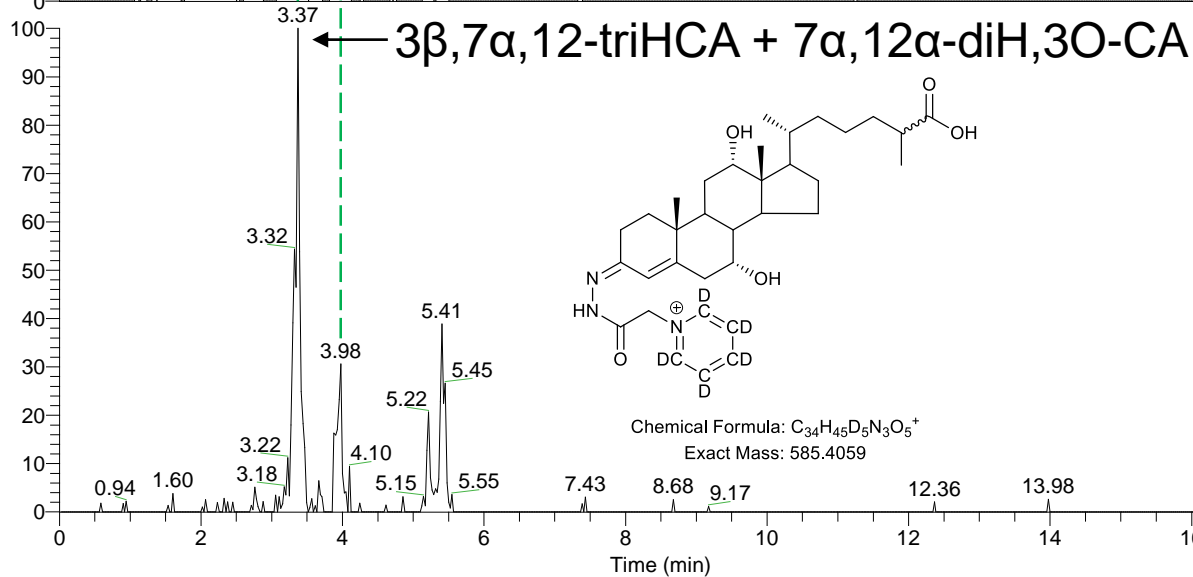

NL: 3.75E2

m/z= 422.0000-422.7000 F: ITMS + c ESI Full  
ms3 585.41@cid30.00 501.33@cid35.00  
[135.00-590.00] MS  
EY\_191014\_100uL-NIST-QC\_100uL-  
OxySplash\_rep2of5\_Fr1A=GPd5\_Fr1B=GPd0  
\_s2\_07

**MRM: 585→501→422**

EY\_191014\_100uL-NIST-QC\_100uL-OxySpla... 10/15/19 05:10:14  
100uL NIST (2018) + 100ul OxysterolSPLASH + 10ng 22S-HCO-D7 + 20ug  
EY\_191014\_100uL-NIST-QC\_100uL-OxySplash\_rep2of5\_Fr1A=GPd5\_Fr1E  
F: ITMS + c ESI Full ms3 537.42@cid30.00 435.34@cid35.00 [115.00-545.00]

8.19 AV: 1 NL: 4.20E3

**MS<sup>3</sup>: 537→435→  
8.19 min (17 min gradient)  
25-D<sub>3</sub>**

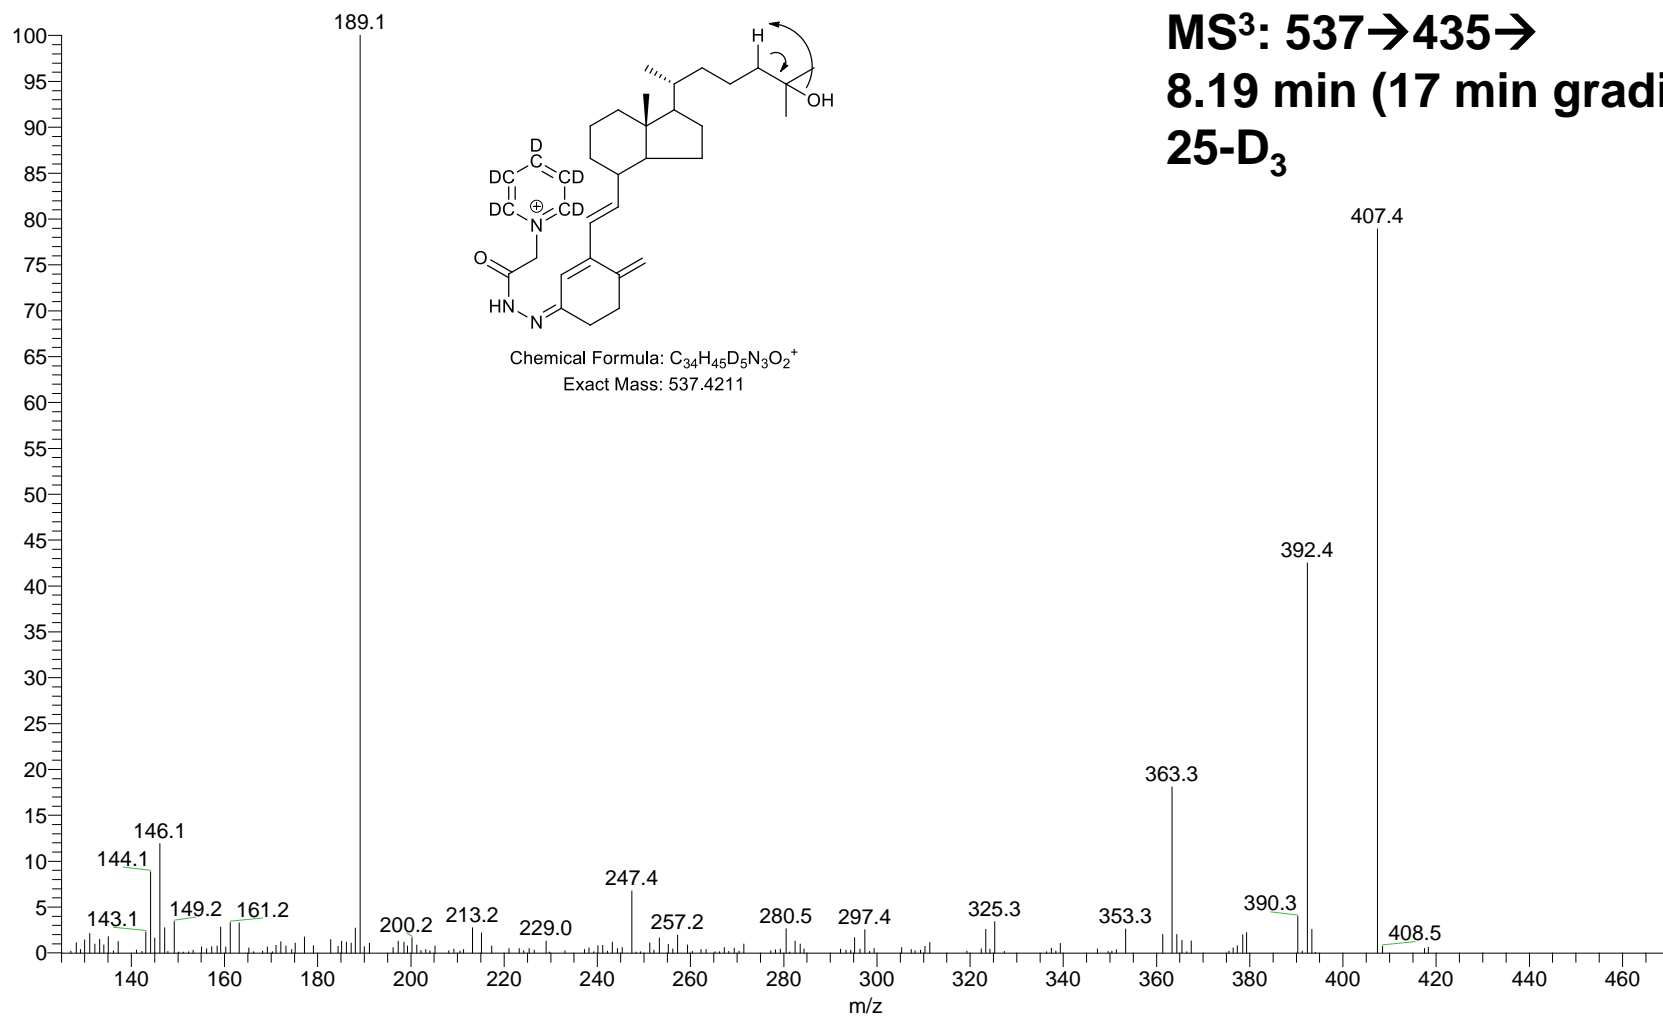

EY\_191014\_100uL-NIST-QC\_with\_2017-Pro... 10/16/19 13:46:25  
100uL NIST (2018) + 2017-Protocol-iSTDs (20ng 24RS-HC-d6-cert) + 10ng  
EY\_191014\_100uL-NIST-QC\_with\_2017-Protocol-iSTDs\_rep2of5\_Fr1A=GF  
F: ITMS + c ESI Full ms3 543.46@cid30.00 441.37@cid35.00 [120.00-550.00]

7(certified)  
50 RT: 8.19 AV: 1 NL: 1.28E4

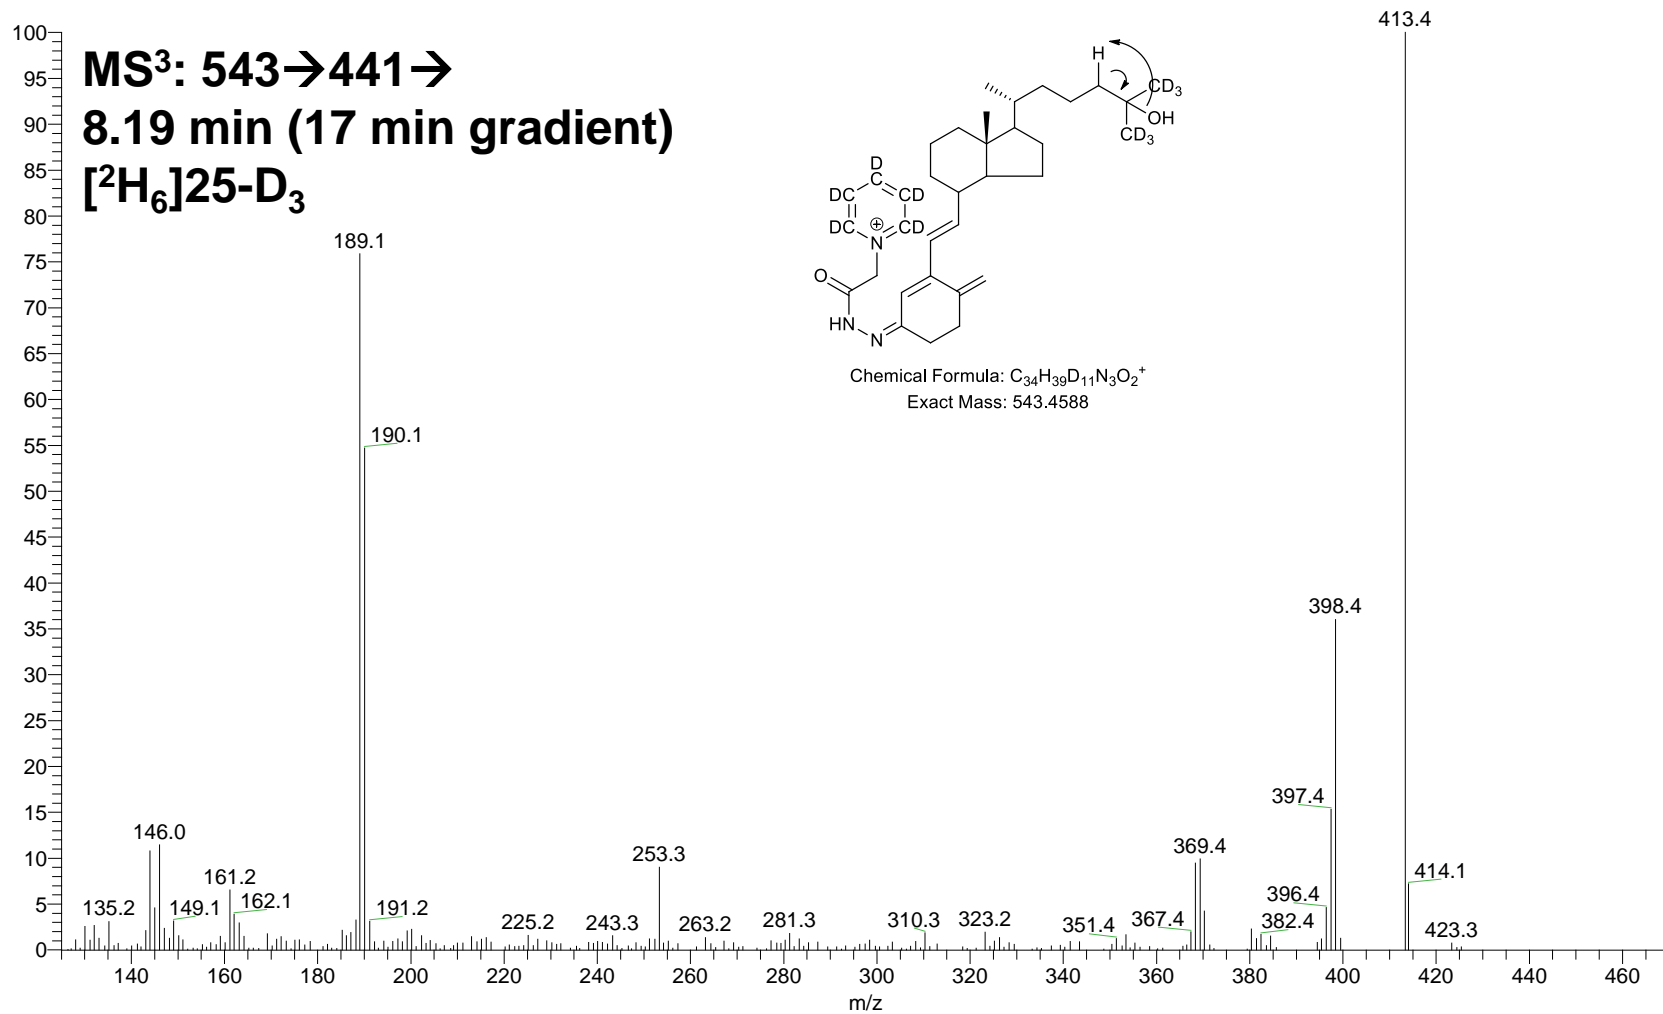

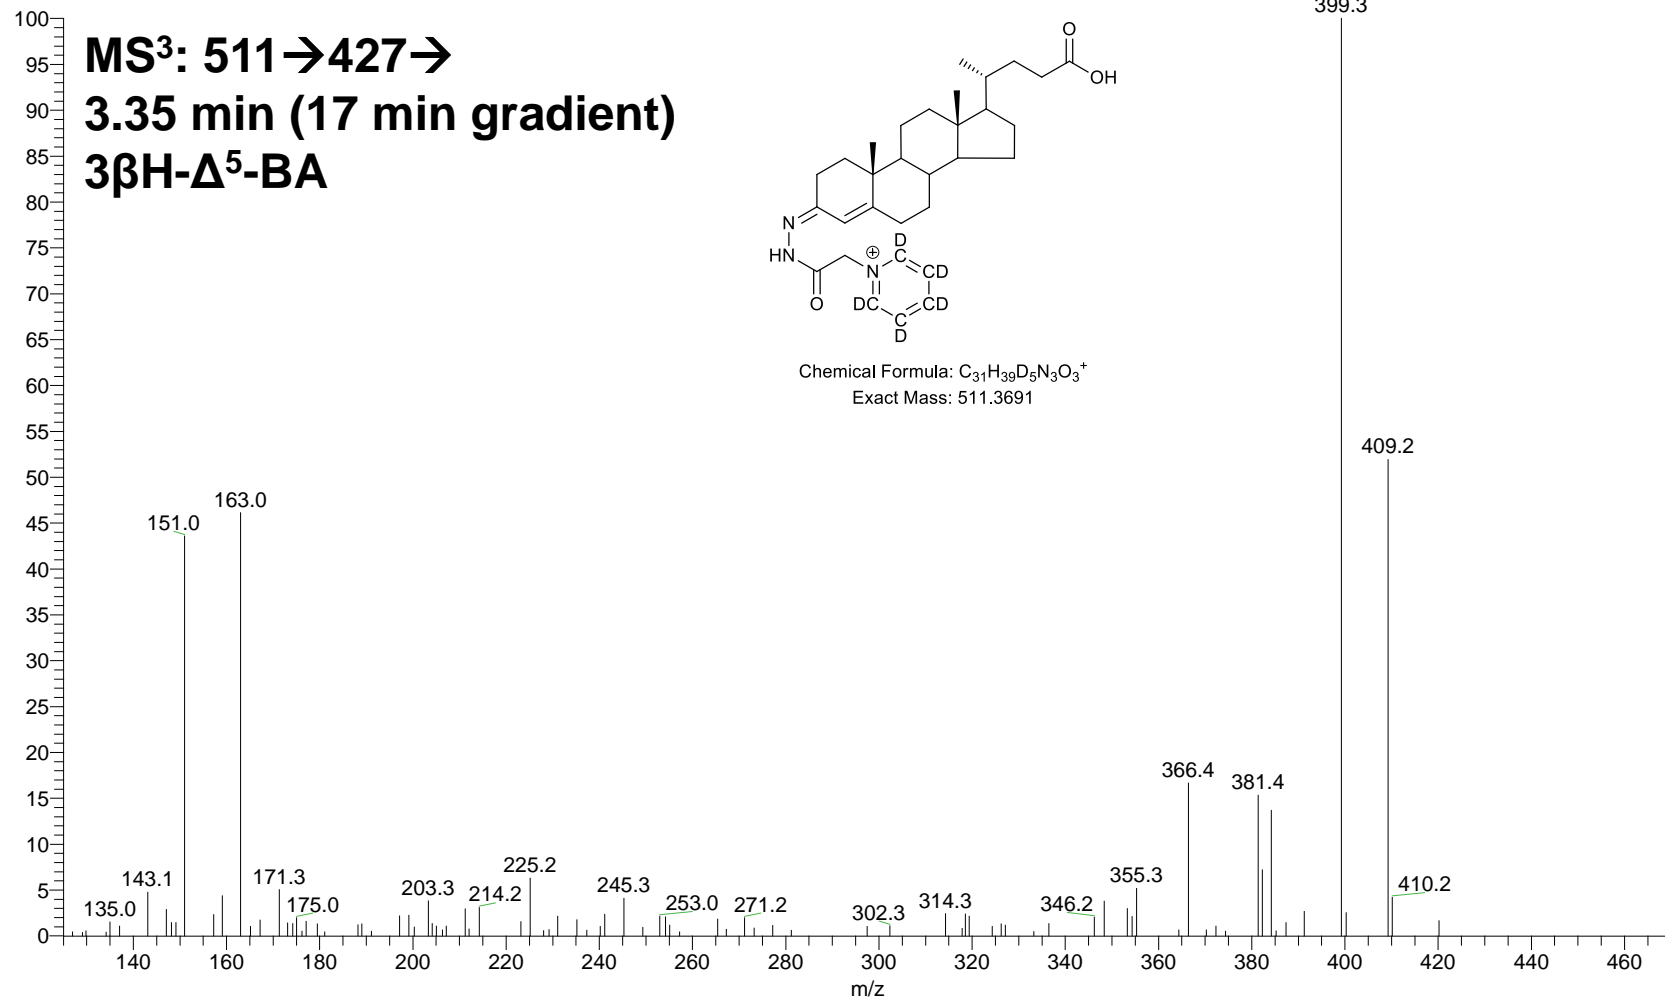



EY\_191014\_100uL-NIST-QC\_100uL-OxySpla... 10/15/19 04:07:57  
100uL NIST (2018) + 100ul OxysterolSPLASH + 10ng 22S-HCO-D7 + 20ug  
EY\_191014\_100uL-NIST-QC\_100uL-OxySplash\_rep2of5\_Fr1A=GPd5\_Fr1E  
F: ITMS + c ESI Full ms3 527.36@cid30.00 443.29@cid35.00 [120.00-535.00]

.12 AV: 1 NL: 1.08E3

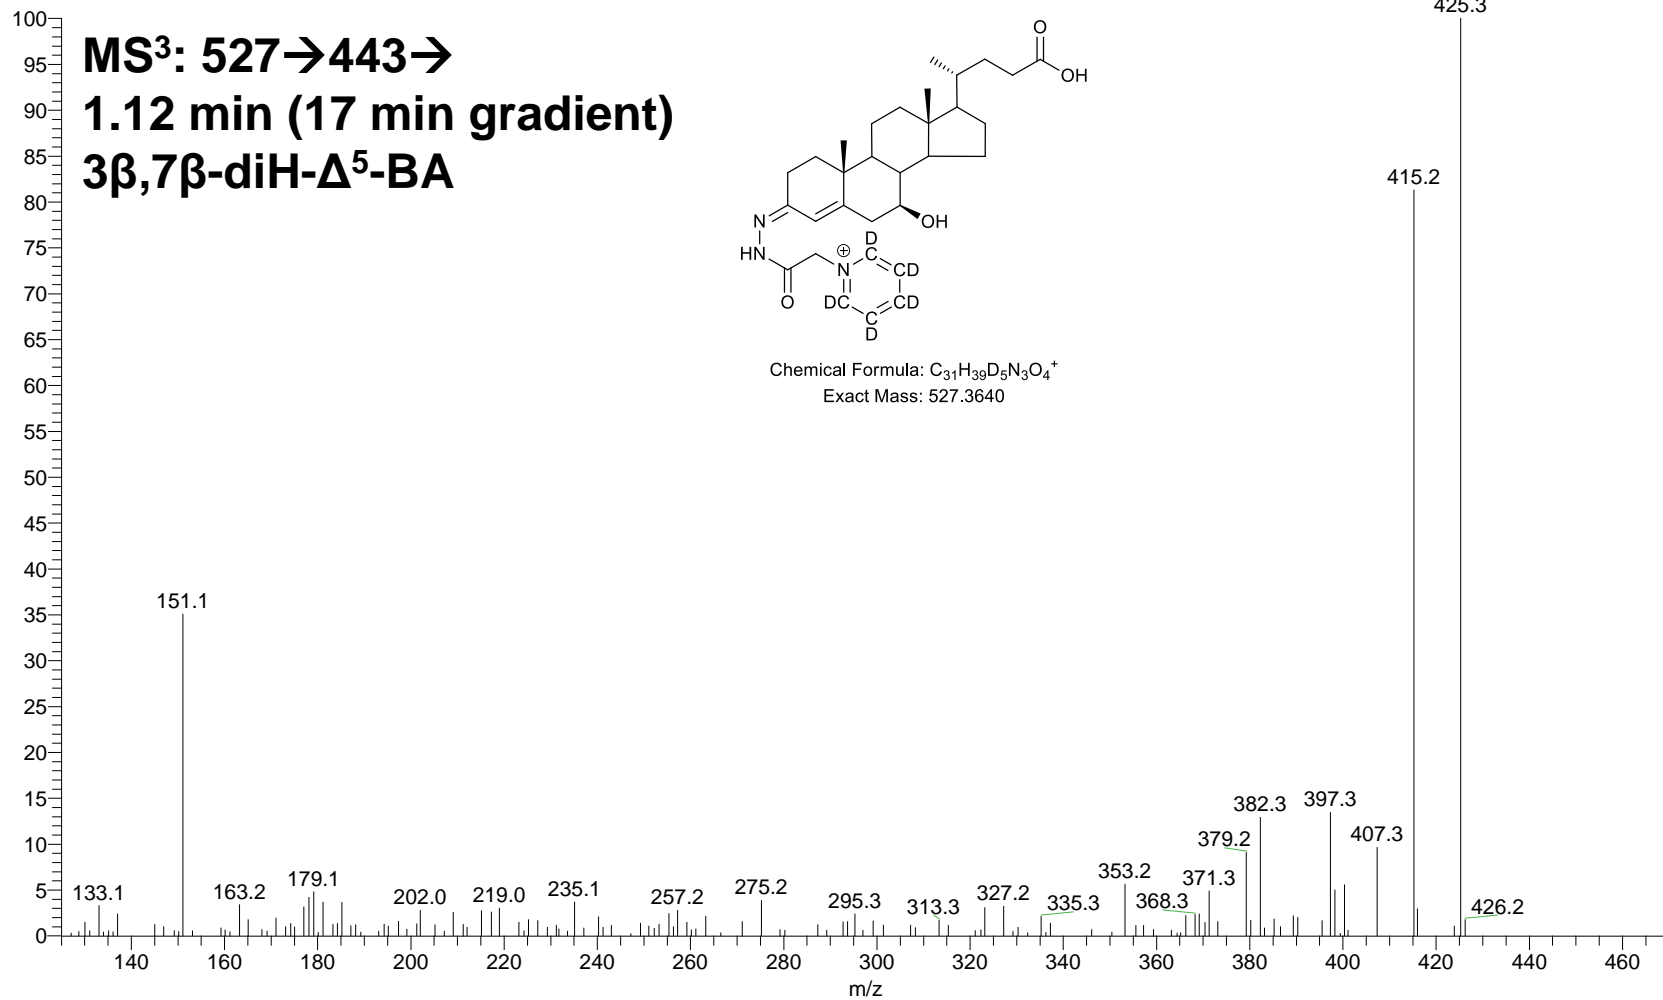

EY\_191014\_100uL-NIST-QC\_100uL-OxySpla... 10/15/19 04:07:57  
100uL NIST (2018) + 100ul OxysterolSPLASH + 10ng 22S-HCO-D7 + 20ug  
EY\_191014\_100uL-NIST-QC\_100uL-OxySplash\_rep2of5\_Fr1A=GPd5\_Fr1E  
F: ITMS + c ESI Full ms3 527.36@cid30.00 443.29@cid35.00 [120.00-535.00]

.62 AV: 1 NL: 3.59E3

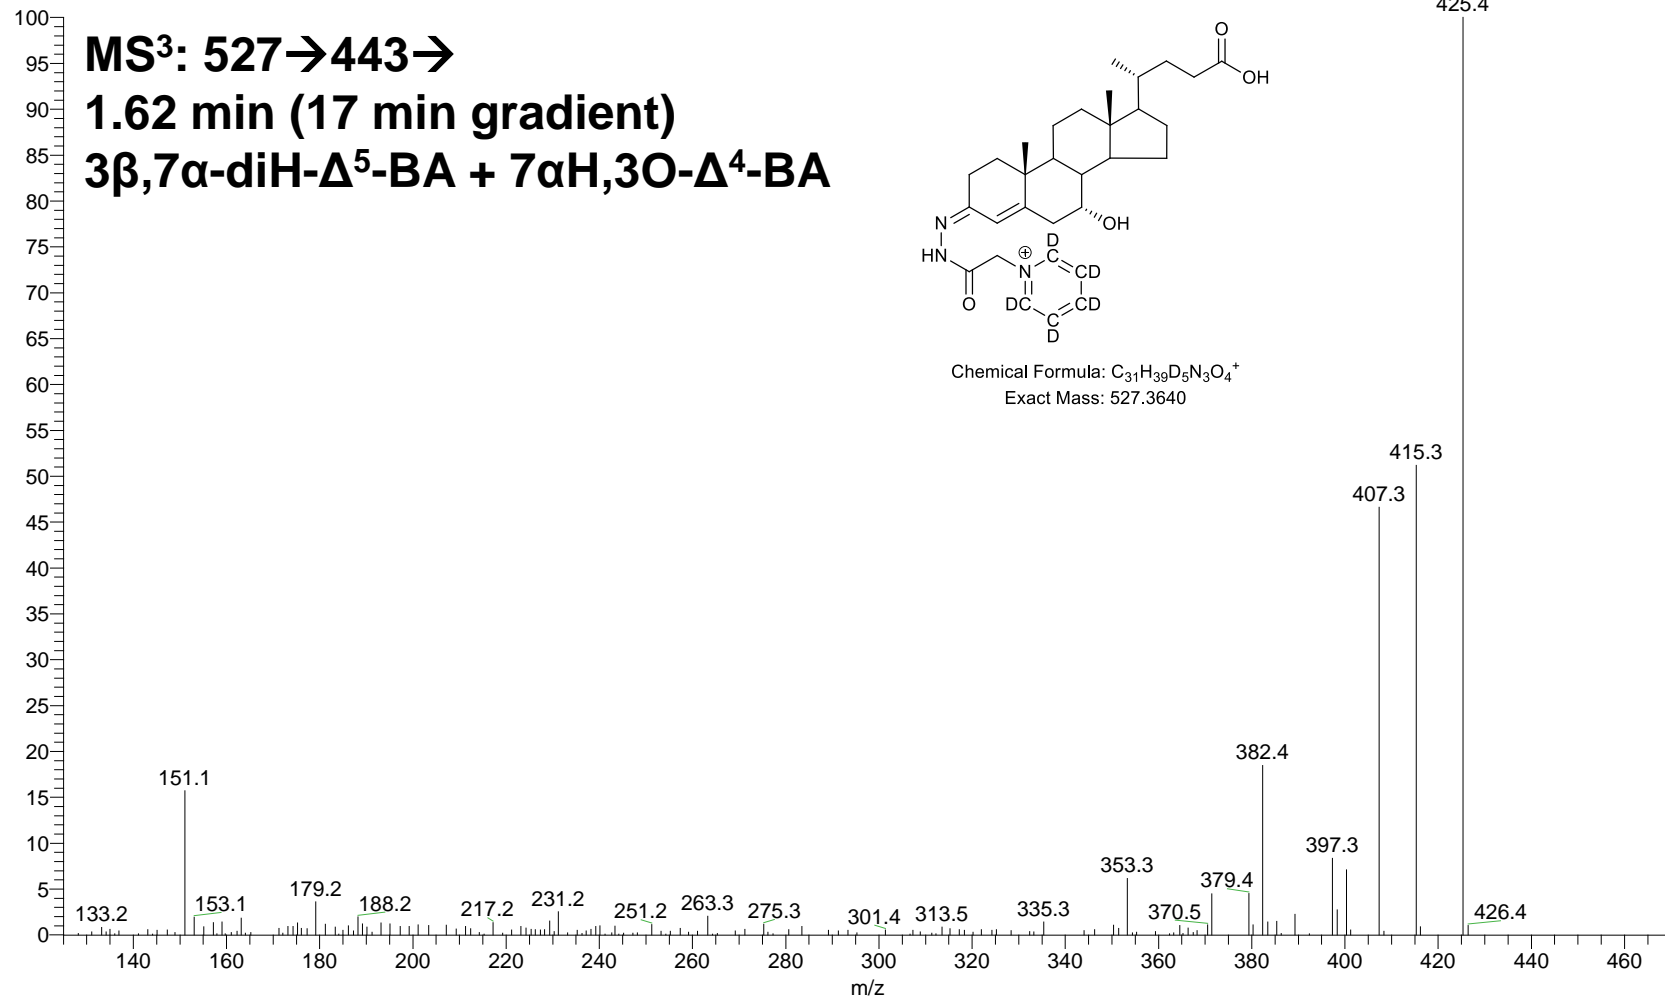

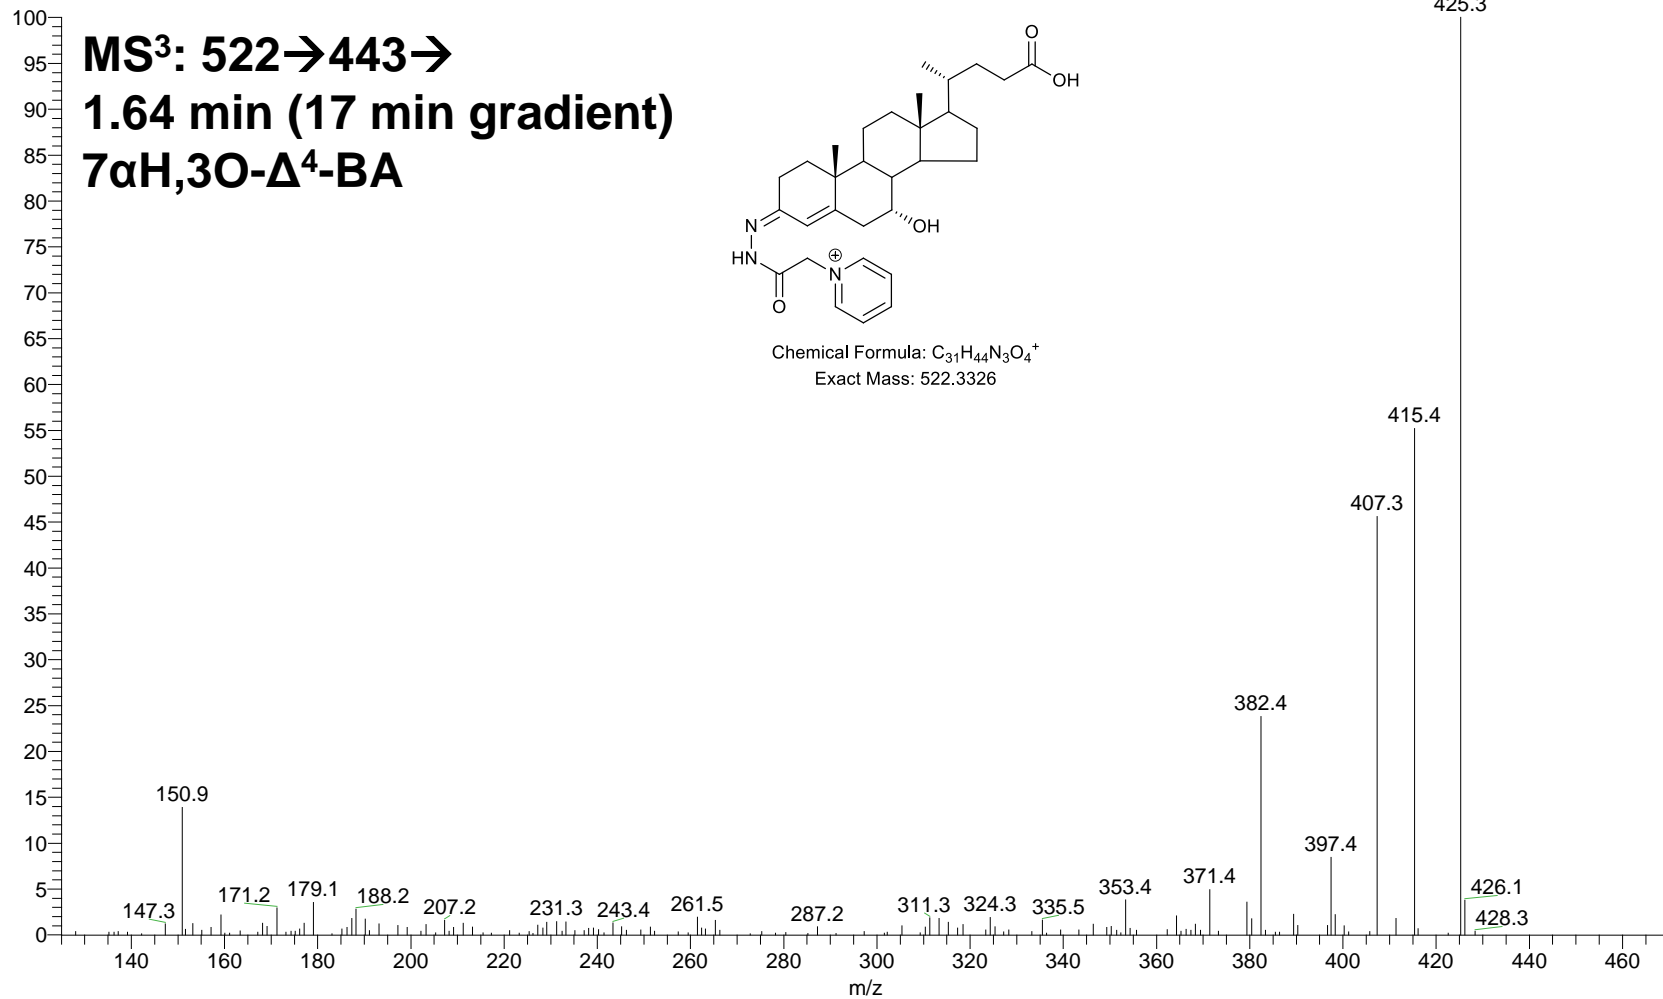

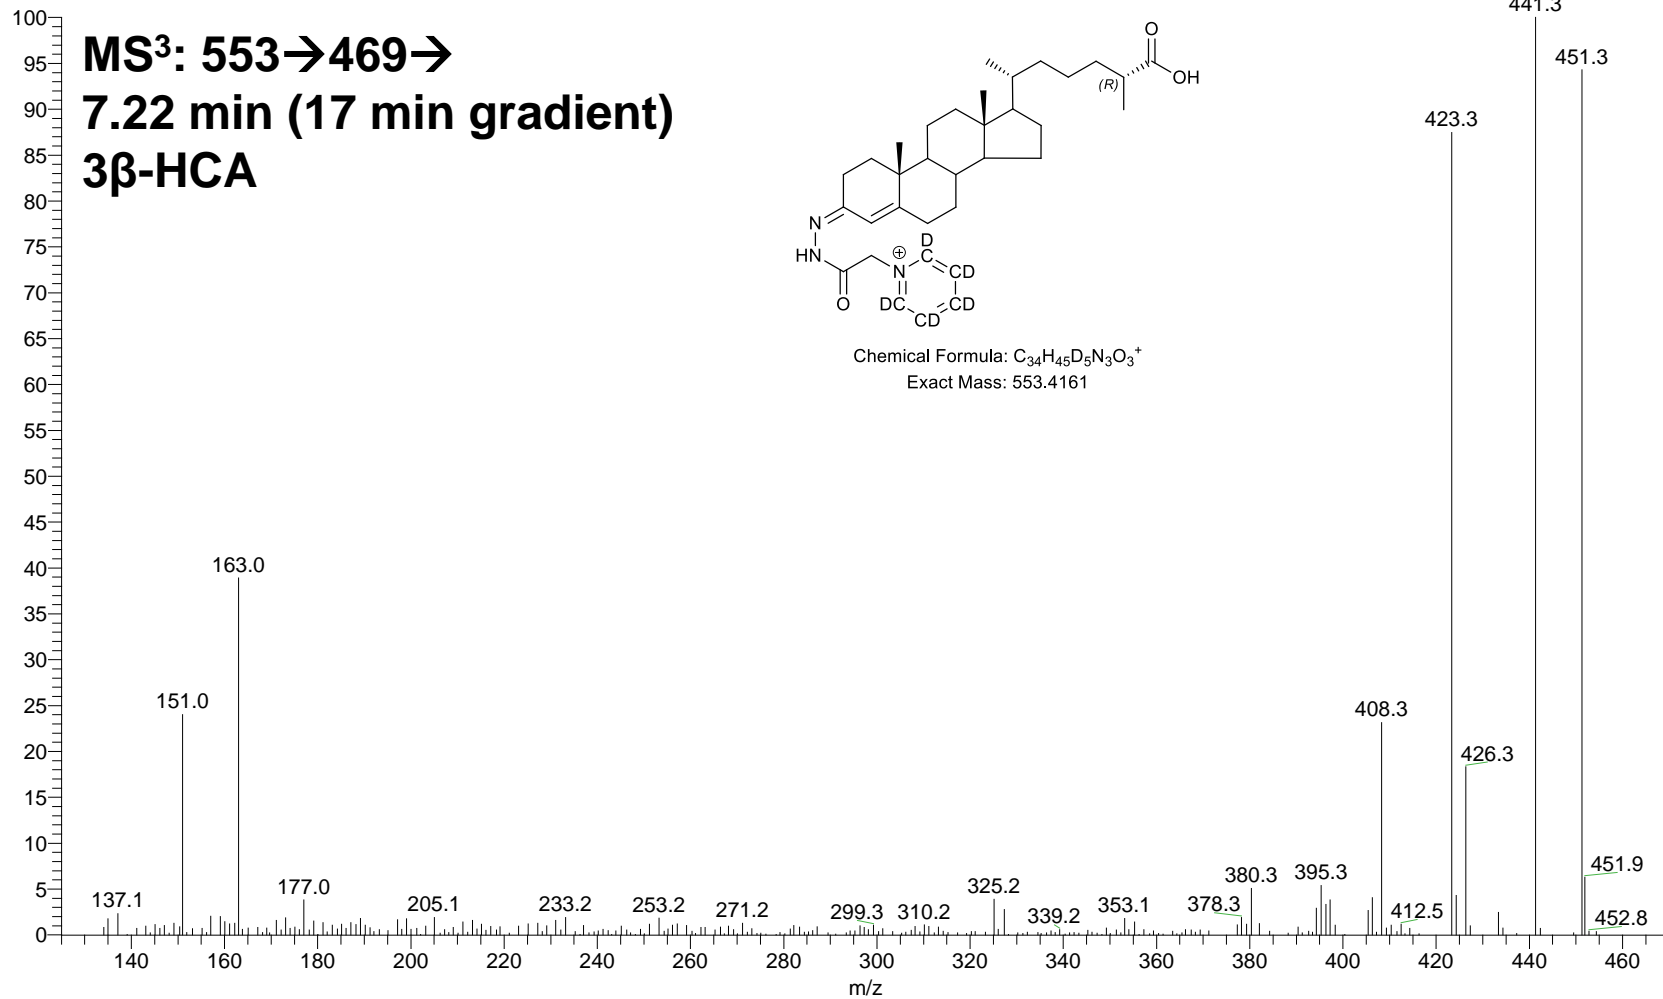

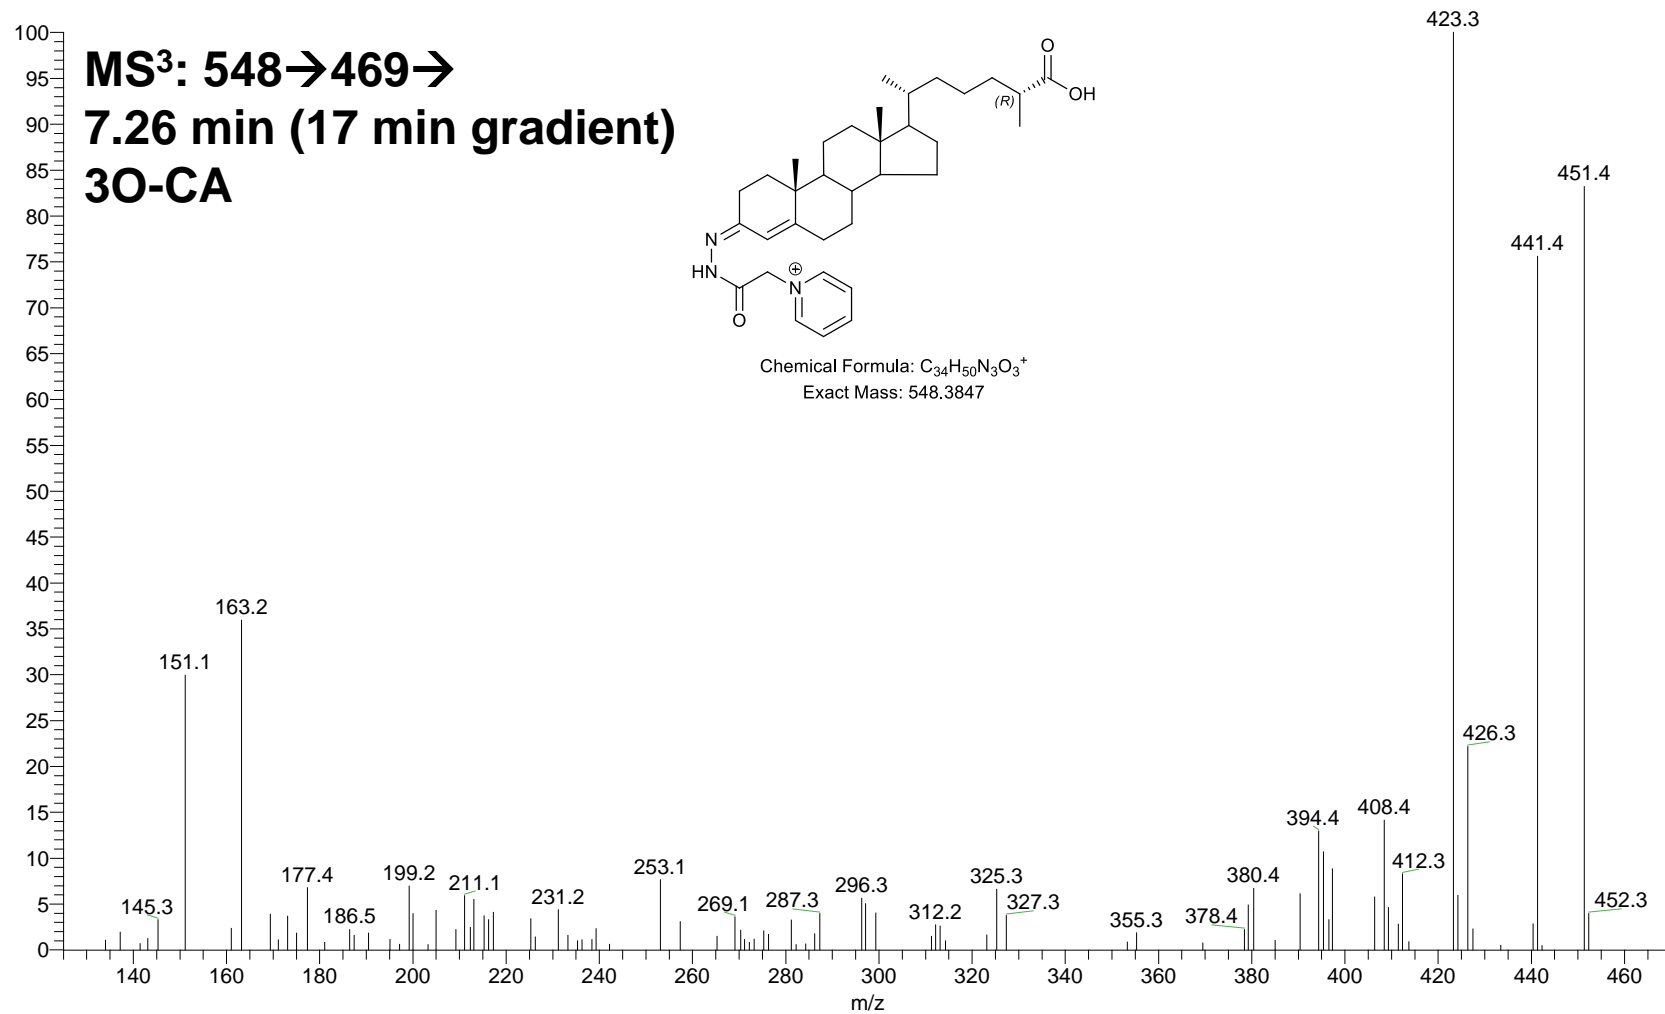

EY\_191014\_100uL-NIST-QC\_100uL-OxySpla... 10/15/19 04:28:42  
100uL NIST (2018) + 100ul OxysterolSPLASH + 10ng 22S-HCO-D7 + 20ug  
EY\_191014\_100uL-NIST-QC\_100uL-OxySplash\_rep2of5\_Fr1A=GPd5\_Fr1E  
F: ITMS + c ESI Full ms3 585.41@cid30.00 501.33@cid35.00 [135.00-590.00]

T: 1.56-1.60 AV: 3 NL: 5.27E1

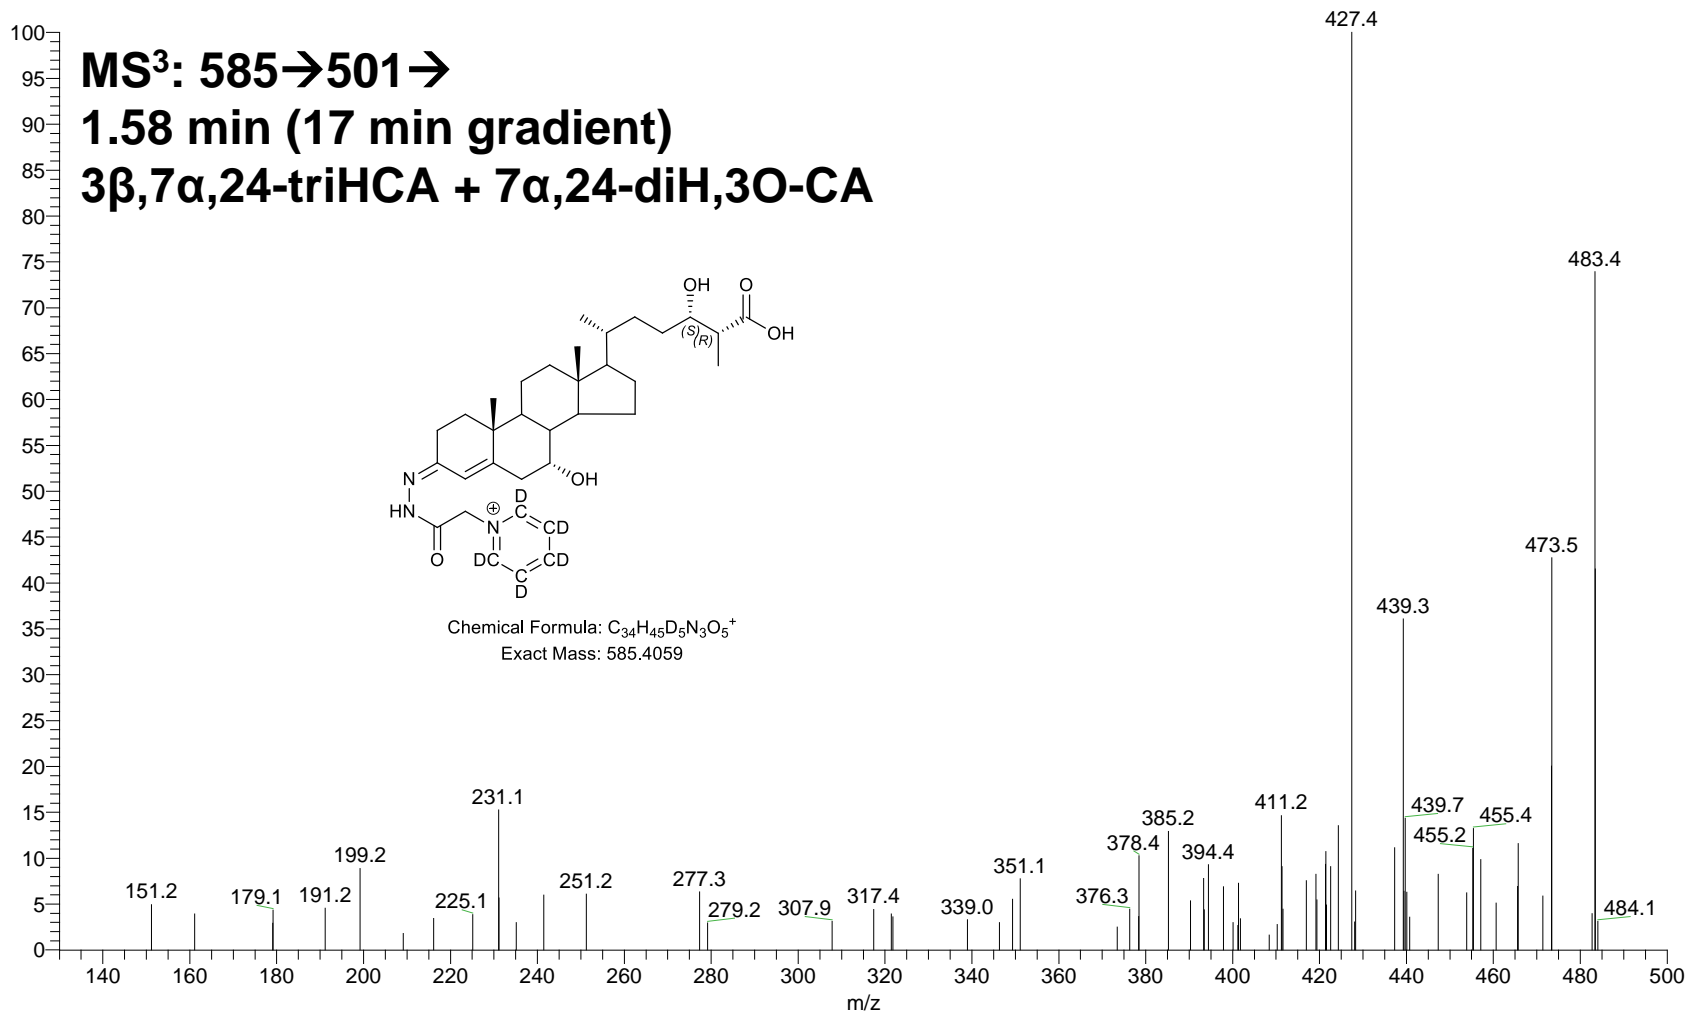

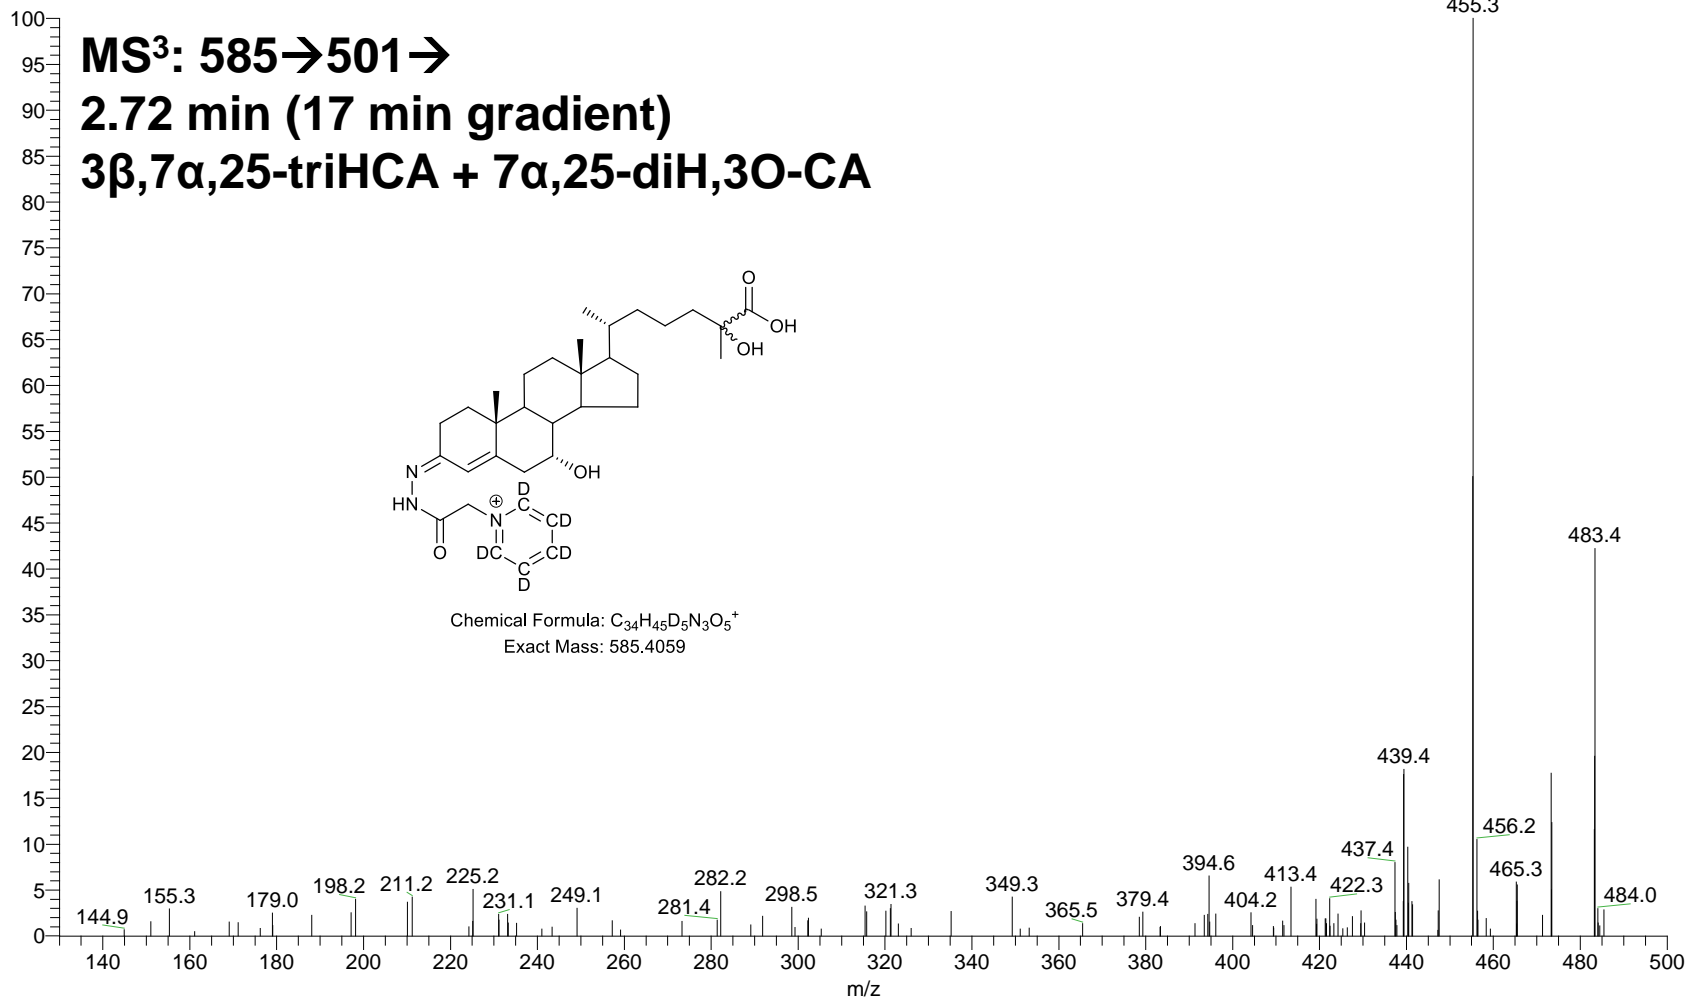

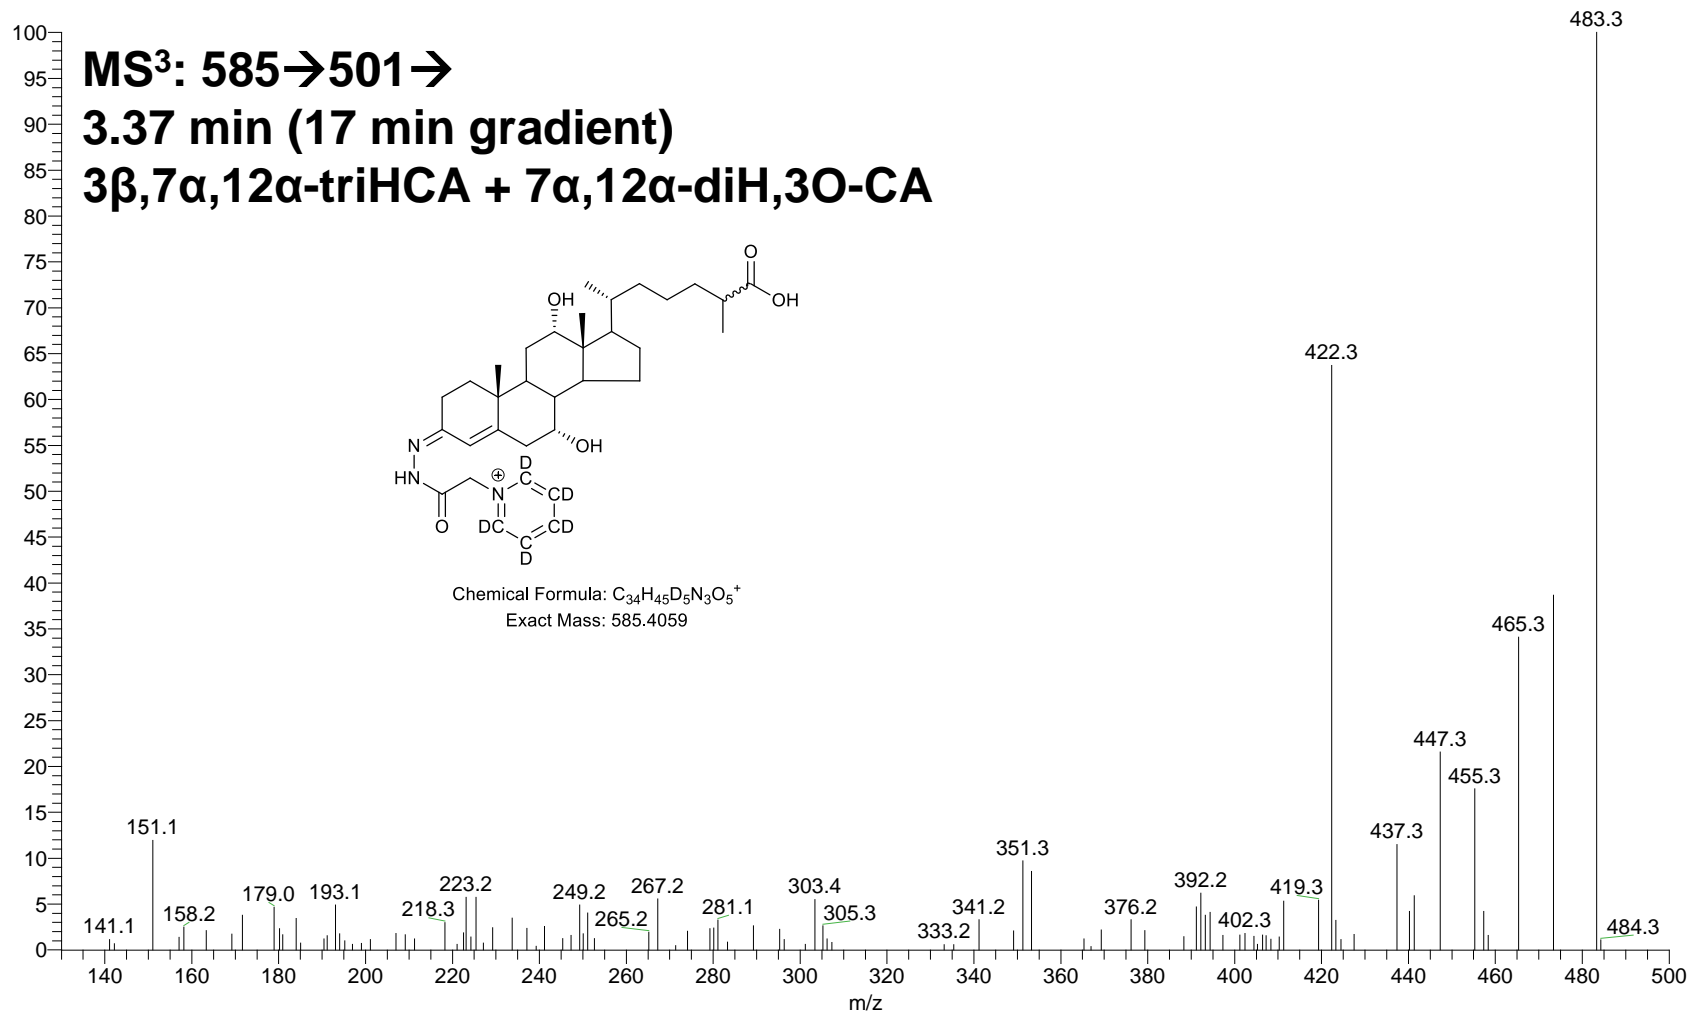



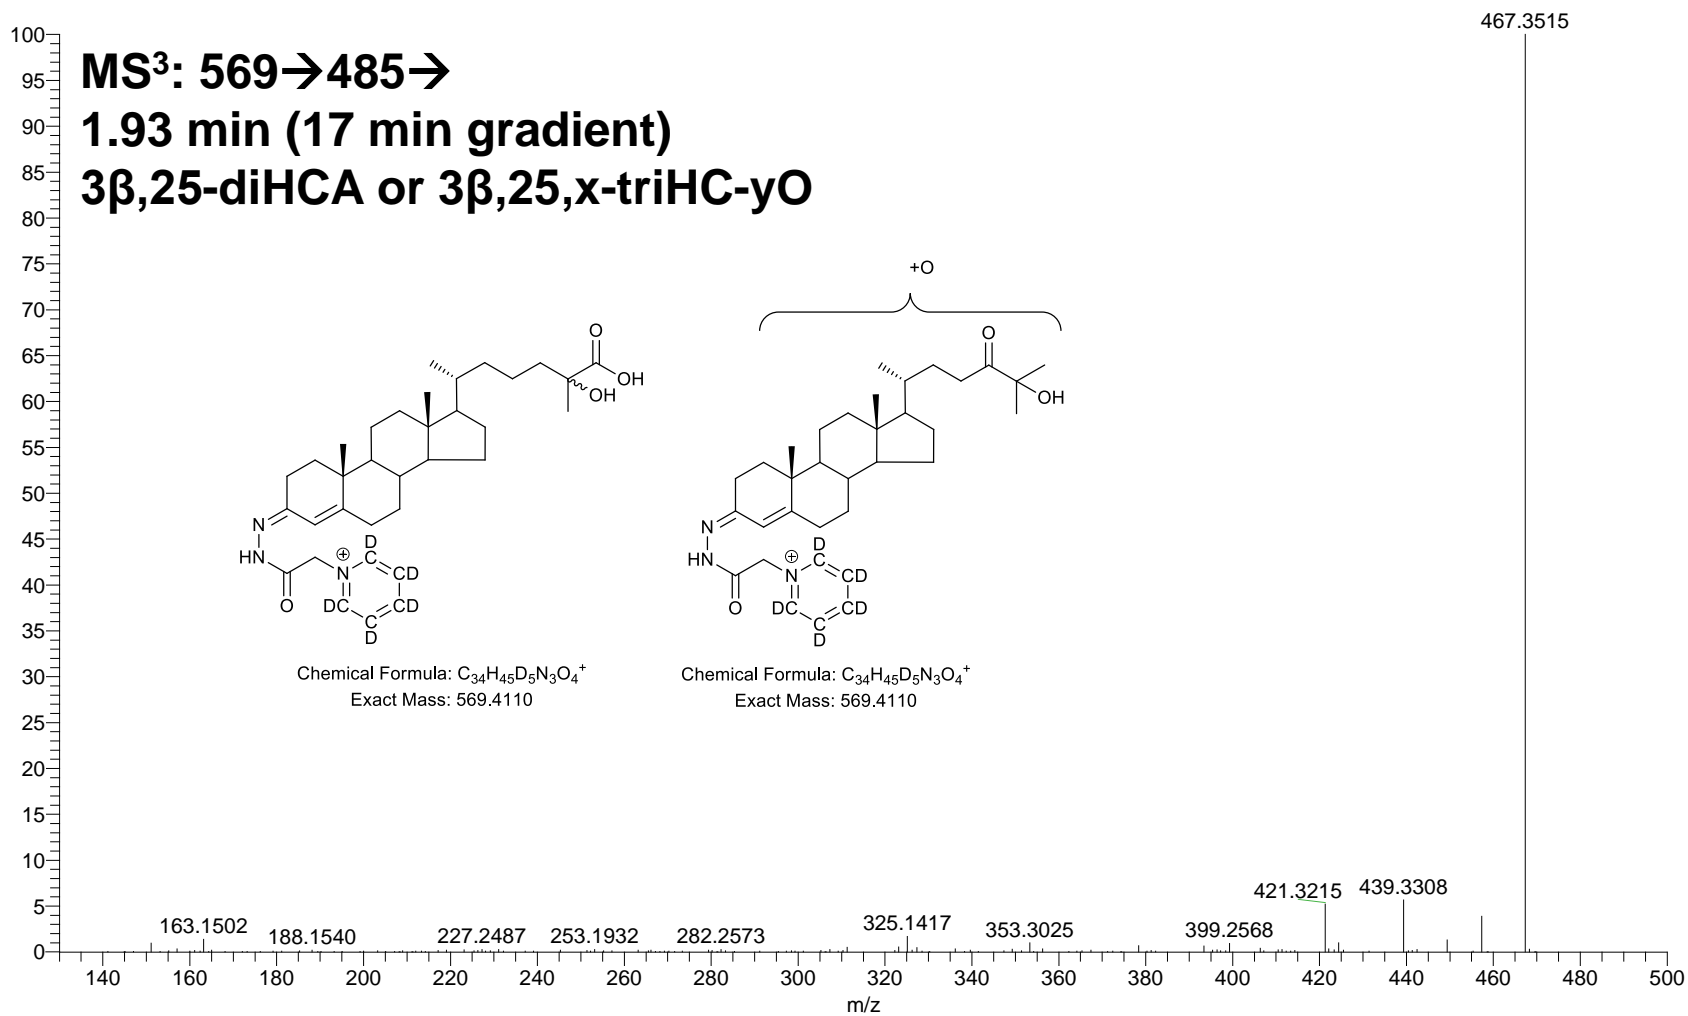

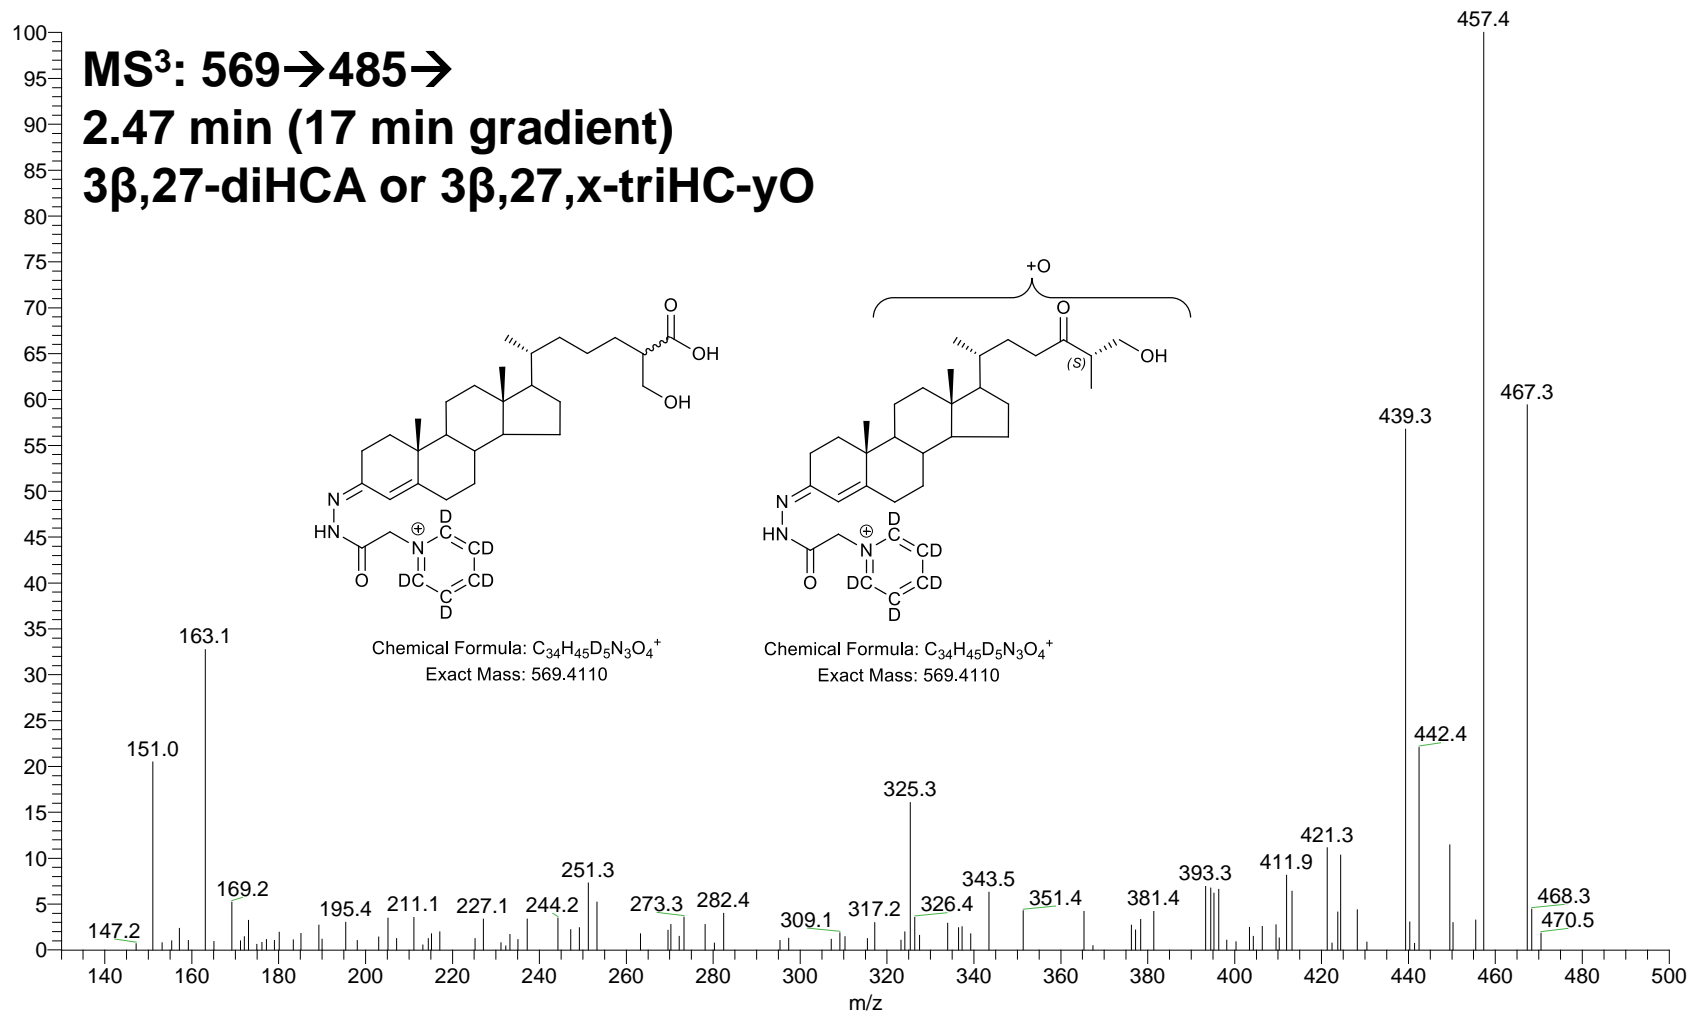

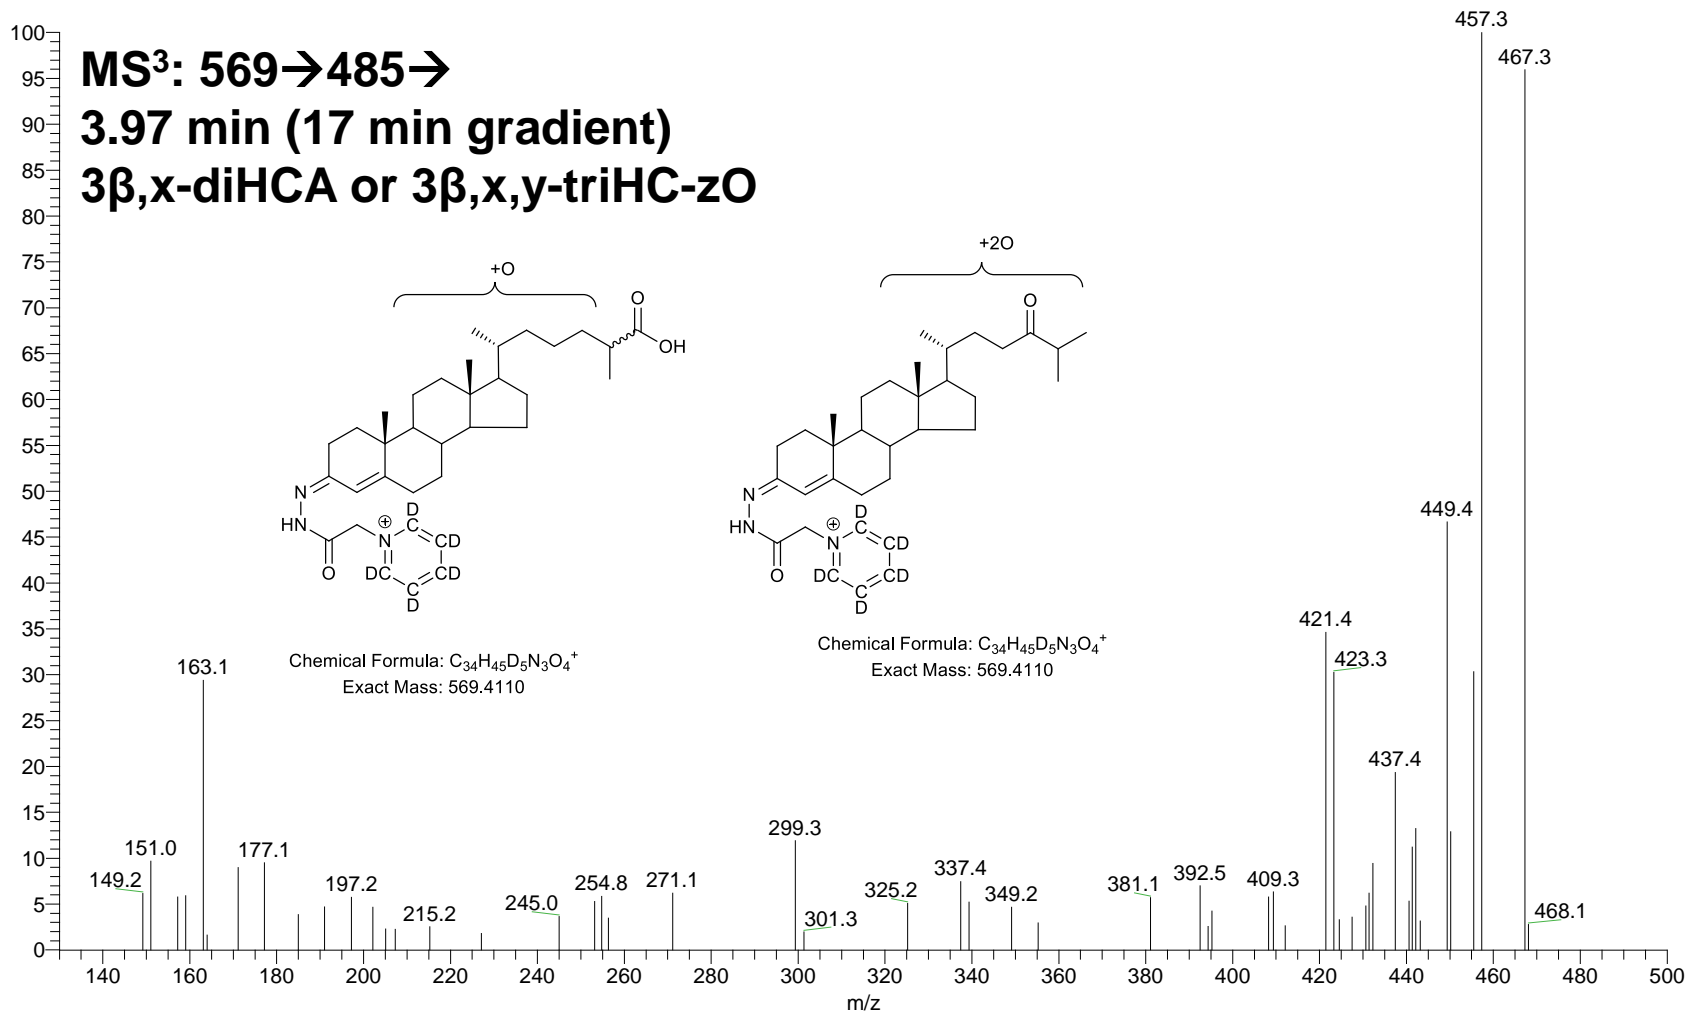

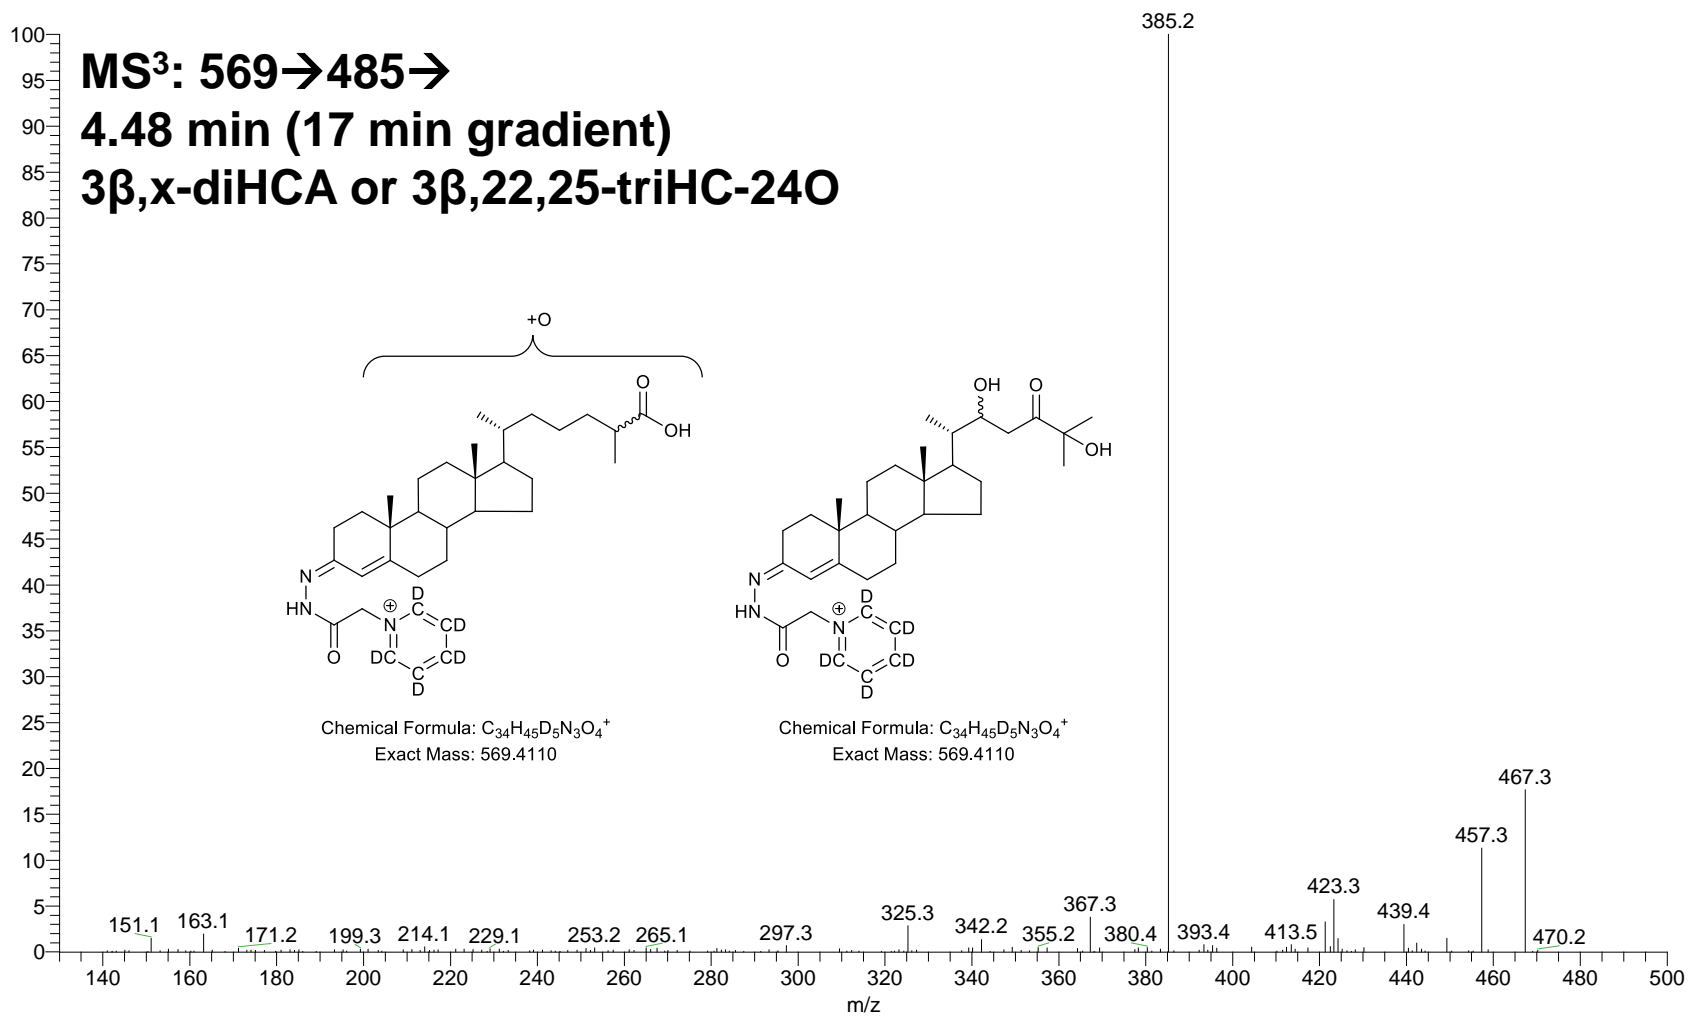

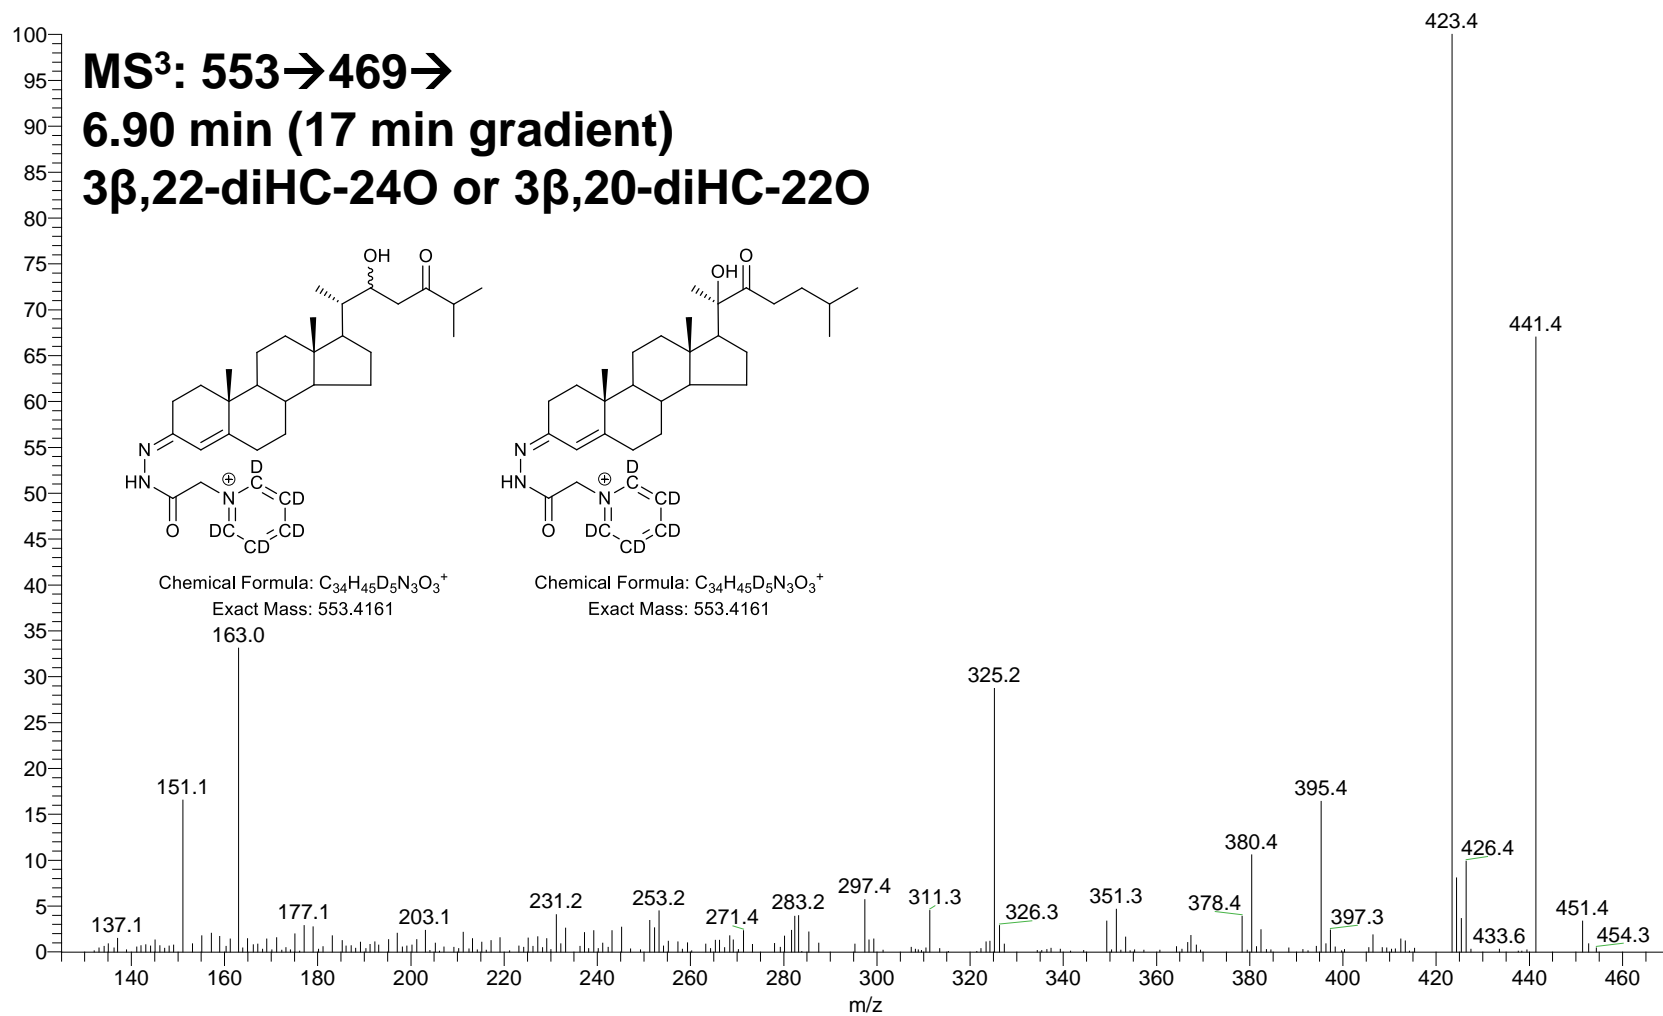

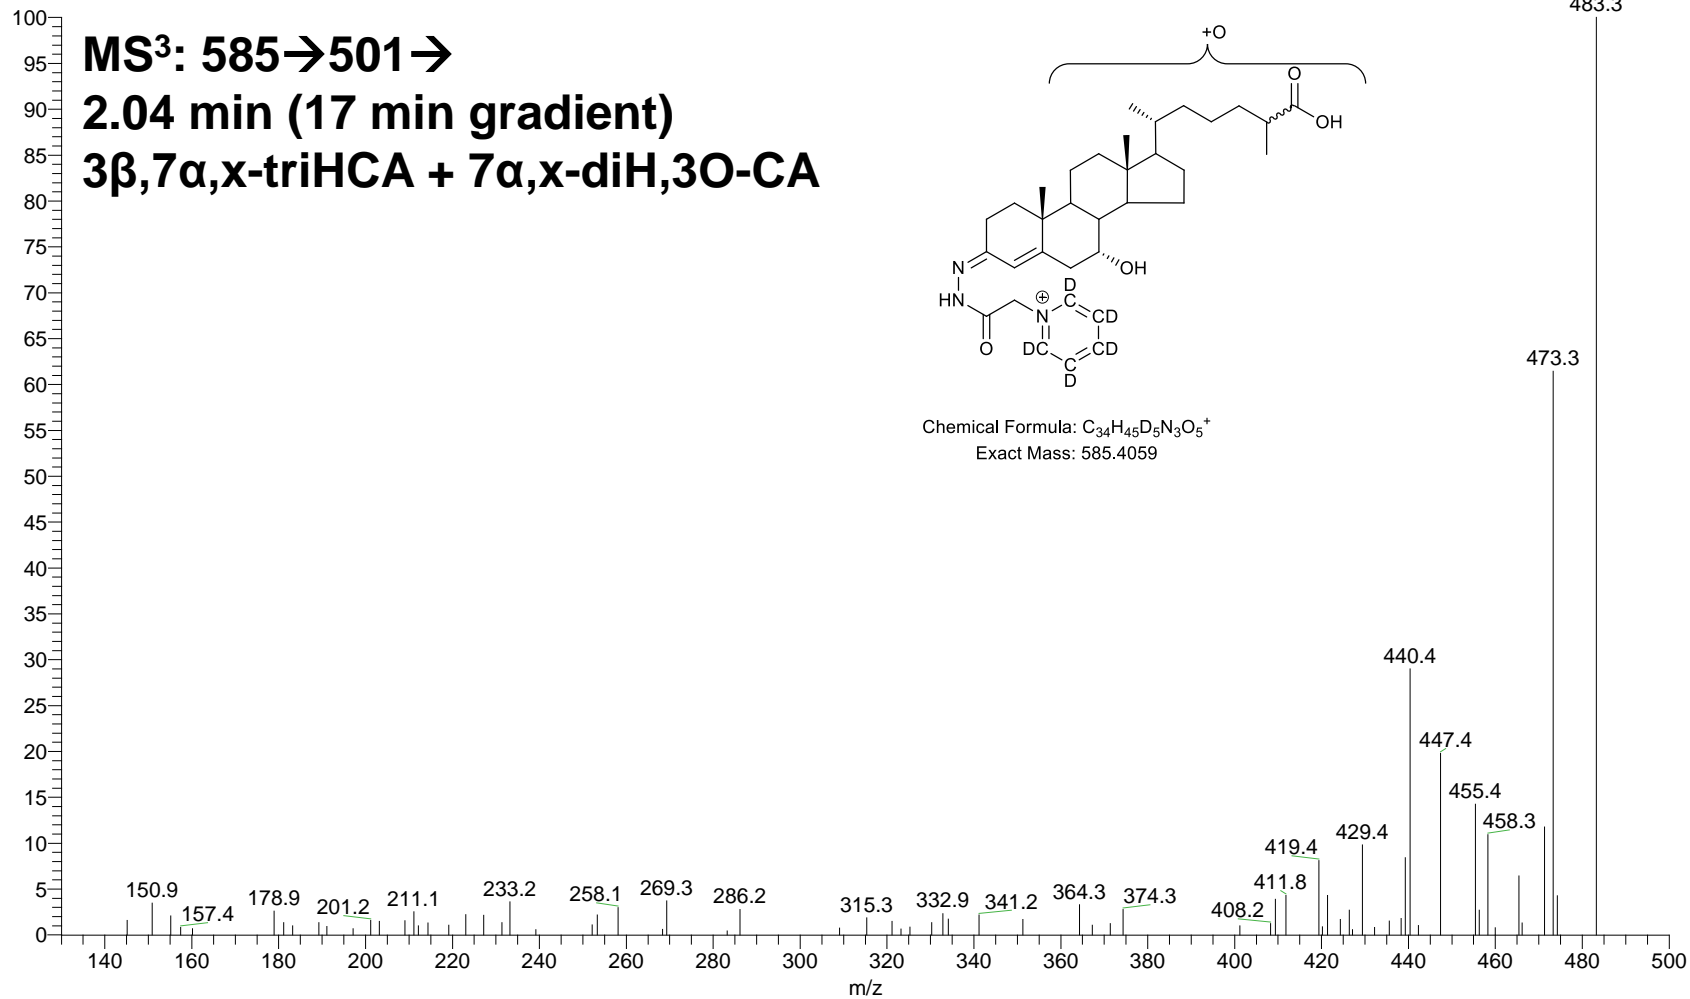

EY\_191029\_100uL-Cambridge-CSF-pool\_20... 10/29/19 21:38:19  
100uL Cambridge Pooled CSF (2019) + 20uL OxysterolSPLASH + 1ng 22S-I  
EY\_191029\_100uL-Cambridge-CSF-pool\_20uL-OxySPLASH\_r2\_NON-HYD  
F: ITMS + c ESI Full ms3 585.41@cid30.00 501.33@cid35.00 [135.00-590.0

rified)

A=GPd5\_Fr1B=GPd0\_s2\_neat\_07 #425 RT: 1.87 AV: 1 NL: 3.01E2

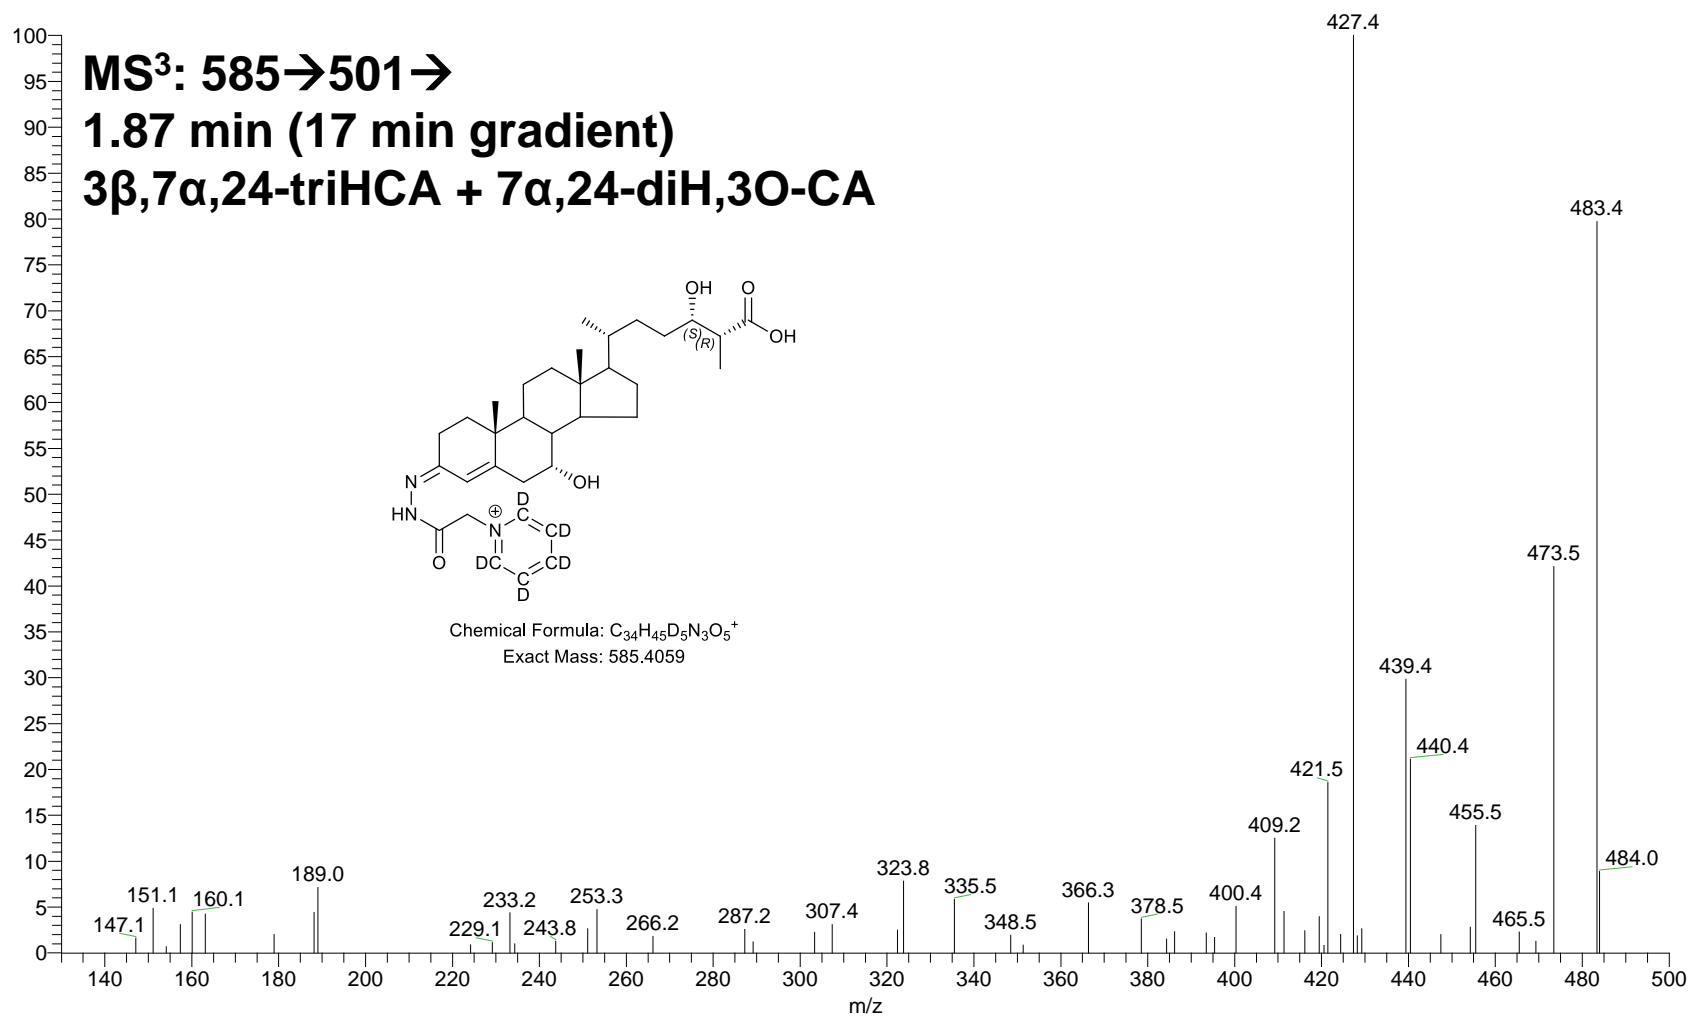

EY\_191029\_100uL-Cambridge-CSF-pool\_20... 10/29/19 21:38:19  
100uL Cambridge Pooled CSF (2019) + 20uL OxysterolSPLASH + 1ng 22  
EY\_191029\_100uL-Cambridge-CSF-pool\_20uL-OxySPLASH\_r2\_NON-H  
F: ITMS + c ESI Full ms3 585.41@cid30.00 501.33@cid35.00 [135.00-59

certified)  
r1A=GPd5\_fr1B=GPd0\_s2\_neat\_07 #700 RT: 3.11 AV: 1 NL: 1.34E3

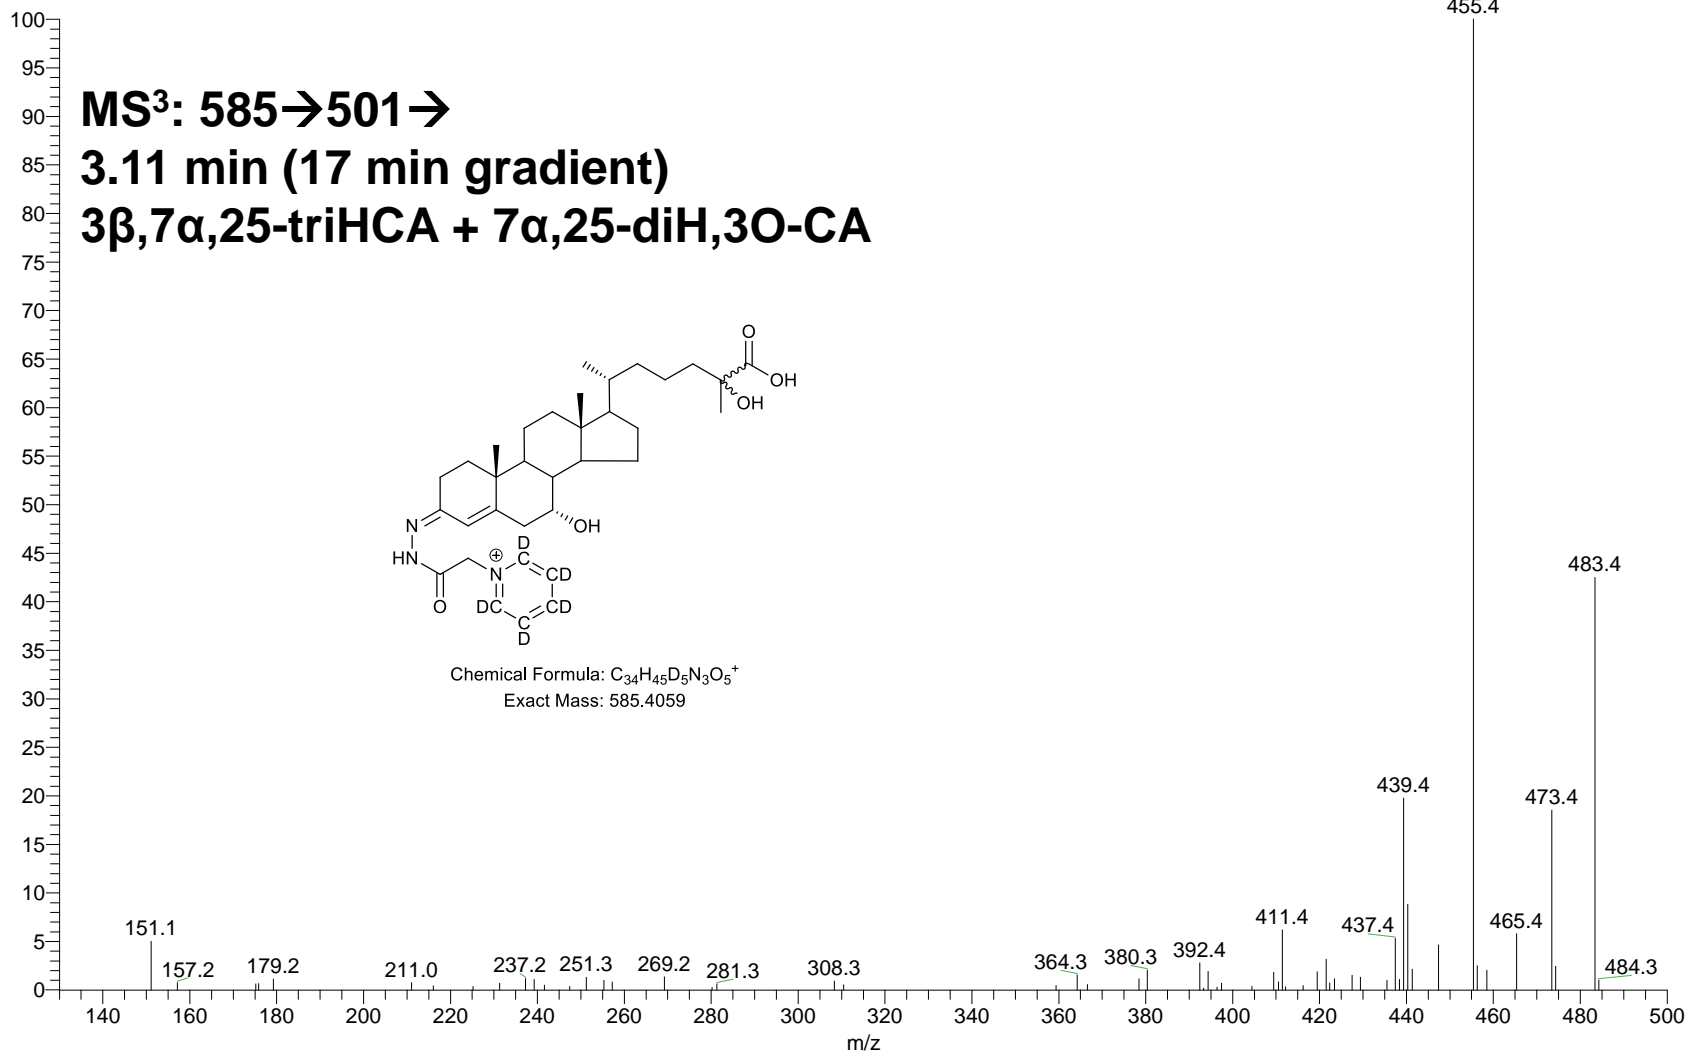



EY\_191029\_100uL-Cambridge-CSF-pool\_20... 10/29/19 21:38:19  
100uL Cambridge Pooled CSF (2019) + 20uL OxySPLASH + 1ng 22  
EY\_191029\_100uL-Cambridge-CSF-pool\_20uL-OxySPLASH\_r2\_NON-H  
F: ITMS + c ESI Full ms3 585.41@cid30.00 501.33@cid35.00 [135.00-59

certified)

r1A=GPd5\_r1B=GPd0\_s2\_neat\_07 #845 RT: 3.76 AV: 1 NL: 2.89E2

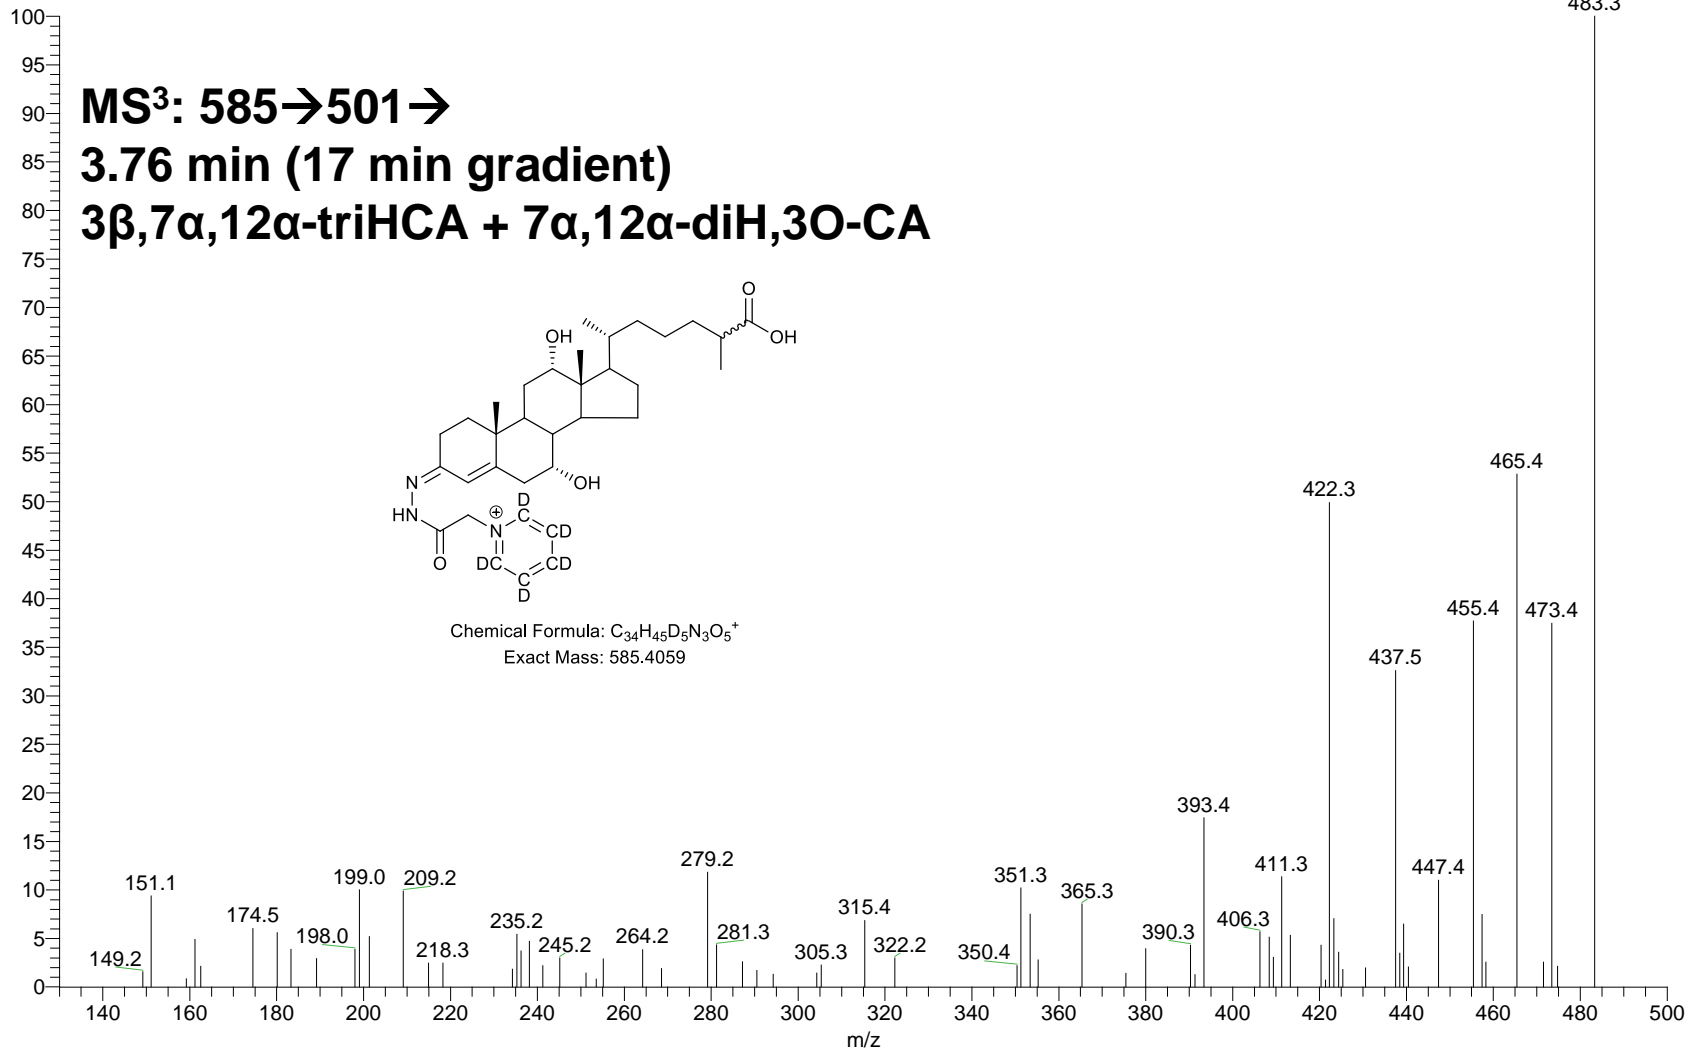

EY\_191029\_100uL-Cambridge-CSF-pool\_20... 10/29/19 21:38:19  
100uL Cambridge Pooled CSF (2019) + 20uL OxySPLASH + 1ng 22  
EY\_191029\_100uL-Cambridge-CSF-pool\_20uL-OxySPLASH\_r2\_NON-H  
F: ITMS + c ESI Full ms3 585.41@cid30.00 501.33@cid35.00 [135.00-59

certified)  
r1A=GPd5\_Fr1B=GPd0\_s2\_neat\_07 #540 RT: 2.39 AV: 1 NL: 3.45E3

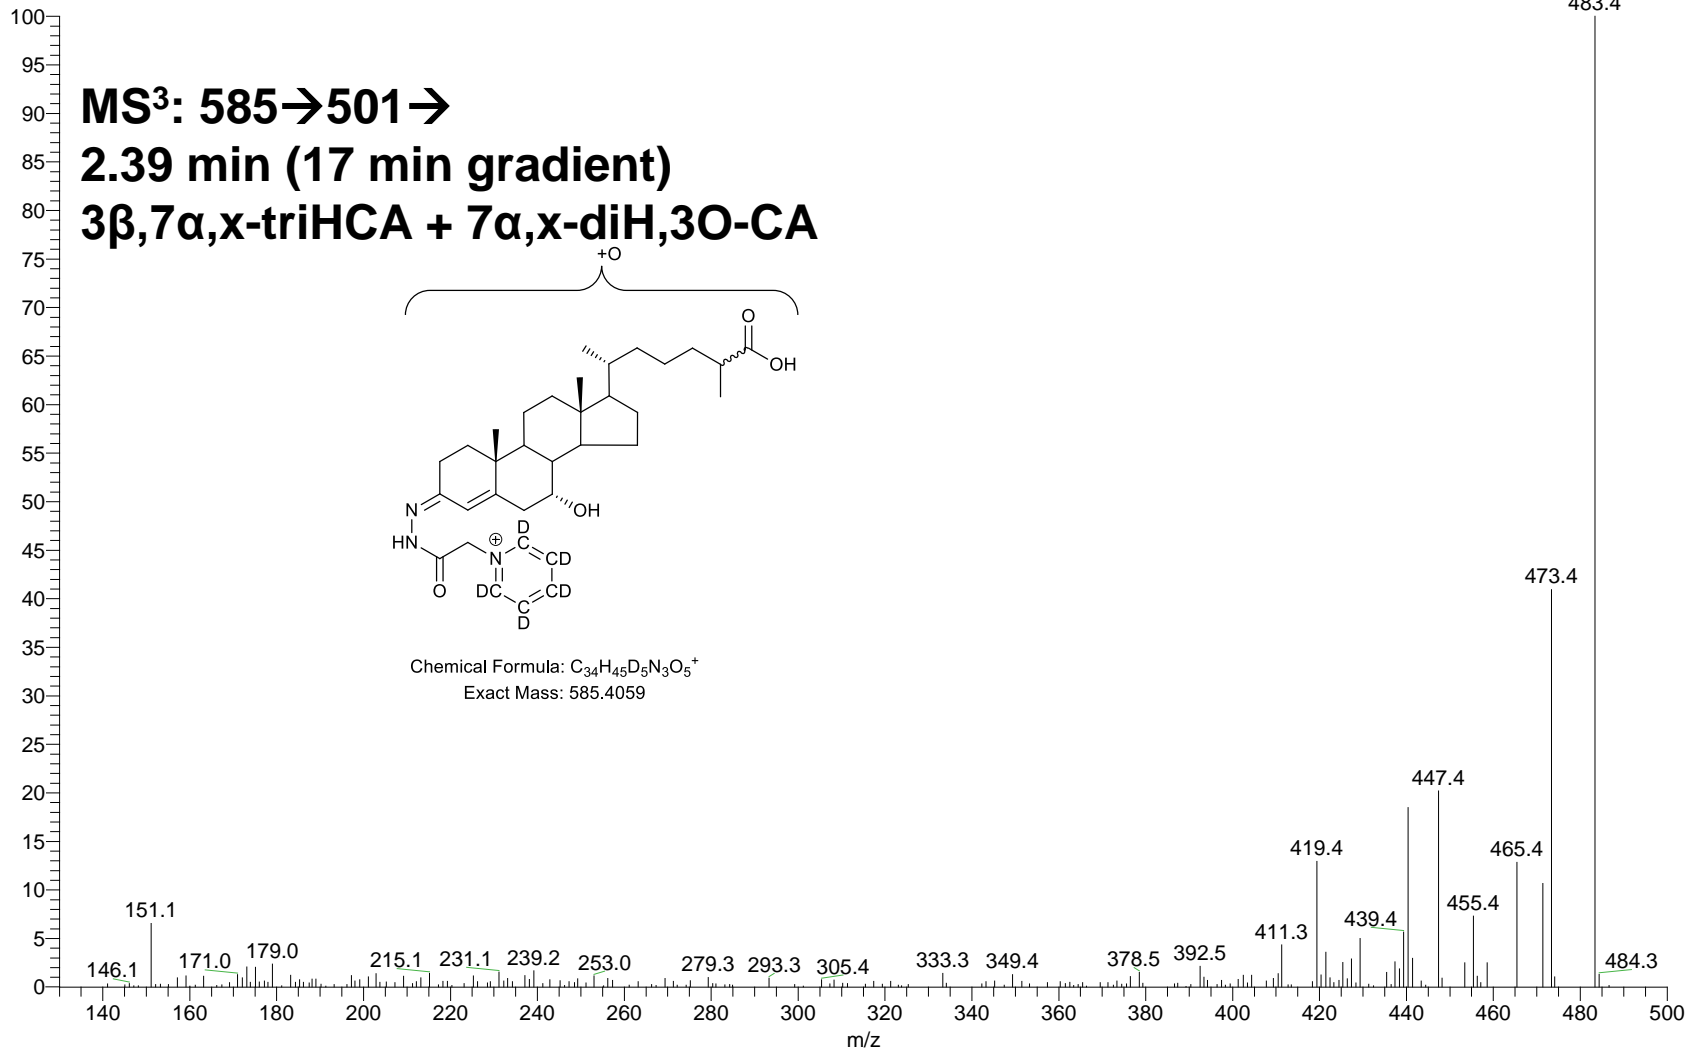

Supplement: mmc1.pdf [file mmc1.pdf]
